# Supplementary material for: Inferring pathway crosstalk networks using gene set co-expression signatures
Source: Royal Society of Chemistry journal article supplement (doi:10.1039/c3mb25506a), 2013-03-21

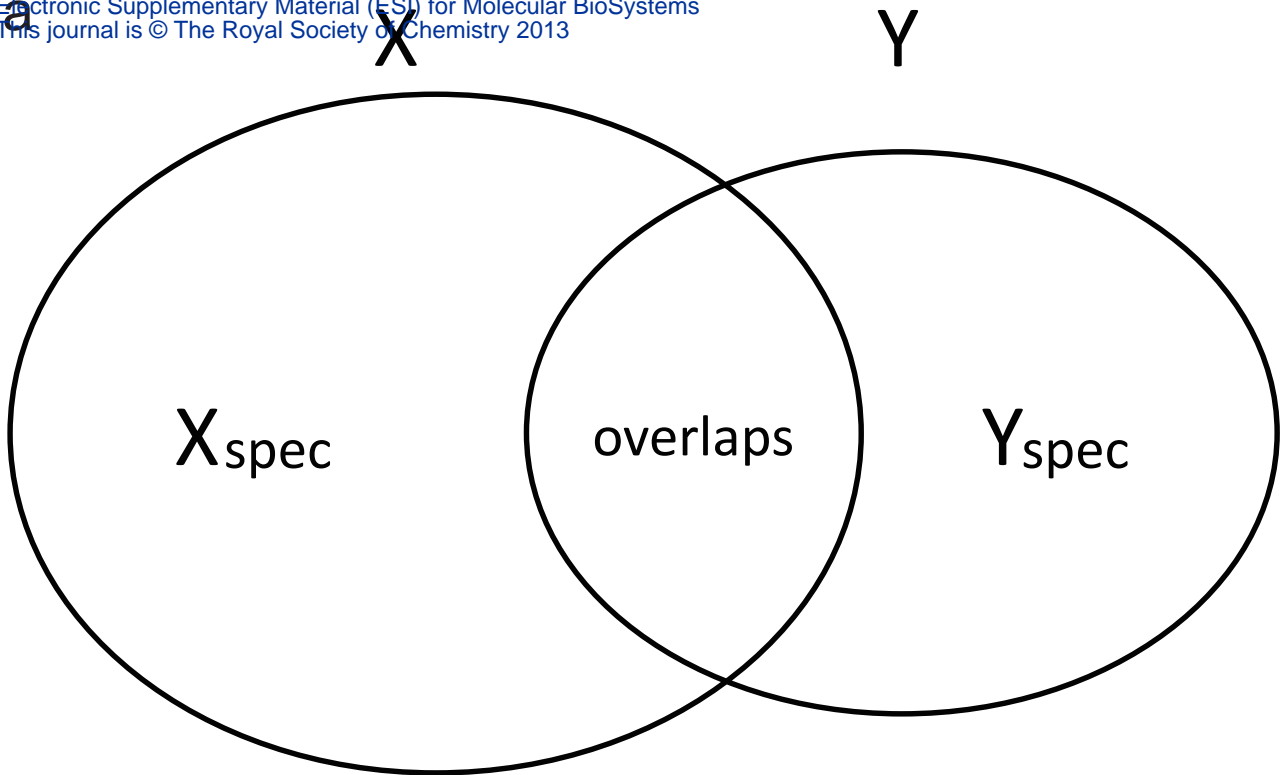

# pathway size (original and t-test filtered)

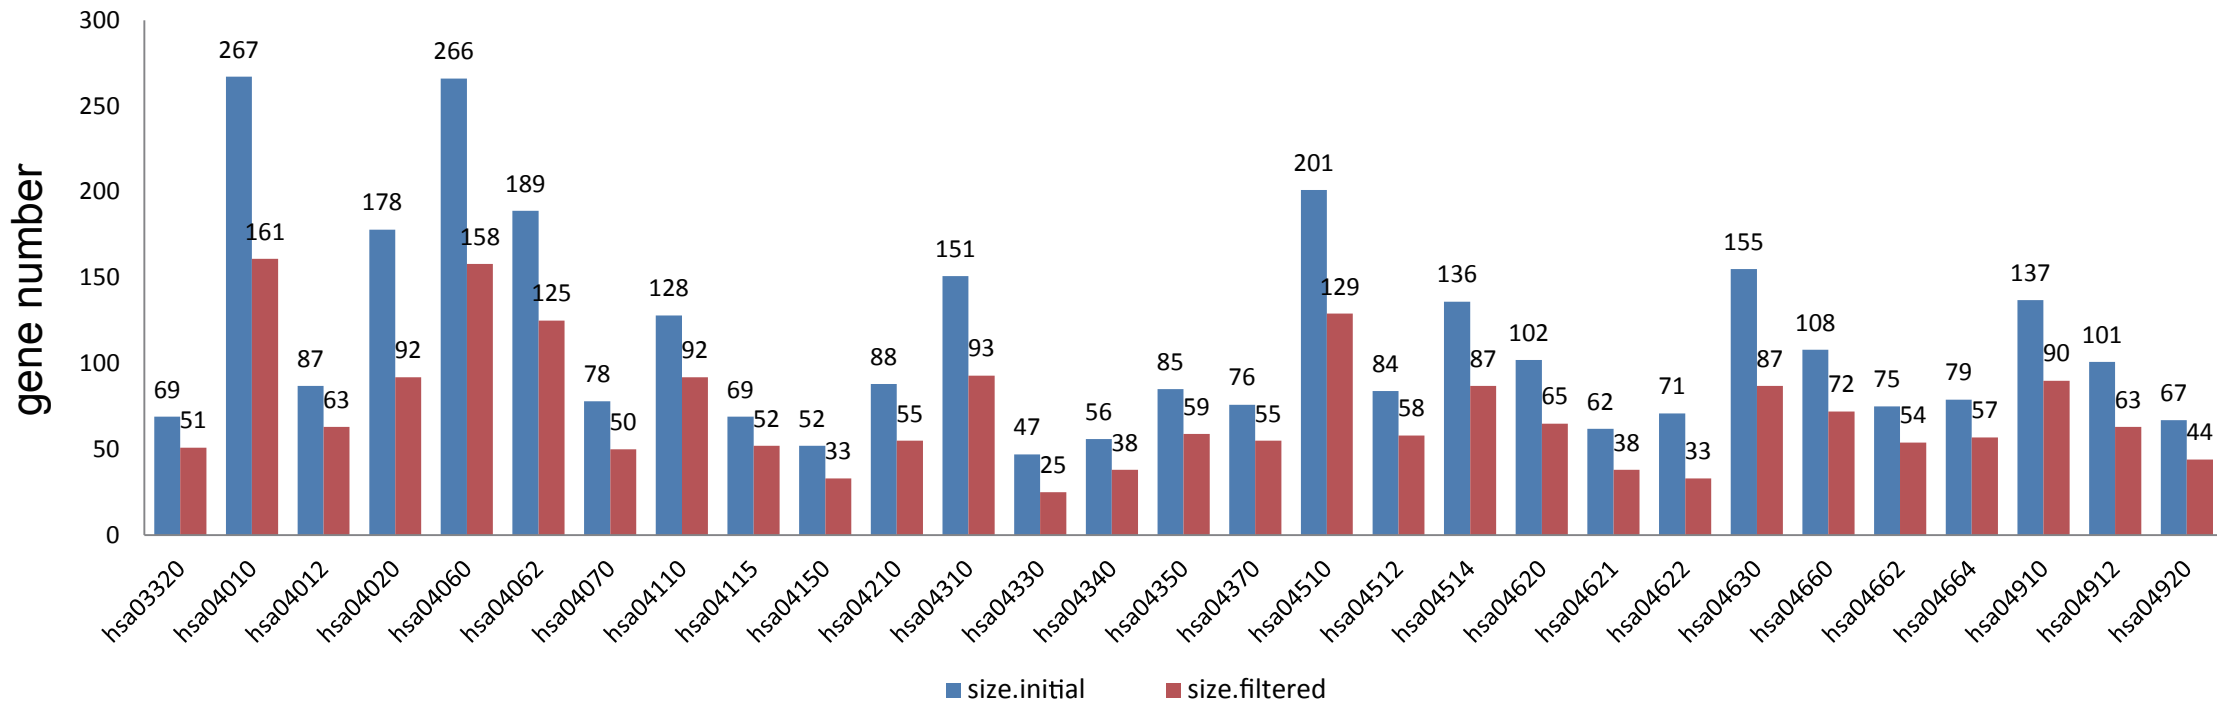

### overlap percentage for 10-time 80% sample permutations

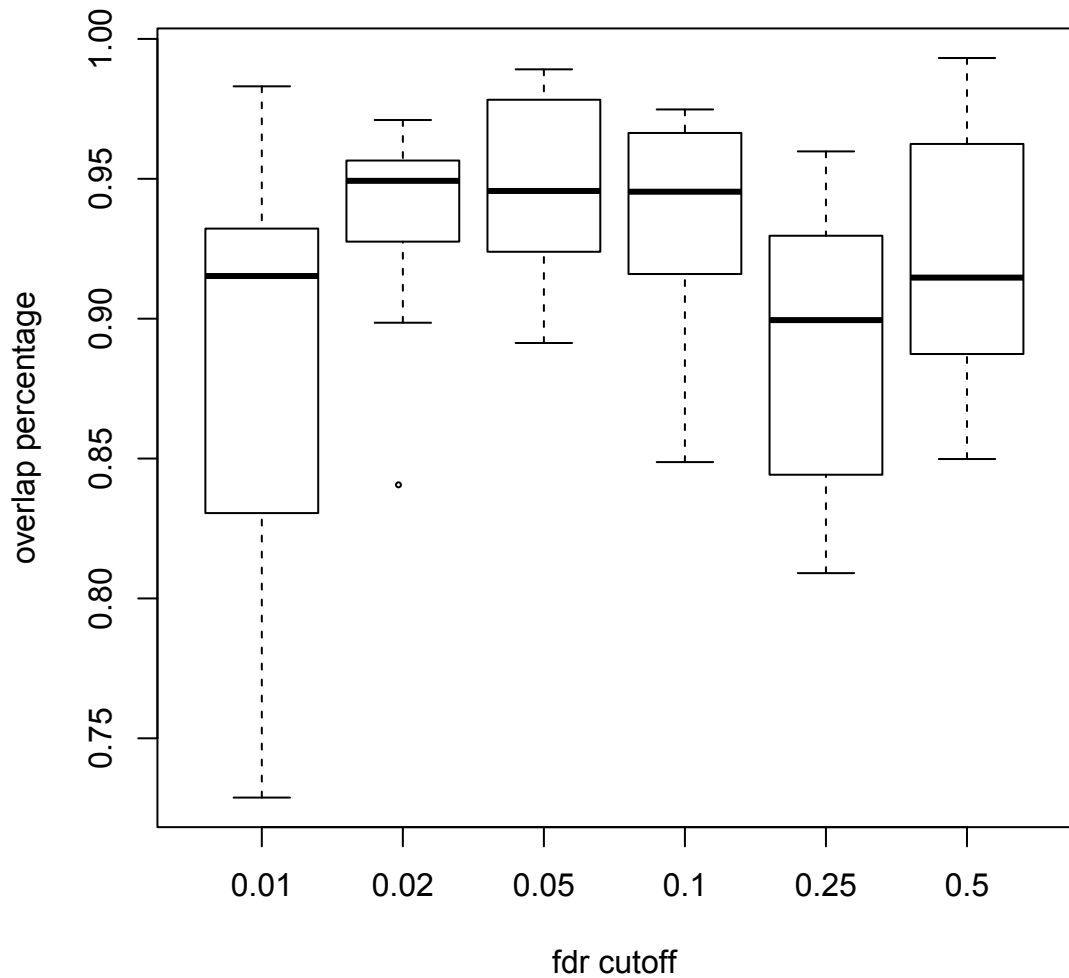

### fdr correlation for 10-time 80% sample permutations

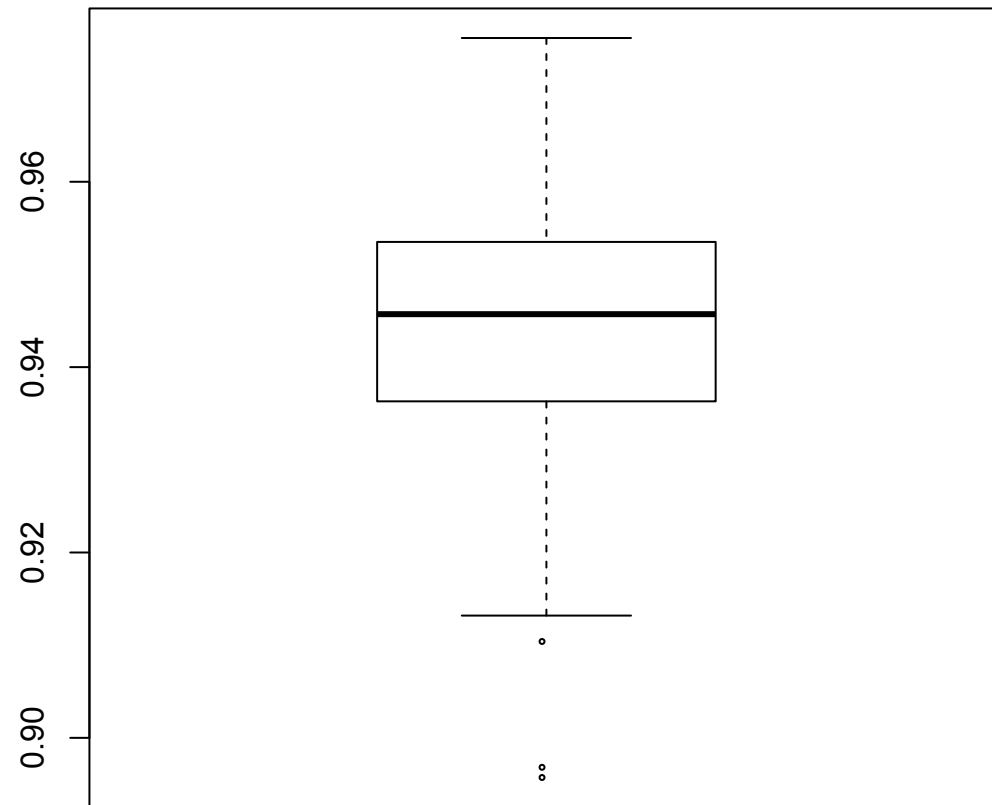

Supplement: c3mb25506a.pdf [file c3mb25506a.pdf]
