# Supplementary material for: Inferring pathway crosstalk networks using gene set co-expression signatures
Source: Royal Society of Chemistry journal article supplement (doi:10.1039/c3mb25506a), 2013-03-21
Supplement: c3mb25506a.xlsx [file c3mb25506a.xlsx]

## Sheet: geneset_pathways
hsa04664	Fc epsilon RI signaling pathway	10000	100137049	10451	123745	1432	1437	207	208	2205	2206	2207	23533	2534	26279	27040	2885	30814	3265	3562	3565	3567	3596	3635	3845	391013	3937	4067	4893	50487	5163	5290	5291	5293	5294	5295	5296	5319	5320	5321	5322	5335	5336	5578	5579	5580	5581	5594	5595
hsa04620	Toll-like receptor signaling pathway	10000	10333	10454	114609	1147	1326	1432	148022	1513	207	208	23118	2353	23533	23643	29110	3439	3440	3441	3442	3443	3444	3445	3446	3447	3448	3449	3451	3452	3454	3455	3456	353376	3551	3553	3569	3576	3592	3593	3627	3654	3661	3663	3665	3725	3929	4283	4615
hsa04150	mTOR signaling pathway	10000	1975	1977	1978	207	208	2277	23533	2475	253260	253314	25989	27330	3091	3479	3630	5170	51719	5228	5290	5291	5293	5294	5295	5296	54541	5562	5563	5594	5595	57521	6009	6194	6195	6196	6197	6198	6199	64223	673	6794	7248	7249	7422	7423	7424	81617	8408
hsa04110	Cell cycle	1017	1019	1021	1022	1026	1027	10274	1028	1029	1030	1031	1032	10393	10459	10735	10744	10912	10926	10971	1111	11200	1387	1647	1869	1870	1871	1874	1875	2033	23594	23595	246184	25	25847	27127	2810	2932	29882	29945	3065	3066	4085	4087	4088	4089	4171	4172	4173
hsa04115	p53 signaling pathway	1017	1019	1021	1026	1029	10912	1111	11200	143686	1643	1647	25898	27113	27244	2810	317	3479	3486	355	3732	4193	4194	4616	472	50484	5054	51246	51512	5268	5366	54205	545	55240	55367	56475	5728	575	581	595	6241	637	63970	64065	64326	64393	6477	651610	7057
hsa04621	NOD-like receptor signaling pathway	10392	10454	10910	114548	1147	1432	22861	22900	23118	257397	260434	29108	2919	2920	329	330	331	3320	3326	3551	3553	3569	3576	3606	4210	4671	4790	4792	4793	55914	5594	5595	5599	5600	5601	5602	5603	58484	59082	5970	6300	6347	6352	6354	6355	6356	6357	64127
hsa04912	GnRH signaling pathway	100137049	107	10746	108	1081	109	111	112	113	114	115	123745	1432	163688	1839	1956	196883	2002	2185	23236	2488	26279	2767	2776	2778	2796	2797	2798	2885	30814	3265	3708	3709	3710	3725	3845	391013	3972	4214	4215	4216	4313	4323	468	4893	50487	51806	5319
hsa04510	Focal adhesion	10000	10298	10319	103910	10398	10451	10627	1101	1277	1278	1280	1281	1282	1284	1286	1288	1289	1290	1291	1292	1293	1301	1302	1311	131873	1398	1399	1499	1729	1793	1950	1956	2002	2064	207	208	2277	22798	22801	2316	2317	2318	2321	2324	2335	23396	23533	2534
hsa04622	RIG-I-like receptor signaling pathway	10010	1147	1432	1540	1654	23586	26007	29110	338376	340061	3439	3440	3441	3442	3443	3444	3445	3446	3447	3448	3449	3451	3452	3456	3467	3551	3576	3592	3593	3627	3661	3665	4214	4790	4792	4793	5300	54941	55593	5599	5600	5601	5602	5603	56832	57506	5970	6300
hsa04350	TGF-beta signaling pathway	1030	10468	10637	130399	1311	1387	151449	1634	1874	1875	2033	268	269	3397	3398	3399	3400	3458	353500	3624	3625	3626	387	392255	4052	4086	4087	4088	4089	4090	4091	4092	4093	4609	4838	5308	5515	5516	5518	5519	5594	5595	57154	5933	5934	6093	6198	6199
hsa04310	Wnt signaling pathway	10023	10297	10725	11197	11211	11261	122011	1387	144165	1452	1454	1457	1459	1460	1487	1488	1499	166336	1855	1856	1857	2033	22943	23002	23236	23291	23401	23500	2535	27101	27121	27123	2932	324	3725	387	4040	4041	4087	4088	4089	4316	4609	4772	4773	4775	4776	51176
hsa04370	VEGF signaling pathway	10000	100137049	10725	11261	123745	1432	207	208	23533	25759	26279	30814	3265	3315	3791	3845	391013	4772	4773	4775	4776	4846	4893	50487	5290	5291	5293	5294	5295	5296	5319	5320	5321	5322	5335	5336	5530	5532	5533	5534	5535	5578	5579	5582	5594	5595	5600	5603
hsa04910	Insulin signaling pathway	10000	10211	10580	10603	10891	122809	1398	1399	163688	1977	1978	2002	207	208	2194	2203	2308	2319	23265	23433	23533	23624	2475	253314	2538	25759	2645	2872	2885	2889	2932	2997	2998	3098	3099	31	3101	32	3265	3551	3630	3635	3643	3667	369	3845	3991	399694
hsa04514	Cell adhesion molecules (CAMs)	1000	1001	100133583	1002	100294318	1003	1013	10666	10686	1272	1364	1365	1366	137075	1462	1493	149461	214	22871	23114	23308	23562	23705	24146	257194	25945	26047	26285	2734	29126	29851	3105	3106	3107	3108	3109	3111	3112	3113	3115	3117	3118	3119	3122	3123	3125	3126	3127
hsa04010	MAPK signaling pathway	10000	100137049	10125	10235	10368	10369	10454	10746	10912	11072	11184	11221	11261	1147	115727	123745	1326	1386	1398	1399	1432	1616	1647	1649	1843	1844	1845	1846	1847	1848	1849	1850	1852	1950	1956	2002	2005	207	208	2122	2246	2247	2248	2249	2250	2251	2252	2253
hsa04060	Cytokine-cytokine receptor interaction	10344	10563	10663	10673	10803	10850	10913	11009	115650	116379	1230	1232	1233	1234	1235	1236	1237	1270	1271	1435	1436	1437	1438	1439	1440	1441	1489	149233	1524	163702	1896	1950	1956	2056	2057	2277	2321	2322	2323	2324	23495	23529	23765	268	2688	2689	269	2690
hsa04210	Apoptosis	10000	11213	11261	1147	1439	1676	1677	2021	207	208	23052	23533	317	329	330	331	355	3551	3552	3553	3554	3556	356	3562	3563	3654	3656	4615	472	4790	4792	4803	4914	51135	5290	5291	5293	5294	5295	5296	54205	5530	5532	5533	5534	5535	5566	5567
hsa04920	Adipocytokine signaling pathway	10000	10645	10891	1147	126129	1374	1375	181	207	208	2180	2181	2182	23305	2475	2538	32	3551	3667	3717	3952	3953	4790	4792	4793	4794	4852	5105	5106	51094	51422	51703	53632	5443	5465	5562	5563	5564	5565	5571	5588	5599	5601	5602	5781	57818	5970	6256
hsa04012	ErbB signaling pathway	10000	1026	1027	10298	10718	1398	1399	145957	1839	1950	1956	1978	2002	2064	2065	2066	2069	207	208	23533	23624	2475	25	2549	25759	27	2885	2932	3084	3265	369	3725	374	3845	399694	4609	4690	4893	5058	5062	5063	5290	5291	5293	5294	5295	5296	5335
hsa04330	Notch signaling pathway	10683	11317	113878	1387	1487	1488	151636	171558	182	1840	1855	1856	1857	196403	2033	22938	23220	23385	2648	28514	3065	3066	3280	3516	3714	388585	3955	4242	4851	4853	4854	4855	51107	54567	55534	55851	5663	5664	5986	6868	84441	8650	8850	9253	9541	9612	9794
hsa04660	T cell receptor signaling pathway	10000	10125	1019	10298	10451	10725	10892	11261	1147	1326	1432	1437	1493	1739	207	208	2353	23533	23624	2534	27040	2885	2932	29851	3265	3458	3551	3558	3565	3567	3586	3702	3725	3845	387	3932	3937	4690	4772	4773	4775	4776	4790	4792	4793	4794	4893	5058
hsa04512	ECM-receptor interaction	10319	1101	1277	1278	1280	1281	1282	1284	1286	1288	1289	1290	1291	1292	1293	1301	1302	1311	131873	1605	22798	22801	22987	2335	2811	2812	2814	2815	284217	3161	3339	3371	3381	3655	3672	3673	3674	3675	3676	3678	3679	3680	3685	3688	3690	3691	3693	3694
hsa04662	B cell receptor signaling pathway	10000	10451	10725	10892	11025	11261	1147	118788	1380	207	208	2213	2353	23533	25780	27071	2885	2932	29760	3265	3551	3635	3725	3845	4067	4772	4773	4775	4776	4790	4792	4793	4794	4893	5290	5291	5293	5294	5295	5296	5336	5530	5532	5533	5534	5535	5579	5594
hsa04062	Chemokine signaling pathway	10000	10235	10344	10451	10563	10663	10681	107	108	10803	10850	109	111	112	113	114	1147	115	1230	1232	1233	1234	1235	1236	1237	131890	1398	1399	1445	1524	156	157	1794	196883	207	208	2185	2268	2309	23236	23533	25759	26230	2770	2771	2773	2782	2783
hsa04340	Hedgehog signaling pathway	122011	1452	1453	1454	1455	1456	23291	2619	27148	2735	2736	2737	2932	353500	3549	4036	50846	51384	51684	51715	53944	54361	5566	5567	5568	5613	5727	64399	6469	650	652	653	654	655	656	6608	7471	7472	7473	7474	7475	7476	7477	7478	7479	7480	7481	7482
hsa04020	Calcium signaling pathway	107	108	10800	109	11261	1128	1129	113	113026	1131	1133	1139	114	115	135	136	146	147	148	153	154	155	163688	1812	1816	185	1909	1910	1956	196883	2064	2065	2066	2149	2185	22953	23236	2767	2769	2774	2776	2778	2902	2903	2905	2906	291	2911
hsa04070	Phosphatidylinositol signaling system	1040	10423	113026	1606	1607	1608	160851	1609	163688	200576	23236	23396	23533	27124	3612	3613	3628	3631	3632	3633	3635	3636	3705	3706	3707	3708	3709	3710	4952	51196	51763	51806	5286	5287	5288	5289	5290	5291	5293	5294	5295	5296	5297	5298	5305	5330	5331	5332
hsa03320	PPAR signaling pathway	10062	10580	10998	10999	11001	116519	126129	1374	1375	1376	1579	1581	1582	1593	1622	1962	2167	2168	2169	2170	2171	2172	2173	2180	2181	2182	23305	2710	2712	284541	28965	30	3158	33	335	336	34	345	3611	364	376497	4023	4199	4312	4973	51	5105	5106
hsa04630	Jak-STAT signaling pathway	10000	10251	10252	10253	10254	10379	10401	11009	1154	116379	122809	1270	1271	1387	1437	1438	1439	1440	1441	1442	1489	149233	161742	163702	200734	2033	2056	2057	207	208	23529	23533	23624	2688	2689	2690	282616	282617	282618	2885	29949	30837	338376	3439	3440	3441	3442	3443
[truncated: 219 more columns]

## Sheet: PPI
5298	8867	kegg
221	8639	kegg
874	80142	kegg
9063	7341	hprd
2934	71	hprd
5147	6009	hprd
1234	11230	hprd
10758	7189	hprd
7450	1277	hprd
6716	54579	kegg
51684	55663	hprd
5469	3164	hprd
10320	22806	hprd
6424	80326	kegg
23281	79027	hprd
3984	1072	hprd,kegg
5175	1445	hprd
5594	3932	hprd
3680	284217	kegg
80233	2187	hprd
2192	2006	hprd
652788	5879	kegg
5586	5783	hprd
1557	30814	kegg
1003	3791	hprd
81704	57381	hprd
92610	27111	hprd
10419	4129	kegg
9350	7471	kegg
5271	2147	hprd
5295	5331	kegg
638	597	hprd
5504	84687	hprd
3688	83660	kegg
3655	7058	kegg
10919	26148	hprd
5590	3265	hprd
221357	1555	kegg
3696	5649	kegg
2247	6382	hprd
128	501	kegg
7082	1499	kegg
3030	80339	kegg
11030	129807	hprd
1399	3680	kegg
4214	3551	kegg
3675	2316	kegg
8394	5286	kegg
5571	6513	kegg
5618	3718	kegg
1890	100	kegg
133121	5321	kegg
8654	836	hprd
57448	836	hprd
801	23236	kegg
1486	3101	kegg
3455	7297	hprd,kegg
163688	5534	kegg
387082	6772	hprd
4690	6237	hprd
3294	10720	kegg
2139	63948	hprd
1258	9635	kegg
8775	6804	hprd
4893	8877	kegg
8655	2752	hprd
7520	54386	hprd
5764	5515	hprd
1292	6383	kegg
8654	2766	kegg
3676	58494	kegg
8976	6453	hprd
10554	8525	kegg
2534	1945	kegg
2737	7483	kegg
658	57111	hprd
3732	821	hprd
54665	5566	hprd
24137	8458	hprd
9406	6625	hprd
23761	30814	kegg
6310	7791	hprd
3032	10998	kegg
7106	4179	hprd
8514	3737	hprd
1956	7846	hprd
5260	5500	kegg
7042	2022	hprd
1562	5322	kegg
8649	5595	hprd,kegg
1020	5604	hprd
54658	1588	kegg
3908	3921	hprd
27092	10125	kegg
223	1962	kegg
3675	88	kegg
146	2776	kegg
8828	6405	hprd
6263	8912	kegg
7083	1026	hprd
4089	2737	hprd
7417	54205	hprd
3691	3912	kegg
5549	1280	hprd
1441	3718	kegg
10555	1040	kegg
7052	6678	hprd
1288	3674	kegg
7184	367	kegg
9794	11317	kegg
6655	2261	kegg
3696	1280	kegg
22899	2043	hprd
8048	4654	hprd
4036	3549	kegg
22978	5152	kegg
5998	2099	hprd
8161	79873	hprd
57405	10403	hprd
9615	3251	kegg
5903	5901	hprd
7046	1191	hprd
51060	2678	kegg
249	10973	kegg
5645	6590	hprd
1457	7421	hprd
2873	3705	hprd
5519	8313	kegg
3688	1280	kegg
5743	81579	kegg
84265	956	kegg
7314	4591	hprd
56623	200576	kegg
5582	22800	kegg
8907	127557	hprd
2316	6462	hprd
2596	801	hprd
7421	6772	hprd
84651	2038	hprd
6195	1051	hprd
7917	9869	hprd
4776	7534	hprd
5438	954	kegg
8263	3064	hprd
137872	7367	kegg
143425	7442	hprd
5333	5899	hprd
3934	4318	hprd
956	5427	kegg
25	58	hprd
57486	4922	hprd
3630	776	kegg
1644	51451	kegg
10105	7416	hprd
1910	2767	hprd,kegg
5579	81579	kegg
9564	1464	hprd
3688	1291	kegg
222389	9491	hprd
3257	89781	hprd
9970	5469	hprd
841	10134	hprd
3358	2769	kegg
11030	23543	hprd
114928	3363	hprd
27086	1487	hprd
10297	8313	kegg
6002	5605	hprd
8260	3091	hprd
3693	1290	kegg
10622	1503	kegg
8878	5590	hprd
7223	3710	hprd
4150	1630	hprd
28514	4851	hprd,kegg
5478	6829	hprd
9533	113	kegg
4188	286301	hprd
5934	1870	kegg
5241	79004	hprd
11113	27185	hprd
7057	1991	hprd
5580	5290	hprd
27134	137075	kegg
8622	271	kegg
55250	3717	hprd
2287	1459	hprd
113451	2729	kegg
1660	10482	hprd
9133	51343	kegg
10401	6774	hprd,kegg
8029	213	hprd
5062	85366	kegg
4632	59	hprd
3983	10241	hprd
9699	9545	hprd
9266	23545	hprd
3337	3303	hprd
5469	2625	hprd
204	51251	kegg
1610	2731	kegg
898	1870	kegg
55742	5829	hprd
2011	4215	hprd
164	55435	hprd
8503	3630	kegg
1581	6258	kegg
990	5523	hprd
221357	29785	kegg
5682	5347	hprd
2321	5154	kegg
5578	4067	kegg
2665	4218	hprd
4175	84289	hprd
3983	71	hprd
6197	3479	kegg
3091	2033	hprd,kegg
80227	5700	hprd
641	8243	hprd
5901	64750	hprd
1213	408	hprd
8521	10014	hprd
9146	23265	hprd
8516	83660	kegg
10617	56259	hprd
6351	2353	kegg
3672	1311	kegg
3611	10000	kegg
3357	2769	kegg
1397	5783	hprd
5611	5610	hprd
9462	7532	hprd
5295	1139	hprd
4609	1021	kegg
29760	973	hprd
23162	5609	hprd,kegg
5290	3630	kegg
9475	8394	kegg
335	8794	hprd
5467	51176	kegg
23305	6256	kegg
9869	8761	hprd
6690	2006	hprd
122953	8850	hprd
8668	7048	hprd
640	973	hprd
4591	54840	hprd
5313	196883	kegg
7475	8326	kegg
9804	79577	hprd
6452	7535	hprd
2146	80349	hprd
1019	5933	hprd,kegg
8663	8666	hprd
163688	5506	kegg
6482	2524	kegg
55257	64769	hprd
5567	64764	kegg
113026	8871	kegg
112574	6654	hprd
2335	4089	hprd
1280	6385	kegg
6783	54659	kegg
2534	867	hprd,kegg
55090	9968	hprd
5293	1398	kegg
11345	9527	hprd
1282	6291	hprd
958	330	hprd
10369	10235	kegg
5049	25842	hprd
4800	10513	hprd
58	6709	hprd
55660	51186	hprd
3679	1292	kegg
314	6303	kegg
2064	4582	hprd
11187	1823	hprd
10686	7082	hprd,kegg
5293	3562	hprd
5300	56893	hprd
5549	4811	hprd
5914	23054	hprd
4286	6195	hprd
914	966	hprd
51295	57154	hprd
9638	6602	hprd
9950	5861	hprd
1282	6288	hprd
6016	5900	hprd
4188	168417	hprd
836	4780	hprd
5580	119	hprd
2534	9846	kegg
9328	9329	hprd
207	2475	hprd,kegg
2885	8660	hprd,kegg
5207	3098	kegg
5931	672	hprd
11185	10196	kegg
249	254552	kegg
10901	9536	kegg
8562	28985	hprd
55832	8454	hprd
22927	10210	hprd
1278	9672	kegg
2886	2885	hprd
55755	20	hprd
5111	1647	hprd,kegg
826	9551	hprd
6714	945	hprd
51100	3064	hprd
7529	23367	hprd
5578	490	hprd
5337	160851	kegg
8324	56893	hprd
4791	1147	hprd,kegg
23114	6386	hprd
4862	8850	hprd
5549	2335	hprd
116449	3937	hprd
51529	10393	hprd,kegg
10763	8851	hprd
6498	2752	hprd
1387	2908	hprd
10093	1729	kegg
10588	4522	kegg
7068	9318	hprd
4267	56893	hprd
2880	246	kegg
10969	2248	hprd
2081	3309	hprd
6196	3479	kegg
4097	84060	hprd
3479	3480	hprd,kegg
3101	5236	kegg
8833	5144	kegg
4907	54981	kegg
5433	3000	kegg
6655	10125	kegg
50944	6196	hprd
5431	1503	kegg
5333	5289	kegg
3838	84060	hprd
4776	10971	hprd
23057	952	kegg
22859	6098	hprd
7158	4790	hprd
114049	23498	kegg
2290	4087	hprd
5347	7178	hprd
3693	23022	hprd
810	3707	kegg
3276	56252	hprd
3620	4128	kegg
3162	644	kegg
10114	5998	hprd
6783	51144	kegg
3937	2885	hprd,kegg
27430	54496	kegg
55660	26993	hprd
10946	11007	hprd
9306	5296	hprd
7534	3480	hprd
956	23649	kegg
6453	55052	hprd
9295	6427	hprd
9093	3717	hprd
4869	1647	hprd
5500	2997	kegg
23562	9414	kegg
8470	5058	hprd
752	5216	hprd
6517	1072	hprd
5295	5584	kegg
84296	51659	hprd
3672	1280	kegg
8503	3635	kegg
5148	1633	kegg
59348	672	hprd
3183	7329	hprd
2159	5269	hprd
2902	4627	hprd
1875	4088	hprd,kegg
3675	7094	kegg
5591	6722	hprd
4005	6772	hprd
2	55729	hprd
7043	4052	kegg
10621	112840	hprd
30833	2766	kegg
7410	960	hprd
3866	27229	hprd
2130	4591	hprd
3066	6670	hprd
658	55120	hprd
1950	2885	hprd
834	3064	hprd
26508	6498	hprd
4898	5443	hprd
2661	5873	hprd
109	5152	kegg
5921	6464	hprd
5000	595	hprd
10254	3717	hprd,kegg
6667	54880	hprd
2875	16	kegg
2035	28992	hprd
57678	55750	kegg
5291	2322	kegg
9655	3561	kegg
4686	9810	hprd
1855	1857	hprd
3759	3761	hprd
7277	4609	hprd
6895	8575	hprd
55217	28972	kegg
8613	55627	kegg
36	1962	kegg
23559	4734	hprd
2147	2150	hprd
840	4149	hprd
23534	6426	hprd
8841	5531	hprd
10580	3643	hprd
2805	1491	kegg
3320	6774	hprd
4609	6667	hprd
26289	27115	kegg
5579	3689	hprd
5708	5711	hprd
988	4998	hprd
1857	5494	hprd
919	2215	kegg
9869	199745	hprd
6258	4973	kegg
5305	8867	kegg
4145	4914	hprd
159	55157	kegg
91	3547	hprd
7812	10492	hprd
5431	109	kegg
1215	4254	hprd
10893	3814	hprd
55075	1951	hprd
5045	4851	hprd
10718	2066	hprd,kegg
955	159	kegg
8777	1366	kegg
3716	6772	hprd,kegg
4005	4087	hprd
114	2771	kegg
7704	9734	hprd
115	5144	kegg
5330	5532	kegg
29911	27332	hprd
2736	7483	kegg
71	4627	kegg
11260	8021	hprd
10498	23637	hprd
8515	2316	kegg
23236	4952	kegg
6908	284403	hprd
302	998	hprd
5322	1558	kegg
22801	83660	kegg
722	325	hprd
11128	50808	kegg
5966	4793	hprd
71	3692	hprd
404665	7940	hprd
54464	22948	hprd
6046	121504	hprd
1017	898	hprd
6257	1593	kegg
54972	2932	hprd
10567	79666	hprd
4036	7276	hprd
83985	598	hprd
22978	5137	kegg
7013	472	hprd
124	54658	kegg
658	65264	hprd
6850	3601	hprd
1719	10841	kegg
140890	3178	hprd
51100	274	hprd
51160	7311	hprd
207	1978	hprd
3603	2906	hprd
1457	4792	hprd
71	9414	kegg
166336	57216	kegg
1107	10808	hprd
64344	3091	hprd
468	2963	hprd
6256	51	kegg
4088	11018	hprd
2932	1385	hprd,kegg
2534	2319	hprd
3059	10097	hprd
7158	121504	hprd
163688	5256	kegg
957	8654	kegg
2784	5330	kegg
11060	1605	hprd
5340	2152	hprd
4284	801	hprd
3597	3566	hprd
192134	11226	kegg
8841	5467	hprd
2886	3815	hprd
4615	3665	hprd
23474	84966	hprd
3866	11170	hprd
56674	57062	hprd
131	7367	kegg
4790	8837	hprd
3066	5757	hprd
54458	83755	hprd
4318	1277	hprd
5728	5297	kegg
1742	57502	hprd
1854	5467	hprd
1031	894	kegg
6423	7477	kegg
387082	11171	hprd
4323	3814	hprd
54490	1555	kegg
1051	1958	hprd
7479	7855	kegg
598	1409	hprd
22862	3695	kegg
27232	60491	hprd
5925	672	hprd
3613	10423	kegg
5430	10201	kegg
5290	7297	kegg
3693	3914	kegg
23054	142	hprd
6759	3091	hprd
1019	1026	hprd,kegg
596	1432	hprd
4351	5209	kegg
1511	7852	hprd
207	6416	hprd,kegg
51433	51529	kegg
4088	1028	kegg
8321	1742	hprd
983	4000	hprd
2572	2746	kegg
56994	81579	kegg
5594	3643	kegg
957	139596	kegg
3445	10197	kegg
9570	375	hprd
113451	384	kegg
3676	64098	kegg
10127	51324	hprd
3689	83700	kegg
23533	6714	kegg
79699	6921	hprd
5144	271	kegg
948	2534	hprd
5708	7132	hprd
23090	142	hprd
7479	8322	kegg
6777	9612	hprd
5290	8871	kegg
2264	6772	hprd
398	399	hprd
3687	718	hprd
1805	7917	hprd
55165	10142	hprd
91227	2730	kegg
22801	3908	kegg
11073	5371	hprd
5566	158798	hprd
246	1562	kegg
8777	10686	kegg
51133	51691	hprd
221	137872	kegg
333	7114	hprd
10800	9630	kegg
89780	6259	hprd
6356	7167	hprd
2786	2784	hprd
316	4129	kegg
10678	2651	kegg
23592	4086	hprd
5174	949	hprd
91662	29108	hprd
147179	7454	hprd
369	22808	kegg
5351	79813	kegg
891	51434	kegg
956	5136	kegg
5579	4950	hprd
2314	4615	hprd
5330	7855	kegg
7529	8660	hprd
5970	10000	kegg
5438	5315	kegg
10891	4691	hprd
6714	5879	kegg
30837	6774	kegg
26750	5089	hprd
84735	10196	kegg
9583	5137	kegg
3692	10240	hprd
7043	7044	kegg
5321	2770	kegg
55743	5371	hprd
4067	5580	hprd
54600	131965	kegg
10456	10971	hprd
9252	5970	hprd
2261	2259	kegg
5433	2984	kegg
6885	55437	hprd
6667	9612	hprd
56288	998	hprd
825	54550	hprd
10342	54622	hprd
3688	89	kegg
55798	4128	kegg
1573	2879	kegg
8856	10891	hprd
2539	9563	kegg
2551	3054	hprd
824	8851	hprd
84076	6888	kegg
6627	6629	hprd
50487	2771	kegg
79760	6628	hprd
2870	6915	hprd
113026	5296	kegg
4738	8450	hprd
367	836	hprd
58529	11155	hprd
10667	5053	kegg
7525	3717	hprd
3915	3685	kegg
6850	930	hprd
51478	54658	kegg
9021	3568	kegg
84448	5880	kegg
282991	63915	hprd
59277	54507	hprd
8991	26073	hprd
3312	10474	hprd
5440	2982	kegg
4197	3065	hprd
7332	5071	hprd
4893	10125	kegg
5562	1080	hprd
5000	4172	hprd,kegg
2949	2686	kegg
5330	8323	kegg
805	5260	kegg
5499	6500	hprd
7520	4999	hprd
4149	79666	hprd
7429	58	hprd
5218	57154	hprd
387	5908	kegg
6850	5336	hprd,kegg
3189	7276	hprd
9482	57617	hprd
2984	5141	kegg
54464	51079	hprd
103910	4660	kegg
223	6472	kegg
58529	2318	hprd
8887	7128	hprd
5426	5111	hprd
2990	54659	kegg
5702	7189	hprd
7920	518	hprd
1368	1950	hprd
710	5327	hprd
30833	270	kegg
9491	125170	hprd
983	54820	hprd
80306	2885	hprd
1814	1933	hprd
6774	5371	hprd
3672	1277	kegg
27289	5362	kegg
5578	387	hprd,kegg
8318	1026	hprd
1857	8312	hprd,kegg
1387	29946	hprd
915	926	hprd
9638	27336	hprd
5293	22913	hprd
3192	4692	hprd
2887	1956	hprd
6310	115572	hprd
5257	5506	kegg
84446	3303	hprd
5728	23139	hprd
240	5319	kegg
7431	4122	hprd
5566	324	hprd
3560	6850	hprd
122809	3595	kegg
182	4851	hprd,kegg
387082	3191	hprd
355	55791	hprd
23659	26279	kegg
8399	1571	kegg
407	5724	hprd
6262	5023	kegg
6470	501	kegg
7409	5879	hprd,kegg
9124	9489	hprd
8818	5277	hprd
11128	113	kegg
8450	367	hprd
7311	7251	hprd
7372	10602	hprd
1080	5576	hprd
80854	6879	hprd
6093	387	hprd,kegg
3655	3381	kegg
57530	50848	hprd
2534	3265	hprd
2246	1460	hprd
836	5757	hprd
6498	7329	hprd
3717	5336	hprd
916	5295	hprd
719	718	hprd,kegg
1032	595	kegg
5625	51056	kegg
129685	6877	hprd
10744	991	kegg
3633	113026	kegg
5170	5566	hprd
1915	5432	hprd
54578	51451	kegg
5296	8651	hprd
8835	1271	kegg
1292	3696	kegg
5600	5801	kegg
1457	8893	hprd
2249	5156	kegg
3673	131873	kegg
10605	1973	hprd
83999	22943	hprd
1109	54578	kegg
6955	919	hprd
8038	29763	hprd
2944	1544	kegg
1258	801	kegg
5272	55660	hprd
10398	5501	kegg
2101	1130	hprd
781	10125	kegg
1937	7532	hprd
1457	3320	hprd
9583	5143	kegg
659	652	hprd
10539	54507	hprd
3621	7533	hprd
93408	4660	kegg
810	5535	kegg
805	2904	kegg
1791	5111	hprd
1017	9738	hprd
5993	3066	hprd
2099	4089	hprd
2526	8702	kegg
10524	891	hprd
5293	7535	kegg
9021	149233	kegg
2736	1452	kegg
5468	85441	hprd
2150	867	hprd
818	1390	hprd
3170	3202	hprd
4478	7430	hprd
7220	2890	hprd
2643	2068	kegg
11007	55816	hprd
80145	60491	hprd
7164	7534	hprd
23355	4093	hprd
1147	10010	hprd
867	83737	hprd
23139	7189	hprd
5875	659	hprd
5634	84076	kegg
111	4830	kegg
9704	23649	hprd
10423	8503	kegg
9567	4035	hprd
545	63967	hprd
2953	1544	kegg
7364	51409	kegg
857	3611	hprd
3953	3717	hprd,kegg
126326	7976	hprd
1452	8313	kegg
6310	11069	hprd
122809	6778	kegg
6693	1499	hprd
1609	9388	kegg
3678	83660	kegg
3725	2099	hprd
11098	57489	hprd
9618	10295	hprd
10111	4361	hprd
54658	10196	kegg
8669	51280	hprd
51144	54578	kegg
4690	1815	hprd
107	2773	kegg
8663	1964	hprd
3172	7157	hprd
56896	1809	hprd
93034	978	kegg
56924	5880	kegg
10449	27034	kegg
10813	29911	hprd
2950	91227	kegg
367	23028	hprd
1022	4176	hprd
2643	23517	kegg
2736	353500	kegg
1315	375	hprd
2591	56913	kegg
1399	3695	kegg
2982	5150	kegg
9802	9372	hprd
6772	7424	kegg
29959	81628	hprd
4853	196403	kegg
1741	493	hprd
5359	115817	hprd
125	224	kegg
5687	5683	hprd
10554	8760	kegg
3694	3913	kegg
4090	2316	hprd
5499	8165	hprd
4616	1026	hprd
10401	5970	hprd
1644	121278	kegg
5210	5211	kegg
9743	1000	hprd
23594	4171	hprd,kegg
11200	4683	hprd
7531	6310	hprd
8313	1499	hprd,kegg
2902	11113	hprd
4067	59341	hprd
10116	9856	hprd
373	9883	hprd
79666	10313	hprd
196883	5143	kegg
10467	1432	hprd
1606	8513	kegg
51166	57665	kegg
79571	51421	hprd
10623	9329	hprd
6249	2475	hprd
64682	29882	kegg
11153	3064	hprd
9564	3693	kegg
81620	5111	hprd
9446	1937	hprd
5129	11007	hprd
7298	3704	kegg
2597	5223	kegg
55165	5347	hprd
83983	3312	hprd
1387	4602	hprd
196	7025	hprd
9900	3912	kegg
55703	956	kegg
5465	1376	kegg
6196	3630	kegg
57178	367	hprd
5296	3845	kegg
2523	2528	kegg
8945	4791	hprd
3685	84624	kegg
9001	79101	hprd
56898	5019	kegg
2280	3708	hprd
840	329	hprd,kegg
2114	5595	kegg
9743	1742	hprd
1326	4790	hprd
10398	79784	kegg
8515	3688	hprd
1438	3716	kegg
23028	23186	hprd
8328	8425	hprd
2130	6160	hprd
8500	23085	hprd
6402	6404	hprd
1111	3320	hprd
953	10714	kegg
138429	8394	hprd
5600	84867	kegg
2941	257202	kegg
4088	3172	hprd
2583	8705	kegg
1877	10919	hprd
3265	2770	kegg
5801	5598	hprd
2705	6714	hprd
10399	3560	hprd
8900	4605	hprd
5859	5471	kegg
126	7367	kegg
1282	3685	kegg
79843	11007	hprd
5764	55755	hprd
50940	270	kegg
2939	2937	kegg
7535	203068	hprd
51742	25942	hprd
6885	3551	hprd,kegg
5568	112	kegg
11340	7538	hprd
5431	318	kegg
11007	9055	hprd
5293	3630	kegg
3636	89869	kegg
3695	55742	kegg
10987	7345	hprd
5707	573	hprd
27044	6778	hprd
672	4088	hprd
7482	2535	kegg
30008	117144	hprd
3074	53947	kegg
5347	9055	hprd
4854	5664	hprd,kegg
3775	29843	hprd
54902	65109	hprd
5457	2130	hprd
160	114034	hprd
145226	4129	kegg
51535	838	hprd
6778	9063	kegg
7874	7185	hprd
2932	5747	hprd
54658	131965	kegg
7532	7074	hprd
5601	8471	kegg
57670	50618	hprd
10482	55998	hprd
586	7407	kegg
4093	667	hprd
27294	29785	kegg
23382	55798	kegg
57498	1399	hprd
5159	56034	kegg
1385	11161	hprd
6857	10399	hprd
11171	4092	hprd
8826	5566	hprd
11161	64978	hprd
8725	55929	hprd
1373	5894	hprd
161882	2624	hprd
8888	51259	hprd
340205	5777	hprd
3251	51292	kegg
6500	201456	hprd
3612	5330	kegg
7409	3689	kegg
7031	56893	hprd
1557	1579	kegg
5465	6319	kegg
80739	5777	hprd
5293	3815	kegg
5601	4088	hprd
3159	5468	hprd
54014	6597	hprd
9775	4116	hprd
2532	6374	hprd
1045	1432	hprd
5747	3693	kegg
140890	6432	hprd
256933	2832	hprd
10846	270	kegg
4609	1875	kegg
5733	9630	kegg
5092	79873	hprd
4316	1404	hprd
5728	23533	kegg
955	5152	kegg
1956	808	hprd
9784	4035	hprd
93185	928	hprd
55806	3146	hprd
3996	5584	kegg
5747	5578	kegg
6464	1441	hprd
1003	1500	hprd,kegg
5296	6237	kegg
6833	775	kegg
6732	55612	hprd
84254	5563	kegg
7185	608	hprd
1946	2047	hprd
5322	1559	kegg
3938	2717	kegg
5431	2986	kegg
54535	6770	hprd
1742	7525	hprd
3694	1278	kegg
957	30833	kegg
51102	7068	hprd
3397	6929	hprd
58	345456	kegg
3696	83660	kegg
1316	10919	hprd
254887	4842	hprd
3631	5289	kegg
1387	2623	hprd
8416	56901	hprd
56956	57154	hprd
7514	1398	hprd
81	5305	kegg
71	10398	kegg
8515	1291	kegg
9975	9572	hprd
4690	57144	kegg
4338	6133	hprd
3937	6464	hprd
6241	4830	kegg
2321	4690	hprd
90627	7277	hprd
7375	5925	hprd
10020	8776	kegg
5293	2066	kegg
3284	54579	kegg
545	1111	hprd,kegg
6271	6286	hprd
2776	3356	hprd,kegg
8651	3587	kegg
2113	6672	hprd
956	7084	kegg
57605	8904	hprd
9833	5511	hprd
7532	5208	hprd
4647	58	hprd
196883	3704	kegg
57731	5799	hprd
51086	58	hprd
51497	7469	hprd
6772	6776	hprd
823	3552	hprd
27124	5331	kegg
2618	5198	kegg
1434	5536	hprd
10048	6278	hprd
27	847	hprd
5319	1571	kegg
10686	9414	kegg
27043	2908	hprd
5366	596	hprd
7478	7855	kegg
5104	7056	hprd
284541	242	kegg
50484	4831	kegg
55342	5610	hprd
7052	226	hprd
6470	219	kegg
5579	5330	kegg
1412	57658	hprd
1991	1441	hprd
5160	5313	kegg
64326	7157	hprd,kegg
93408	4638	kegg
10382	659	hprd
2354	3727	hprd
658	9943	hprd
2593	2628	kegg
774	5923	kegg
5136	51292	kegg
23761	8398	kegg
125	54657	kegg
51667	23746	hprd
10048	7345	hprd
26064	7532	hprd
10923	6872	hprd
659	722	hprd
1084	634	hprd
64750	4088	hprd
2079	10980	hprd
4089	3172	hprd
9507	12	hprd
3799	7532	hprd
79837	5332	kegg
9276	5999	hprd
2597	226	kegg
3725	2353	hprd
9166	23557	hprd
2915	2781	kegg
3692	5579	hprd
55811	5147	kegg
1387	27043	hprd
5431	10201	kegg
8328	10900	hprd
81579	1573	kegg
6310	118738	hprd
7534	23313	hprd
154	3553	hprd
957	84618	kegg
8554	1759	hprd
9463	2834	hprd
3398	4093	kegg
59341	7525	hprd
22820	11316	hprd
8085	4093	hprd
1215	1907	hprd
6421	2274	hprd
10952	338	hprd
64781	55512	kegg
2752	79666	hprd
8760	1609	kegg
259230	427	kegg
22859	1742	hprd
5330	23533	kegg
29888	79948	hprd
6189	55741	hprd
3312	8655	hprd
6263	775	kegg
4259	29785	kegg
9939	65109	hprd
3680	1290	kegg
5438	29922	kegg
890	5933	hprd
5521	5582	kegg
3690	252995	kegg
1857	7855	kegg
51100	8867	hprd
11244	580	hprd
2492	6281	hprd
6602	2353	hprd
308	1981	hprd
274	4609	hprd
4087	57559	hprd
248	2068	kegg
1937	57332	hprd
8643	3549	hprd,kegg
8560	6609	kegg
5985	84060	hprd
2353	4286	hprd
9156	4436	hprd
2873	7157	hprd
3283	54490	kegg
5584	3654	hprd
1154	5588	hprd
51652	3490	hprd
29899	2773	hprd
349565	83594	kegg
5440	56474	kegg
1984	7052	hprd
4329	3033	kegg
4110	51103	hprd
23476	55660	hprd
6881	6872	hprd
29979	961	hprd
8650	4855	kegg
857	367	hprd
10555	1606	kegg
10941	131965	kegg
387082	3312	hprd
7186	9099	hprd
51172	2060	hprd
7514	1386	hprd
5275	1508	hprd
6159	55638	hprd
240	5320	kegg
166929	130367	kegg
55703	377841	kegg
6303	27231	hprd
3597	7297	hprd,kegg
5293	4952	kegg
5616	5579	kegg
1789	8726	hprd
836	8394	hprd
3938	3101	kegg
10298	3985	kegg
4790	9618	kegg
810	4843	kegg
824	4792	hprd
5336	5156	kegg
9319	79092	hprd
3866	55388	hprd
1281	3675	kegg
7532	9493	hprd
51129	6258	kegg
51466	57556	hprd
8915	8517	hprd,kegg
9475	6780	hprd
9255	498	hprd
139596	79912	hprd
7532	2309	hprd
119391	91227	kegg
5599	1399	kegg
124583	57804	kegg
5781	2885	hprd,kegg
3768	8573	hprd
377841	107	kegg
222894	6929	hprd
5300	898	hprd
8541	8499	hprd
5805	6595	kegg
113878	4851	hprd,kegg
4092	27107	hprd
1558	5742	kegg
51144	79799	kegg
5307	4760	hprd
5137	158	kegg
7572	54925	hprd
2965	2099	hprd
920	5295	hprd
71	645126	kegg
6689	6908	hprd
5616	111	kegg
3292	7364	kegg
9146	9802	hprd
2033	8925	hprd
83394	2185	hprd
3632	5333	kegg
8614	55701	hprd
9643	1039	hprd
2805	2571	kegg
8292	590	hprd
7529	6714	hprd
7704	3065	hprd
9049	10728	hprd
79720	51160	hprd
58512	1741	hprd
57761	5970	hprd
9475	5501	kegg
4188	4034	hprd
7531	27018	hprd
471	30833	kegg
2932	4040	hprd
1600	3693	hprd
4143	1786	kegg
4853	113878	kegg
2932	3611	hprd
191	60487	kegg
1025	8454	hprd
1088	634	hprd
87	29119	kegg
6732	6625	hprd
10399	5580	hprd
6383	3371	kegg
2066	5296	hprd,kegg
5332	9162	kegg
10519	5664	hprd
6422	11211	kegg
3620	9836	kegg
29107	56001	hprd
2638	55791	hprd
5897	5896	hprd
23192	79686	hprd
5599	572	hprd
387	1729	hprd,kegg
808	91807	kegg
9025	23404	hprd
660	7133	hprd
30837	2690	kegg
4085	64682	kegg
137492	7251	hprd
9491	54715	hprd
7529	83732	hprd
6612	1050	hprd
1108	6597	hprd
3460	3442	kegg
9415	5322	kegg
247	1573	kegg
3570	3717	kegg
30837	3598	kegg
622	64064	kegg
5697	4887	hprd
3691	1308	hprd
4233	7423	kegg
2771	134	hprd
1613	1026	hprd
7994	55432	kegg
9759	7534	hprd
6569	3320	hprd
2960	2071	hprd
11276	9522	hprd
9530	339	hprd
10923	5111	hprd
7486	641	hprd
66036	51324	hprd
11072	940	hprd
26279	1576	kegg
4297	5929	hprd
59341	9053	hprd
5062	57630	hprd
114	5136	kegg
51478	54600	kegg
5777	1271	kegg
3174	6927	kegg
54512	1797	hprd
8737	6885	kegg
7060	6383	kegg
652788	8312	kegg
2185	2064	hprd
79695	4589	hprd
9026	1213	hprd
7114	60	hprd,kegg
5347	5689	hprd
5747	1793	kegg
29780	3611	hprd,kegg
84612	5584	hprd,kegg
5805	51202	kegg
373156	2877	kegg
9759	5980	hprd
1803	920	hprd
2157	2147	hprd
84914	4093	hprd
6503	919	hprd
898	993	hprd
771	3963	hprd
5427	29922	kegg
11098	347862	hprd
10445	79036	hprd
5580	1601	hprd
2538	5563	kegg
5295	7409	kegg
26260	6500	hprd
10989	29070	hprd
7750	3181	hprd
2185	5921	hprd
8558	2114	hprd
7852	10672	hprd
10846	3251	kegg
10093	10096	hprd
329	2619	hprd
2250	5159	kegg
5590	5580	hprd
4088	288	hprd
5296	5881	kegg
5175	55660	hprd
891	993	hprd
1579	1558	kegg
3613	84812	kegg
5170	6199	hprd,kegg
3835	64219	hprd
6462	6652	hprd
2941	2686	kegg
130399	3625	hprd
6714	5881	kegg
2984	5143	kegg
949	348	hprd
3694	131873	kegg
51107	5663	hprd
25885	4830	kegg
23254	5493	hprd
5777	3206	hprd
2572	220	kegg
89869	5582	kegg
5580	4323	kegg
84254	814	hprd
8470	2185	hprd
2571	1036	kegg
3990	4035	hprd
839	7020	hprd
5777	867	hprd
8328	9782	hprd
3911	4059	hprd
26258	282991	hprd
4615	55620	hprd
1609	5408	kegg
9655	1438	kegg
5291	2549	kegg
5580	5786	hprd
5394	23420	hprd
8399	64816	kegg
840	330	hprd,kegg
5013	26511	hprd
2277	3791	hprd,kegg
1104	1119	hprd
11200	5529	hprd
7186	1326	hprd
3043	3040	hprd
8651	3460	kegg
55558	1020	kegg
6872	3146	hprd
217	11112	kegg
2986	8622	kegg
60528	6015	hprd
5170	6446	hprd
5337	8611	kegg
55716	3933	hprd
4087	7592	hprd
28996	3159	hprd
5566	10488	kegg
3190	1445	hprd
9802	83459	hprd
1445	3673	kegg
3633	200576	kegg
957	5578	hprd
1729	375189	kegg
22801	7148	kegg
1857	4854	kegg
7277	4137	hprd
51593	50628	hprd
1154	5578	hprd
1630	5535	kegg
7341	8648	hprd
7040	3091	kegg
56341	23438	kegg
2735	122011	kegg
22903	5365	hprd
2033	8626	hprd
3960	22800	hprd
1111	993	hprd,kegg
8440	8312	hprd
9470	83755	hprd
8470	8867	hprd
780	1280	hprd
7414	71	kegg
55740	10152	hprd
211	27232	kegg
3598	867	kegg
23204	379	hprd
3983	83878	hprd
23522	860	hprd
8515	3915	kegg
29085	3101	kegg
81029	8321	kegg
5260	801	hprd,kegg
8120	1176	hprd
4172	5430	hprd
1282	6382	kegg
55558	2242	kegg
6382	4192	hprd
4067	1441	hprd
550	3673	hprd
5579	3845	kegg
8988	56944	hprd
8852	5577	hprd
9882	11073	hprd
5883	5111	hprd
2159	2153	hprd
119391	51060	kegg
164592	11007	hprd
27332	83755	hprd
1579	220	kegg
29945	64682	kegg
6103	7531	hprd
9630	1230	hprd
353	272	kegg
5829	3676	hprd,kegg
8826	5879	hprd,kegg
247	242	kegg
1831	4791	hprd
340485	8877	kegg
9564	3682	kegg
9094	1787	hprd
5439	2982	kegg
4356	284208	hprd
1901	5159	hprd
9869	192111	hprd
4925	4692	hprd
4208	2033	hprd
1459	1390	hprd
7704	23149	hprd
5300	891	hprd
5297	4952	kegg
60	70	hprd
9402	3815	hprd
3798	10499	hprd
4653	1158	hprd
64422	11345	hprd
1635	79959	hprd
4739	2185	hprd
5315	87178	kegg
2720	80270	kegg
5594	6622	hprd
5430	5434	hprd
92799	2885	hprd
283208	8659	kegg
122809	3601	kegg
5613	113	kegg
4653	4633	hprd
25902	10840	kegg
3444	10197	kegg
6310	23131	hprd
3294	54659	kegg
54567	4851	hprd,kegg
409	6601	hprd
8717	1612	hprd
8739	598	hprd
4300	55791	hprd
4633	4627	kegg
3672	1292	kegg
1111	7157	hprd,kegg
3676	83593	kegg
2052	1577	kegg
3174	2597	hprd
4040	8325	hprd,kegg
47	50	kegg
817	1390	hprd
30008	3087	hprd
7067	595	hprd
1387	7709	hprd
5921	3329	hprd
3337	1728	hprd
4880	4883	hprd
11261	9262	hprd
10293	7186	hprd
955	271	kegg
60	4633	kegg
5010	10099	hprd
1562	2880	kegg
5338	1608	kegg
2104	801	hprd
55048	9146	hprd
4750	546	hprd
1121	22931	hprd
7718	81576	hprd
7075	5781	hprd
10602	23433	hprd
5141	270	kegg
2159	5627	hprd
4800	1050	hprd
1457	1390	hprd
993	367	hprd
3695	1284	kegg
1131	2769	kegg
29920	51056	kegg
8498	5901	hprd
4738	123228	hprd
108	29922	kegg
1289	3675	kegg
5330	11211	kegg
2239	2247	hprd
4790	2908	hprd
957	5143	kegg
55503	801	hprd
3635	3055	hprd
2911	815	kegg
54474	79095	hprd
3000	50940	kegg
468	1054	hprd
9638	55183	hprd
3091	6667	hprd
22987	3910	kegg
6311	23424	hprd
5770	87	hprd
89869	5298	kegg
6407	5576	hprd
4615	54106	kegg
3624	92	hprd,kegg
130	7367	kegg
9810	5925	hprd
57649	3065	hprd
473	7205	hprd
2308	5105	kegg
10397	1938	hprd
10765	5925	hprd
59307	3554	hprd
203068	4134	hprd
56953	5151	kegg
55125	6462	hprd
250	10973	kegg
4609	1999	hprd
8337	7328	hprd
5292	993	hprd
4609	6908	hprd
7099	4615	hprd,kegg
2735	650	kegg
8516	7059	kegg
63940	2261	hprd
5362	5879	kegg
8777	9075	kegg
248	23517	kegg
5777	613	hprd
3676	3381	kegg
5335	805	kegg
5757	1104	hprd
5518	5906	hprd
54521	6396	hprd
599	637	hprd
441531	5230	kegg
5783	8772	hprd
3695	88	kegg
2703	4284	hprd
10270	896	hprd
2953	1576	kegg
10919	3009	hprd
948	1278	hprd
4067	1796	hprd
7366	10419	kegg
51386	8664	hprd
1022	84108	hprd
3099	7709	hprd
1496	4301	kegg
51608	337867	hprd
160851	5407	kegg
1822	5211	hprd
8554	4193	hprd
8324	260425	hprd
79083	5873	hprd
29958	635	kegg
284541	219	kegg
5582	2905	kegg
1645	1572	kegg
26292	55701	hprd
5829	4145	hprd
2986	318	kegg
55264	26128	hprd
4331	2099	hprd
6135	642	hprd
7923	54577	kegg
3866	3854	hprd
60592	400	hprd
23236	2771	kegg
9181	10381	kegg
9322	6517	kegg
1272	6900	hprd
3293	10941	kegg
5257	5836	kegg
1514	1471	hprd
6195	29904	hprd
2525	2651	kegg
8533	3689	hprd
1822	8425	hprd
9441	1024	hprd
11165	64284	hprd
6464	10603	hprd
11051	6625	hprd
23598	6047	hprd
4294	3064	hprd
4097	51003	hprd
10124	3838	hprd
2316	83478	hprd
1562	8529	kegg
56288	5584	hprd,kegg
6904	402	hprd
10449	39	kegg
187	8862	hprd
3675	3918	kegg
1509	7038	hprd
54880	8904	hprd
1263	11200	hprd
3674	3912	kegg
109	10201	kegg
5435	124583	kegg
7408	63948	hprd
4143	54496	kegg
10062	54556	hprd
5594	5319	kegg
5518	29966	hprd
4322	7078	hprd
64840	54361	hprd,kegg
91179	8578	hprd
5290	1398	kegg
127	10720	kegg
284541	1573	kegg
1956	5338	hprd
4321	2161	hprd
5743	246	kegg
836	9564	hprd
55322	51729	hprd
5306	5335	hprd
1956	10254	hprd
51703	6257	kegg
801	5506	kegg
65125	10746	hprd
5594	2623	hprd
3685	131873	kegg
51144	10941	kegg
8516	7448	hprd,kegg
11329	6285	hprd
6449	3537	hprd
116986	2036	hprd
374378	29071	kegg
983	51343	kegg
5340	2149	hprd
23085	7532	hprd
2990	10720	kegg
30	3295	kegg
4853	55851	kegg
8515	7143	kegg
2700	5582	hprd
1147	7132	hprd
57530	27134	kegg
4131	60	hprd
11252	29993	hprd
81579	2768	kegg
552	2776	kegg
8295	4149	hprd
6402	7430	hprd
5858	7042	hprd
26986	5829	hprd
367	4841	hprd
64395	2010	hprd
5473	29888	hprd
7157	2099	hprd
3676	50509	kegg
5515	5578	kegg
9712	81	hprd
51442	7004	hprd
5562	5208	hprd
2768	9138	kegg
1601	4646	hprd
10551	56893	hprd
81620	4999	hprd
8773	10590	hprd
6715	54657	kegg
7704	81576	hprd
2523	11041	kegg
1452	3183	hprd
205	5148	kegg
3442	3455	hprd,kegg
5515	2107	hprd
2130	801	hprd
5770	613	hprd
5867	10307	hprd
9869	10190	hprd
5062	2885	hprd
251	54514	kegg
30837	3568	kegg
51343	51434	kegg
55738	375	hprd
7482	8322	kegg
4175	8317	kegg
2316	7428	hprd
4140	5318	hprd
5167	2998	kegg
642	84078	hprd
6606	2091	hprd
5435	87178	kegg
1399	6776	hprd
3172	6667	hprd
226	5213	kegg
3630	4821	kegg
3553	5970	kegg
10241	55684	hprd
169355	7166	kegg
6257	51129	kegg
23624	4067	hprd
9992	3757	hprd
3000	5142	kegg
4092	91	hprd
5753	1956	hprd
6142	26150	hprd
54658	9836	kegg
471	22978	kegg
2643	51202	kegg
1457	3217	hprd
2209	325	hprd
10622	5313	kegg
51082	318	kegg
84312	3065	hprd
3690	50509	kegg
2735	5613	kegg
122786	81628	hprd
57325	1466	hprd
55333	10928	hprd
53358	4915	hprd
356	23048	hprd
2776	3358	hprd,kegg
10513	220686	hprd
5599	1847	kegg
51251	23475	kegg
10919	80125	hprd
367	2932	hprd
7405	26276	hprd
6422	7475	kegg
9169	6427	hprd
5337	60	hprd
81579	2778	kegg
840	2802	hprd
288	51361	hprd
10197	11033	hprd
3672	6696	kegg
92935	635	kegg
4750	7249	hprd
3190	5093	hprd
1459	5504	hprd
3611	5467	kegg
7812	26986	hprd
6714	1605	hprd
9533	114	kegg
6017	9368	hprd
1285	6288	hprd
3676	3688	hprd
207	4234	hprd
1558	113612	kegg
10052	7082	hprd
6814	6606	hprd
5879	7277	hprd
250	9416	kegg
29895	91807	kegg
7431	26150	hprd
1120	43	kegg
50846	5727	hprd,kegg
1646	1571	kegg
7431	10155	hprd
4914	9093	hprd
112	954	kegg
115	5138	kegg
124583	1633	kegg
5434	108	kegg
445	2006	hprd
695	7099	hprd
11102	10556	hprd
9892	5335	hprd
23266	50944	hprd
2139	11030	hprd
7329	3725	hprd
840	8428	hprd
30011	5295	hprd
7013	11244	hprd
22800	10235	kegg
5163	5160	hprd
2963	405	hprd
126	10941	kegg
23012	8428	hprd
5602	1398	kegg
2944	1558	kegg
1235	1672	hprd
5159	1956	hprd
6195	4929	hprd
4942	56893	hprd
2034	7422	kegg
578	2081	hprd
84100	51329	hprd
2908	3932	hprd
1459	2957	hprd
9823	7431	hprd
9414	6294	hprd
10645	5571	kegg
9021	3717	hprd,kegg
5328	5269	hprd
7297	5781	kegg
25885	55811	kegg
10451	3480	hprd
1557	8398	kegg
6813	6634	hprd
10207	56288	hprd
51635	114799	kegg
57819	6635	hprd
983	10657	hprd
4678	8355	hprd
55840	6917	hprd
5792	8471	kegg
8522	58	hprd
55201	9083	hprd
8076	1953	hprd
1981	1977	hprd
56034	7341	hprd
4856	3479	hprd
1956	9522	hprd
7532	3667	hprd
7029	1869	hprd
6279	22984	hprd
1740	3761	hprd
6402	920	hprd
10402	10678	kegg
124	7366	kegg
284541	247	kegg
9400	9788	hprd
9098	56970	hprd
5290	56623	kegg
823	55325	hprd
5578	2915	hprd
6714	2272	hprd
51327	81488	hprd
2263	3630	kegg
8841	9989	hprd
1573	246	kegg
1602	7329	hprd
8659	2752	kegg
5058	9815	hprd
1612	219699	hprd
2057	5335	hprd
128	7363	kegg
7010	6464	hprd
2158	2147	hprd,kegg
2261	8823	kegg
8277	64080	kegg
2004	6929	hprd
640	2213	hprd
3655	1286	kegg
2944	2936	kegg
5335	2534	hprd
5058	2064	hprd
84812	253430	kegg
1806	139596	kegg
11059	27332	hprd
5580	118	hprd
8277	22934	kegg
5361	5880	kegg
5170	6257	kegg
128	1312	kegg
1439	3815	hprd
55703	4830	kegg
7532	5618	hprd
25929	6635	hprd
6714	4233	hprd
2000	7314	hprd
84080	81628	hprd
51082	954	kegg
6422	81029	kegg
2902	1812	hprd
324	1487	hprd
3843	5903	hprd
5469	672	hprd
6714	1027	hprd
54578	3275	kegg
5777	3953	kegg
51765	5894	hprd
4851	151636	kegg
5128	7532	hprd
31	5564	kegg
6880	1999	hprd
5440	29922	kegg
10524	1869	hprd
2547	6904	hprd
6869	2769	kegg
5294	208	kegg
1020	4205	hprd
51035	7046	hprd
26994	10617	hprd
10915	6426	hprd
652578	2207	kegg
25862	9440	hprd
974	930	hprd
64321	1499	hprd
1051	6688	hprd
4089	1028	kegg
5631	5238	kegg
953	112	kegg
818	6772	hprd
126	1572	kegg
3516	9541	hprd,kegg
650	8646	hprd
23043	4690	hprd
9001	11079	hprd
6925	429	hprd
6866	6870	hprd
5579	2905	kegg
2157	433	hprd
8894	9842	hprd
30812	3087	hprd
64682	10393	kegg
6483	51301	kegg
801	6344	hprd
149233	867	kegg
1808	2242	kegg
51082	5315	kegg
5331	5535	kegg
2776	623	hprd,kegg
2188	2189	hprd
83897	83755	hprd
10920	7157	hprd
1238	6370	hprd
2876	2678	kegg
3312	8841	hprd
1856	408	hprd
6241	87178	kegg
2547	65057	hprd
2977	10846	kegg
5296	7409	kegg
10972	23385	hprd
9815	5829	hprd
4147	1286	hprd
1399	3685	kegg
4790	2919	kegg
29893	2100	hprd
30846	1173	hprd
23658	3184	hprd
5925	996	hprd
2257	4233	kegg
4087	162	hprd
8821	3613	kegg
10320	7329	hprd
8683	5940	hprd
7531	10749	hprd
6628	11161	hprd
953	5149	kegg
1601	6714	hprd
2821	3486	hprd
2066	4582	hprd
50509	3673	kegg
4802	4801	hprd
8503	2065	kegg
[truncated: 55,091 more rows]
