# Supplementary material for: Inferring pathway crosstalk networks using gene set co-expression signatures
Source: Royal Society of Chemistry journal article supplement (doi:10.1039/c3mb25506a), 2013-03-21
Supplement: c3mb25506a_2.xlsx [file c3mb25506a_2.xlsx]

## Sheet: fold_change_matrix.simulation
gene	Sample_0146	Sample_0175	Sample_0039	Sample_0038	Sample_0172	Sample_0071	Sample_0042	Sample_0011	Sample_0077	Sample_0163	Sample_0096	Sample_0092	Sample_0070	Sample_0270	Sample_0025	Sample_0119	Sample_0106	Sample_0159	Sample_0171	Sample_0108	Sample_0114	Sample_0148	Sample_0115	Sample_0160	Sample_0079	Sample_0090	Sample_0064	Sample_0072	Sample_0074	Sample_0174	Sample_0089	Sample_0073	Sample_0098	Sample_0068	Sample_0049	Sample_0062	Sample_0036	Sample_0116	Sample_0164	Sample_0275	Sample_0200	Sample_0156	Sample_0162	Sample_0128	Sample_0084	Sample_0161	Sample_0212	Sample_0203	Sample_0179
55319	-0.462	-0.309	0.638	0.175	1.239	-0.189	-0.862	0.11	-0.537	0.01	0.166	0.243	-0.311	0.427	1.27	0.521	-0.002	-0.2	0.297	-0.071	0.301	0.534	0.305	0.455	0.299	-0.193	1.095	0.431	0.579	0.514	-0.289	0.082	0.684	-0.081	-0.397	-0.833	0.218	-0.225	0.812	-0.508	-0.301	-1.213	0.453	-0.634	0.338	0.203	0.105	-0.479	0.502
83937	0.507	1.532	0.443	0.525	-1.082	1.432	-0.541	0.917	-1.079	-0.386	0.794	-0.892	0.493	0.459	0.446	0.89	0.974	0.213	0.607	-0.508	1.224	0.652	0.685	0.543	0.678	0.285	0.992	0.694	0.838	1.56	0.977	1.476	0.96	1.511	2.652	0.869	0.801	0.089	1.599	1.528	-0.34	1.709	0.452	0.922	0.938	1.072	0.961	1.222	1.644
10362	-0.2	0.77	0.432	0.323	-0.07	0.197	0.491	-0.455	1.265	0.47	-0.469	-0.125	-0.417	0.232	0.359	0.096	0.567	0.007	0.188	0.553	-0.164	-0.45	-0.063	0.295	0.616	0.829	-0.356	0.395	0.283	0.521	-0.357	0.356	0.376	-0.008	0.324	0.05	0.124	0.205	-0.367	-0.107	0.112	1.004	0.077	0.327	0.125	0.183	-0.046	-0.006	0.362
79635	2.686	1.039	1.612	0.835	0.88	-0.485	1.317	0.06	0.442	0.764	-0.787	2.32	1.19	0.766	1.214	0.918	-0.647	-0.728	1.242	-0.052	0.251	1.566	0.772	1.26	-0.018	1.665	-0.388	0.932	0.288	1.002	-0.02	2.358	0.384	-0.011	1.774	0.416	0.323	1.163	1.454	2.791	0.512	-0.207	0.186	0.027	0.202	1.537	2.105	0.817	0.721
8228	0.368	-0.797	-0.212	-0.15	0.769	-1.278	-0.657	-0.809	0.356	0.255	-1.125	0.301	-0.494	-0.556	-0.148	0.298	-0.437	-0.702	0.015	-0.896	-0.33	-0.162	-0.1	0.445	-1.261	0.171	-1.603	0.369	0.371	0.596	-0.161	-0.309	-1.156	-1.622	-0.205	-0.22	-0.27	0.163	-0.253	-0.212	-0.225	-2.637	-2.242	-0.639	-0.614	-0.169	-0.48	-0.63	-0.837
2648	0.326	1.963	0.93	0.299	0.848	0.387	0.48	-0.616	0.454	0.284	-0.133	1.146	1.043	0.417	0.26	0.735	0.68	1.377	1.578	-0.261	-0.026	0.653	0.878	0.176	-0.058	-0.039	0.729	0.661	0.333	0.539	-0.189	0.613	0.437	0.431	0.97	0.542	0.161	1.156	0.005	0.081	-0.417	1.224	0.81	0.876	0.932	-0.249	0.717	0.737	1.358
23254	0.133	-1.304	-1.088	0.012	-0.99	-0.474	0.195	-0.584	-1.233	-0.677	-0.791	-0.434	-0.501	-1.378	-1.07	-1.566	-1.04	-0.783	-0.606	-0.873	-1.364	-1.302	-0.417	-2.337	-1.424	-0.243	-0.849	-0.852	-0.484	-0.034	-1.38	-0.489	-0.671	-0.681	-0.707	-0.874	-1.641	-1.043	-0.939	-0.466	-1.772	-1.306	-1.438	-0.984	-0.005	-0.986	-1.797	-1.928	-0.504
10568	-0.01	-0.5	-0.206	0.126	0.214	-0.686	0.062	-0.283	-0.254	0.283	-0.026	-0.068	-0.009	0.15	0.059	0.118	0.35	-0.221	0.07	-0.071	0.068	-0.277	0.083	-0.108	0	0.139	-0.244	0.245	0.228	0.078	0.217	0.308	-0.548	-0.576	-0.298	0.05	0.39	-0.121	-0.426	0.708	-0.129	0.448	-0.15	-0.195	-0.072	-0.168	-0.663	-0.07	0.199
10071	-0.126	1.068	-0.935	-0.28	1.613	0.868	-0.803	-0.653	1.695	0.099	0.315	-0.611	1.03	0.122	-0.248	-0.351	0.404	0.444	0.485	0.017	0.05	-0.21	0.046	-0.417	-0.115	0.185	0.298	-0.268	-0.599	-0.395	-0.311	-0.414	-0.205	0.455	-0.055	1.019	-0.833	3.547	-0.22	-0.713	-0.424	-0.028	0.623	-0.504	-0.099	-0.223	1.387	-0.114	-0.012
10536	-0.058	-0.094	-0.7	-0.688	-0.778	0.94	-0.535	-0.426	0.499	-0.516	-0.192	-0.121	0.129	-0.609	-0.135	-0.72	-0.253	0.522	-0.165	-1.007	-0.532	-0.795	-0.313	-0.382	-0.128	-0.618	-0.541	-0.87	-0.433	-0.635	-0.616	-0.47	-0.14	-0.252	0.527	0.075	-0.954	0.001	-0.552	-0.234	-0.89	0.004	-0.631	-0.087	0.448	-0.21	-0.851	-0.478	0.091
1201	1.332	1.044	1.71	0.475	0.354	1.151	1.713	1.02	1.381	1.554	0.63	0.627	0.855	0.21	0.687	1.368	0.367	0.337	0.58	0.703	0.746	1.139	1.439	0.761	0.479	1.379	-0.023	0.724	1.421	1.278	0.31	0.643	-0.061	0.306	2.581	0.754	0.937	2.355	0.664	1.538	2.961	1.972	0.223	1.676	0.955	0.49	0.693	0.642	2.406
644591	0.204	1.699	0.057	0.172	1.903	0.591	0.341	0.43	0.504	-0.707	0.52	0.764	-0.09	-1.058	-1.241	-0.766	0.593	1.478	0.325	0.464	1.546	-0.882	-0.469	1.761	-0.086	-0.788	0.104	0.372	1.008	-1.17	0.575	0.485	-0.247	-0.361	-0.352	1.532	-0.814	-0.121	0.579	1.561	0.304	1.487	-0.43	1.256	-0.465	0.057	-0.238	0.105	1.097
115572	-0.119	0.001	-0.26	0.443	-0.089	0.206	0.823	-0.685	0.824	0.675	0.389	-0.333	0.413	-0.34	-0.049	0.194	0.802	-0.443	0.281	0.005	-0.285	0.185	0.148	-0.277	-0.551	0.173	0.683	-0.331	-0.486	-0.518	0.284	0.612	-0.039	0.186	1.048	0.581	-0.309	0.017	-0.207	-0.056	0.426	0.68	-0.359	-0.074	0.185	0.261	0.683	0.332	-0.505
26783	-0.535	0.392	0.943	0.351	1.416	-0.09	0.109	-1.054	-0.035	0.262	-0.352	0.157	-0.074	0.026	0.933	0.737	0.507	2.85	-0.153	0.498	0.3	0.855	0.782	0.012	1.009	0.23	1.435	-0.02	0.965	0.78	-0.183	-0.004	1.229	0.166	0.69	0.365	0.374	0.363	-0.207	-0.517	0.291	0.791	1.724	-0.115	0.529	-0.229	0.498	0.915	-0.027
5991	0.433	-0.299	-0.153	0.365	-0.015	0.696	-0.241	0.114	-0.039	-0.19	0.051	0.789	0.216	-0.089	0.398	-0.311	0.161	0.391	1.121	0.026	-0.004	-0.338	0.265	-0.13	0.304	-0.396	0.869	-0.389	0.554	-0.564	-0.42	0.831	0.624	1.093	-0.268	0.268	-0.766	-0.263	0.626	-0.471	0.586	0.284	1.025	-0.184	0.029	0.176	-0.052	0.063	0.471
26273	-0.013	-0.831	0.138	-0.102	0.503	-0.608	-0.507	-0.53	0.208	-0.258	-0.086	0.557	-0.326	-0.439	-0.018	-0.499	-0.846	-0.564	0.25	-1.203	0.13	0.881	0.373	-0.106	-0.536	0.148	-1.471	-0.325	0.392	0.096	-0.536	0.214	-0.541	-1.224	-0.514	-0.513	-0.205	0.034	0.329	0.122	-0.513	-1.597	-0.219	-0.082	-0.19	0.167	-0.264	-0.351	-0.157
8564	-1.03	-4.137	-1.863	0.173	-2.261	-2.096	-1.742	-2.783	-2.809	-0.882	-1.994	-0.153	-2.603	-3.317	-4.813	0.065	-1.979	-3.427	-3.745	-1.438	-1.87	-2.628	-4.744	-0.455	-3.252	-2.477	-2.508	-2.912	-2.491	-1.02	-0.265	-1.578	-3.725	-3.009	-2.186	-1.881	-2.246	-4.217	-1.728	-3.713	-4.917	-3.402	-4.313	-1.752	-3.371	0.101	-1.868	-1.358	-3.854
29984	-0.208	-0.515	-0.36	0.202	-0.297	0.687	-1.2	0.04	-1.328	0.958	-0.619	-0.615	-0.383	-0.834	-0.762	-0.565	1.495	-0.828	-0.675	-0.327	-0.885	0.443	0.226	-0.269	-0.65	0.727	-0.328	0.101	0.247	0.885	0.308	-0.484	-0.354	-0.554	-0.108	-0.381	0.76	0.309	-1.615	-0.633	-1.226	-1.146	1.868	1.754	0.133	-0.672	-0.141	1.231	0.188
4677	-0.495	-0.745	0.561	-0.803	1.25	-0.149	-0.626	-0.344	-0.434	-0.222	0.521	0.639	-1.22	-0.001	1.169	0.874	0.276	-0.418	0.638	0.101	-0.265	1.368	0.767	0.313	0.647	-0.197	0.235	0.34	0.343	0.655	0.937	-1.124	0.45	-1.108	-0.19	0.15	0.249	0.647	0.66	-0.98	0.179	-1.113	0.113	-0.232	0.561	-0.237	0.518	1.33	-1.23
84765	0.777	0.279	-1.919	-0.733	0.903	0.727	0.614	-0.821	0.951	-0.465	-0.744	0.772	1.707	-0.823	-1.61	-2.803	-0.387	1.464	-0.5	-0.869	0.654	0.598	0.636	1.295	1.644	-1.442	-0.583	-3.778	-0.907	-1.629	0.127	1.124	-0.274	0.968	-2.648	0.764	-0.609	-1.483	-1.44	2.147	-0.427	2.899	-1.638	-0.697	-1.415	0.382	-1.248	1.113	-0.842
92400	-0.353	-0.481	0.647	0.439	1.033	-0.587	-0.203	0.04	-0.026	-0.336	-0.477	0.768	-0.482	-0.391	0.274	0.151	0.245	-0.459	0.808	-0.223	-0.052	0.832	-0.216	-0.128	0.291	0.068	0.43	0.492	0.12	1.437	1.012	-0.78	-0.517	-0.17	0.285	-0.799	0.682	0.211	0.416	1.293	-0.208	-0.963	-0.755	-0.237	0.937	0.451	0.224	0.414	0.299
142940	0.448	-0.161	0.344	0.532	0.21	-0.961	-0.683	0.58	0.333	-0.739	-0.14	1.069	0.761	0.225	-0.403	0.51	-0.708	-0.401	-0.295	0.116	0.353	0.881	0.106	-0.592	-0.225	-0.315	-0.078	0.434	-0.055	-0.45	0.326	0.377	0.205	-0.876	0.52	0.531	0.398	0.188	0.573	0.911	-0.557	-0.194	-0.14	-0.615	-0.503	-0.637	-0.393	0.445	0.776
5159	1.559	-0.126	-0.032	-0.616	-0.3	2.08	-0.707	0.883	-0.391	0.028	1.414	-0.527	1.666	1.169	-0.368	-0.472	0.37	2.178	1.536	0.544	0.333	0.954	0.634	0.007	-0.378	-0.559	0.772	-1.269	1.697	0.676	0.173	2.408	0.291	1.797	0.357	1.434	-1.492	-0.481	-0.414	0.054	0.126	1.345	-0.057	1.208	2.197	1.659	-0.574	0.224	1
64173	-0.544	0.189	0.397	-0.563	-0.954	-0.438	0.945	-0.181	-1.393	0.246	-0.879	0.163	-0.917	-0.104	-1.921	0.121	-0.229	-0.875	-0.283	-0.135	-0.237	-1.235	-0.241	0.229	-1.465	0.423	-0.103	0.927	-0.503	-0.398	-0.197	0.457	-0.252	0.406	0.626	0.006	-0.232	-0.544	0.024	0.506	2.062	1.004	-0.339	0.881	-0.625	-0.227	-0.429	1.042	-0.725
3833	1.476	2.937	4.832	0.926	2.55	1.772	3.686	2.373	2.139	1.624	3.297	1.425	1.831	1.961	2.095	3.586	3.62	3.472	3.071	2.824	1.867	3.338	2.263	2.157	2.727	2.706	2.931	0.475	3.336	1.131	2.622	0.939	2.713	1.39	3.107	1.942	2.359	3.086	3.039	2.493	2.406	3.156	3.857	1.329	0.486	1.506	2.253	1.514	3.913
10855	-0.046	0.05	-0.226	0.183	-0.053	-0.23	-2.081	-0.404	-2.015	-1.315	0.621	-2.875	-0.645	-1.033	0.304	-0.508	-0.791	0.373	-0.532	0.258	-0.071	-0.511	-0.941	-0.643	0.206	-2.073	1.749	-1.207	-1.967	-0.712	-0.672	-1.093	-0.074	0.624	-2.772	-1.865	-0.376	-1.606	0.459	-0.994	-2.415	-2.381	0.159	-1.184	-0.544	0	2.333	-2.006	-0.456
90843	-1.128	-2.921	-1.944	-1.739	-1.434	0.639	0.013	0.545	1.462	-0.385	-0.394	-2.593	2.032	-1.532	-1.754	1.138	-2.065	0.311	-2.264	2.466	0.948	-0.978	-0.199	-2.199	0.969	0.584	0.165	-0.338	-1.904	-2.112	0.34	-1.243	-1.471	-0.26	0.105	1.332	-0.949	-3.209	1.217	0.735	1.453	-5.196	-0.5	-0.075	0.611	-0.428	-1.45	-0.123	1.722
4772	0.348	0.875	-1.44	0.304	-0.832	0.864	-2.686	-0.309	-3.239	-0.326	0.842	-1.838	-0.184	-1.808	-0.951	-1.833	-0.66	-0.669	-1.558	-0.989	0.075	0.945	-0.4	-2.389	-1.817	-1.642	-0.569	-1.402	-0.152	0.129	-1.104	0.947	0.189	2.341	-1.114	-1.464	-0.894	0.15	-0.974	-2.721	-3.737	-1.387	-0.737	0.147	0.254	0.461	-0.082	-1.486	-0.008
7019	-0.087	-0.205	-0.076	-0.637	0.427	-1.068	-0.915	0.219	-0.346	-0.549	-0.378	0.051	0.622	0.178	0.726	-0.128	-0.954	-0.109	-0.627	1.093	-0.203	0.518	0.514	0.696	-0.061	-0.392	0.533	0.324	0.125	-0.179	0.148	-0.344	0.476	-0.969	-0.47	0.059	-0.05	-0.437	0.168	-0.95	0.39	0.052	0.499	-1.296	-0.56	-1.864	-0.217	0.176	-0.26
440498	-0.183	-0.744	-0.86	-0.22	-0.105	-1.163	-0.449	-0.997	-0.146	0.576	-0.721	-0.074	0.077	-1.701	0.182	0.077	-0.545	-0.141	0.384	-1.225	-1.624	-0.004	-0.095	0.165	-0.322	0.745	-0.703	-0.192	-0.768	-0.114	0.164	-0.405	-0.153	-1.691	-0.922	0.363	-0.098	-0.984	-0.395	-0.823	-0.047	0.286	0.349	-0.513	-0.807	0.049	0.152	-0.112	-0.114
65980	0.827	1.843	0.312	-0.046	-0.084	0.722	0.502	0.859	0.991	0.267	0.658	0.34	0.514	1.175	0.409	0.622	1.638	0.421	0.17	-0.045	0.365	1.09	0.967	0.503	0.865	0.444	1.356	0.818	0.44	0.147	0.645	0.508	1.086	0.958	1.338	0.797	0.456	0.008	1.259	-0.73	0.208	1.456	1.746	2.01	0.306	-0.101	0.566	1.072	0.581
149563	0.615	3.038	1.775	0.877	1.538	-0.363	0.008	-0.248	0.005	0.357	-0.881	1.347	0.621	0.701	0.163	-0.27	0.27	-0.567	-0.13	-0.06	-0.66	0.676	0.641	-0.171	0.606	0.042	3.269	2.311	4.647	5.749	-0.005	-0.171	2.985	0.332	0.078	0.108	1.979	-0.194	-0.408	0.116	0.06	1.163	2.48	-0.473	0.061	-0.133	-0.02	2.027	0.46
790955	0.186	-0.615	-0.222	-0.835	0.807	-0.442	0.475	0.025	-0.354	0.313	-0.815	0.214	-0.403	-0.063	0.467	0.022	0.075	-1.027	-0.11	-0.205	-0.093	0.042	0.244	0.648	1.157	0.305	0.537	0.001	0.727	0.48	0.4	-0.683	0.797	-1.018	0.123	0.275	0.505	-0.703	-0.38	-0.236	-0.569	-0.327	-0.071	-1.133	-0.075	-0.615	-0.617	0.755	-0.111
373861	-0.225	-0.033	-0.113	0.735	0.014	-0.469	-0.221	-0.345	0.135	-0.288	-0.463	0.035	0.028	-0.794	0.701	0.115	-0.038	-0.106	0.009	-0.109	-0.454	-0.293	0.144	0.232	-0.197	0.157	-0.428	0.323	-0.468	0.166	-0.178	-0.283	-0.125	-0.228	-0.11	-0.134	0.091	-0.346	-0.339	0.119	-0.092	-0.11	0.15	-0.167	-0.408	-0.235	-0.539	-0.224	0.318
131965	0.112	0.294	0.319	1.069	0.548	-0.009	-0.1	-0.734	-0.302	0.199	-0.881	0.185	0.048	-0.007	0.563	-0.191	0.106	-0.323	0.171	-0.237	-0.124	-0.384	0.353	-0.316	0.047	0.777	-0.166	0.456	-0.394	0.575	0.178	-0.39	-0.337	-0.201	0.17	-0.295	0.659	-0.294	-0.599	0.162	-0.088	-0.02	-0.101	0.508	-0.126	-0.108	-0.055	0.117	0.607
23132	-0.24	0.53	0.281	0.163	0.641	-0.642	1.625	-0.864	1.414	-0.5	-0.407	0.964	-0.441	0.587	0.633	0.41	0.512	0.211	0.595	-0.689	-0.099	-0.6	0.565	-0.229	0.038	1.422	-0.395	0.906	0.54	0.405	0.567	0.756	-0.067	0.037	0.046	0.593	0.005	0.656	-0.438	-0.418	0.828	1.859	0.194	1.218	0.644	0.043	-0.096	0.342	-0.065
728712	-0.092	-0.2	0.214	0.515	-0.098	0.059	0.152	-0.114	0.405	0.076	-0.05	0.118	-0.14	0.1	0.056	0.123	0.26	-0.353	-0.056	-0.102	-0.318	0.162	0.346	0.135	6.748	0.209	1.435	0.171	0.071	0.052	-0.159	-0.262	0.899	-0.026	0.306	0.239	0.746	0.382	0.531	-0.003	0.253	0.14	0.556	-0.087	-0.516	0.118	-0.378	0.002	0.276
148709	1.327	1.562	2.919	0.803	0.403	1.183	2.233	0.303	2.289	0.534	-1.097	2.153	1.786	-0.524	0.894	-0.275	1.677	-0.118	0.921	1.284	0.179	-0.005	1.904	2.162	0.248	2.135	-0.003	2.187	3.022	3.851	0.38	-0.071	-0.261	-0.337	1.078	1.516	1.558	1.244	0.177	1.85	2.394	1.955	-1.048	1.731	2.457	0.63	-0.917	1.134	2.585
84079	0.837	0.961	1.421	0.036	0.281	1.1	0.518	1.108	0.816	0.238	1.184	0.14	-0.239	1.063	1.005	1.256	1.621	1.425	3.439	0.858	0.637	0.874	0.815	0.247	1.858	0.093	1.611	0.636	0.553	0.87	1.195	0.971	1.074	0.944	1.236	-0.451	0.319	0.89	1.142	0.474	0.064	1.696	1.373	0.463	1.095	0.799	2.58	0.911	1.236
65084	0.644	-0.153	1.16	-1.214	1.886	-0.269	-0.212	0.529	-1.312	-0.148	-0.297	0.137	0.506	-1.187	-0.132	-0.076	0.714	-0.074	1.379	-0.784	0.168	0.675	0.191	0.019	0.046	-0.707	-0.234	0.587	-0.159	0.4	0.917	-0.778	0.231	-1.448	0.227	0.261	0.479	0.004	0.953	1.252	0.202	-1.394	-1.272	-1.736	-0.18	1.374	-0.339	0.491	-1.62
79725	-0.091	-1.325	-0.418	1.327	0.788	0.46	-0.182	0.58	-0.622	0.06	-0.672	1.225	0.83	1.093	-0.213	0.369	-0.57	-0.478	-0.249	-0.114	-0.27	-0.398	0.03	0.792	-0.425	0.045	-1.06	-0.208	0.693	-0.536	-1.198	0.511	-0.002	-1.674	-0.311	-0.184	0.352	-0.075	1.316	-0.227	-0.511	-0.86	-0.555	-1.199	-0.46	0.361	-0.263	-0.168	-0.097
54903	-0.693	1.886	0.62	0.191	0.461	-0.254	0.879	0.845	1.323	0.236	0.019	1.41	0.147	0.726	0.58	0.611	-0.453	0.293	1.314	0.328	0.159	0.07	0.124	0.156	-0.181	0.643	-0.726	0.889	0.808	0.032	-0.36	0.687	0.176	0.347	0.931	0.661	-0.292	0.915	0.441	0.8	0.543	0.53	-0.254	0.728	-0.405	-0.687	0.28	0.391	0.267
116511	0.145	-0.033	-0.424	1.1	0.11	-0.683	-0.172	-0.607	0.45	0.514	-0.248	0.417	-0.35	0.02	1.047	0.055	-0.332	-0.504	0.104	-0.026	0.309	0.131	-0.105	-0.029	0.08	0.584	-0.029	0.376	-0.398	0.732	-0.121	-0.348	-0.46	-0.333	0.257	0.002	0.029	-0.054	-0.104	0.201	0.247	-0.136	-0.065	-0.04	-0.26	-0.443	-0.254	0.219	0.21
9969	-0.63	0.391	0.376	-0.976	0.099	-0.141	0.75	0.824	0.134	-0.463	0.276	0.331	0.489	0.392	1.254	1.143	0.128	-0.689	0.677	0.371	-0.402	0.654	0.418	0.46	-0.802	0.256	-0.01	0.912	0.284	-0.26	0.404	0.315	-0.201	-0.117	0.206	0.038	-0.065	1.05	1.086	1.807	0.095	-0.496	-0.152	-0.09	-0.33	0.518	-0.793	0.364	-1.15
23348	-0.242	-0.387	0.343	0.872	-0.327	0.163	0.76	1.175	0.039	1.232	0.688	0.019	0.634	1.195	-0.337	0.061	0.375	0.828	0.653	-0.108	0.481	0.428	0.107	0.372	-0.539	0.202	0.337	0.191	0.068	0.034	0.424	1.261	0.3	0.912	-0.38	-0.448	0.312	0.509	0.515	0.716	0.339	-0.935	-0.83	1.003	1.332	0.748	-0.068	-0.048	0.609
2009	-0.246	-0.275	-0.624	0.747	-0.588	-0.32	-2.358	-2.287	-1.448	-2.113	0.295	-0.691	-0.659	0.488	-2.66	-2.043	-1.402	-0.148	0.241	0.298	-0.524	-0.668	-0.029	-1.158	-0.444	-1.439	-1.182	-1.925	-0.05	-0.214	-0.408	0.291	0.43	-1.374	0.475	-0.926	-1.71	-1.025	-1.069	-0.349	-3.025	-1.528	-1.257	-1.178	-0.566	-0.158	-2.187	0.112	-1.142
55879	0.283	0.532	0.297	-0.236	0.408	-0.757	0.079	0.353	1.053	0.386	-0.179	0.425	-0.072	0.435	0.478	1.208	0.686	-0.118	0.518	0.008	-0.312	-0.356	0.053	0.156	2.228	0.561	1.779	-0.033	0.427	0.206	0.292	-0.54	0.735	0.15	0.331	0.182	0.694	0.159	0.573	0.005	0.454	0.192	0.338	1.914	1.23	-0.358	-0.137	0.405	-0.063
23237	-0.057	0.026	-0.149	0.453	0.096	-0.085	0.223	-0.329	-0.617	0.019	-1.002	-0.091	-0.421	0.357	0.146	-0.199	-0.29	-0.185	-0.355	-0.295	-0.285	-0.25	-0.358	-0.6	-0.445	1.039	-1.022	0.259	1.359	0.412	-0.384	-0.34	-0.33	-0.641	-0.507	-0.238	-0.202	-0.351	-0.598	0.127	-0.101	-0.033	-0.566	-0.376	-0.234	0.282	-0.114	-0.383	-0.106
10555	-1.465	-1.349	-1.424	0.055	0.193	-1.333	0.414	-0.681	0.841	0.162	-0.877	-1.281	-0.484	-0.721	-1.312	-0.767	0.277	0.515	-1.285	-1.094	-0.196	-1.66	-1.174	-0.74	0.672	-0.465	-1.323	-0.918	-1.087	-1.106	-0.938	0.324	-0.755	-1.321	-0.464	-0.408	-0.853	-1.386	-1.286	-0.629	0.351	1.191	-0.445	-0.515	-0.985	-1.848	-0.681	-0.162	-0.231
9681	0.212	-0.762	0.21	0.832	-0.273	-0.157	1.221	-0.523	-0.129	-0.157	-0.138	0.547	-0.545	-0.122	-0.25	-0.095	0.341	-0.481	0.917	-0.684	-0.429	0.435	0.252	0.846	-0.321	0.793	-0.735	0.749	-0.473	0.953	0.173	0.927	-0.121	0.01	0.616	0.989	0.405	0.35	-2.937	1.372	1.63	-1.322	-0.797	0.781	-0.538	0.334	0.219	-0.475	0.428
642946	0.806	3.368	0.944	-0.101	2.388	1.246	0.012	1.726	2.883	0.534	-0.191	0.991	1.917	-0.072	1.92	0.692	2.051	1.712	2.184	2.347	0.671	1.188	1.122	0.988	2.265	-0.645	1.398	0.658	0.963	0.93	1.778	0.521	1.326	1.044	1.194	2.269	1.675	1.773	1.463	0.087	1.978	1.837	1.091	0.76	1.014	1.507	0.754	0.843	1.779
54886	1.47	1.227	1.849	0.217	3.309	-0.616	1.702	0.813	1.156	-0.649	-0.469	0.444	2.731	0.351	3.217	1.947	1.23	3.181	2.125	1.287	-0.474	2.464	1.664	0.158	2.395	0.49	0.591	2.491	3.193	3.364	1.556	3.715	1.809	-0.751	0.645	2.097	3.034	0.92	-0.132	1.808	0.131	0.526	1.363	-0.135	0.853	3.886	0.851	0.154	0.752
84955	0.576	1.714	2.589	-1.284	1.542	1.471	-0.411	0.882	0.265	0.186	0.701	0.809	1.074	0.906	1.947	1.507	0.328	1.011	1.678	0.614	0.482	2.159	1.703	0.543	1.106	0.145	0.206	0.955	1.693	1.03	0.444	0.287	1.479	0.196	-0.109	0.494	0.58	1.349	0.939	0.291	-0.34	-0.342	1.114	0.365	0.656	0.066	1.332	0.452	0.92
6791	-0.185	0.16	-0.881	-1.205	0.651	0.518	0.554	1.081	0.012	-0.761	0.173	0.824	-0.208	-1.303	0.358	1.004	2.347	-0.011	-0.552	0.364	1.125	1.517	-0.116	0.786	1.017	0.354	0.409	-0.432	-0.05	-1.132	1.034	0.516	-0.009	1.197	0.324	0.613	-0.265	0.913	2.428	-0.981	0.902	1.737	2.147	-0.49	0.992	0.772	0.585	0.343	1.77
116843	-0.361	-0.046	0.121	0.174	0.318	0.154	-0.893	0.675	-0.228	-0.006	0.243	-0.967	0.673	-0.826	-0.47	-0.18	0.631	1.546	1.043	-0.689	0.972	0.003	-0.689	0.854	0.991	-1.31	0.964	-0.072	-0.884	-1.264	0.479	0.186	0.864	0.994	0.871	-0.291	0.155	0.565	-0.011	0.437	0.373	0.851	1.504	0.774	-0.066	0.892	1.365	-0.01	0.191
148252	-0.334	-0.505	-0.759	0.746	0.452	1.158	-0.139	-0.04	2.831	0.066	0.66	0.187	-0.281	-0.433	-0.048	0.01	0.602	1.119	-0.62	0.145	-0.611	0.581	-0.836	-0.309	0.273	0.035	-0.762	-0.192	-0.338	-0.112	-0.344	-0.772	-0.235	-0.228	1.703	0.014	-0.274	1.914	-0.214	-0.676	-0.076	-0.234	-0.355	-0.962	-0.538	-0.571	0.253	-0.094	0.077
6576	0.305	0.307	1.073	0.498	1.259	0.042	1.624	-0.565	0.915	1.057	-0.481	0.467	0.713	-0.321	-0.697	0.013	0.103	0.212	0.457	-0.06	-0.468	0.92	-0.091	-0.224	0.92	1.495	0.02	0.463	0.79	1.125	0.011	-0.386	0.328	-0.399	0.118	0.958	0.728	-0.497	-2.056	0.277	-0.202	-0.358	-0.327	0.514	-0.768	-0.255	-0.324	0.349	0.109
10948	0.061	0.788	-0.176	0.171	-0.002	-0.053	0.432	0.125	0.658	0.533	0.053	0.063	0.078	0.536	0.362	0.32	0.524	0.551	0.035	0.312	-0.142	-0.342	0.391	0.403	-0.024	0.612	0.44	0.712	0.515	0.161	0.24	0.731	0.185	0.294	0.313	0.256	0.314	0.382	-0.248	0.154	-0.333	1.243	0.663	0.408	-0.047	-0.005	0.951	0.414	1.106
256949	-0.618	-0.445	-0.444	0.145	-1.015	-0.45	-0.457	-1.907	-0.469	0.146	-0.808	0.511	0.002	1.269	-1.072	0.479	-1.332	0.009	-0.986	0.389	-0.334	-0.296	-0.469	1.13	-0.826	0.71	-0.357	-0.737	0.17	0.511	-0.678	-0.1	0.399	-0.123	-0.758	-0.758	-0.364	-0.854	-0.321	0.055	-0.99	-0.787	-0.299	-0.055	0.456	-0.539	-0.624	0.425	-0.139
79962	-0.621	-0.507	0.085	-0.894	1.653	-1.196	0.714	0.021	-0.451	2.021	-0.285	-0.484	-0.375	0.16	0.136	0.026	-0.051	-1.013	-0.919	-0.94	0.461	-0.635	-0.822	0.133	1.386	-0.048	0.346	-0.633	-0.224	0.249	0.344	-0.503	0.992	-2.64	-0.258	0.479	-0.401	0.044	0.039	-1.143	0.328	0.646	1.408	-0.315	-1.217	-0.413	-1.416	0.491	-0.158
286186	-0.261	0.164	-0.023	0.185	-0.034	-0.149	-0.197	0.064	-0.086	0.011	0.035	0.385	-0.369	-0.379	-0.218	-0.056	0.24	0.189	-0.209	-0.393	-0.434	-0.017	0.221	0.065	0.354	-0.64	0.006	-0.362	0.141	0.073	0.234	-0.529	-0.392	-0.222	-0.034	-0.01	0.192	0.144	-0.339	0.563	-0.022	0.604	-0.032	0.194	-0.373	0.306	-0.256	0.152	0.013
284486	0.138	1.065	0.801	0.404	1.413	1.114	2.291	1.585	1.083	1.075	0.14	1.507	-0.42	1.757	0.239	-0.152	1.748	-0.629	0.509	0.743	0.737	1.236	1.337	1.642	0.947	1.444	-0.27	2.49	1.071	1.267	2.186	-0.85	1.119	0.947	3.482	1.026	1.385	2.206	1.123	1.99	1.401	1.006	1.2	1.016	0.622	0.372	-0.596	3.063	-0.869
8871	0.321	0.036	0.798	-0.511	-0.193	0.487	0.904	0.821	1.49	0.692	1.073	-0.514	1.869	1.053	0.462	1.329	0.108	1.907	1.195	1.601	0.871	0.009	0.555	0.439	-0.099	0.836	1.333	-0.614	0.489	-0.398	0.325	0.444	0.479	0.031	0.625	1.093	-0.219	1.602	1.311	1.648	0.211	-1.005	0.773	0.86	1.28	1.464	-0.122	0.88	1.452
163259	0.98	-0.331	0.872	0.452	-1.578	-0.107	0.844	0.39	-0.994	-0.117	0.069	-0.249	0.592	-0.624	-1.265	1.344	0.77	0.496	1.751	0.649	0.496	0.092	-0.238	1.087	-1.154	-0.482	-0.06	0.411	-0.303	-0.184	0.84	2.14	-0.389	0.891	0.946	0.591	-0.671	0.585	1.076	1.355	1.238	0.26	-1.021	1.147	-0.733	0.817	0.305	1.363	-0.05
8626	0.194	1.767	1.599	0.454	-1.084	2.15	4.017	1.126	-0.631	-1.131	1.542	1.345	-0.33	0.238	-0.807	-1.654	0.224	-0.334	-1.024	-2.377	2.667	-1.084	-0.001	-0.06	0.239	1.091	0.679	3.554	1.712	-0.003	-1.561	1.161	0.374	3.076	-1.555	-0.928	-0.4	-1.362	2.718	-0.265	1.661	-2.344	-0.095	0.159	-0.973	1.264	0.566	-1.504	-0.98
9849	-0.166	1.684	0.405	0.163	1.138	0.009	0.944	0.582	-0.547	0.099	-0.28	1.049	1.835	0.568	-1.298	1.448	0.679	0.952	0.606	1.774	1.644	-0.697	-0.386	0.289	0.645	-0.089	1.178	0.126	0.657	-0.404	-0.058	2.515	0.336	0.983	1.31	1.565	0.577	0.301	1.712	1.159	1.065	1.466	0.744	0.858	0.734	0.6	0.44	1.406	1.614
1773	-0.067	0.461	0.325	-0.039	0.119	0.35	0.618	0.07	2.172	0.185	0.244	0.52	0.405	-0.019	-0.248	0.006	-0.086	0.589	0.143	-0.388	0.538	-0.746	-0.071	0.941	0.839	0.777	-0.048	0.322	0.222	0.531	-0.156	0.428	0.175	1.153	0.005	0.366	-0.334	0.432	-0.119	0.31	0.646	0.827	0.499	0.949	0.33	0.437	0.418	-0.143	0.674
54465	0.47	1.147	0.669	0.897	0.929	-0.188	-0.074	0.79	0.321	0.196	-0.34	1.553	1.239	0.564	0.278	1.204	0.328	0.773	0.183	0.182	0.474	-0.071	0.366	0.812	-0.625	0.101	1.269	-0.378	-0.115	-0.712	-0.12	1.923	0.94	0.837	1.768	0.841	0.848	0.816	0.982	-0.014	-0.556	1.2	0.399	0.995	1.099	0.58	0.352	0.831	0.586
23314	-1.099	-0.486	0.296	-0.434	0.553	-1.912	0.539	1.652	1.998	2.053	-0.218	0.986	-2.726	2.081	1.278	-2.261	0.917	0.465	0.344	0.501	0.468	0.981	0.586	1.767	1.572	1.027	-0.565	0.529	-0.138	0.807	1.091	-0.244	1.184	0.895	1.332	-0.759	1.348	1.782	1.288	0.319	2.042	1.545	0.405	1.672	0.497	0.632	0.683	1.624	-0.474
9113	-0.08	-0.131	0.191	0.736	0.3	-0.329	0.346	-0.27	-0.144	0.347	-0.212	0.259	-0.04	-0.375	-0.49	-0.019	0.104	0.187	0.2	0.336	0.143	-0.093	-0.267	-0.015	-0.078	0.353	-0.109	0.242	-0.179	-0.005	-0.281	-0.076	-0.088	-0.307	0.153	-0.552	0.087	0.032	-0.133	0.175	0.069	0.149	-0.272	0.361	-0.242	0.281	-0.32	0.002	0.083
122402	-1.275	-0.449	-0.552	-0.813	-1.589	-0.155	-1.502	1.969	-1.483	-0.715	-0.009	-1.028	1.013	0.24	-0.325	-0.69	-0.138	0.678	-0.933	-0.454	-0.006	-0.686	-0.893	-1.093	-0.151	0.225	-0.125	-1.528	-0.104	-1.112	-0.809	-0.58	-0.553	-0.126	-1.498	-1.393	-1.079	-1.629	-0.521	0.066	-1.739	-1.413	-0.704	0.09	0.435	-0.199	-1.086	-0.724	-0.311
83590	0.553	0.546	-0.16	0.406	0.101	-0.316	0.746	-0.208	0.709	0.987	-0.675	0.007	-0.137	0.082	0.454	0.304	1.03	0.555	0.091	-0.715	-0.319	-0.199	0.208	0.221	0.372	0.868	0.205	0.534	0.432	0.395	-0.251	0.493	0.616	0.275	-0.468	0.559	0.695	-0.186	-0.52	-0.035	0.27	1.604	-0.257	0.794	-0.334	-0.067	0.228	0.236	0.29
9957	-0.358	-0.172	-0.984	-0.59	-1.329	0.186	-0.123	-0.073	-0.692	0.638	1.169	-0.001	0.049	0.207	-0.317	-0.403	0.244	0.039	-0.298	0.284	0.249	0.216	0.094	-1.073	-0.918	-0.411	1.164	-1.31	-1.019	-0.342	-0.171	-0.976	-0.034	0.148	-2.736	-0.51	-0.971	-0.642	-1.13	-1.715	-1.48	-0.503	-0.374	0.083	-0.319	-0.284	-0.528	-0.486	0.141
84553	-0.504	3.085	-0.866	-0.801	1.323	-0.094	-2.299	-0.148	0.736	0.455	3.773	-0.623	-0.475	1.252	0.165	-1.754	2.876	1.142	-0.647	-0.654	0.052	2.067	1.483	0.328	-0.644	-0.701	0.608	-3.287	-0.432	-1.739	0.326	-0.484	0.685	-0.582	-2.689	0.155	-2.056	1.8	0.215	-1.22	-0.653	-0.106	3.08	-0.592	0.489	-0.242	-0.188	0.033	0.489
113026	-0.894	1.244	0.096	0.342	-1.43	1.507	0.76	-0.091	1.32	0.272	0.125	0.158	0.198	0.763	0.336	1.24	0.815	0.479	1.762	0.952	0.037	-0.347	0.735	-0.728	-0.3	0.548	0.699	0.078	-0.156	-0.179	0.527	0.269	0.018	0.176	-0.155	-0.472	-0.683	0.971	0.185	-0.47	-0.052	0.886	0.48	0.065	0.418	0.955	1.683	0.313	1.166
729608	-0.501	0.027	0.572	0.074	1.202	0.242	-0.335	-0.461	-1.024	-0.474	-0.185	0.022	0.959	-0.361	0.443	0.753	0.286	0.804	0.588	0.591	0.056	0.06	0.202	0.322	0.188	-0.636	0.532	0.05	-0.317	0.453	1.278	-1.498	-0.563	-0.929	-0.563	-0.312	0.744	0.678	-0.161	0.465	-0.463	-0.794	0.273	-0.266	0.282	0.253	-0.282	-0.331	-0.161
5193	0.084	-0.075	0.349	-0.032	0.515	-0.894	0.14	-0.252	0.15	0.65	-0.767	1.614	-1.123	0.518	-0.073	0.269	-1.81	-1.386	0.931	-1.194	-0.052	0.247	0.337	0.389	-0.802	0.276	-1.364	0.819	-0.175	0.975	-0.245	-0.747	-0.25	-1.156	0.183	-0.107	0.792	0.378	0.292	1.371	-1.546	-3.857	-2.499	0.126	-0.355	-0.789	0.234	-0.266	-1.173
3699	-0.24	-0.133	-0.868	-0.128	-1.272	-0.246	0.194	-0.106	0.211	0.249	-0.149	-0.006	0.089	0.418	0.224	-3.93	-0.366	-0.471	-3.513	0.324	-0.508	-0.797	-0.83	-0.01	0.013	0.502	-2.565	-0.299	0.137	-0.533	0.208	0.426	-0.354	-0.633	-0.645	-0.132	-0.121	-0.565	0.347	-0.167	0.112	-1.543	-0.478	0.249	0.05	-0.457	-0.585	0.138	0.187
2620	0.482	-0.843	0.581	0.611	2.61	-1.547	1.14	-0.193	1.457	-0.49	-1.291	0.245	0.453	-2.074	0.068	-0.509	-0.74	-0.152	0.621	-0.186	-1.135	-0.752	-1.23	0.304	0.25	0.535	0.146	0.671	-1.198	-0.16	-0.773	1.496	-0.147	-0.636	-1.761	0.464	0.926	-1.976	-0.667	0.859	-0.022	-2.593	-0.218	-0.695	-2.008	0.341	0.014	-0.664	-0.852
401282	0.053	0.121	-0.68	0.108	0.374	-0.682	-0.571	-0.252	-0.266	0.295	0.011	0.345	-0.252	0.456	0.081	0.091	0.008	-0.538	-0.293	-0.202	0.085	0.298	0.039	0.258	-0.137	0.437	-0.247	0.213	0.523	0.428	0.117	-0.531	0.033	-0.657	0.66	-0.683	-0.396	0.035	-0.043	-0.299	-0.405	0.9	-0.231	0.079	0.331	-0.635	-0.532	-0.269	-0.162
23576	0.125	-0.682	-0.547	0.023	-0.557	-0.358	0.456	0.479	0.06	0.008	-0.288	0.008	-0.357	-0.57	-0.213	0.54	0.461	-0.394	-0.19	-0.438	0.005	-1.363	-0.33	-0.122	-0.037	-0.245	-0.222	-0.4	-1.988	-0.541	0.762	-0.183	-0.713	-0.428	0.02	-1.069	-0.465	-0.099	0.055	0.458	0.724	0.344	-0.598	0.187	-0.208	0.131	-0.537	0.193	-0.223
5244	0.096	-1.591	-0.145	-0.22	-1.458	-0.999	0.073	0.128	-2.367	0.346	-1.623	0.692	-4.269	-0.681	-2.017	-1.968	-0.784	-2.974	-2.539	-1.738	-0.638	0.544	-0.499	0.466	-2.386	0.69	-2.475	-1.009	0.071	0.819	-1.054	-1.08	-2.311	-1.99	-1.384	-1.902	-0.072	-0.649	-0.156	1.615	-0.062	-2.31	-2.477	-0.32	-1.348	-1.3	-4.186	-0.62	-5.636
155054	0.222	0.511	-0.441	1.566	-0.631	-0.678	1.864	0.473	1.591	2.432	-0.366	2.315	-0.362	1.56	-2.284	1.78	-0.135	0.103	1.733	0.688	-0.382	-0.042	0.649	1.634	-1.015	1.775	-1.372	-0.857	1.093	1.281	-1.011	0.2	0.114	-0.003	0.977	1.283	-0.258	0.135	0.034	2.228	0.332	-2.056	-0.745	1.816	-0.829	1.335	1.423	2.118	1.205
1639	-0.156	1.442	0.57	0.238	0.39	0.506	0.628	0.381	0.623	0.306	0.084	0.318	0.376	0.482	-0.137	0.424	0.653	0.549	1.064	0.564	0.245	-0.196	1.038	-0.167	1.191	0.831	0.552	0.066	1.293	0.607	0.169	0.509	0.983	0.62	1.296	0.611	0.882	0.713	-0.584	-1.044	0.407	0.551	1.229	1.47	0.548	-0.11	0.379	0.62	0.373
6416	-0.952	-0.85	-1.048	0.023	-0.057	-0.689	-1.063	0.047	-0.467	-1.082	-0.714	-0.823	-0.524	0.233	-0.823	-0.904	-0.761	-0.442	-1.13	-0.173	-0.743	-1.132	-0.64	-1.479	-0.411	-1.185	-0.823	-1.209	-0.504	-0.055	-0.654	-0.036	-0.665	-0.781	-0.319	0.006	0.279	-1.492	0.105	-1.137	-0.389	-1.014	-0.152	-0.756	-0.072	-0.961	-0.582	-0.655	-0.155
8856	1.061	-1.763	-0.595	0.31	-3.515	-2.052	-0.36	-0.184	-1.49	-1.047	-1.846	0.068	-2.137	-0.325	-1.703	-0.163	-1.574	-4.221	-1.224	-3.648	-0.711	-5.034	-0.069	-6.691	-5.418	-0.095	-4.591	-0.896	-2.218	0.278	-1.59	-0.375	-3.235	-0.857	-4.84	-4.766	-0.602	-0.185	-1.69	-0.676	-0.006	-6.456	-5.645	-0.032	-4.257	-0.476	0.15	-1.879	-2.464
51277	-0.106	0.471	-0.53	-0.869	-1.224	-0.324	-1.052	-0.277	-0.283	0	-0.082	0.393	-0.506	0.984	-0.187	0.688	-0.951	-0.364	-0.383	0.428	-0.307	-0.592	0.015	0.162	-1.159	0.045	-0.796	-0.604	0.657	0.067	0.029	-0.318	-0.561	0.219	0.265	-0.13	-1.387	0.611	0.101	-0.439	-0.349	-0.986	0.119	-0.283	0.613	0.047	-0.299	-0.104	-0.534
286191	2.018	1.018	0.234	0.31	-0.809	0.166	3.184	0.874	-0.128	-0.65	0.126	0.421	0.246	-0.795	0.075	-0.575	0.088	0.399	0.097	-0.469	-0.277	-0.263	0.063	-0.106	-0.671	-1.168	0.508	0.539	0.106	-0.035	0.178	0.518	-0.365	-0.295	-0.288	-0.485	-0.467	0.035	0.174	0.315	0.62	-0.174	1.199	-0.486	-0.319	-0.642	0.351	0.119	0.399
401459	0.051	0.276	-0.016	0.267	0.004	-0.685	0.272	-0.489	0.29	-0.587	-0.453	0.167	-0.359	0.06	0.127	0.123	0.11	0.108	-0.436	-0.103	-0.541	-0.45	0.088	0.074	-0.315	0.31	-0.193	0.118	-0.5	-0.027	0.361	-0.143	-0.481	-0.999	-0.116	0.201	0.103	0.065	-0.499	0.232	0.132	0.189	-0.033	-0.373	-0.529	-0.527	-0.456	0.174	0.174
285593	-0.184	-0.058	0.035	-0.081	0.255	-0.384	0.164	-0.861	-0.216	0.379	-0.573	-0.074	-0.168	-0.147	-0.056	0.171	0.134	-0.21	-0.296	0.226	0.115	-0.168	-0.11	0.235	0.052	0.135	-0.351	0.223	0.586	0.484	-0.198	-0.578	0.284	-0.269	-0.374	0.05	-0.102	-0.016	-0.544	0.542	-0.088	0.762	-0.229	-0.122	0.11	0.269	-0.391	-0.063	-0.144
5863	0.376	0.43	0.563	-0.181	0.174	0.343	0.268	-1.06	0.458	0.173	-0.179	0.278	1.97	0.55	-0.07	-0.711	-0.581	1.458	0.349	0.515	0.021	0.867	0.563	0.176	-0.139	1.282	0.943	-1.004	1.15	-0.148	-1.117	0.501	0.285	0.638	0.115	0.717	-0.485	0.373	-0.6	0.592	-0.439	1.264	0.78	0.979	-0.109	-0.392	0.635	0.095	1.53
10514	-0.681	0.308	-0.507	-0.013	0.152	-0.005	0.068	-0.316	-1.036	-0.11	-0.013	-0.273	-0.317	1.066	-0.182	0.107	-0.156	0.434	0.12	0.423	-0.238	0.183	0.312	-0.484	0.278	-0.001	0.453	-0.27	0.675	0.325	-0.407	-0.523	0.115	0.181	-0.527	-0.243	0.676	-0.764	0.253	-0.786	-0.438	-0.588	0.885	-0.032	0.493	-1.204	0.379	-0.319	0.376
123264	3.766	-1.111	0.153	2.201	2.972	0.831	0.413	1.756	0.901	1.188	0.202	0.208	0.747	-0.983	2.053	4.723	2.573	1.737	0.984	2.719	1.601	1.629	-1.329	2.057	2.902	0.67	1.242	-1.136	-0.255	0.53	3.083	-0.507	0.3	0.631	1.024	1.125	-0.183	2.076	2.045	2.388	1.301	0.173	0.563	2.977	0.338	2.886	3.274	3.233	1.22
730754	-1.113	-0.731	-0.363	0.227	-0.334	-0.557	-0.216	-1.074	-0.342	-0.616	-0.659	-0.421	-0.675	-0.391	-0.043	-0.28	-0.504	0.152	-0.686	-0.747	-0.582	-1.24	-0.726	0.393	-0.647	-0.394	-0.852	0.745	-1.151	-0.34	-0.35	-0.256	-0.819	-0.804	-0.679	-0.378	-0.264	-0.248	-0.278	0.78	0.358	0.938	-0.874	0.034	-0.392	-0.085	-0.93	-0.761	-0.4
153770	0.811	0.722	2.37	-1.438	0.192	-0.514	0.422	-1.054	-0.018	-0.358	-0.426	0.749	0.322	0.726	-0.005	0.678	0.44	0.747	0.087	1.985	3.076	0.544	0.506	0.663	1.12	1.392	1.633	1.479	-0.473	0.683	-0.234	1.703	2.728	-0.162	1.123	0.463	-0.048	0.589	0.609	0.288	0.822	-0.202	1.636	0.617	0.216	0.37	0.562	-0.037	-0.634
3250	0.456	-0.613	-0.268	-0.767	-1.135	-0.653	0.839	0.604	0.643	0.601	-0.853	0.494	-1.058	-0.762	0.81	0.382	-1.473	-4.314	-2.91	-1.101	-0.844	-0.731	0.931	-0.011	-1.927	-0.13	-3.276	1.446	0.922	1.018	-0.181	0.862	-1.883	-0.97	-1.843	0.058	0.897	-0.787	-0.73	-0.779	0.277	-1.364	-4.928	-0.77	-1.936	-1.078	-0.152	-0.085	-2.29
80163	-0.09	0.297	0.94	-0.19	-0.485	-0.622	-0.059	0.36	0.671	-0.089	-0.816	0.483	0.146	0.335	-0.763	-0.446	-0.466	-0.491	0.219	-0.239	-0.472	0.148	0.57	0.447	-0.781	-0.023	-0.764	0.745	1.208	0.329	-0.17	0.049	-0.682	-0.802	-0.285	0.788	-0.343	-0.704	0.305	-0.005	1.555	-0.369	-1.217	-0.741	-0.992	-0.585	0.145	-0.073	-0.764
9477	0.809	0.199	2.862	-0.869	1.753	0.65	1.295	1.059	0.793	-0.068	0.586	0.776	1.175	1.35	0.994	2.029	0.581	0.399	0.514	0.907	0.722	1.884	1.075	0.757	1.019	0.257	0.656	0.735	2.039	0.549	0.988	0.092	1.194	0.156	0.644	1.208	0.609	0.709	0.452	1.069	0.78	1.659	-0.013	0.256	0.338	0.151	0.262	1.517	0.208
7754	3.287	-1.314	0.079	0.408	-0.846	-0.064	2.333	2.581	-1.427	-0.579	2.73	-0.818	2.703	-0.264	-3.833	-1.195	1.885	1.672	2.551	-3.026	-0.577	1.247	2.079	-0.728	0.104	0.15	1.753	-1.364	-2.06	-2.172	-1.064	-0.046	-1.315	2.727	-1.514	1.155	0.262	1.604	2.477	-0.901	3.904	2.394	-1.58	-0.202	-0.683	0.465	0.784	2.499	1.209
339122	-0.079	-0.272	-0.248	0.068	-0.27	-0.31	0.631	-0.456	-0.657	-0.316	-0.759	-0.425	-0.651	-0.092	-0.065	-0.312	-0.321	-1.355	-0.856	-0.217	-0.622	-0.181	0.035	-1.325	-0.085	0.557	-0.505	-0.143	-0.585	0.044	0.161	-0.289	0	-0.534	-0.742	-0.723	0.326	-0.776	-1.401	-1.004	0.36	-0.609	-0.53	-0.447	-0.738	-0.743	0.043	0.078	-0.507
64116	0.033	0.222	-0.093	0.349	-0.085	0.031	0.188	-0.294	0.129	0.046	-0.36	-0.111	0.353	0.05	0.229	0.197	-0.059	-0.321	0.173	0.01	-0.465	0.095	-0.215	0.252	-0.077	0.447	-0.023	0.463	-0.073	0.311	-0.029	-0.126	-0.109	0.065	-0.09	0.057	-0.109	0.285	0.193	-0.092	0.331	0.064	-0.148	-0.584	0.006	-0.14	-0.6	0.025	-0.359
260429	-0.106	-0.028	-0.405	0.453	0.052	-0.556	-0.336	-0.777	-0.064	0.417	-0.793	-0.582	-0.751	0.155	-0.295	0.166	-0.958	-0.258	-0.121	0.069	-0.249	-0.082	-0.499	-0.079	-0.595	0.298	-0.275	0.227	0.12	-0.064	0.107	-0.487	-0.473	-0.39	-0.19	-1.098	-0.282	0.239	-0.347	0.257	-0.57	-0.033	0.142	-0.39	-0.453	-0.108	0.129	-0.421	-0.241
256112	0.775	0.617	0.343	0.222	0.003	1.474	0.336	1.129	0.433	-0.555	0.631	1.425	0.647	0.338	0.678	0.263	0.124	1.722	0.797	-1.261	0.702	0.641	0.847	0.315	-0.729	1.55	2.12	-0.83	0.033	-0.38	0.053	1.551	0.78	1.835	0.989	-0.36	-0.504	-0.108	1.211	1.222	0.03	0.463	1.529	-0.108	0.462	0.927	0.302	0.45	1.475
389856	-0.413	2.009	1.148	-0.757	1.326	0.595	-0.381	1.586	2.606	-0.236	0.278	-0.388	2.737	0.224	1.154	-0.525	0.458	1.247	-0.201	2.423	0.299	0.368	0.874	-1.276	-1.106	0.529	1.999	0.077	2.505	0.086	0.791	2.639	0.885	0.018	-0.421	1.51	1.032	0.04	-0.793	-0.444	0.764	-1.894	-0.182	0.666	1.568	0.389	3.173	0.623	1.437
2005	-0.005	0.107	0.728	-0.089	0.191	0.454	0.176	0.331	-0.774	-0.039	-0.117	0.426	-0.343	0.145	1.616	-0.13	0.543	-1.174	0.691	0.163	-0.119	1.104	0.631	-0.627	0.205	-0.473	0.366	-0.327	0.115	0.656	0.34	-0.374	-0.03	0.084	1.076	-0.402	1.269	0.819	-0.699	0.778	0.78	-0.256	-0.839	0.437	0.531	0.355	-0.689	0.763	0.726
400673	0.213	-0.191	0.997	0.934	-0.471	1.007	0.437	0.448	-0.116	0.824	0.064	0.482	0.254	0.253	0.728	-0.16	0.055	-0.716	0.464	-0.362	-0.538	1.2	-0.011	-0.154	0.308	0.971	-0.553	0.192	0.757	1.355	-0.394	1.171	0.238	0.54	0.318	1.057	0.648	0.217	0.048	0.783	1.266	0.437	0.36	0.949	0.269	0.017	0.998	0.701	0.841
8330	0.255	0.021	0.267	0.524	0.241	0.126	-0.186	-0.167	0.831	0.73	0.231	0.13	0.43	0.125	0.753	-0.244	-0.235	-0.281	0.136	0	-0.291	0.264	-0.285	0.075	-0.112	0.435	0.2	-0.42	0.256	0.325	-0.166	-0.566	-0.481	-0.453	-0.01	0.333	-0.262	-0.37	0.409	0.135	0.431	1.194	0.002	-0.259	-0.416	-0.795	-0.608	-0.084	0.231
3249	-0.047	-0.291	-0.857	0.324	0.438	-0.206	0.135	-0.778	0.018	0.192	-0.761	-0.154	0.062	0.663	-1.064	-0.733	-0.487	-0.617	-1.47	-0.261	-0.596	-0.49	-0.473	0.107	0.634	0.416	-0.686	-0.322	-0.443	0.165	-0.522	0.193	-0.651	-2.106	0.172	0.049	-0.959	-0.497	-0.172	-0.523	-0.164	-0.741	-2.299	0.032	-0.48	-0.746	-0.672	-0.173	-0.685
127602	0.234	0.053	0.945	-0.318	0.246	0.538	-0.021	-0.375	0.466	0.263	-0.547	0.324	0.932	0.435	0.643	-0.36	0.038	2.044	0.476	1.154	-0.11	-0.411	-0.225	-0.075	0.925	-0.073	0.257	0.633	-0.002	0.347	0.219	0.398	1.052	-0.303	1.012	0.923	-0.189	0.384	-0.365	-0.262	-0.243	0.997	-0.467	-0.19	0.145	0.015	-0.252	0.559	0.158
441124	0.204	0.031	-0.403	0.287	0.302	-0.318	0.122	-0.536	0.481	-0.139	-0.284	0.18	-1.158	-0.198	-0.06	-0.34	-0.085	0.187	0.02	0.197	-0.591	-0.338	-0.204	0.607	0.071	-0.044	-0.092	-0.066	-0.238	0.057	-0.143	-0.3	-0.216	-0.179	-0.318	0.43	0.019	-0.297	0.269	0.165	-0.103	0.229	-0.374	-0.566	0.249	0.215	0.215	0.023	-0.01
404281	-0.084	-0.36	-0.075	0.259	0.363	-0.099	0.471	-0.296	0.271	0.037	-0.957	0.177	-0.755	0.493	-0.187	-0.127	-0.922	-0.361	0.151	-0.067	-0.173	0.11	0.145	0.133	-0.196	0.046	0.219	1.223	0.828	0.204	0.188	0.167	-0.241	0.028	0.351	0.215	0.81	-0.211	0.349	0.786	0.637	-0.101	0.092	-0.141	0.327	-0.144	0.094	-0.253	-0.789
22874	0.088	2.266	-0.207	-0.311	0.575	0.273	2.697	0.057	1.243	2.501	-0.023	0.474	1.669	0.129	-0.369	0.005	1.91	0.638	0.555	-0.569	-0.598	-0.094	-0.488	0.245	0.36	0.539	-0.915	-1.274	0.796	1.185	1.436	0.756	-0.539	-0.181	1.114	0.608	-1.347	1.04	-0.189	1.282	0.416	2.219	1.182	2.305	-1.23	-0.799	-0.6	2.388	2.291
7738	1.12	0.324	1.64	0.98	0.671	0.102	0.482	-0.098	-0.246	-0.526	0.218	1.186	0.514	0.562	0.346	0.287	0.379	-0.204	0.244	0.146	1.213	1.316	1.258	0.32	0.245	1.123	0.283	-0.018	0.151	-0.288	0.217	0.034	0.18	0.397	-0.044	-0.3	0.62	-0.016	1.926	1.458	0.506	-0.122	0.048	0.248	0.477	0.173	0.465	0.2	0.899
64284	0.081	-0.602	-1.204	-0.022	-0.322	-1.46	-0.202	-0.521	0.246	-0.32	-0.84	-0.33	-0.708	-2.986	-3.195	-1.593	0.35	-1.493	-1.647	-1.493	-0.924	-1.223	-1.796	0.566	-1.485	-0.147	-2.383	-0.126	-2.339	-0.091	0.164	0.075	-2.121	-2.564	-0.516	-0.756	-1.259	-0.501	-1.383	-0.683	-0.953	-2.475	-3.897	-0.577	-2.449	-0.597	-0.715	-0.828	-0.79
3104	-0.228	0.05	-0.161	-0.157	-0.988	-0.813	0.884	-0.726	0.162	-0.117	-0.697	0.647	-0.519	-0.122	-0.919	-0.735	-0.575	-0.643	0.713	-1.133	-0.676	-0.53	-0.607	0.004	-0.554	0.485	-0.74	0.007	-0.512	0.492	-0.368	0.519	-0.252	0.049	-0.366	0.108	-0.776	-1.427	-0.344	0.637	0.12	-0.224	-1.232	0.613	-0.626	-0.141	-0.303	-0.664	-0.55
126868	-1.185	0.165	-1.224	-1.19	0.223	0.563	0.241	1.728	-2.092	1.038	-0.298	2.084	-2.011	0.328	-0.269	-1.728	0.433	-3.65	-2.1	0.283	0.589	-0.703	-0.265	-3.387	-1.31	1.43	0.98	0.047	0.356	0.771	1.307	-1.966	-0.502	-0.435	-1.32	-3.39	1.401	0.834	-3.071	-2.904	1.319	2.337	-0.739	-0.667	0.608	0.94	-0.274	0.852	-2.934
90835	-0.116	-0.145	-0.351	1.177	-0.93	0.345	0.177	-0.656	0.74	-0.714	0.646	-0.937	-0.671	-0.159	-0.537	1.091	-0.14	0.504	1.058	-0.63	0.189	-0.137	0.222	-0.446	-1.063	0.457	0.197	-0.51	-0.592	-0.287	-1.177	0.859	0.015	0.683	0.388	-0.61	-0.923	0.185	1.445	-0.541	0.156	0.739	0.064	0.325	0.664	0.368	0.086	-0.721	0.326
27443	-1.175	0.181	0.342	1.666	1.229	-0.864	1.852	0.833	1.043	0.146	0.202	0.861	0.208	1.162	0.294	1.301	0.801	0.424	-1.23	-2.228	0.067	0.759	-0.268	0.288	1.273	1.797	0.542	0.889	0.552	0.82	0.705	0.828	0.815	-0.617	2.343	-0.33	1.247	0.968	-0.302	0.344	0.932	1.046	0.439	1.904	0.172	0.553	1.209	0.96	0.354
23210	0.508	0.822	-0.114	-1.209	0.249	0.655	-0.151	0.735	0.588	-0.076	0.117	0.305	-0.296	0.028	1.501	0.242	1.428	-0.913	0.693	0.487	-0.238	-0.168	0.242	-0.747	-0.321	-0.308	0.014	-0.004	0.806	0.002	0.63	0.038	-0.215	-0.351	0.421	0.215	0.154	0.838	1.002	-0.272	0.379	0.319	0.95	0.173	1.48	-0.061	0.102	0.356	0.214
647869	0.738	2.421	-0.237	-0.188	-2.621	1.402	0.752	0.833	1.337	-1.032	-0.181	-0.504	4.013	1.182	0.681	-2.291	-0.235	4.85	0.139	0.886	1.256	1.064	1.267	-1.089	0.914	0.934	3.655	-0.756	-0.253	-2.868	-0.188	0.851	1.778	1.881	0.585	2.611	0.209	0.703	0.058	-1.871	-0.596	-0.588	1.842	1.404	0.335	1.595	2.747	0.481	2.724
7162	-0.865	-2.091	-2.643	-1.488	-1.123	0.883	-2.796	0.166	-3.616	-3.886	0.332	-2.455	-1.696	-1.809	-3.165	-3.667	-0.93	-0.274	-1.367	-3.009	-0.919	-1.769	-0.846	-2.318	-2.158	-2.306	-0.944	-3.741	-1.692	-2.869	-1.767	-0.843	-1.16	-0.64	-3.402	-0.985	-0.96	-3.147	1.125	-2.956	1.502	1.376	-0.32	-1.145	-0.231	-1.093	-0.104	-2.851	-1.227
285178	-0.148	2.035	0.585	0.622	-0.69	0.433	-0.293	-0.079	-0.148	-0.295	0.222	0.454	0.45	1.433	0.836	0.378	-0.31	1.226	0.491	3.385	0.946	0.626	0.141	1.764	-0.241	0.601	0.137	0.153	0.061	0.593	0.111	0.636	2.438	0.28	0.816	2.373	-0.053	0.368	1.167	0.623	-0.192	0.804	1.489	1.076	-0.386	0.603	0.35	0.591	-0.016
84224	0.084	0.666	-0.586	0.287	-0.51	-0.128	-0.413	-0.277	0.566	0.43	-0.185	-0.122	-0.629	0.606	-0.29	-0.649	0.873	0.013	0.236	-0.685	-0.376	0.473	0.169	0.061	-0.844	-0.056	0.572	-0.067	-0.193	-0.15	-0.237	-0.324	0.508	-0.011	0.024	0.384	-0.907	-0.279	0.376	0.502	0.131	-0.192	0.466	-0.246	0.431	-0.307	0.072	0.484	0.353
57703	-0.098	0.135	-0.054	0.346	0.189	-0.259	-0.428	0.013	-0.909	-0.473	-0.365	-0.057	0.675	0.224	0.083	-0.32	-0.234	0.128	-0.72	0.345	-0.275	0.32	-0.018	-0.079	-0.072	-0.428	0.54	-0.783	-0.371	-0.282	-0.334	-0.238	0.144	0.056	-0.693	-0.194	-0.018	-0.197	0.062	-0.54	-0.861	-0.97	-0.039	0.04	-0.055	-0.173	1.083	0.231	-0.05
79760	-0.814	1.024	0.106	-0.396	1.054	0.63	0.694	0.143	0.485	0.247	0.049	-0.002	0.39	0.52	0.807	-0.068	1.205	0.356	-0.108	1.474	0.394	0.58	-0.365	0.197	2.777	0.691	1.282	0.515	0.252	0.333	0.374	-0.313	1.038	0.462	0.002	0.378	0.705	0.073	0.265	-0.204	0.327	1.708	1.215	0.151	0.515	-0.353	0.164	0.731	0.735
55776	0.525	0.715	1.686	0.518	1.859	0.31	0.321	0.284	0.93	0.366	0.875	0.2	1.218	0.39	0.448	-0.793	0.598	1.033	0.103	1.594	-0.027	0.439	0.522	0.426	1.249	0.486	-0.065	0.353	0.592	0.76	0.396	-0.451	1.169	-0.222	0.947	1.298	0.165	0.388	-0.768	1.498	0.522	1.112	-0.018	0.012	0.145	0.178	0.088	1.503	1.029
64752	-0.802	1.66	0.173	1.029	-0.504	-0.137	-0.104	0.718	-0.547	0.217	0.363	0.312	-0.459	-0.505	-1.148	0.406	0.821	1.482	0.928	0.064	0.112	-0.522	-0.637	-0.007	0.347	-0.875	1.69	-0.113	0.008	-0.146	-0.233	1.74	0.941	0.622	-0.097	-0.361	-1.125	-0.774	1.225	-0.942	-1.321	0.542	0.83	0.493	0.735	-0.006	0.017	0.948	-0.882
57617	-0.001	0.635	-0.007	-0.333	-0.786	0.227	-0.053	0.203	-0.038	0.071	-0.387	0.24	-0.969	0.976	0.318	0.689	1.424	-0.618	0.477	0.364	0.372	0.262	0.129	-0.625	0.296	1.476	0.779	0.494	0.179	0.924	1.02	0.03	-0.178	0.501	1.222	-0.412	0.535	-0.24	-0.29	-0.71	0.042	0.135	0.138	0.682	0.788	-0.074	0.68	1.005	-0.001
2035	0.995	1.457	-1.261	1.121	-0.707	0.165	-0.978	0.315	1.567	-0.318	0.777	-1.566	0.609	-0.548	2.259	1.785	1.436	0.581	-0.624	-1.274	-1.381	1.004	0.743	-0.183	-0.363	-0.453	-0.432	-0.111	0.696	-0.994	1.103	1.47	-1.097	0.816	1.119	0.134	-0.553	1.234	1.243	-1.439	-1.653	1.043	0.116	-0.383	0.148	1.59	1.326	1.32	0.893
57534	0.076	0.07	0.434	-0.148	1.532	0.104	0.906	0.679	0.51	0.553	1.398	0.81	1.904	0.408	0.989	1.016	0.498	0.98	0.285	0.891	0.597	0.335	0.533	0.5	0.758	0.185	0.508	0.574	-0.196	-0.005	0.2	0.79	1.169	0.319	0.71	1.918	0.002	1.184	1.291	0.258	1.14	0.417	0.615	0.75	0.46	0.302	0.739	0.86	0.577
54578	0.011	0.162	0.229	0.023	-3.013	-0.111	-0.006	-0.818	-6.776	0.034	-0.259	0.352	-2.217	-0.238	0.076	-1.407	0.117	-0.822	0.015	-0.227	-0.208	0.013	0.131	-0.215	-2.647	-0.201	-1.273	0.345	-0.092	0.422	0.05	-1.064	-0.534	-1.313	-0.229	-2.395	0.44	0.006	-4.704	-0.455	-6.13	-2.257	-0.339	-0.547	0.065	-0.232	-0.034	-0.614	-4.03
25920	-0.3	1.207	-0.313	0.722	0.836	0.068	1.012	0.004	1.081	0.838	0.384	0.296	0.3	0.961	0.038	0.753	1.062	0.655	0.229	0.047	0.089	0.363	0.008	0.39	1.241	1.024	0.792	0.241	0.902	0.521	0.27	0.419	0.344	0.719	0.861	0.585	0.45	0.491	0.232	0.066	0.033	2.085	0.589	1.034	0.692	0.375	0.994	0.693	0.876
23270	0.046	-0.543	-1.188	0.446	-1.55	-0.458	-0.227	0.073	1.085	-1.032	-0.217	-0.183	0.83	-0.008	-0.17	-0.076	-0.557	0.743	0.529	0.065	0.747	-1.239	-0.18	1.558	-0.197	0.369	-0.631	-1.124	-1.065	-0.685	-0.874	0.181	-0.785	0.747	0.756	-0.338	0.008	0.511	-0.257	0.898	0.232	-0.506	-1.203	0.599	0.098	1.014	-0.068	-1.313	0.818
134	0.954	3.108	1.358	-0.065	-0.942	1.049	-0.721	-0.013	0.538	0.154	0.643	-0.269	-0.741	-0.201	-0.441	-0.509	-0.669	-0.006	0.805	1.077	-0.326	0.364	-0.951	-0.011	0.251	1.643	0.016	0.243	0.478	2.031	-0.226	0.027	-0.402	-0.416	1.173	-1.078	-1.096	0.645	-0.789	-0.138	-1.019	-1.3	-0.269	0.248	1.485	-0.309	-0.565	0.49	0.815
203076	0.258	-0.101	-0.213	0.195	0.265	-0.31	0.413	-0.795	0.402	0.27	-0.139	0.078	-0.081	-0.406	-0.052	-0.015	-0.063	-0.06	0.316	0.295	-0.42	-0.375	0.002	0.175	0.112	0.891	-0.179	0.219	-0.433	0.054	0.092	-0.798	-0.297	-0.726	-0.081	-0.142	0.277	0.301	-0.094	0.179	-0.015	0.632	0.293	-0.329	-0.043	-0.717	-0.277	0.03	0.057
389177	-0.192	-0.181	-0.107	0.433	0.259	-0.342	0.378	-0.12	0.068	-0.85	-0.274	0.328	0.098	-0.471	0.418	-0.529	-0.39	0.007	-0.569	0.199	-0.568	-0.96	-0.088	0.212	0.129	-0.742	0.251	-0.155	-0.252	-0.384	-0.113	0.235	-0.336	-0.561	-0.147	-0.19	-0.078	-0.221	0.059	0.465	0.182	0.178	0.319	-0.881	-0.93	-0.197	-0.532	0.098	0.744
649618	0.615	0.991	2.439	0.018	-0.126	3.569	1.829	3.687	0.536	-0.001	1.084	0.421	-0.513	-0.352	0.512	-0.178	3.111	0.143	4.545	0.428	0.292	0.078	0.136	0.374	0.815	0.905	0.478	0.211	-0.156	0.935	0.581	1.398	0.18	1.907	3.546	0.23	0.133	3.77	0.294	1.009	0.38	0.057	0.422	0.387	0.273	0.175	-0.402	0.934	-0.119
5738	-0.579	1.274	-0.175	-0.966	0.288	0.695	0.063	1.402	-0.425	0.831	1.594	-3.111	0.886	1.139	-2.767	-2.386	1.387	-0.1	-0.134	-1.033	0.508	1.938	0.798	0.496	1.02	0.19	1.589	0.721	0.323	0.973	2.212	0.264	1.118	-0.326	1.784	-0.174	0.293	0.757	0.623	-0.055	1.192	2.383	1.65	1.15	1.887	-0.025	1.277	2.114	0.493
10801	-0.115	1.721	-0.071	0.137	0.404	0.721	0.283	0.728	1.016	0.275	0.742	0.319	0.457	0.708	-0.168	-1.508	0.498	0.117	1.025	0.136	0.433	0.054	0.061	-0.726	0.002	0.94	0.417	0.82	0.877	0.384	0.552	0.118	0.534	1.232	0.849	0.187	-0.046	1.146	-0.261	-0.17	0.247	0.929	1.163	0.668	0.419	-0.139	0.506	0.343	1.124
23151	-1.277	-1.855	-1.696	-1.163	-1.027	-0.643	0.223	-0.907	-1.871	-0.791	0.343	-0.873	-1.355	-1.686	-0.174	-0.896	-1.286	-0.237	-1.39	-0.14	-1.44	1.036	-0.954	-2.161	-0.577	0.246	-0.331	-0.788	0.671	0.251	-0.19	-0.177	-0.205	-1.398	-0.777	-1.173	0.323	-0.532	-3.074	-2.126	-3.155	-2.405	-0.736	-1.725	-1.048	-1.97	-0.309	-1.275	-1.691
26998	-0.533	-6.164	-0.887	0.271	-3.198	-0.559	1.839	0.393	0.921	-0.799	-1.481	0.163	0.2	-0.291	-2.992	-0.643	-0.808	-1.707	-5.63	-1.548	-0.664	-4.688	-3.08	0.429	-2.477	0.007	-4.513	-5.007	-2.565	-3.692	-0.412	-0.591	-3.36	0.234	-1.663	0.169	-0.832	-1.847	-1.064	0.808	2.696	0.025	-4.667	-0.104	-5.163	-0.086	-2.475	-1.467	-2.803
339487	0.227	-0.173	0.529	-0.789	-0.058	0.36	0.764	0.015	-0.032	-0.045	-0.25	0.773	-0.289	-0.373	-0.187	-0.192	0.339	-0.644	0.121	-0.594	-0.264	0.61	0.628	0.338	0.057	0.238	0.293	0.246	-0.568	0.123	0.399	-0.464	0.602	0.218	-0.593	-0.772	0.486	0.088	0.795	0.758	0.912	0.081	0.686	0.097	0.782	0.282	0.147	0.844	-0.9
80184	0.503	0.584	0.979	1.25	-0.12	0.668	-0.576	0.595	0.766	-0.264	0.801	1.995	2.025	-0.035	-0.179	0.6	0.432	1.552	0.625	-0.186	0.366	0.246	0.107	0.646	-0.543	0.211	1.291	-0.667	-0.675	-0.45	0.313	2.365	-0.126	0.927	1.059	0.667	-0.059	0.175	1.786	1.29	0.221	0.938	1.396	0.955	0.249	0.11	0.313	0.562	1.272
10249	0.041	-2.276	-0.35	0.606	-2.764	-1.111	0.274	-0.805	-5.433	-1.014	-2.203	-0.045	-3.361	-1.123	-0.927	-0.876	-0.473	-6.406	-3.623	-6.22	-0.893	-0.714	-1.066	0.084	-6.482	-1.212	-5.658	0.76	-0.639	0.482	-0.878	-1.111	-1.662	-1.858	-3.172	-5.179	-0.089	-0.883	-1.49	-0.011	-0.122	-6.086	-6.335	-1.363	-2.036	-0.081	-1.442	-0.445	-6.137
84532	-1.674	-0.016	-0.999	-1.702	-0.156	0.237	1.409	1.059	0.458	-0.458	1.058	-1.271	-0.186	1.272	-0.107	-0.581	0.58	0.901	-0.193	1.58	0.281	0.459	-0.438	0.352	-0.071	-0.442	0.457	-0.145	-0.512	-1.063	0.746	1.004	0.882	1.792	1.347	-0.038	-0.528	0.001	1.448	0.323	1.232	2.724	1.603	1.357	-0.123	0.314	1.521	0.103	0.398
196707	-0.034	0.012	0.145	-0.31	0.287	-0.061	-0.131	-0.34	-0.312	0.632	-0.405	0.171	-0.391	-0.159	0.31	0.105	-0.091	-0.319	-0.392	-0.216	0.005	-0.369	-0.166	-0.036	0.054	0.106	-0.6	-0.636	-0.686	-0.006	-0.359	-0.517	-0.665	-0.327	-0.105	-0.058	0.393	0.426	-0.027	-0.01	-0.071	0.479	0.142	-0.404	-0.066	-0.346	-0.056	0.252	0.473
285398	-0.779	1.87	0.198	-0.023	0.346	0.304	2.668	-0.398	2.043	1.072	0.68	-0.127	1.183	2.263	0.125	1.132	1.817	2.965	1.728	0.328	0.495	1.004	1.268	1.45	0.53	1.444	0.926	0.485	2.095	0.473	1.459	0.56	0.07	0.942	0.434	0.779	-0.129	1.868	1.193	0.642	0.864	2.009	1.474	1.44	0.206	0.865	2.248	0.427	0.928
4052	-0.678	-1.276	-1.992	-0.57	-0.807	0.664	-1.477	-1.504	-0.529	-1.631	0.312	-2.27	-1.219	-0.301	-1.272	-2.883	-0.407	0.481	-0.086	-2.807	-1.07	-0.818	-0.24	-1.059	-0.618	-0.591	-0.139	-2.517	-0.546	-2.179	-1.703	-0.835	0.125	0.312	-1.551	-0.292	-1.632	-1.563	-3.481	-1.065	-1.091	0.429	-0.808	-0.639	-0.184	0.45	-2.891	-0.93	-0.146
23533	-0.326	-0.736	-1.001	-0.126	-1.555	0.554	-1.609	-0.818	-2.023	-0.894	0.518	-2.203	-0.534	-0.701	-0.769	-0.917	-0.857	0.585	-0.349	-0.548	0.281	-1.234	-1.055	-1.234	-0.785	-0.961	1.526	-1.682	-1.061	-0.681	-1.582	-0.125	-0.111	1.812	-1.434	-1.789	-0.639	-1.835	-0.286	-1.606	-2.528	-0.098	-0.124	-0.348	0.013	0.817	1.1	-2.352	-0.65
6614	-1.66	-1.779	-2.282	-0.34	-2.184	-1.007	-2.582	-1.229	-4.299	-1.022	-0.575	-3.375	-1.159	-0.991	-2.294	-2.46	-2.955	0.265	-1.609	-1.345	-1.098	-2.781	-2.789	-1.169	-0.171	-2.164	0.539	-2.081	-1.317	-1.209	-2.019	-0.267	-0.662	0.291	-3.396	-2.269	-0.779	-2.984	-1.128	-2.522	-4.224	-0.796	0.54	-1.712	-1.116	-1.123	2.18	-3.188	-3.075
317662	0.723	1.066	0.716	-0.052	0.983	-0.153	0.304	0.657	2.155	0.984	-0.348	-0.102	0.904	0.361	-0.333	1.332	-0.135	0.662	0.913	1.093	-0.034	0.44	0.898	-0.285	0.426	0.601	0.278	0.041	2.51	1.265	0.432	0.248	0.463	-0.309	1.099	0.75	0.702	0.507	-0.193	-0.189	0.716	-0.161	0.34	-0.625	0.785	0.718	0.13	1.232	2.689
5309	-0.034	-0.116	-0.163	0.484	0.448	-0.542	-0.757	-0.95	0.1	0.259	-0.663	0.187	-0.179	-0.079	0.446	0.055	-0.129	0.018	-0.08	-0.118	-0.511	-0.144	0.193	0.112	-0.115	0.37	0.076	0.184	0.21	0.423	-0.006	-0.537	-0.055	-0.423	-0.094	0.389	0.3	0.152	-0.313	0.432	-0.048	0.545	-0.235	-0.036	0.247	-0.535	-0.148	0.189	0.293
55643	-0.392	1.452	0.093	0.377	0.965	-0.486	0.509	-0.503	1.174	0.641	-0.221	-0.077	0.149	1.094	0.085	0.617	0.354	0.601	0.199	0.788	-0.148	-0.43	0.363	-0.605	0.654	1.297	-0.157	-0.139	0.317	0.724	0.003	0.237	-0.336	0.364	0.731	0.883	0.567	-0.341	-0.065	-0.645	-0.183	1.345	0.591	0.887	0.69	-0.284	0.132	0.749	0.921
10234	0.353	0.347	0.521	0.325	-1.229	0.039	-1.755	-0.102	-0.231	-0.303	-0.283	-0.03	0.855	1.367	-1.705	-1.584	-0.931	1.516	2.294	-0.116	0.871	-0.692	0.431	-0.633	-0.072	-0.67	-0.294	-1.617	0.585	-0.692	-1.7	2.313	-0.086	-0.371	-0.043	1.52	-1.944	-1.444	0.056	-0.963	-2.241	0.132	-2.391	0.635	0.33	2.243	0.279	-0.696	0.643
421	0.523	0.672	-0.847	0.016	-0.709	-0.609	-0.079	-0.074	-0.089	-0.033	-0.735	-0.314	0.536	-0.172	0.036	-0.541	-0.436	0.955	-0.285	-0.64	-0.577	-0.138	-0.182	-0.296	-0.687	-1.255	0.6	-0.228	-0.55	-0.755	-0.666	0.487	0.258	0.005	-0.571	-0.457	-0.608	-0.57	-1.134	-1.014	-1.423	-0.045	0.389	-0.483	-1.001	-0.481	0.405	-0.178	0.167
55766	0.891	-0.14	-0.898	-2.03	-0.027	0.657	1.432	0.361	-0.941	-0.446	-0.63	1.279	1.355	-0.537	0.091	2.032	0.342	-0.272	-1.146	-0.589	0.479	0.844	0.89	0.077	0.859	0.486	0.907	0.501	1.951	2.075	-0.521	0.968	-0.18	-0.116	0.022	0.381	0.54	-0.17	-0.89	-0.205	1.042	-1.275	0.045	0.001	0.122	-0.1	-0.436	0.157	0.237
126432	0.665	-1.519	0.515	0.603	-0.291	1.174	0.709	0.248	-0.418	4.141	0.644	-1.21	0.808	0.495	1.434	3.029	0.241	0.449	-1.564	-0.133	1.32	4.14	0.908	3.392	1.103	2.06	0.598	-0.297	0.139	0.101	0.193	0.581	0.837	-0.004	3.112	-0.246	0.972	0.372	-1.415	3.155	-0.38	0.705	1.346	-1.978	-1.749	0.931	2.052	-1.906	2.002
649299	0.351	0.053	-0.019	0.733	0.022	0.056	0.371	-0.773	-0.399	-0.342	-0.719	-0.231	-0.035	0.208	0.463	-0.155	0.136	0.47	0.267	0.329	0.185	0.133	0.255	0.145	0.249	-0.876	0.179	0.103	0.185	-0.113	0.148	0.035	0.137	0.039	-0.214	0.637	0.027	0.015	-0.179	0.512	-0.322	-0.522	0.235	-0.471	-0.268	-0.295	0.472	0.283	0.841
7301	0.176	2.81	-0.339	-0.966	0.511	0.885	1.204	-0.433	0.087	-0.4	0.683	-0.401	0.424	0.086	0.315	0.106	0.823	0.488	0.798	1.352	-0.775	-0.457	-0.149	-0.672	2.025	-0.466	2.84	-1.108	0.344	-1.184	0.079	-0.232	1.427	-1.307	2.058	0.987	-0.385	0.891	-0.053	-0.035	-2.49	3.785	3.701	-0.439	-0.07	-0.576	2.415	2.301	1.371
54964	0.737	2.236	-0.978	0.39	0.775	-0.607	1.6	0.858	1.279	1.298	-1.988	0.783	0.968	0.167	0.866	0.574	0.724	-0.41	1.383	-1.194	-0.926	0.222	1.245	-1.044	-0.239	0.86	-1.599	0.564	-0.22	0.481	0.864	0.025	-0.786	-1.106	2.36	1.377	1.84	0.493	-0.093	1.523	1.669	0.942	-2.078	0.53	0.27	-0.074	-0.84	1.65	2.043
60436	-0.583	0.658	-1.188	-1.044	0.754	1.634	-0.189	-0.675	1.492	0.778	0.451	-0.899	1.287	1.095	1.297	0.915	-0.121	1.109	0.68	1.973	0.309	0.135	0.306	0.032	1.912	-0.088	1.107	-0.012	0.881	-0.645	0.366	0.791	1.053	0.195	0.863	1.33	0.072	0.948	-0.671	-1.049	-0.824	2.005	0.91	-0.795	-0.94	-0.016	0.004	0.114	-0.09
2932	0.947	0.357	0.874	0.891	0.761	-0.377	0.305	0.367	0.633	0.201	-0.613	-0.002	0.12	-0.63	-0.389	0.258	0.724	-0.514	0.658	-1.049	-0.398	-0.469	0.808	-1.991	-0.151	0.453	-0.066	0.123	0.059	0.576	0.026	-0.121	-0.638	-0.141	0.495	-0.466	0.185	0.441	-0.053	-0.15	1.006	-0.275	-0.221	0.773	-0.999	0.601	0.402	0.861	0.148
2890	0.173	-0.193	-0.029	0.527	-0.861	-0.718	-0.291	-0.441	-0.331	0.32	0.325	-0.354	0.109	-0.154	-0.032	-0.297	-0.285	-0.507	0.11	0.031	-0.527	-0.435	-0.316	-0.02	-0.214	0.398	-0.198	-0.195	-0.2	0.258	-0.74	0.009	0.161	-0.819	-0.079	-0.567	0.067	0.143	-0.919	0.226	-0.08	-0.282	0.011	-0.01	-0.457	-0.409	-0.42	-0.138	-0.184
4521	1.189	1.101	1.33	-0.056	0.987	1.43	0.735	1.494	1.666	0.723	0.787	0.101	-0.087	-0.113	0.241	1.443	1.178	1.085	2.498	1.067	1.034	1.023	0.802	1.301	1.083	0.809	1.685	0.154	1.426	1.09	0.192	0.701	0.651	1.372	0.731	0.911	0.401	1.445	1.588	1.433	1.054	0.731	1.897	0.917	0.707	1.661	1.342	0.466	0.8
3624	0.743	0.095	0.199	1.239	0.786	0.825	0.341	0.525	-0.843	3.186	1.292	0.402	-0.132	-0.793	-0.967	1.965	2.373	0.328	0.633	-2.216	1.563	-0.134	0.809	1.026	2.357	1.735	-0.352	0.708	1.11	1.322	0.278	0.833	0.655	1.244	-2.598	1.617	-1.143	-0.567	0.089	-0.139	-1.631	1.804	-0.859	2.372	-0.067	-0.246	-0.539	3.018	0.472
5459	-0.019	-0.025	0.058	0.444	0.073	0.059	0.63	-0.494	0.068	0.103	-0.242	-0.074	-0.573	-0.085	0.305	0.085	-0.664	-0.255	-0.306	0.6	-0.409	-0.23	-0.347	0.022	0.196	0.253	-0.531	-0.41	0.231	-0.036	0.27	-0.868	-0.361	-0.452	-0.015	-0.421	-0.095	-0.236	0.161	0.263	-0.226	-0.539	0.381	-0.337	-0.295	-0.773	0.583	-0.015	0.301
11065	2.945	3.974	3.838	1.981	2.963	4.693	3.818	3.903	3.673	2.358	3.523	2.404	2.262	2.289	3.369	5.101	3.845	3.885	3.831	4.676	3.567	2.542	2.331	3.317	4.789	2.226	3.97	1.297	2.825	1.505	3.489	2.478	4.01	4.036	3.039	3.897	2.856	4.831	3.389	3.866	1.865	3.193	4.421	1.536	3.175	2.325	2.449	1.611	5.314
1284	0.899	0.537	1.086	-0.977	-0.05	2.311	-0.638	0.952	1.016	0.982	1.988	0.388	1.309	1.081	-0.196	1.033	1.113	2.704	1.643	1.24	1.027	1.384	1.318	0.812	-0.436	0.127	1.416	-1.155	1.291	0.534	0.468	1.514	1.32	2.006	0.335	1.369	-1.047	0.727	0.483	0.203	-1.85	-0.111	0.679	1.544	3.056	2.07	0.915	0.923	0.806
3050	-0.108	-0.047	-0.079	-0.372	0.343	-0.083	-0.165	-0.17	0.238	0.27	-0.627	-0.178	-0.07	-0.145	0.191	-0.094	0.053	-0.526	-0.232	-0.016	-0.559	-0.133	-0.576	0.015	0.356	0.166	-0.523	-0.386	-0.15	0.016	0.209	-0.811	-0.513	-0.736	-0.427	-0.214	-0.419	0.305	-0.701	0.182	-0.395	-0.283	-0.188	-0.77	-0.029	-0.777	-0.339	-0.513	-0.097
1965	-0.747	0.159	0.091	-0.477	0.25	-0.416	-0.186	0.178	0.433	-0.284	0.087	0.369	0.021	0.166	1.188	0.41	-1.465	0.347	0.317	1.172	-0.382	0.773	0.329	-0.079	0.311	-0.594	0.661	-0.434	-0.096	0.64	0.345	-1.725	0.149	-0.333	0.086	-0.116	-0.052	0.241	0.411	-0.987	-1.71	-1.563	-0.764	-0.161	0.385	-0.97	-0.266	-0.289	-0.344
6390	-0.195	-1.341	-0.156	-0.58	-0.891	-0.721	0.19	-0.364	-0.463	-0.134	-0.769	-0.305	-1.644	-0.934	-0.307	-1.054	-0.067	-2.142	0.13	-1.33	-1.005	-0.074	-0.067	0.255	-0.882	-0.076	-1.037	-0.001	-0.721	0.099	0.4	-0.959	-0.802	-1.327	-1.238	-1.178	-0.006	-0.716	-1.02	0.19	-0.067	-3.478	-0.892	-0.683	0.249	0.053	-0.216	-0.6	-1.793
55184	1.067	0.5	-0.174	-0.67	-0.765	0.316	0.373	0.813	-0.182	-0.012	0.578	-0.332	-1.241	-0.087	-0.388	-0.613	-0.057	-0.017	1.463	-0.273	0.677	-0.13	0.091	0.773	-0.096	1.089	-0.578	0.049	0.168	-0.058	-0.155	0.706	-0.482	0.086	0.379	-1.01	-0.133	0.469	0.977	1.138	0.573	0.201	-0.478	0.484	-0.372	-0.047	0.752	-0.434	-1.082
729425	0.055	0.265	0.067	-0.161	0.06	0.02	-0.308	-0.667	0.315	-0.031	-0.475	-0.091	-0.676	0.256	0.142	-0.169	-0.432	0.126	-0.281	-0.01	-0.481	-0.444	0.44	0.034	0.28	0.293	-0.677	-0.367	-0.298	-0.072	0.016	-0.425	-0.133	-0.844	0.168	0.315	-0.079	0.408	0.009	0.37	0.055	1.202	-0.166	-0.569	-0.637	0.099	-0.616	0.104	-0.165
27434	0.7	0.28	0.146	-0.361	-0.089	0.091	0.622	0.524	1.035	1.207	-0.137	0.101	0.538	0.774	-0.255	0.378	0.022	0.361	0.858	0.149	0.055	0.464	0.517	-0.074	0.134	1.021	0.32	0.352	0.849	0.549	-0.212	0.563	0.301	0.948	0.718	0.634	0.137	0.584	0.346	0.847	0.134	0.526	0.976	0.963	-0.121	0.212	0.568	0.17	0.993
53	-0.69	-0.927	-0.507	0.471	0.589	-0.782	0.264	-0.246	0.542	0.197	-0.554	-0.383	0.139	-0.546	-0.69	-0.091	-0.102	-0.106	-0.703	-0.382	-0.235	-1.052	-0.707	0.08	1.086	-0.071	0.011	-0.353	-1.192	-0.205	0.233	0.072	0.476	-0.436	0.13	-0.281	0.459	-0.816	-0.519	-0.151	-0.319	-0.025	-0.603	0.481	-1.622	0.017	-0.025	-0.563	0.193
527	-0.095	-1.001	0.031	-0.247	-0.223	0.538	0.193	-0.036	-0.182	0.386	0.047	-0.177	0.458	0.259	0.286	0.113	-0.363	-0.425	0.001	0.15	0.157	0.266	-0.233	-0.177	-0.327	0.254	0.686	0.144	0.045	0.418	-0.744	-0.949	-0.161	-0.069	-0.453	-0.588	-0.067	0.306	0.116	-0.122	0.279	-1.201	-0.348	-0.148	-0.016	-0.532	0.326	-1.123	-1.158
57167	-0.171	1.57	0.692	0.133	1.636	-0.65	0.573	-1.368	2.788	0.338	-0.388	-1.156	1.886	0.345	0.437	-0.377	-0.61	2.569	0.779	-0.054	0.871	-0.125	-0.478	-0.918	2.436	-0.865	2.216	-0.849	-0.028	-0.48	0.195	0	2.048	0.305	1.341	2.086	0.405	1.621	1.296	1.019	1.041	3.961	0.574	-0.104	-0.038	-0.34	0.041	0.38	2.573
51073	-0.235	-0.338	-0.105	-0.136	-0.298	-0.621	0.618	-0.597	0.361	0.214	-0.643	0.086	0.113	0.136	0.455	0.701	-0.076	-0.257	-0.438	0.076	-0.567	-0.613	-0.263	0.137	0.41	0.154	-0.341	0.397	-0.079	0.477	0.081	0.023	0.003	-0.206	0.257	0.213	0.504	0.181	-0.105	0.058	-0.09	0.362	0.154	0.115	0.005	-0.725	-0.628	0.051	0.142
2307	0.413	0.982	0.296	-0.252	-0.113	2.673	-0.225	-0.399	0.341	0.333	1.538	0.06	1.257	0.624	-0.158	0.036	0.677	2.778	1.63	-0.055	1.312	0.942	0.749	0.314	0.022	-0.185	0.766	-0.386	0.967	0.43	0.626	0.743	1.255	0.746	0.202	1.815	0.598	-0.274	-0.556	0.397	-0.548	0.456	0.168	0.478	2.645	0.809	0.156	0.752	1.551
146443	-0.203	-0.033	0.216	0.622	0.525	-0.543	0.258	-0.416	-0.182	-0.292	-0.63	0.33	0.209	-0.278	-0.18	0.54	-0.124	-0.054	0.215	0.187	-0.164	-0.708	-0.702	-0.39	-0.163	0.375	-0.42	0.168	0.034	0.328	-0.332	0.038	-0.557	0.513	0.136	0.067	0.727	0.241	0.275	1.046	0.165	-0.731	-0.078	0.096	0.854	-0.353	-0.648	-0.179	-0.254
54962	0.836	0.96	1.557	-1.437	0.792	0.105	1.215	0.954	0.147	0.876	0.89	1.365	-0.157	-0.153	0.73	2.096	1.543	0.421	2.117	0.513	0.775	1.387	0.458	1.042	0.126	0.065	1.241	0.517	0.615	0.549	1.229	0.945	1.185	1.143	1.058	0.371	0.556	1.376	1.224	1.641	1.444	0.61	0.48	0.596	0.055	0.665	0.928	1.887	0.763
26153	-0.105	-1.031	-0.616	-1.302	-0.98	-0.42	-0.678	-0.183	0.178	0.365	-0.037	-0.954	-0.263	0.422	-0.301	-0.375	-0.494	-0.271	-0.66	0.391	-0.158	0.739	-0.502	-0.358	-0.926	0.188	0.136	-0.296	0.543	-0.73	-0.685	-0.011	-0.119	-0.476	0.612	-0.355	-0.741	0.216	-1.228	-0.061	-0.666	-0.37	-0.782	-0.211	-0.576	-0.231	-0.768	-0.305	-0.32
10656	0.096	1.41	1.192	0.83	0.521	0.909	-1.253	0.3	0.6	-0.121	-0.521	0.108	-0.777	1.907	0.152	1.454	0.314	0.796	1.367	-2.664	1.109	1.06	1.457	-0.667	0.837	-0.848	1.215	-1.191	1.189	1.136	0.736	-0.215	0.916	0.604	-0.899	-1.126	0.443	1.939	-0.664	-1.513	-0.451	-0.583	0.538	-0.17	0.44	-0.062	2.473	-0.002	0.545
64850	-0.047	-3.42	0.284	1.355	-1.745	-2.144	-0.302	-1.196	1.213	-0.376	-1.347	-0.57	-3.126	-3.802	-2.088	0.526	-0.1	-3.714	1.376	-2.348	-0.773	-2.391	-2.248	0.425	-4.354	-0.533	-4.835	-0.547	-2.104	-0.589	-1.202	0.075	-4.022	-0.006	-2.105	-3.566	0.574	-0.434	-2.994	-0.852	-0.944	-3.075	-4.365	-0.754	-1.066	1.402	-0.944	-1.845	-3.69
57669	0.427	0.998	0.381	1.518	0.904	-1.095	0.691	-0.009	-0.542	0.095	-0.679	0.711	0.411	-0.181	0.055	0.189	0.974	0.598	0.952	0.527	-0.286	-1.003	-0.213	0.277	0.603	-0.968	-0.536	0.142	-0.106	-0.069	-0.309	1.212	-0.26	-0.506	0.59	1.073	1.097	0.095	0.747	0.672	-1.016	-1.627	-0.196	1.015	-0.811	1.352	-0.916	1.078	-0.685
3920	0.871	-0.54	0.569	0.839	-0.562	0.399	-0.127	0.077	-0.731	0.922	1.142	0.904	-0.033	-0.75	-0.744	-0.604	0.261	-0.296	-0.05	-0.105	0.123	0.757	-0.607	0.833	-1.336	1.251	-0.028	-0.328	0.365	0.832	0.683	0.68	-0.78	-0.77	0.304	-0.248	0.288	0.746	0.315	1.872	0.263	-1.847	-0.317	-0.151	0.352	0.726	-0.706	0.622	0.386
401472	-1.478	1.12	0.094	-1.404	1.392	0.805	1.181	1.493	0.919	1.655	-0.447	-1.579	1.023	-0.466	2.321	1.097	2.064	-0.274	0.169	1.239	0.454	0.74	2.298	-0.749	1.993	2.488	1.947	1.033	-0.422	1.683	1.224	0.194	1.296	1.021	-0.7	0.7	0.107	2.065	-0.424	-1.959	0.46	1.443	0.518	1.352	-0.031	-0.05	1.828	1.415	0.227
80714	0.001	0.167	0.087	-0.428	-0.718	0.493	-0.767	-0.575	-0.863	0.511	0.351	-0.319	0.243	-0.103	-0.285	-0.469	-0.364	-0.174	-0.477	-0.551	0.64	-0.303	-0.322	-0.091	-0.651	-0.048	0.422	0.242	-0.07	-0.458	-0.762	0.464	-0.173	1.078	-0.728	-0.473	-0.066	-0.236	-0.113	-0.591	-0.813	0.548	-0.417	-0.465	-0.832	0.321	-0.003	-0.357	-0.242
3149	-0.1	0.503	0.248	0.272	1.262	-0.004	0.865	0.715	-0.093	0.003	0.464	-2.157	-1.026	2.098	-1.97	1.311	1.467	-0.198	-0.338	-3.003	-0.462	1.936	0.242	2.247	0.659	-0.57	-0.647	-0.472	0.329	-1.902	0.947	0.599	-0.857	-0.226	1.759	-0.247	0.22	1.35	-0.129	1.17	-0.512	1.668	-0.429	0.194	0.512	-0.785	0.649	0.783	-0.586
64167	0.586	0.808	0.678	0.312	-0.854	-0.224	-0.697	-1.656	-2.417	-0.758	0.268	0.314	-0.079	-0.954	-0.763	0.881	-1.074	-0.015	0.277	-1.128	0.54	-1.257	-0.228	0.067	-0.908	-0.659	0.283	1.079	0.322	-0.144	0.105	1.531	0.044	0.993	1.342	-0.465	0.086	0.162	0.6	1.981	-0.069	0.812	-0.555	0.416	0.842	0.741	-0.228	-0.162	-0.071
440823	-0.486	-1.347	-0.683	-0.958	-2.052	2.162	-1.68	-0.084	-2.313	-0.108	1.593	-0.614	-0.223	-0.945	-0.037	-1.66	-1.552	0.771	-1.754	-0.137	2.314	-0.814	-1.261	0.088	-1.16	-0.42	0.194	-0.906	-0.322	-1.32	-1.04	0.469	0.502	4.907	-0.809	-2.04	-0.629	-0.843	0.573	-2.128	-0.987	1.493	-0.161	-0.512	1.824	2.314	0.412	-2.359	0.136
623	0.319	1.097	0.49	0.712	-0.004	0.352	2.267	4.206	-0.305	1.162	0.358	-0.198	0.19	0.485	-0.22	-0.322	0.442	0.761	0.443	-0.171	-0.288	0.451	-0.71	-0.11	0.264	0.664	0.953	-0.996	0.01	-0.361	0.359	-0.136	-0.697	-0.305	-0.884	-0.528	-0.808	1.677	0.474	-1.543	1.953	0.684	0.053	1.709	0.091	-0.401	-0.48	-0.843	0.232
574449	-1.901	-1.419	-1.125	-0.53	-1.007	0.009	-0.185	-0.891	1.079	0.305	0.602	-0.572	1.248	-1.407	-0.209	-0.552	-0.394	-0.451	-1.12	0.474	-1.313	0.204	-0.352	-0.724	-0.451	0.224	-0.56	-1.265	-0.984	-0.813	-0.583	-1.282	-0.894	-0.991	-1.435	0.034	-1.475	-0.445	-1.865	-2.175	-2.128	0.276	-0.824	-0.469	-0.786	-0.807	-1.676	-0.307	-0.349
4134	0.151	1.02	-0.03	-1.773	-0.183	1.247	-0.652	0.073	0.326	0.237	1.148	-0.528	0.646	0.258	-0.104	0.371	0.771	1.026	0.647	0.363	0.251	1.062	0.762	-0.863	0.593	0.175	0.715	0.317	1.356	0.025	0.224	0.291	1.291	0.908	0.133	0.603	0.368	0.5	0.031	-0.641	0.031	1.414	0.817	0.606	1.044	0.353	0.855	0.997	0.881
55808	-0.443	-0.885	-0.565	-1.141	-1.502	-0.288	-1.053	-0.022	-0.815	-0.453	-0.676	-0.769	-1.075	-0.23	-0.673	-1.261	-1.755	-0.965	0.46	-0.649	-0.627	0.07	-0.935	-0.187	-0.894	-0.589	0.034	-0.018	-1.003	-0.923	-1.035	-2.14	-0.977	-0.89	-2.019	-0.984	-1.02	-0.873	-0.019	0.014	-0.129	-0.675	-0.425	-1.704	-0.621	-0.816	-0.884	-1.136	-0.423
256329	0.242	-0.454	-0.719	0.742	-0.181	-0.809	0.264	-0.173	0.859	-0.04	-0.913	0.303	-0.376	-0.232	-0.44	0.149	0.145	-0.529	0.175	-1.231	-0.873	-0.481	-0.237	-0.162	-0.754	0.438	-1.176	-0.04	-1.518	0.639	-1.002	0.539	-0.827	0.468	0.527	-0.357	0.331	-0.301	0.152	-0.264	0.802	0.287	-0.511	-0.547	-0.96	-0.466	-0.22	-0.352	0.266
399827	-0.027	-0.055	0.043	0.038	0.133	-0.332	1.192	-0.721	0.681	0.606	-0.773	0.252	-0.413	-0.348	0.004	0.11	-0.357	-0.477	-0.389	0.416	-0.239	0.064	-0.096	-0.047	0.02	6.038	-0.49	-0.242	0.002	0.385	-0.216	-0.255	0.149	-0.159	0.532	0.317	0.01	-0.134	0.18	-0.393	-0.045	0.424	-0.013	1.259	-0.268	0.025	-0.208	0.197	-0.108
140880	-0.033	-0.155	-0.126	0.396	0.241	-0.139	-0.568	-0.04	0.232	0.088	-0.316	0.103	0.092	-0.218	0.344	-0.029	0.099	0.123	-0.113	0.146	-0.299	-0.082	-0.074	-0.34	0.318	-0.273	-0.269	0.038	0.138	0.055	0.249	-0.415	-0.247	-0.332	-0.168	0.089	0.182	0.149	-0.157	0.114	-0.275	0.498	0.056	-0.24	0.032	-0.437	-0.129	-0.002	0.184
286223	-0.06	-0.09	0.59	-1.27	-0.072	0.655	0.062	0.514	-0.699	0.266	0.723	0.277	-0.179	0.073	-0.076	-0.776	0.165	0.037	0.035	0.012	-0.78	-0.944	-0.495	2.863	-0.332	-1.341	0.028	-0.541	1.052	-0.272	-0.121	0.97	0.288	0.51	0.165	0.7	-0.377	1.842	-0.261	-1.736	-0.211	-0.721	-0.487	-0.743	1.355	0.996	1.066	0.021	-1.185
80736	-0.8	0.442	-0.131	-0.294	-0.231	-0.212	1.158	0.444	2.068	0.214	2.23	-0.232	-0.134	-1.01	0.542	-0.497	0.842	-0.314	3.286	-0.045	0.486	-0.726	0.241	-2.191	1.135	0.463	-0.76	1.799	0.95	1.223	-0.403	2.048	0.584	-0.287	-4.228	0.402	-0.402	-0.178	0.182	-0.644	0.452	0.275	-1.065	-0.145	0.816	-0.292	-1.594	0.625	-0.095
4287	-0.078	-0.116	0.294	0.601	0.706	-0.241	-0.508	0.152	-0.474	0.341	-0.165	0.5	0.387	0.298	0.444	-0.338	-0.859	-0.092	0.805	0.403	-0.457	0.205	0.386	-0.534	0.717	-0.031	0.071	-1.319	0.028	0.256	0.655	-0.314	0.066	-0.45	-0.204	-0.716	-0.091	-0.574	0.034	-0.005	-0.553	-0.365	-1.022	0.081	0.639	0.063	-0.252	0.512	0.927
4838	0.054	0.556	0.12	0.121	0.83	-0.125	0.842	-0.442	0.381	0.371	-0.137	-0.093	0.212	-0.015	0.477	-0.112	-0.117	-0.227	-0.277	0.624	0.176	0.045	0.004	-0.076	0.059	0.601	-0.076	-0.052	-0.173	0.353	-0.323	0.187	0.325	-0.67	0.2	0.848	0	-0.203	0.154	0.423	-0.026	-0.066	0.186	0.142	-0.269	-0.935	0.21	0.256	-0.038
27201	0.207	-0.129	0.058	-0.285	0.15	0.043	-0.097	-0.145	0.157	0.419	-0.281	0.159	-0.337	-0.102	0.391	-0.039	0.076	-0.168	0.186	0.235	-0.374	-0.023	-0.078	-0.137	-0.205	0.183	-0.275	0.016	-0.36	0.376	0.361	-0.536	-0.332	-0.541	-0.094	0.026	0.373	0.186	-0.435	0.416	0.09	-0.608	0.172	-0.335	-0.27	-0.294	-0.006	-0.14	-0.297
9121	-0.812	-0.362	-1.384	-0.539	1.553	-0.96	-0.99	-0.294	-0.05	-0.162	-0.797	-1.604	-0.752	-0.478	-0.807	-0.404	-0.88	1.105	-0.661	-0.599	-0.675	-0.911	-0.93	-0.69	-1.562	-1.117	-0.042	-1.153	-1.496	-0.777	-0.427	-0.331	-0.187	-0.814	-0.975	1.575	-0.809	-1.361	-1.055	-2.008	-0.658	1.873	-0.76	-0.262	-1.334	-0.654	-0.524	-0.321	0.068
283592	-0.2	-0.246	-0.693	0.656	-0.209	-0.255	-0.152	-0.434	0.237	-0.213	-0.288	0.07	-0.473	-0.089	-0.015	-0.064	-0.078	-0.551	-0.206	-0.106	-0.249	-0.153	-0.339	-0.188	-0.048	-0.098	0.43	0.477	0.107	0.191	-0.22	-0.287	0.35	-0.187	0.124	-0.064	0.376	-0.032	-0.166	-0.091	-0.244	0.799	-0.087	-0.033	-0.033	-0.153	-0.617	0.269	0.444
7805	0.191	-1.081	-1.143	-1.207	-0.572	1.035	-1.361	-0.233	-2.398	-1.798	1.402	-2.993	-0.597	-1.102	-0.385	-0.94	-0.084	0.675	-0.349	0.452	0.737	-0.551	-0.716	-0.415	-0.029	-2.196	1.687	-1.782	-0.654	-0.863	-1.715	-1.422	0.594	0.849	-2.931	-1.66	-0.218	-1.103	0.073	-1.053	-2.86	-1.788	0.232	-1.454	0.291	0.56	1.813	-2.714	-1.508
1282	1.127	1.291	1.202	-0.149	0.041	1.949	-0.621	1.903	0.021	1.201	1.809	0.637	1.529	1.279	0.082	0.775	0.961	2.29	1.682	1.808	1.241	1.374	1.114	0.551	-0.126	0.413	1.468	-1.109	1.131	0.358	0.361	1.807	1.145	2.387	0.308	0.912	-0.386	0.962	0.945	0.342	-1.363	-0.232	1.347	1.8	2.512	2.048	0.538	1.373	1.835
5319	1.252	-0.142	1.249	1.127	0.419	0.767	3.235	0.022	5.937	-0.26	2.809	-1.122	3.515	-0.152	1.333	0.675	2.242	-0.807	5.317	6.04	0.65	2.649	1.648	-1.154	1.267	-1.167	1.374	1.312	2.056	0.237	0.631	2.626	0.304	0.924	0.711	4.34	2.109	1.582	-0.032	1.83	5.105	-0.454	0.497	1.006	0.591	-0.157	4.507	1.83	-0.015
5028	-0.273	0.285	-0.804	-0.402	-1.407	0.275	-0.226	-0.747	-2.563	-0.848	0.04	-1.548	-1.041	0.228	-0.117	0.134	-1.226	0.109	-0.772	0.327	-0.25	0.973	-1.174	-0.402	-1.863	-0.145	1.037	-1.099	0.352	-1.568	-0.36	-1.925	-0.257	0.067	-2.164	-0.955	-1.119	-0.398	-0.195	0.579	-2.318	1.091	-0.564	-0.706	0.192	-0.01	0.839	-0.821	-1.198
58527	-0.846	-0.903	-0.765	-0.086	-0.764	0.054	-1.133	0.017	-1.897	-1.355	-0.173	-1.63	-1.951	0.339	-1.961	-3.214	-1.293	-0.669	0.079	-2.419	0.458	-2.594	-0.278	0.128	-0.933	-1.445	-0.442	0.216	-1.916	-0.507	-1.888	-1.443	-0.623	0.405	-1.117	-2.438	-0.185	-2.36	-1.631	-0.305	-0.301	-3.123	-0.962	-1.381	-0.852	0.649	1.594	-1.156	-2
402377	0.394	0.485	1.337	-0.506	1.772	0.054	1.447	0.419	1.71	-0.002	-1.393	1.837	0.1	0.189	1.032	1.265	-0.033	-0.793	2.164	0.256	0.335	0.805	-0.22	1.526	-0.33	1.264	0.087	0.428	0.082	0.908	0.891	0.119	-0.568	0.516	1.433	0.511	1.186	1.393	1.084	2.384	1.174	0.566	-1.049	0.957	0.476	0.322	0.963	0.221	1.292
84070	0.76	0.046	0.043	0.221	0.525	-0.355	-0.275	-0.284	0.387	0.372	-0.713	0.266	-0.45	0.113	-0.397	0.49	-0.771	-0.208	0.1	-0.474	0.348	-0.101	0.025	0.231	-0.372	0.666	-0.384	0.655	-0.184	0.899	-0.311	0.2	-0.47	-0.813	0.102	0.257	0.237	-0.114	-0.031	0.396	0.354	-0.546	0.131	0.17	0.409	-0.652	-0.219	0.182	0.188
1259	-0.534	-2.376	-1.065	0.796	-0.928	-4.093	0.224	-1.287	1.395	0.434	-2.172	-2.096	1.14	-1.017	-1.236	-0.529	-3.21	-0.614	-3.625	-0.146	-1.563	-5.432	-3.538	0.205	-2.768	0.463	-5.062	-3.707	-2.278	-3.888	-1.027	-0.332	-1.854	-5.363	-0.122	1.483	-2.202	-0.943	-1.41	-1.967	-1.309	-4.522	-6.413	0.008	-5.052	-1.102	-2.559	-2.478	-0.437
9019	0.499	1.62	1.102	0.399	0.292	1.036	-0.375	0.977	0.758	1.181	1.762	0.111	0.59	0.167	0.558	0.012	0.69	0.815	1.01	1.504	0.853	1.59	0.945	-0.287	0.934	0.069	0.908	0.313	0.481	0.758	0.819	-0.549	1.156	0.229	0.806	0.371	0.705	1.703	0.096	0.777	0.266	0.203	1.072	0.053	1.065	0.368	0.083	1.787	2.513
84081	-0.242	-0.723	0.013	0.379	0.024	0.096	-0.462	-0.182	-1.063	0.792	-0.247	0.58	-0.011	-0.304	0.452	0.668	-0.332	-0.235	-0.089	-0.441	-0.091	0.706	0.298	0.085	-1.374	-0.281	-0.043	0.266	-0.053	-0.065	-0.242	0.254	-0.312	-0.366	-0.334	-0.324	-0.058	0.381	-0.787	0.159	-0.453	-3.151	-0.61	-0.764	0.327	-0.345	0.046	-0.358	-0.671
54797	-0.112	-0.461	0.304	1.669	-1.253	-0.623	0.075	-0.073	0.348	2.155	-0.079	1.254	-0.658	0.842	-1.341	0.397	-0.212	-1.553	-0.303	-1.038	0.608	0.412	-0.284	-0.063	-0.19	1.268	0.641	1.154	-0.57	0.503	0.291	-0.344	-0.304	-1.518	0.328	-1.534	0.853	-0.567	0.328	1.397	-0.256	-0.367	0.03	0.25	0.133	-0.116	0.108	-0.709	1.736
79848	0.217	0.487	1.444	-0.635	1.844	0.469	-0.525	0.299	0.212	0.086	0.955	0.808	0.413	0.654	1.843	1.523	0.13	1.093	-0.697	0.59	0.592	2.375	1.053	0.306	0.76	-0.728	1.723	0.555	2.217	1.25	-0.202	0.576	1.69	0.091	0.886	1.958	-0.441	1.237	0.141	0.643	0.131	0.577	1.881	-0.346	0.066	0.17	0.98	0.421	0.305
338657	0.09	0.522	-0.12	-0.269	-0.495	0.481	-0.262	0.36	-0.809	-0.209	0.006	0.884	0.197	-0.084	0.1	0.046	0.409	0.793	0.507	-0.699	-0.002	-0.166	0.031	0.576	-0.094	-0.479	0.492	0.093	-0.297	-0.909	0.066	1.234	0.113	0.866	0.711	0.586	-0.737	0.307	1.385	-0.239	-0.247	1.968	0.171	-0.583	0.453	0.57	-0.294	0.626	0.041
4085	1.935	1.106	3.964	0.408	2.308	0.986	1.814	3.352	1.548	1.556	2.092	1.522	1.169	1.531	2.344	2.171	2.932	2.074	3.035	2.544	2.684	2.413	1.061	3.665	2.384	1.099	3.406	0.696	2.144	1.293	0.593	1.691	2.527	2.652	0.581	1.663	1.33	2.861	3.936	2.881	1.312	-0.016	2.602	-0.007	1.666	1.926	2.122	-0.034	1.775
90288	2.142	-0.834	0.121	2.857	-2.507	2.927	1.322	-0.917	-0.333	-0.922	-1.932	-0.836	-0.868	-2.126	-0.613	-1.677	-0.968	0.998	0.506	-1.364	-2.071	-2.025	-0.51	-2.924	-1.049	0.254	-0.036	-0.912	2.966	3.616	-2.912	3.213	-1.738	-3.198	-1.01	-1.603	-1.149	0.741	-1.131	1.472	-1.203	-2.769	-0.804	-1.378	2.182	0.262	0.581	-1.471	0.07
140775	-0.331	-0.041	0.152	-0.069	0.139	-0.573	-0.283	-0.704	0.609	0.259	-0.501	-0.402	-0.584	0.106	-0.312	-0.006	0.318	-0.523	-0.33	-0.31	-0.867	-0.151	0.203	0.584	-0.793	0.313	-0.726	-0.46	-0.954	-0.065	-0.217	-0.627	0.281	-0.086	0.671	-0.221	0.351	0.06	-1.085	0.306	-0.004	-0.584	-0.306	-0.331	0.327	-0.556	0.183	0.183	-0.484
150160	-0.121	-0.114	-0.096	0.269	0.068	-0.641	0.26	-0.558	0.041	-0.038	-0.605	-0.068	-0.547	0.036	0.215	0.147	-0.522	-0.189	-0.319	-0.294	-0.381	0.024	-0.292	0.354	0.031	0.708	-0.339	0.224	-0.408	0.496	0.095	0.043	-0.568	-0.518	-0.132	-0.465	0.121	0.069	-0.428	-0.056	-0.094	-0.13	-0.126	-0.034	0.017	-0.019	-0.245	-0.056	0.183
30835	-0.154	-0.245	-1.551	-1.422	-1.325	-1.108	-1.016	0.628	-2.057	-0.66	-0.502	-1.6	-1.642	-0.502	-1.986	-0.493	-1.555	-0.34	-1.851	0.14	-1.566	-0.58	-0.607	-1.389	1.368	-1.248	1.284	-0.228	-0.274	-1.023	-0.764	-0.779	0.157	-0.839	-2.254	-0.897	-0.657	-0.935	0.202	0.463	-2.125	-0.557	1.109	-2.022	-0.505	-0.733	3.355	-1.586	-0.888
54825	-1.74	-1.027	-4.362	-1.873	-3.911	-1.674	-2.329	-3.858	-1.155	-2.416	-1.722	-5.981	-1.497	-4.474	-0.911	-6.759	-4.768	-3.021	-6.305	-2.786	-2.631	-5.497	-2.527	-5.987	-2.86	-6.269	-4.029	-0.47	-4.109	-5.655	-6.501	-2.244	-2.874	-3.659	-5.842	0.461	-5.004	-6.142	-6.735	-5.674	-0.789	-1.489	-5.962	-3.84	-5.36	-6.105	-0.804	-5.144	-4.966
51308	0.006	0.051	-0.1	0.169	0.638	-0.489	-0.372	-0.836	0.748	0.069	-0.711	0.065	0.279	-0.106	0.547	-0.112	-0.248	0.147	-0.645	0.254	-0.297	0.345	0.37	0.3	0.346	-0.065	-0.135	0.276	-0.394	-0.113	-0.253	-0.522	0.329	0.228	-0.217	0.535	0.618	-0.339	-0.485	0.642	0.11	0.511	0.215	-0.369	-0.143	-0.243	-0.315	-0.111	-0.196
55997	0.02	-0.186	0.116	-0.078	0.017	-0.223	0.32	-0.31	0.243	0.483	-0.216	0.069	0.04	-0.055	0.308	-0.104	-0.117	-0.211	-0.426	-0.082	-0.179	-0.518	0.025	-0.024	0.074	0.257	-0.136	0.345	-0.154	0.274	-0.181	-0.093	-0.203	-0.352	-0.011	-0.145	0.163	0.004	-0.323	0.116	-0.189	0.357	-0.199	-0.204	-0.202	-0.542	-0.098	-0.288	-0.005
57148	-0.059	0.58	0.72	-0.116	0.377	0.907	0.518	0.514	0.62	0.381	0.263	0.346	0.062	-0.547	0.688	0.335	0.86	-0.052	0.854	0.823	0.057	0.14	0.409	-0.131	0.526	-0.394	0.84	0.018	0.124	0.238	0.431	0.228	0.93	0.865	0.733	-0.102	0.669	1.449	0.383	0.347	0.975	0.927	-0.177	0.055	0.056	0.545	-0.054	0.426	0.209
3985	-0.751	0.578	0.157	-0.946	-0.307	0.643	-1.2	1.205	-1.665	0.089	1.73	-0.519	0.488	1.149	0.146	0.754	1.559	0.06	-1.038	0.794	1.89	1.066	-0.127	-0.969	1.374	0.232	1.059	0.424	-0.013	-0.388	1.363	1.082	1.457	1.313	1.118	-0.981	0.528	0.795	-0.205	-0.872	-0.97	1.872	1.254	0.9	0.449	-0.679	-0.379	1.288	1.506
144699	1.107	0.023	-0.465	0.691	-0.105	0.073	-0.114	-0.268	-0.843	0.052	0.145	-0.278	-0.55	-0.28	-0.196	-0.25	0.714	-0.202	-0.041	0.218	0.119	-0.018	-0.253	-0.362	-0.428	-0.373	-0.42	0.072	0.281	0.225	-0.99	0.194	-0.556	0.46	-0.767	-0.431	0.009	-0.264	-0.345	0.607	0.531	-0.899	-0.371	0.192	-0.155	0.207	0.507	-0.215	-0.038
5970	-0.003	-0.157	-0.396	-1.018	0.104	-0.472	0.204	-0.267	-0.246	0.425	0.399	-0.578	0.073	0.465	-0.199	0.277	0.232	-0.577	0.792	0.404	-0.029	1.462	0.642	0.12	0.317	1.386	0.269	0.394	-0.059	0.582	0.086	-0.705	-0.07	-0.421	-0.205	0.222	0.429	-0.257	0.368	-0.362	0.196	0.072	-0.248	-0.068	0.409	0.074	0.073	0.115	-0.93
148229	0.624	1.348	2.518	0.843	-1.306	1.607	-0.393	2.058	0.336	0.938	1.283	-0.679	-0.97	-0.475	1.174	1.255	0.834	-0.121	1.418	0.9	0.635	-0.191	-0.491	0.752	-1.162	-1.391	0.938	0.973	0.014	0.99	-0.035	0.68	0.875	1.481	2.603	0.086	0.624	1.601	1.379	1.934	0.509	-1.027	2.538	1.057	-0.037	1.316	2.432	0.231	0.031
9754	0.405	-0.206	0.242	-0.181	-0.558	-0.177	-0.403	-0.705	0.493	-0.455	-0.272	-1.579	-0.205	1.008	-1.642	1.569	-1.421	-0.694	0.006	-0.319	0.068	-0.803	-0.312	0.736	-1.308	-0.235	0.206	-0.564	1.472	-0.032	-0.437	-0.402	-0.171	-0.645	0.098	-1.111	-1.074	0.826	0.829	-0.473	-0.213	-2.774	-0.035	0.424	-0.278	0.086	0.827	0.068	0.05
23590	0.829	0.555	0.834	-0.506	1.168	0.845	-0.303	1.053	0.639	1.29	-0.116	-0.726	1.428	0.528	-0.412	0.328	1.466	0.557	-0.07	1.144	0.739	1.033	-0.055	0.051	1.278	0.079	2.058	0.131	0.846	-0.155	0.225	0.317	1.566	1.081	-0.179	0.04	0.17	0.784	-0.269	0.74	0.153	1.062	1.819	1.791	0.132	0.085	0.207	1.682	1.196
10243	-1.351	0.796	-0.329	0.137	-0.846	-1.418	-0.007	-0.844	-0.902	-0.292	-1.113	0.748	-0.822	-0.101	-0.568	-2.184	-2.831	-1.344	-0.362	-0.824	-1.633	-0.767	-1.618	-1.144	-0.695	-0.247	-1.418	-0.898	0.301	0.985	-0.604	-1.126	-1.219	-2.325	-1.056	-0.593	-0.407	-1.95	-1.468	-1.066	-0.3	-2.858	-2.216	-1.133	0.101	-1.443	-0.957	-1.007	-0.79
164592	-0.188	-0.116	0.254	-0.204	-0.133	-0.178	0.515	-0.803	-0.348	-0.338	-0.512	-0.174	-0.153	-0.115	0.685	0.105	0.212	-0.432	-0.65	-0.082	-0.383	0.024	0.08	0.499	0.285	0.412	-0.378	-0.404	0.045	0.521	0.214	-0.809	0.054	-0.2	0.638	-0.135	0.498	0.094	0.133	0.04	-0.587	0.59	-0.112	-0.112	0.285	0.205	-0.44	0.034	0.06
728875	-0.171	-0.218	0.492	-0.273	-0.038	-0.075	-0.155	0.044	0.225	-0.322	-0.048	0.302	0.478	0.012	0.065	-0.274	-0.113	0.093	0.028	-0.022	0.247	-0.045	0.011	-0.304	0.317	-0.249	-0.703	0.497	-0.36	-0.253	0.14	-0.284	-0.157	-0.712	0.092	0.083	-0.196	0.35	-0.287	0.864	0.075	-0.383	0.15	0.019	-0.006	-0.35	0.207	-0.088	0.191
117157	-0.887	-2.661	-0.921	-0.029	-1.945	0.649	-0.761	0.621	-0.888	0.606	-0.245	-1.77	-1.224	0.142	-2.471	-0.399	-1.912	-1.648	-2.232	1.346	0.986	-0.693	-1.276	-0.346	-0.34	-0.523	-1.29	-0.114	-1.206	-0.261	-1.795	-0.748	-0.483	0.037	-0.222	-0.784	1.121	-1.955	-0.912	-0.279	-0.41	-0.663	-1.685	0.156	-1.286	-0.892	0.13	-2.191	-1.123
55686	1.385	-0.727	0.586	1.4	0.761	-0.926	1.118	0.14	0.623	-0.431	-0.629	1.705	0.693	-0.7	-0.284	0.365	0.477	-1.535	0.857	-0.681	0.564	-1.393	0.222	1.694	-0.538	0.356	-0.688	-0.194	-0.162	0.151	-0.151	1.871	-0.266	0.712	0.575	0.403	0.353	-0.506	1.302	1.927	0.343	0.095	-1.38	1.074	-1.654	1.426	-0.992	-0.151	0.62
646119	-0.276	-0.103	-0.407	-0.506	0.591	-0.784	-0.046	-0.099	-0.328	0.261	-0.511	0.191	0.155	-0.123	1.037	-0.361	0.106	0.213	0.062	-0.185	-0.452	-0.111	0.095	-0.03	1.202	0.007	0.541	-0.563	0.084	0.172	0.319	-0.321	-0.007	-0.526	-0.507	-0.228	0.403	-0.068	-0.042	-0.054	0.173	2.819	0.922	-0.343	-0.358	-0.361	-0.943	-0.073	0.699
1203	-0.317	-1.69	-0.967	0.017	0.16	-1.214	0.85	-1.144	0.346	-0.183	-0.581	-0.281	-0.638	-0.518	-0.227	-1.105	-0.747	-0.158	-0.978	0.217	-0.793	-1.231	-1.207	0.686	-0.677	-0.546	-1.579	-0.248	-0.365	-0.352	0.269	-0.242	-1.27	-0.417	-0.895	-0.506	-0.57	-0.841	0.031	0.285	-0.696	-0.818	-1.745	-0.019	-0.738	0.122	-0.816	-1.056	-0.317
677828	0.021	0.172	0.232	0.159	0.58	-0.534	0.282	-0.948	0.309	-0.497	-0.658	0.343	0.176	0.053	0.456	0.317	0.199	0.451	0.122	-0.296	-0.166	0.256	-0.219	0.486	0.128	0.789	0.106	0.695	-0.221	0.551	0.076	-0.543	0.123	-0.517	-0.28	0.137	-0.375	0.649	-0.414	0.573	0.273	0.697	0.323	-0.589	0.014	-0.675	0.309	-0.213	-0.275
89884	-0.396	0.22	0.344	0.147	0.33	0.257	0.248	-0.493	0.39	0.039	-0.395	0.232	0.726	0.115	0.304	0.081	0.78	0.495	0.468	-0.023	0.283	0.115	0.163	0.193	0.195	0.364	-0.353	0.965	1.287	0.25	1.069	0.229	0.122	-0.195	0.297	-0.161	0.162	2.177	-0.01	0.558	0.633	-0.103	0.682	0.334	1.293	-0.371	1.313	0.463	0.957
944	0.39	0.116	-0.194	-0.579	-1.824	1.38	-0.232	-0.138	-1.957	-0.892	1.021	-0.347	-1.05	-0.696	1.055	0.223	-0.946	-0.59	-0.327	0.247	1.012	-0.243	-0.104	-0.916	-0.801	-0.575	0.158	-0.212	-0.448	-1.557	-0.456	-0.478	0.512	1.672	-0.741	-1.272	-0.776	-0.336	0.054	0.379	-0.918	-0.384	0.365	-0.873	-0.335	0.924	1.734	-2.121	-0.932
5972	-0.364	0.537	1.54	0.72	2.832	0.205	2.977	-0.152	1.815	1.11	-0.586	3.013	-0.246	4.122	0.476	0.541	1.311	1.989	0.276	-1.398	0.601	-0.419	1.952	0.874	0.405	0.465	-1.442	-0.021	-0.055	3.841	0.574	2.357	3.104	0.167	2.122	1.855	0.379	0.564	-0.636	3.4	0.429	-0.448	-0.205	0.693	2.35	0.978	-1.13	0.264	-0.36
79805	1.575	1.073	1.63	-0.411	1.761	1.642	1.257	3.101	1.323	0.281	0.305	0.808	0.722	-0.251	-0.634	-0.5	1.7	1.067	2.602	-0.161	1.25	0.99	1.142	0.078	0.807	-0.204	0.442	1.657	1.111	1.311	2.885	2.815	0.695	0.2	-0.066	-0.112	0.653	1.17	0.928	1.92	2.365	1.046	0.114	0.674	1.49	0.643	1.685	0.797	0.303
6575	-0.807	0.346	0.484	0.127	-0.112	0.387	-0.701	-0.354	0.246	0.745	-1.376	0.68	0.805	-0.056	0.149	0.12	-0.046	0.231	0.144	-0.54	-0.466	0.55	0.773	-0.625	-0.87	0.644	-1.627	1.881	1.18	0.335	0.007	-1.064	-0.979	-1.562	-0.756	0.356	1.123	0.689	-1.519	-1.47	-1.38	-1.827	-2.822	0.428	-1.024	-1.083	-1.034	0.045	1.661
23411	0.675	-0.172	0.097	1.335	-0.944	-0.654	-0.056	-0.551	-0.701	-0.565	-0.169	0.703	0.162	0.3	0.398	-0.155	-0.955	-0.553	0.659	-0.268	-0.068	0.624	0.447	0.082	-0.459	0.406	-0.51	-0.35	0.328	0.113	0.45	0.347	-0.385	-1.104	0.253	-0.043	-0.356	-1.167	0.432	-0.199	-0.176	-1.289	-0.573	-1.05	-0.479	0.118	-0.014	-0.244	-0.191
4303	0.347	0.312	-0.245	0.044	0.028	-0.017	1.423	-0.718	0.215	0.836	0.253	0.5	0.508	1.246	0.07	0.102	0.659	0.026	0.92	-1.36	-0.658	1.267	0.42	0.523	-1.76	3.298	-0.031	0.472	1.433	0.839	0.942	1.206	-0.64	0.006	0.973	-0.158	0.086	0.607	-0.563	0.627	1.349	-2.152	-0.643	0.483	0.848	0.576	0.544	-0.154	-0.367
83849	0.336	-0.507	0.401	-0.312	0.739	-0.214	-0.263	-0.509	-0.038	0.059	-0.419	-0.054	0.501	-0.025	0.67	-0.419	-0.311	-0.125	-0.498	0.055	-0.07	0.018	0.207	-0.467	0.569	0.072	-0.097	-0.069	0.949	-0.301	-0.32	-0.628	0.441	-0.663	-0.636	0.576	0.119	-0.36	-0.631	0.407	-0.088	0.069	-0.328	-0.578	-0.215	-0.754	-0.148	-0.46	0.242
541467	0.061	-0.273	-0.482	0.616	0.111	-0.087	-0.442	-0.217	0.128	-0.276	-0.528	0.089	-0.196	-0.015	-0.026	-0.019	0.224	-0.457	-0.161	-0.154	-0.507	-0.09	-0.233	0.401	0.238	0.457	0.695	0.315	-0.408	0.16	0.007	-0.304	-0.13	-0.311	0.105	0.366	-0.037	0.149	-0.322	0.459	-0.327	0.096	0.176	-0.422	-0.189	-0.564	-0.476	-0.089	-0.102
1646	0.635	-0.256	0.727	0.374	1.281	0.269	-0.883	0.724	-1.963	-0.87	0.185	0.447	-0.748	0.033	0.005	-0.34	0.561	-2.094	0.798	0.393	0.346	0.663	0.594	-0.418	-3.691	0.464	-0.059	1.519	0.14	0.979	0.313	-1.361	-1.583	0.028	0.879	-0.957	1.077	0.405	-1.647	0.494	0.113	-0.545	0.185	0.054	0.835	0.369	0.497	-0.23	-0.336
7554	-0.752	0.011	0.286	0.588	0.932	0.897	0.672	1.678	0.279	0.494	0.86	0.539	-0.012	0.133	0.537	0.493	1.127	-0.016	0.237	0.811	0.355	1.532	-0.796	0.378	2.163	0.872	1.283	-0.249	-0.121	0.546	1.201	-0.324	0.915	0.867	3.627	0.185	0.46	0.941	0.238	0.721	-0.53	1.347	0.742	0.51	0.446	0.898	0.835	1.425	1.21
254359	0.039	0.048	0.485	0.263	-0.123	0.426	-0.253	-0.1	-0.075	-0.032	0.127	0.036	-0.588	0.013	-0.005	0.15	-0.118	0.099	0.284	-0.312	-0.248	0.407	-0.292	-0.259	0.015	0.551	0.405	-0.377	0.056	-0.174	-0.294	-0.2	0.324	-0.105	0.045	-0.431	0.343	0.43	0.149	0.406	0.042	0.314	0.93	0.478	0.912	0.466	0.36	-0.379	0.041
128611	-0.589	-1.601	-0.64	0.037	-2.491	1.492	-0.712	-0.529	-0.938	0.105	1.082	-1.09	-0.813	-0.844	-0.04	-0.844	-1.116	-0.436	-1.311	-0.686	1.349	-0.775	-1.158	-0.615	-1.485	-0.363	-0.697	-0.53	0.103	-0.827	-1.656	-0.256	-0.414	2.659	-1.322	-2.168	-1.312	-1.624	0.176	-1.932	-0.865	-0.867	-1.283	0.119	0.948	0.239	0.321	-2.234	-0.777
389257	-0.327	0.195	-0.037	0.447	-0.016	-0.176	-0.264	-0.234	-0.234	-0.361	-0.41	0.083	0.042	0.346	-0.355	-0.018	0.183	-0.12	-0.166	-0.143	-0.301	-0.078	-0.183	0.028	-0.04	-0.321	-0.201	-0.172	-0.764	-0.068	-0.145	-0.743	-0.668	-0.391	-0.54	0.066	-0.457	0.137	-0.566	0.239	-0.126	0.341	0.129	-0.312	-0.285	-0.602	0	-0.041	0.253
388564	-0.256	0.083	0.094	0.194	-0.616	-0.172	0.995	-0.37	0.151	1.494	-0.786	-0.079	-0.625	-1.041	-1.185	-0.291	-1.272	-0.978	-0.32	-0.261	-1.398	0.562	-0.457	0.88	-1.214	0.697	-2.139	0.168	-0.38	0.661	-1.111	-0.346	-0.087	-0.578	0.921	-0.405	-0.77	0.46	-1.569	0.477	0.011	-1.289	-0.854	-0.23	-1.571	-0.316	-0.01	0.621	1.179
8313	-0.466	3.057	2.749	-1.655	0.854	0.321	1.13	-0.291	-1.934	-0.567	0.451	2.784	-0.069	0.948	1.777	-3.053	-0.795	-0.402	-0.56	-0.383	0.011	-0.515	1.93	0.043	-2.244	2.282	-0.783	4.316	2.44	1.643	-0.522	-0.991	-0.089	0.017	-1.293	-1.233	2.032	-1.891	-2.268	-0.78	-3.282	-1.184	-0.521	-1.614	3.162	-0.045	-2.105	0.158	-1.69
113451	0.456	0.339	-0.094	0.049	-0.528	0.402	-0.068	-0.135	1.153	-0.034	-0.037	-0.068	-0.276	0.051	0.235	0.105	0.319	-0.188	0.401	-0.6	-0.054	-0.365	0.43	0.265	-0.158	0.433	-0.644	0.282	-0.419	0.093	0.35	-0.151	0.131	0.121	-0.248	0.019	0.155	0.429	-0.37	-0.189	0.239	0.833	0.401	0.372	0.179	-0.384	-0.406	0.012	0.054
23644	-1.177	0.702	-0.168	-0.47	-0.176	0.234	0.109	0.558	0.414	0.178	-0.308	0.384	-0.438	0.526	0.533	0.163	0.58	-0.159	0.16	0.239	0.288	-0.428	0.123	-0.285	0.717	0.199	-0.305	0.435	0.831	0.481	-0.403	0.495	0.213	0.333	-0.078	0.206	0.127	0.158	0.133	-1.792	0.615	0.908	0.586	0.195	0.922	-0.7	0.343	0.051	-0.036
5175	1.022	-1.576	0.212	-1.405	-0.868	1.018	-0.397	0.139	-0.989	-0.727	0.963	-0.562	-0.301	1.474	0.377	0.58	-0.856	1.301	-0.223	1.77	0.717	0.684	0.385	0.263	-0.186	0.085	0.818	-0.81	1.402	0.435	-0.98	0.649	1.064	1.502	-1.368	-0.221	-0.339	-1.128	0.547	0.912	-0.242	-2.265	-0.31	0.749	1.564	1.248	0.717	-0.547	-0.166
387119	-0.656	-1.207	-0.32	-0.056	-1.217	0.818	-1.839	0.164	-0.382	-1.938	0.552	-0.66	-0.865	0.323	-0.78	-1.592	-0.4	0.03	-0.387	-0.77	0.503	-0.667	-0.508	-2.299	-0.311	-1.208	-0.189	-0.909	-0.842	-0.048	-0.513	0.732	-0.17	1.893	0.111	-1.125	-0.129	-1.064	-0.476	-0.59	-0.696	-0.863	-0.408	-0.081	0.604	0.652	-0.421	-0.286	-2.053
643637	0.315	0.234	-0.027	-0.168	-0.369	0.109	0.173	0.937	-0.607	-0.52	-1.02	1.002	-0.197	-0.64	-0.129	1.273	0.007	-0.063	0.101	-0.443	-0.676	-0.729	0.39	0.475	-0.216	-1.293	-0.7	2.375	-1.836	4.255	-1.291	-1.026	0.159	-0.142	1.737	-0.454	1.3	-0.792	-1.533	-0.401	2.107	-0.052	-0.311	0.854	0.37	1.424	1.827	3.331	-0.625
6294	-0.774	-0.597	0.156	-1.752	0.302	-0.16	0.42	0.074	0.322	0.796	0.863	-0.298	-0.31	0.457	0.454	0.546	-0.35	-0.33	-0.377	0.493	0.169	0.62	-0.135	1.144	0.779	0.661	-0.489	0.395	1.25	0.852	-0.159	-0.041	0.438	-0.222	0.67	0.576	0.094	-0.065	-0.074	-0.439	0.36	-0.264	0.021	0.035	-0.127	-0.457	-0.283	0.466	-0.755
55622	0.092	1.058	1.134	-0.113	1.29	0.123	-0.191	-0.438	0.088	0.172	-0.21	0.798	0.479	0.779	0.756	0.289	-0.334	0.577	1.199	1.246	0.323	-0.002	1.141	0.164	0.611	-0.26	0.47	0.373	0.746	0.651	0.082	-0.622	0.772	-0.63	0.528	0.207	0.541	0.913	0.553	0.096	0.087	-0.347	0.626	0.225	0.448	-0.416	0.618	0.358	0.641
55848	0.071	-0.707	1.406	0.162	-0.669	-0.099	0.579	0.301	0.747	0.779	0.026	0.477	-0.078	-0.235	0.642	-0.44	0.257	-0.422	0.744	0.029	0.334	-0.742	-0.427	1.276	-0.014	0.151	-0.196	0.271	0.052	0.598	-0.816	-0.361	-0.287	0.561	0.171	-0.196	0.375	1.284	0.357	-0.219	0.485	-1.258	-0.687	0.128	0.212	0.626	0.637	-0.311	0.187
1477	0.14	-0.086	0.356	0.872	0.283	-0.263	-0.013	-0.008	0.543	-0.292	-0.543	0.993	-0.264	0.129	0.413	0.585	-0.174	-0.16	0.293	0.377	0.027	0.114	-0.083	0.114	0.143	-0.053	-0.349	0.081	-0.669	0.247	-0.173	0.147	-0.195	-0.189	0.457	-0.28	1.027	0.353	0.372	0.854	0.052	0.452	-1.085	-0.38	-0.269	-0.063	-0.298	-0.1	0.382
9717	-0.194	0.579	0.586	0.258	3.127	0.643	1.354	-0.565	2.132	0.597	-0.379	0.847	1.539	0.498	-1.368	1.784	0.32	0.115	2.001	3.714	0.115	0.157	0.445	0.346	1.138	0.938	-0.174	-0.24	0.77	1.023	-0.466	-0.217	-0.459	-0.071	1.076	0.804	0.148	1.719	0.205	0.82	0.641	-0.228	-1.154	1.23	-1.106	-0.585	0.788	0.523	0.217
5324	2.937	-1.186	2.324	0.087	1.679	1.446	-0.548	-2.386	-1.22	-1.632	1.437	-1.008	3.963	-1.911	0.804	-2.993	0.057	2.472	0.448	1.743	-0.608	0.96	1.911	-0.094	2.995	-1.23	1.786	-1.058	2.732	-2.814	0.241	3.465	1.687	1.011	-0.059	1.679	1.248	-0.522	0.825	3.949	-0.096	4.324	0.796	0.688	0.845	0.706	2.077	2.374	2.466
89891	-0.575	0.033	-0.381	-0.074	-0.051	-0.731	1.608	0.052	1.492	-0.902	-0.44	-1.046	-0.821	-0.864	-0.778	1.408	0.419	-1.14	0.445	-0.239	-0.539	-0.832	-1.022	-0.405	-0.368	-0.627	-0.923	-0.351	-0.115	-0.294	-0.535	0.244	-0.677	0.008	0.461	0.08	0.22	0.245	-0.853	-0.06	0.289	1.679	0.426	-1.008	-1.377	-0.066	-0.107	-0.263	-0.696
646450	1.156	0.24	0.229	0.315	0.518	0.002	-0.027	0.037	-0.11	0.477	-0.459	1.27	0.304	0.471	-0.309	0.274	-0.159	-0.474	1.031	1.038	0.028	1.762	0.926	2.244	1.255	1.056	-0.12	0.546	0.865	0.738	-0.622	0.602	1.237	0.917	-0.046	0.483	0.3	-0.358	1.354	-0.65	0.919	-0.161	0.03	0.232	0.247	0.995	0.699	0.762	0.062
9682	0.002	0.447	0.472	0.024	-0.53	0.156	0.58	1.832	0.431	0.533	0.537	0.528	-0.844	0.876	0.763	-0.013	1.065	-0.372	1.566	0.602	-0.103	0.646	0.751	0.458	0.094	1.349	-0.268	0.12	0.463	0.506	1.429	0.24	0.534	0.371	1.209	0.54	-0.307	0.769	1.216	0.815	0.898	1.231	0.572	1.523	0.625	0.181	0.09	1.547	-0.399
6676	1.728	3.315	0.08	-0.153	0.118	0.218	-1.363	1.866	2.174	1.021	0.019	0.665	0.289	-0.535	1.848	0.526	2.849	0.55	2.038	-0.391	0.557	0.334	1.515	0.532	0.309	0.738	-0.117	0.683	-0.303	1.085	1.358	0.544	0.116	3.088	3.293	-0.522	0.09	0.451	3.209	-0.278	0.751	1.663	0.98	0.706	1.487	1.942	0.94	0.778	-0.348
10201	0.06	-0.284	0.908	0.431	1.206	0.173	-0.055	-0.126	1.097	0.499	0.173	0.449	0.332	0.329	1.371	-0.167	0.156	-0.55	0.943	0.418	0.275	0.807	0.828	-0.004	1.083	1.087	0.822	0.426	0.441	0.173	0.705	-0.147	1.14	-0.551	-0.694	0.377	0.776	0.106	-0.309	0.176	1.005	0.101	1.425	-0.681	0.608	-0.389	0.903	0.109	0.401
389383	-0.319	0.575	-0.135	0.214	0.676	0.329	0.098	-0.036	0.122	0.132	0.059	0.182	0.149	0.234	0.432	-0.241	0.025	-0.15	-0.029	-0.257	0.158	-0.106	0.002	0.078	0.174	0.533	0.33	-0.056	-0.168	-0.199	0.463	-0.109	0.148	-0.299	0.119	0.383	-0.162	0.214	0.065	0.195	-0.1	0.29	-0.005	-0.478	0.306	0.335	0.241	0.207	0.257
4635	-0.429	0.526	1.471	-0.279	0.526	0.024	-0.72	0.171	-0.305	-0.995	-0.413	-0.681	0.405	-1.539	0.321	-0.139	-0.125	0.359	-0.234	3.039	-0.956	0.367	-0.104	-0.081	0.937	-0.061	0.391	0.288	0.236	0.076	-2.472	-0.798	-0.511	0.678	-0.376	1.1	-0.118	-1.172	-1.016	-0.032	-0.408	-0.851	-0.133	-0.269	0.304	-0.108	-0.195	-0.034	0.02
5910	-2.16	-0.925	0.101	0.839	-0.586	-0.22	-1.505	-1.354	-0.679	-0.542	-0.828	-0.084	-1.825	-0.384	-0.002	0.755	-1.389	-0.37	-0.22	-0.617	0.263	-0.269	0.171	-0.486	-0.268	-0.64	-0.402	0.262	-0.205	0.922	-1.228	-0.2	-0.296	-0.35	-0.539	-1.71	0.278	-0.514	0.47	-1.177	-1.56	-2.909	-1.288	-0.894	0.376	-0.193	0.456	-1.161	-0.673
145645	-1.096	-1.761	-2.691	0.739	-1.511	-3.632	-0.32	-1.384	-1.728	-3.021	-2.72	2.675	0.221	-3.349	-3.083	-0.844	-1.877	-4.284	-1.953	-1.724	-1.692	-3.523	0.081	-2.355	-1.53	1.212	-1.398	-0.275	-0.555	2.677	-3.231	-1.536	-2.436	-1.852	-2.371	-0.023	-1.003	-2.374	-2.305	-2.398	-0.576	-2.264	-3.268	-2.337	-1.31	-0.232	-1.014	-1.112	-3.275
83715	-0.669	-0.853	0.211	-0.174	0.128	-0.631	1.37	-0.176	0.669	0.035	-1.241	-0.598	-0.548	-1.779	-0.375	-0.21	-0.085	-2.59	-0.996	-0.237	-1.44	-0.378	-0.236	0.171	0.498	1.063	-1.854	0.156	-0.548	0.893	-0.928	-0.285	-1.481	-0.316	-1.181	0.285	0.107	-0.768	-0.675	0.724	1.782	-3.77	-2.874	0.73	-1.615	0.299	-0.058	0.608	-1.099
84871	-0.401	-1.108	-0.207	0.164	-0.319	-0.559	-0.251	-1.017	-0.991	-0.429	-0.863	-0.621	-0.543	-0.709	-0.334	-0.66	-0.643	-0.9	-0.44	-0.975	-0.932	-1.446	-1.254	-0.268	-0.199	-0.509	-0.427	0.159	-0.651	-0.113	-1.032	-1.423	-0.872	-1.288	-0.287	-0.3	0.322	-0.688	-0.425	0.128	-0.189	0.1	-1.365	-1.439	-0.857	-0.7	-0.862	-0.718	-0.426
27085	1.805	3.098	3.018	0.823	1.105	2.665	1.345	0.67	0.805	0.251	1.429	1.315	0.961	0.702	1.236	3.734	1.678	2.65	4.138	0.764	1.964	2.69	1.613	2.137	1.064	0.548	0.969	0.654	1.296	2.575	0.505	2.187	1.934	1.446	1.933	1.832	0.362	3.184	2.358	3.396	2.082	1.39	1.797	0.877	1.185	0.974	0.7	1.884	2.281
440955	-0.114	0.079	-0.513	-0.036	0.049	-0.737	-0.374	-0.642	0.063	0.213	-0.339	-0.169	-0.107	-0.578	-0.206	-0.288	-0.314	-0.627	-0.37	-0.042	-0.228	-0.252	-0.025	-0.404	-0.02	0.228	-0.322	-0.062	-0.365	-0.134	-0.107	-0.341	-0.26	0.063	-0.27	-0.243	0.206	-0.29	0.023	0.169	-0.24	0.083	-0.239	-0.776	-0.228	-0.219	-0.414	-0.136	-0.043
6934	-0.327	-0.934	-0.339	-2.183	0.017	-0.876	-0.542	0.378	-0.485	-0.618	0.253	-0.01	0.77	0.774	-0.195	0.945	-1.286	-0.542	-1.216	0.866	-0.646	1.238	0.061	-0.485	0.64	0.261	-0.729	-0.332	0.901	0.367	-0.467	-0.599	0.777	-0.745	-0.313	0.422	-0.086	-0.418	-0.307	-0.844	0.013	-0.521	-0.034	-0.341	-0.389	-0.87	-1.449	0.315	-0.183
6886	-0.568	-2.452	-1.204	-1.055	-1.838	-0.576	-0.91	-1.989	0.088	-0.74	0.437	-1.014	0.221	1.477	-1.75	-0.489	-1.598	-0.147	-1.602	-0.453	-0.725	-0.251	-0.449	0.999	-2.405	0.505	0.91	-1.412	0.028	0.239	-0.752	0.572	-0.465	0.257	-2.277	-1.179	-1.778	-2.127	-2.259	-0.204	-3.5	-3.157	-0.245	1.159	0.26	-0.042	-0.859	-0.503	-2.389
221395	0.674	-1.252	-0.728	-0.458	-0.233	-0.096	-0.589	-0.809	-1.507	-1.474	-0.102	-0.546	0.139	0.006	-0.932	-0.173	-0.92	0.92	-0.118	0.948	-0.268	-0.146	-0.147	-0.03	-0.987	-0.915	0.113	-1.364	0.07	-0.411	-0.474	0.797	0.341	0.847	-2.233	-0.174	0.123	-1.434	-0.041	-0.087	-2.159	-1.978	-0.79	-0.052	0.437	0.156	-0.095	-0.397	0.168
26507	0.744	4.917	0.199	-0.354	-0.209	1.597	-0.035	-1.263	0.568	-0.397	-0.228	-0.533	2.466	0.002	-0.893	1.077	-1.006	0.149	-0.38	2.229	-0.638	2.003	2.126	-1.171	0.629	-0.713	-0.565	2.452	2.55	3.668	1.917	-0.17	1.799	-0.837	2.821	-0.091	-2.04	0.993	-1.023	-0.013	-0.992	-0.26	2.624	-0.385	4.085	3.169	2.509	2.964	2.264
2931	-0.924	0.889	0.073	0.039	0.463	0.506	0.282	-0.041	0.214	0.776	0.676	-0.304	0.349	0.472	-0.337	0.174	0.983	0.415	-0.293	0.404	0.062	0.469	-0.263	0.131	1.65	1.227	0.735	0.345	0.572	0.283	0.432	0.187	0.466	0.646	1.416	0.27	0.285	0.34	0.024	-0.341	0.285	1.288	0.742	0.877	0.742	-0.032	0.279	0.52	0.635
253039	-0.439	-0.272	-0.822	-1.263	0.813	0.402	1.023	0.685	1.631	0.477	0.322	0.595	1.357	0.61	0.478	1.053	-0.207	1.815	0.802	0.344	0.272	0.229	0.461	0.361	1.728	-0.045	0.2	0.034	0.603	-0.252	-0.456	1.189	0.688	1.277	1.673	1.899	0.773	1.102	1.534	1.759	2.034	2.344	0.883	-0.516	0.216	1.262	0.277	0.48	0.55
89978	0.475	-0.514	0.566	0.851	0.969	0.032	0.42	0.996	0.531	0.145	-0.417	1.101	-0.216	-0.457	1.022	0.806	0.623	-1.016	1.237	-0.542	0.491	1.293	1.108	-0.263	0.164	-0.165	0.191	0.191	-0.145	0.366	1.118	0.223	0.114	-0.841	0.072	-0.418	1.366	0.708	-0.162	0.794	0.451	-1.2	-0.603	-0.634	0.237	0.304	-0.045	0.077	1.001
23639	-0.06	-0.723	0.641	-2.034	-0.778	-0.709	-0.572	-0.594	-1.079	-0.981	0.152	0.068	-0.538	-0.608	-0.408	-1.477	-0.885	0.147	2.613	-1.347	-0.148	0.036	0.091	-1.627	-0.201	-0.799	-0.558	0.05	-0.244	-1.136	-0.797	0.667	-0.573	0.267	-1.8	-0.255	-0.364	-1.276	-0.769	-0.544	0.399	1.32	-1.094	1.05	-0.361	0.083	-0.064	-0.844	-0.469
246312	-0.011	0.837	0.231	0.009	-0.309	-0.203	0.584	-0.455	0.077	0.402	-0.186	0.129	-0.078	-0.823	0.58	-0.55	-0.196	-0.313	0.386	-0.112	-0.469	-0.863	0.002	-0.012	-0.026	-0.106	-0.256	-0.624	-0.365	0.154	-0.058	-0.132	-0.321	-0.495	0.194	-0.198	0.247	-0.395	0.203	-0.135	-0.119	0.751	0.357	-0.031	-0.727	-0.046	-0.095	-0.478	-0.632
23378	-0.403	0.006	0.019	-1.895	0.28	0.425	0.467	0.175	1.733	0.211	0.601	0.631	0.55	0.984	0.29	0.75	-0.521	-0.086	0.278	0.508	0.019	1.274	0.551	1.077	1.17	0.76	0.196	0.555	0.545	0.878	0.53	-1.162	0.362	-0.265	0.557	-0.059	0.034	0.421	0.436	0.537	-0.354	0.582	0.687	0.254	-0.147	-0.157	0.603	-0.017	-1.157
2642	-2.587	-3.566	-2.535	1.62	-2.048	-3.97	0.456	0.215	0.1	-0.124	-2.526	0.191	-0.927	0.48	1.078	-3.195	-3.361	-2.757	-2.834	-0.703	-3.584	-3.476	-3.234	-0.048	-1.626	-1.908	-4.627	-0.435	-3.97	-2.35	-1.782	-2.839	-2.126	-0.356	-1.773	-2.514	0.198	-3.367	-0.888	-0.495	-2.86	-3.183	-3.357	0.609	-4.144	-0.295	-2.931	-0.852	-1.359
255275	0.228	0.218	0.054	-0.614	0.072	-0.528	0.069	-1.021	0.146	0.588	-0.405	0.012	-0.119	-0.274	-0.393	-0.16	0.186	-0.539	0.207	-0.074	-0.182	-0.078	-0.05	-0.009	-0.027	0.779	-0.573	-0.093	0.38	0.39	0.024	-0.581	0.111	-0.131	0.078	-0.246	0.745	0.602	-0.045	0.141	0.422	0.474	0.173	-0.287	0.229	0.196	0.016	-0.071	0.193
7984	-0.121	1.05	-0.615	0.192	-0.072	0.153	0.62	1.063	0.446	1.375	0.462	0.024	-0.006	0.16	-0.249	0.675	2.023	0.447	0.232	-0.108	-0.827	0.566	-0.191	-0.858	-0.496	-0.164	-0.167	-0.596	0.525	-0.374	1.682	0.086	-0.918	-0.183	0.841	0.21	-0.98	0.713	-0.183	-0.19	0.067	2.749	0.836	-0.153	-0.567	-0.765	0.241	0.65	0.835
4707	0.022	-0.572	0.95	0.017	0.471	-0.873	0.187	-0.392	0.698	0.309	-0.212	0.495	-0.246	-0.307	0.182	-0.197	-0.507	-0.601	0.08	0.125	-0.562	0.122	-0.259	0.093	0.522	0.22	0	-0.39	0.113	0.378	0.506	-0.989	-0.311	-0.386	-0.019	-0.107	0.121	-0.132	-0.344	0.925	-0.563	-0.578	-0.592	0.183	-0.039	-0.151	-0.551	0.177	-0.031
8436	-0.247	-1.305	-1.613	0.086	-2.439	-1.147	-1.123	-1.923	-2.345	-2.205	-0.827	-1.627	-2.143	0.193	-1.998	-1.332	-2.48	-1.164	-2.868	-0.372	-2.2	-0.49	-0.246	-0.698	-2.739	-1.335	-1.91	-0.407	-0.472	-0.654	-2.743	-0.842	-0.162	-1.827	-3.717	-2.153	-1.089	-3.909	-1.138	2.44	-2.582	-4.947	-3.235	-1.545	-0.031	-1.099	-0.406	-1.874	-2.456
26502	-0.117	2.118	0.142	-0.726	0.861	-0.098	0.522	1.266	0.484	0.886	0.571	0.421	-0.148	0.544	0.892	0.786	1.796	-0.13	1.175	0.366	0.152	0.199	0.969	1.044	1.098	1.451	0.481	1.34	0.665	0.57	1.003	0.411	0.996	0.363	1.416	0.232	0.723	0.808	1.552	0.001	0.812	1.568	2.057	1.39	1.242	-0.547	0.636	2.09	0.758
80031	-2.35	-4.125	-2.215	-1.117	-1.827	-1.065	-2.534	-1.854	-3.169	-2.741	-0.686	-0.492	-0.692	-1.418	-3.661	-2.131	-1.406	-0.642	-1.854	-1.069	-0.618	-2.131	-0.933	-0.536	-0.39	-2.129	0.47	-3.124	-1.647	-2.776	-3.239	0.106	0.119	-1.335	-0.913	-2.389	-2.788	-2.601	-2.746	-1.717	-2.979	-1.217	-2.931	-0.618	-1.217	-1.436	-2.273	-1.678	-1.865
83854	-1.319	-3.586	-2.232	-0.024	-2.087	-1.947	-0.93	-2.578	-3.158	-2.599	-1.2	-1.823	-2.677	-1.803	-2.869	-2.158	-2.344	-2.872	-2.037	-3.767	-1.757	-4.304	-2.386	-2.484	-3.262	-2.223	-2.482	-1.378	-3.047	-1.85	-2.8	-1.394	-2.219	-1.405	-1.757	-2.763	-2.213	-3.134	-1.92	-2.256	-1.32	-3.189	-3.008	-0.537	-2.54	-1.612	-1.523	-2.033	-3.402
728325	-0.23	-0.264	0.005	-0.529	0.128	-0.404	0.342	-0.146	0.113	-0.125	-0.542	-0.629	-0.219	0.078	0.204	-0.264	-0.301	-0.105	-0.42	-0.064	-0.755	-0.45	-0.572	-0.449	-0.12	-0.387	-1.033	-0.466	-0.992	-0.51	-0.453	-0.614	-0.463	-0.503	-0.309	0.208	-0.533	-0.355	-0.397	-0.125	0.179	0.227	-0.149	-0.284	-0.816	-0.496	-0.721	-0.214	-0.432
115123	-0.543	-0.131	-0.18	-1.107	-0.213	2.291	-0.715	1.28	1.463	0.234	0.998	-1.148	0.616	0.284	-0.947	1.273	1.221	0.773	0.387	1.982	3.145	2.141	-0.353	-1.82	1.989	-1.185	0.675	-2.943	-0.056	-0.65	-0.134	-0.539	1.684	1.199	0.822	2.02	-1.487	1.925	0.359	-1.309	0.805	3.832	3.024	1.466	1.262	1.244	0.501	0.765	2.852
9374	0.264	1.289	-1.56	1.147	0.699	0.232	0.372	-0.083	1.59	0.596	-0.409	-1.323	0.929	0.864	1.269	-0.348	-0.485	0.216	0.498	0.646	-0.011	0.221	1.104	-0.65	0.251	0.703	0.701	0.662	0.138	-0.294	-0.409	0.654	1.409	0.21	0.646	0.786	0.942	0.675	-0.224	0.736	-0.836	1.652	1.351	0.14	-0.43	0.08	0.706	0.265	0.895
80774	-0.702	0.498	-0.752	-0.056	-0.305	1.269	-1.099	-0.589	0.193	-0.287	0.71	-1.174	-0.105	0.174	-0.245	-0.422	-0.816	0.677	-0.582	-0.151	0.594	-0.051	-0.762	-1.237	0.042	-0.079	0.955	-0.901	-0.753	-0.968	-1.223	0.817	0.667	1.669	0.212	-0.263	-0.281	-0.043	-0.258	-0.425	-1.466	1.093	0.798	0.152	-0.076	0.844	0.657	-0.973	0.391
9677	-0.331	1.229	1.283	-0.661	0.394	0.601	0.193	0.188	0.479	-0.154	0.612	0.329	0.939	1.465	0.278	-0.508	1.199	0.457	1.609	1.347	1.006	0.689	1.041	0.561	1.116	1.459	1.009	0.791	0.499	0.742	1.472	1.357	0.702	1.152	1.961	0.782	0.031	1.27	0.094	0.602	0.337	0.603	1.321	0.459	1.701	0.646	1.474	1.091	0.274
57604	-2.875	2.049	-0.899	-3.135	-2.302	-0.658	0.476	-2.115	0.045	-1.26	-0.042	-2.587	-1.284	-1.191	-2.531	-1.836	-2.57	-2.649	-3.28	-3.399	-2.387	-1.192	-1.386	-1.884	-2.082	-0.796	-2.532	-2.643	-2.081	-0.027	-0.598	-1.734	-1.1	-0.347	-1.13	-1.155	-1.02	-0.447	-3.681	-3.304	-2.364	0.121	-1.138	-0.8	-0.489	-0.28	-2.04	0.27	-1.562
92270	0.891	0.977	1.354	0.133	0.316	0.392	0.362	-0.525	0.633	0.358	-0.425	0.268	0.28	0.927	-0.118	-1.04	0.665	1.011	1.524	-1.266	0.709	-0.403	0.411	0.066	-1.551	0.447	-0.042	1.37	0.717	0.106	-0.081	1.426	0.556	-0.438	0.088	1.763	0.876	1.236	0.736	0.287	1.43	0.449	-0.273	1.189	0.259	0.53	0.261	0.578	0.592
55870	-0.032	1.124	0.816	-0.693	-0.007	0.459	1.403	0.591	0.909	1.1	1.26	1.133	1.084	0.661	-0.682	0.833	0.655	1.105	0.741	1.013	0.506	0.797	0.66	0.693	0.467	0.849	-0.392	-0.332	1.771	0.367	1.193	0.683	0.018	0.201	1.932	0.97	-0.203	1.75	-0.699	0.692	1.013	1.792	0.265	1.23	0.976	0.175	-0.495	1.681	1.084
57707	0.458	0.475	0.853	0.006	-0.257	0.104	-1.264	-0.881	0.94	0.09	0.18	-1.101	0.614	-0.67	-0.254	0.165	0.149	0.37	0.555	-1.346	-0.067	0.902	0.044	0.143	-0.641	-0.415	0.262	0.342	-0.274	0.13	-0.046	-0.164	-0.596	0.272	0.526	0.513	-0.307	0.891	0.677	-0.232	1.827	-0.553	-0.565	-0.287	0.866	-0.102	1.304	-0.174	1.006
5865	2.769	5.303	1.45	2.672	4.048	3.81	2.708	1.6	2.241	3.161	1.733	0.083	3.065	0.226	0.773	-0.309	4.259	5.206	-0.182	1.284	0.921	4.327	1.027	-0.676	4.241	0.477	3.612	-0.219	4.495	1.093	3.401	4.692	2.489	0.239	3.043	1.638	-0.149	4.966	1.287	2.155	3.782	3.126	5.155	5.891	4.46	1.574	2.554	3.409	4.167
6939	-0.438	0.175	-0.332	-0.101	0.04	-0.041	0.112	-0.335	0.358	0.438	0.482	0.25	0.363	0.702	0.486	-0.018	-0.092	0.116	-0.329	0.277	-0.134	0.278	0.032	0.414	-0.031	1.027	0.069	0.737	0.588	0.614	0.558	0.415	-0.155	-0.114	-0.442	0.009	0.276	0.286	-0.116	0.628	0.017	0.504	-0.286	0.317	0.032	-0.824	-0.105	0.208	-0.009
7360	0.025	-0.836	0.012	-0.232	0.057	-1.013	-0.794	-0.352	-1.013	0.195	-0.696	-0.55	-1.025	-0.578	-0.526	-0.04	-0.244	-2.013	-0.454	-0.73	-0.638	-0.179	-0.713	0.303	-1.688	-0.805	-1.589	-0.755	-0.668	-0.396	0.029	-0.871	-1.061	-1.128	0.379	-0.834	-0.278	-0.659	-0.135	-0.097	-0.203	-1.065	-1.588	-0.214	-0.819	0.498	-1.405	0.135	-0.92
84866	1.341	-2.147	-1.962	0.055	-0.741	-0.3	0.743	0.109	-0.127	1.166	-1.434	0.178	-0.095	-1.366	-2.239	-3.158	-0.651	-1.089	-0.772	-3.64	-1.211	-1.209	-0.095	0.022	-1.715	0.012	-1.083	-2.562	-1.685	-0.597	-1.209	-0.739	-1.275	-0.743	0.528	1.191	-2.32	-2.636	0.868	-0.526	0.023	-0.186	-1.065	1.56	-3.328	0.432	-1.534	-0.499	-2.308
50840	0.234	-0.51	-0.238	-0.493	0.273	-0.613	0.473	-0.191	0.022	-0.366	-0.963	-0.225	-0.027	-0.439	0.175	0.461	-0.396	-0.21	-0.625	-0.646	0.159	0.56	0.578	0.74	-0.335	-0.371	-0.097	0.274	0.264	-0.494	0.157	0.012	0.231	-0.461	-0.269	-0.242	0.312	-0.736	0.24	0.112	0.119	0.058	-0.251	0.544	-0.011	-0.479	-0.07	0.298	-0.821
284440	0.629	1.347	-0.434	0.157	0.561	-1.007	0.79	-0.479	1.378	1.323	-1.194	0.652	1.873	0.829	-0.399	0.497	-1.267	0.749	0.526	0.502	0.461	-0.476	1.174	1.097	-0.45	0.486	-0.137	0.489	-0.04	0.209	-0.831	0.573	0.687	0.527	-0.06	1.718	-0.894	0.023	0.391	0.073	0.787	0.686	-1.215	1.452	-1.526	0.144	-0.416	0.835	1.017
6310	0.024	-0.109	0.571	0.856	0.947	-0.1	1.023	-0.413	-0.526	0.126	0.119	0.456	0.902	-1.063	0.242	0.441	-0.688	0.61	-0.549	-0.511	0.237	-0.047	0.197	0.602	0.854	0.15	-0.36	0.783	-0.084	-0.464	-1.118	0.552	0.883	0.549	-0.463	-0.171	-0.233	-0.784	1.989	0.645	0.305	-0.474	0.366	-0.761	0.276	0.814	0.188	-0.006	-0.477
25789	0.041	0.073	-0.135	0.132	0.139	-0.258	-0.132	-0.778	-0.137	0.36	-0.611	-0.167	0.19	-0.32	0.4	-0.309	-0.383	-0.293	-0.268	0.112	-0.512	-0.136	-0.23	-0.098	-0.099	0.638	-0.787	0.491	0.174	0.392	-0.313	-0.406	-0.53	-0.292	-0.05	0.178	0.189	0.259	-0.612	0.051	-0.16	0.349	-0.054	-0.327	0.198	-0.497	-0.161	-0.277	0.14
391518	-0.053	0.057	0.268	0.329	0.22	-0.1	-0.363	-0.081	0.184	0.197	-0.07	-0.232	-0.073	0.032	0.356	0.159	0.229	-0.127	-0.106	0.151	-0.338	-0.156	-0.398	-0.15	0.242	1.051	-0.442	0.088	-0.531	0.1	0.325	-0.621	-0.539	-0.537	-0.325	0.266	0.187	0.322	-0.404	0.018	-0.325	0.037	0.38	-0.208	0.191	-0.583	-0.099	-0.271	0.031
9514	0.237	0.567	-0.014	0.689	-0.082	0.524	-0.457	0.786	1.696	-0.027	-0.011	-0.015	0.416	-0.405	-0.198	-0.714	1.855	-0.044	0.012	1.514	-0.353	-0.678	-0.935	-0.149	3.18	0.922	-1.368	0.581	-0.701	-0.199	-0.025	-0.359	0.392	-0.837	1.689	1.624	0.23	-0.027	-0.39	0.15	0.599	0.318	-0.046	0.333	-0.617	-0.968	-0.476	1.217	0.426
4646	-0.869	-0.295	-0.175	-0.685	0.423	0.397	-1.099	0.355	-1.164	-0.338	0.927	-0.851	0.238	-1.159	-0.088	-0.002	0.924	0.224	0.542	-1.31	-0.014	0.427	-0.336	-1.007	-0.281	-1.138	1.245	-0.085	0.104	-1.02	0.566	0.046	-0.363	-0.231	0.877	-0.1	0.057	0.574	-0.3	0.817	0.58	0.65	0.495	0.891	0.509	0.453	-0.821	-0.037	1.194
5256	-1.053	1.93	-0.364	-0.055	0.406	-0.053	-0.515	-0.216	0.515	0.26	-0.404	0.523	0.162	0.365	-1.206	-0.214	2.043	0.163	-0.017	-0.044	0.143	-0.809	-0.458	-0.265	0.578	0.509	-0.05	0.125	0.408	0.015	0.629	0.933	-0.174	-0.093	0.468	0.779	-0.519	0.736	0.385	-1.196	0.801	0.699	0.096	0.731	1.264	-0.627	-0.753	0.732	0.023
6829	-0.217	0.826	-0.054	-0.631	-0.084	0.726	0.255	0.107	0.087	0.231	0.234	-0.131	0.288	0.496	-0.272	0.543	0.639	0.44	-0.637	0.791	0.317	0.096	-0.24	0.007	2.058	0.649	0.779	0.268	1.149	0.459	0.215	-0.028	0.611	0.279	1.487	0.561	0.081	0.105	-0.372	-1.112	0.1	1.192	1.028	0.836	0.293	-0.414	-0.429	0.457	0.86
7461	0.292	2.036	0.157	-0.057	-0.61	1.623	-0.752	0.226	1.423	-1.17	1.003	-0.846	-0.139	-0.247	0.618	-0.999	0.626	0.953	1.943	-1.438	1.056	0.199	0.277	-0.754	-0.927	-1.298	0.28	-0.184	0.381	-0.079	-0.37	0.816	-0.001	0.879	0.539	-0.241	-1.166	0.906	1.966	-1.623	1.675	0.772	1.344	0.606	2.12	0.512	2.251	1.123	1.421
728622	-0.543	-0.564	-0.557	0.758	0.392	-0.06	-0.258	-0.316	-0.279	0.307	-0.401	-0.017	0.102	-0.361	-0.07	-0.174	-0.718	-0.21	-0.304	-0.106	-0.728	-0.093	-0.123	-0.063	0.251	0.198	-0.32	0.298	-0.378	0.393	0.172	-1.125	-0.703	-0.559	0.38	-0.243	-0.145	0.62	0.274	0.295	0.184	-0.205	-0.033	-0.974	-0.521	-0.247	0.073	-0.349	0.66
56978	-0.622	-1.353	-1.257	-2.302	-0.756	0.718	-1.286	-0.218	-1.435	-1.277	-0.287	-0.776	-0.224	-0.081	-1.327	-1.306	0.101	0.331	-0.654	-0.664	-0.101	0.809	-1.089	-2.047	-0.388	-0.971	1.044	-2.26	1.143	-1.138	-0.679	0.035	-0.562	0.882	-2.119	-1.742	0.665	-1.988	0.213	-1.772	-2.367	-1.326	-0.305	0.544	1.091	0.88	1.46	-1.997	-0.667
642273	-0.098	-2.747	-3.865	0.572	-3.581	-3.555	-1.022	0.116	-1.615	-0.099	-0.243	-7.133	-0.346	-1.431	-6.355	-1.564	-0.892	-3.201	0.354	-5.084	-0.554	-1.718	-2.466	-1.074	-1.771	-0.975	-0.089	-1.674	-6.084	-5.995	-0.099	1.188	-0.984	-5.916	0.172	-0.336	-3.052	-1.68	0.457	-1.539	-0.412	-1.822	-4.447	-0.291	-4.005	-0.523	-0.827	-0.224	-1.252
374387	0.378	-0.565	0.519	0.792	-0.703	0.118	-0.993	-0.128	-0.765	-0.337	-0.733	0.469	-1.365	-0.028	-0.966	-0.728	0.018	-1.633	0.048	-1.777	-0.703	1.215	0.13	-0.63	-1.688	0.19	-0.839	-1.053	-0.223	0.049	0.757	0.526	-0.377	-1.54	0.284	-0.778	0.163	0.231	-1.352	0.453	-0.835	-1.007	-0.331	-0.568	-0.476	0.423	0.542	0.649	0.643
526	0.026	0.461	0.017	-0.026	0.661	-0.164	-0.65	-0.571	-1.487	-1.514	0.173	0.407	-0.532	-0.963	0.633	-0.536	0.77	0.339	-0.821	-0.231	0.147	-0.729	-0.517	-0.864	0.268	-0.608	1.049	-0.812	-0.56	-0.607	0.916	-0.077	0.064	0.299	0.044	-0.933	0.408	-1.928	-0.892	-1.331	-0.933	-0.522	-0.375	0.105	-0.583	0.437	0.228	0.587	-0.345
51450	-0.312	-0.255	0.325	0.003	0.249	-0.212	-0.055	-0.816	0.461	-0.273	-0.311	-0.063	-0.149	0	-0.005	-0.042	0.124	-0.073	-0.135	-0.093	-0.527	-0.319	-0.015	-0.247	0.101	0.421	-0.266	0.452	-0.47	-0.029	0.429	-0.377	0.202	-0.654	1.013	0.397	0.404	0.473	-0.33	0.357	0.07	0.127	-0.019	-0.145	0.228	-0.649	-0.276	-0.308	0.052
56672	0.53	0.557	0.979	0.61	-0.323	1.084	0.062	0.629	1.475	0.585	1.437	0.446	0.008	0.507	0.133	0.302	0.663	-0.064	1.678	-0.119	0.193	0.926	0.539	0.306	-0.458	0.133	0.504	0.441	0.269	0.452	0.527	0.39	0.287	0.203	0.808	-0.008	0.746	0.919	0.589	1.32	0.508	0.651	0.906	0.455	0.367	0.375	0.877	0.919	1.308
7477	-0.084	-0.077	-0.293	-0.057	-0.05	-0.262	-0.199	-0.195	-0.26	-0.069	-0.353	-0.151	0.597	-0.234	0.363	-0.129	0.13	-0.085	-0.308	0.124	-0.359	-0.213	0.098	-0.228	-0.318	0.191	-0.394	-0.216	-0.372	-0.046	0.199	-0.423	-0.203	-0.595	-0.148	-0.125	-0.595	-0.091	-0.093	-0.343	-0.396	0.426	-0.073	-0.194	-0.028	-0.176	-0.182	0.298	0.402
201501	-0.397	-0.976	-0.024	-0.089	-1.192	0.167	-0.195	0.493	0.143	2.133	-0.106	0.993	-0.99	0.454	-0.593	-0.243	1.529	-0.615	-0.585	-0.476	-0.633	-0.944	-0.137	1.118	-1.451	0.109	-1.157	0.622	-0.348	1.143	-0.217	-1.14	-0.183	0.911	-1.536	-1.182	1.115	-1.132	-1.027	-1.027	-0.666	-1.012	-1.094	0.85	-0.717	-0.034	0.467	0.152	-0.101
643563	0.756	-0.402	-0.146	0.206	0.18	0.058	-0.899	-1.3	0.25	0.739	-0.061	0.172	0.04	0.192	0.159	-0.314	-0.47	-0.329	-0.55	-0.109	-0.22	-0.158	0.201	0.199	-0.168	0.23	-0.314	0.128	-0.516	0.3	0.337	-0.074	-0.006	-0.298	-0.13	-0.447	-0.139	0.178	-0.292	-0.098	-0.047	0.564	0.068	0.115	0.492	-0.349	-0.32	0.032	-0.298
55024	-0.1	-1.291	-0.536	-0.148	-2.457	3.264	-1.131	0.604	-1.135	0.132	2.902	-0.462	-0.152	-1.153	-1.065	-1.594	1.008	0.869	-1.529	-1.126	2.377	-0.796	-1.646	-0.542	-1.417	-0.65	-0.05	-0.565	-0.636	-2.217	-1.708	1.804	0.348	2.925	-0.803	-1.674	-1.015	-1.3	-0.717	-1.815	-0.302	2.33	-1.054	-0.421	-0.051	2.586	1.106	-2.553	-0.252
2558	-0.154	0.145	-0.216	-0.067	-0.028	-0.484	-0.212	-0.729	0.073	-0.151	-0.524	0.266	-0.34	-0.298	0.492	-0.134	-0.154	-0.356	0.771	-0.374	-0.791	-0.326	-0.33	-0.178	-0.155	-0.808	-0.668	0.115	-0.041	-0.059	-0.342	-0.664	-0.313	-0.682	-0.289	0.408	0.054	-0.036	0.377	0.157	-0.285	0.163	-0.405	-0.56	-0.843	0.372	-0.866	-0.184	-0.296
79411	0.94	-1.343	-0.914	0.477	-0.652	0.689	0.1	1.336	0.299	1.175	-0.62	-0.638	0.821	-0.591	-1.231	-0.812	-0.304	0.18	0.936	-1.249	-0.169	-0.569	-0.437	-0.925	-0.336	-2.111	0.398	-0.92	-0.469	0.891	1.627	-0.551	0.201	0.133	1.634	-1.763	-0.27	1.019	-0.463	0.626	-3.344	-0.574	0.047	-1.14	-0.701	-0.21	-0.107	1.537	1.049
30818	-0.024	0.081	0.266	0.393	0.264	-0.432	-0.354	1.849	0.363	0.151	-0.163	-0.082	0.046	0.1	-0.162	0.058	-0.036	-0.084	0.304	0.011	-0.333	-0.475	-0.265	0.167	0.192	0.495	-0.262	0.829	0.128	0.306	-0.349	-0.329	-0.259	-0.488	0.013	-0.028	0.415	0.568	0.007	0.109	0.069	0.701	0.161	-0.116	0.106	0.007	-0.365	0.33	-0.196
201283	0.823	0.767	0.958	0.666	0.433	0.231	0.003	0.99	0.603	-0.455	0.002	1.034	0.065	-0.03	0.315	-0.049	0.14	0.282	1.718	-0.911	0.28	0.518	0.027	0.103	-0.825	0.06	0.054	0.135	-0.571	-0.02	0.31	0.604	-0.038	0.615	0.83	0.126	-0.103	0.892	1.257	1.426	-0.014	0.322	-0.178	-0.076	0.065	0.387	0.805	-0.265	0.471
116039	0.216	2.539	1.09	0.208	1.302	0.013	0.856	1.793	0.997	0.298	0.111	-0.337	-0.41	1.721	2.127	0.214	2.287	-0.475	2.995	0.159	-0.81	0.217	1.25	0.09	3.38	-0.39	1.377	3.62	0.131	0.017	-0.091	-0.185	0.749	-0.86	-0.68	-0.182	0.43	0.618	2.379	1.555	3.41	3.99	3.535	-0.567	0.74	1.42	2.317	0.361	-0.426
11049	-1.271	-1.389	0.645	-2.241	1.625	0.078	-0.329	0.623	-0.035	-1.204	0.361	-0.645	0.618	1.361	1.15	-0.607	-0.089	-0.879	0.237	1.335	0.664	0.344	0.783	0.984	0.525	0.238	0.008	0.937	0.086	1.099	1.368	-2.504	-0.34	0.276	-0.262	-0.482	0.07	0.944	0.309	0.731	0.615	0.404	-1.706	-1.121	0.075	-0.804	0.101	-0.677	-2.238
199857	0.607	-0.395	0.861	0.689	0.593	-0.877	0.584	0.321	0.7	-0.892	-0.496	0.649	-0.319	0.381	0.198	0.678	-0.401	-0.372	0.896	0.775	-0.182	-0.211	-0.36	-0.203	0.48	0.305	0.258	-0.001	-0.616	0.15	0.821	-0.459	0.178	-0.259	0.381	0.309	0.032	-0.338	0.458	1.525	-0.632	-1.107	-0.219	0.207	-0.345	-0.068	0.261	0.771	-0.063
5267	-0.418	-1.61	-0.829	0.075	-0.194	-1.863	0.051	-0.82	-0.169	0.134	-1.268	-0.119	-0.383	0.046	-1.955	-2.408	-1.142	-1.353	-5.082	-0.764	-3.382	-2.117	-0.838	0.408	-1.047	-0.56	-2.433	-1.41	-0.066	-0.021	-0.519	-4.226	-0.834	-1.083	-2.834	0.871	-2.193	-0.831	-1.587	-0.583	0.337	-1.943	-3.268	-0.076	-1.857	-0.72	-3.594	-0.712	-0.129
3959	-1.049	1.685	-0.347	-0.831	-1.279	1.363	-1.645	-2.07	-1.315	-0.448	0.214	-2.421	-0.128	-2.064	-1.208	-2.849	-1.869	-1.382	0.748	-0.593	-0.001	-2.398	0.073	-0.692	-2.964	-2.013	-0.697	0.267	-1.14	-1.207	0.096	-0.508	0.717	0.65	1.062	0.506	-0.388	1.074	-1.222	-0.428	-3.343	0.2	-0.373	-0.395	-1.014	-0.342	-0.044	0.439	0.681
10	-1.492	-3.734	-2.505	0.759	-4.109	-4.34	-1.972	-3.167	-4.977	-2.586	-2.47	-0.393	-6.975	-3.889	-7.255	-3.776	-4.498	-7.202	-4.295	-6.598	-1.883	-7.428	-3.24	-1.039	-6.377	-0.186	-8.606	-1.989	-4.443	-0.789	-7.668	-1.594	-5.389	-4.929	-3.831	-8.299	-1.616	-3.766	-6.867	-6.274	-3.6	-7.113	-8.286	-2.673	-4.671	-2.161	-3.291	-2.692	-7.25
10870	0.459	-0.758	-1.009	-0.648	-1.38	0.927	-1.045	-0.404	-1.816	-0.609	0.459	-1.929	-1.141	-0.651	-0.648	-0.9	-1.14	0.822	-1.3	-0.252	0.55	-0.768	-1.014	-1.099	-0.729	-0.791	1.099	-0.851	-0.978	-0.445	-2.065	-0.602	0.32	1.962	-1.726	-1.978	-0.26	-1.373	-0.476	-1.423	-2.467	-1.158	-0.087	0.005	0.106	0.732	1.804	-1.686	-1.212
5462	1.375	2.251	2.052	1.166	-1.113	0.571	1.182	0.75	1.686	1.115	-0.573	1.745	-0.666	2.145	-0.816	1.154	2.672	-1.046	4.354	-0.806	-0.537	1.84	1.245	0.067	-0.352	1.44	-0.407	1.135	2.478	0.785	2.24	0.51	0.67	0.647	1.897	-1.134	-0.446	1.019	0.573	1.795	0.054	2.069	1.617	0.823	0.683	1.165	2.619	0.967	0.635
6455	-0.041	1.03	-0.406	0.502	0.652	0.003	0.012	-0.519	0.103	0.52	-0.213	-0.318	0.814	0.557	-0.153	0.601	0.468	0.824	-0.422	0.405	-0.072	-0.494	-0.244	-0.413	0.834	0.562	0.259	-0.358	0.067	0.67	-0.431	0.26	0.929	0.499	-0.057	0.234	0.081	-0.718	-0.884	-0.434	0.321	1.36	0.556	1.001	0.346	-0.222	-0.612	0.916	0.804
79969	-0.092	1.296	0.742	0.547	0.438	-0.045	0.863	0.396	1.397	0.17	0.267	1.214	1.288	0.29	-0.297	-0.176	0.603	1.049	-1.28	0.428	0.117	-0.053	-0.122	0.564	0.673	1.459	-0.815	0.032	0.4	-0.077	0.41	0.512	0.891	0.75	0.6	0.977	0.389	0.155	0.722	0.889	0.459	2.237	-0.598	0.723	-0.573	0.064	-1.147	0.837	0.526
120534	0.265	-1.258	0.429	-1.677	1.378	-0.172	0.53	0.042	0.263	0.098	0.384	0.279	0.663	1.243	0.119	1.063	-1.09	0.032	-0.236	-0.094	0.956	1.459	0.781	0.777	-0.162	0.639	0.557	0.553	-0.064	0.424	0.43	-0.187	0.808	0.366	0.35	-0.323	-0.357	0.702	1.143	0.375	-0.224	-0.09	0.062	0.186	0.242	-0.07	0.273	0.18	-0.273
23169	-1.467	-1.828	-0.513	-0.65	-1.203	-1.307	0.133	-0.909	0.096	0.086	-1.088	-1.442	-0.973	-0.28	-0.014	0.033	-0.758	-1.799	-2.607	0.047	-1.972	-1.221	-0.43	0.276	-1.459	-0.344	-1.774	0.265	-1.377	0.358	-0.829	-0.634	-1.6	-2.134	-0.636	-0.921	-0.278	-1.002	-0.885	-0.507	1.672	-0.264	-1.647	-1.109	-1.62	-0.954	-1.063	-0.511	-1.806
55062	-1.352	1.031	-0.295	0.072	-0.394	0.001	-0.564	0.863	0.761	0.196	0.615	-0.019	-0.313	1.084	1.298	0.257	0.19	-0.318	0.332	0.411	-0.938	-0.277	0.153	-0.183	0.114	-0.624	-0.637	0.778	-0.534	0.297	0.366	-0.001	0.113	0.225	0.885	-1.196	0.467	-0.278	1.001	1.615	0.18	-0.077	0.374	1.033	0.954	0.034	0.482	0.94	0.007
1622	-0.199	-1.856	-1.079	-0.412	0.222	-0.425	0.647	-0.117	-0.208	-0.441	-1.408	-1.242	-1.141	-1.623	-1.431	-1.588	-1.099	-2.31	-0.528	-0.327	-1.232	-1.812	-1.179	-0.007	-1.251	-0.725	-1.924	-0.075	-1.116	0.168	-0.791	-0.482	-1.614	-1.619	-1.116	-0.692	-0.313	-1.288	-1.019	-0.673	0.565	-1.506	-2.494	-1.596	-0.833	0.206	-1.939	-0.539	-2.715
25895	0.143	0.565	-0.175	-0.434	0.538	-0.34	0.425	0.442	-0.291	0.292	0.058	-0.132	-0.198	-0.059	0.761	0.729	-0.456	0.01	0.658	-0.064	0.469	-0.304	0.378	0.94	-0.172	-0.193	-0.109	0.254	-0.776	0.195	0.264	-0.339	0.743	0.307	0.068	-0.179	-0.138	-0.926	2.442	0.693	0.645	-0.067	2.839	0.393	-0.102	-0.121	1.179	0.331	-1.445
283868	-0.265	0.26	-0.707	-0.198	0.345	-0.03	-0.161	-0.99	-0.265	-0.093	0.18	-0.188	-0.145	-0.401	0.3	0.143	0.125	-0.121	-0.334	0.06	-0.464	-0.6	-0.377	0.267	-0.125	0.444	-0.566	-0.009	0.207	-0.339	-0.195	-0.92	-0.258	-0.501	-0.721	-0.314	0.183	1.032	-0.2	0.62	-0.278	-0.238	-0.224	-0.004	0.036	-0.505	-0.354	-0.394	0.083
1889	-0.446	-1.128	-1.122	-0.972	-0.09	-0.173	1.065	-0.3	0.953	-0.292	-0.537	-0.932	-0.124	-0.055	0.523	-0.735	0.132	-0.837	-0.465	-0.537	-0.435	-0.506	0.018	-0.467	0.359	0.469	-0.622	-1.098	0.006	-0.395	0.114	0.22	0.706	-0.262	-0.888	-0.066	-0.482	-0.743	-0.868	-0.809	0.557	0.519	-0.815	-0.024	0.263	-0.049	-0.516	-0.175	-0.512
64324	0.15	1.245	-0.005	0.659	0.39	0.009	-0.361	0.42	0.766	0.616	-0.049	0.33	0.219	0.017	0.18	-0.145	0.167	1.781	0.126	-0.259	-0.343	-0.488	-0.278	0.514	0.506	0.969	-0.047	0.263	-0.198	0.113	0.049	0.525	0.946	0.272	1.038	1.102	0.2	0.577	0.618	0.276	1.263	2.767	1.506	0.782	0.54	-0.334	-0.044	0.46	0.428
57731	-0.119	-0.406	0.174	0.614	-0.124	-0.196	0.44	-0.447	0.923	-0.313	-0.863	0.29	-0.148	0.291	-0.31	0.789	0.042	-0.49	0.081	0.706	-0.294	-0.381	-0.597	0.097	-0.042	1.24	-0.03	0.409	-0.292	0.146	0.117	-0.187	-0.334	0.096	1.228	-0.049	-0.243	0.199	-0.608	-0.092	0.617	-0.413	-0.162	0.085	-0.514	-0.845	-0.443	0.003	0.345
145788	0.041	0.269	0.096	1.247	-1.236	0.361	0.385	-0.336	-0.405	0.02	0.172	1.129	-1.184	0.362	-1.057	1.227	0.332	-0.417	2.315	-0.311	0.562	1.062	0.085	0.342	-1.952	-0.228	-0.074	0.808	-0.972	0.243	0.974	0.777	-0.316	1.101	1.918	-0.051	-0.831	-0.176	1.884	1.794	0.797	0.382	-0.767	1.14	1.207	0.527	1.298	0.677	0.345
132014	0.186	-0.47	0.015	0.184	0.316	-0.389	0.319	-0.33	0.742	0.412	-0.532	0.068	0.448	-0.194	0.258	0.303	0.421	0.005	0.317	0.821	-0.49	-0.279	0.151	0.636	0.677	0.533	-0.18	0.004	-0.227	-0.031	-0.1	-0.867	-0.05	-0.725	0.419	0.521	0.332	0.347	-0.084	0.229	0.677	0.579	-0.063	0.316	-0.541	-0.271	0.573	0.328	-0.088
7076	0.231	-0.699	-0.599	-1.447	-0.065	1.611	-2.62	0.407	-2.424	-0.524	1.318	-3.575	-0.307	-1.528	-1.057	-2.511	0.665	0.834	-0.436	-2.612	0.844	-0.162	0.151	-1.849	-1.757	-1.761	-0.065	-2.589	-0.259	-2.153	-0.334	0.377	0.89	0.974	-3.256	0.529	-1.413	-0.729	-1.48	-4.105	-3.071	-2.588	0.035	0.704	0.347	0.23	-0.874	-1.045	0.38
132299	0.181	-0.151	-0.288	0.001	-0.008	0.103	-0.425	0.121	-0.627	-0.073	-0.507	0.107	-1.661	-0.774	-0.542	-2.559	-0.789	-3.304	-0.015	-5.122	-0.262	-0.497	-0.608	-0.039	-1.928	-0.064	-2.125	0.562	-2.91	0.007	0.419	0.071	-1.127	-1.53	-1.283	-4.512	-0.153	-0.456	-1.42	-0.387	-0.497	-0.563	0.086	-0.02	-1.203	0.388	-0.329	-0.48	-0.312
64098	-0.328	-1.038	-1.36	-0.734	-1.901	1.111	-1.938	-0.861	-2.686	-1.667	0.885	-2.662	-0.619	-1.035	-1.03	-1.847	-1.191	0.458	-1.099	-0.681	1.002	-1.417	-1.315	-1.384	-0.628	-1.572	1.045	-1.857	-1.224	-1.106	-2.266	-0.132	-0.034	1.952	-2.099	-1.805	-0.805	-2.074	-1.041	-2.68	-3.183	-0.907	0.114	-0.753	-0.211	0.829	1.565	-2.462	-1.229
8336	-0.36	0.875	0.86	0.901	1.735	0.028	1.663	0.564	1.605	0.969	0.611	3.191	1.056	0.193	1.189	2.351	1.712	1.667	1.618	1.164	0.191	2.978	2.142	1.707	2.805	1.767	0.41	0.589	3.888	1.857	-0.55	0.789	0.957	2.307	1.866	1.634	1.634	0.544	0.651	1.084	2.161	2.01	1.418	0.05	0.452	1.277	-0.109	1.434	0.844
346171	-0.518	-0.195	-0.4	0.32	-0.023	-0.194	-0.45	-0.105	-0.416	-0.23	-0.183	-0.127	-0.539	-0.037	-0.035	-0.348	2.411	-0.281	-0.226	-0.007	0.386	-0.307	-0.235	-0.345	0.938	0.253	0.259	-1.442	-0.652	-0.076	0.28	-0.46	0.537	-0.199	-0.235	-0.618	0.214	0.01	0.124	-0.2	-0.484	3.315	-0.49	-0.441	-0.446	-0.238	0.517	-0.865	-0.136
1608	-0.291	1.322	-0.11	-0.255	0.855	0.685	-0.988	-0.772	-2.52	-1.19	0.486	-1.646	-0.453	0.195	-0.353	-1.33	-1.426	-1.247	0.265	-0.585	0.553	-1.067	0.202	-1.422	-0.825	-1.215	0.223	0.286	-0.654	-0.795	-1.217	0.874	0.481	-0.468	-0.451	-1.191	-0.159	-0.064	-0.792	-0.713	-2.133	-0.121	0.371	-1.902	-1.583	-1.238	1.343	0.205	-1.08
79685	0.477	0.388	0.162	0.753	0.18	0.37	0.628	0.11	1.096	0.995	-0.406	-0.009	-0.098	1.483	1.657	0.878	0.707	-0.486	0.642	0.008	0.16	0.439	1.309	-0.184	-0.022	0.764	-0.51	0.458	0.068	0.888	0.109	0.475	0.199	0.318	0.632	-0.414	1.101	0.92	0.898	1.132	0.984	0.867	-0.308	0.57	0.985	1.097	0.467	-0.647	1.125
11320	0.196	1.651	-0.483	1.358	1.256	0.96	-1.636	0.543	0.328	-0.702	0.616	-1.6	0.438	0.863	1.323	-0.887	0.23	-0.021	1.357	0.1	1.291	0.041	-0.242	-0.491	1.495	-0.369	1.492	-0.604	-0.562	-0.569	1.331	0.756	1.239	0.953	0.712	-0.716	0.278	0.306	0.863	-0.203	-0.215	1.472	0.23	0.883	-0.126	1.287	1.235	0.184	0.473
80318	-0.427	-0.298	0.227	0.062	0.506	-0.724	1.131	-0.346	0.627	0.112	0.201	1.341	0.091	-0.313	0.386	0.868	0.443	0.668	1.187	-0.611	-0.135	0.502	-0.117	0.499	-0.153	0.367	-0.241	-0.169	0.7	-0.32	0.086	1.869	-0.628	-0.334	-0.599	0.005	0.635	0.73	0.93	1.232	0.351	0.153	-0.905	0.785	0.574	1.154	-0.57	-0.355	-0.197
57132	0.215	-0.764	-0.022	-0.193	0.336	0.096	0.089	-0.357	-0.063	-0.418	0.188	-0.121	-0.417	-0.712	-0.319	-0.32	-0.561	-0.08	0.458	-0.404	-0.222	-0.123	0.228	-0.175	0.116	-0.206	0.188	0.71	-0.189	-0.106	-0.9	0.216	-0.693	-0.659	-0.324	-0.335	-0.233	-0.628	-0.349	-0.262	0.12	-0.374	0.042	-0.636	0.811	0.286	0.584	-0.835	0.083
56243	-0.368	0.368	-0.489	0.423	0.453	-0.4	-0.746	-0.411	-0.486	-0.374	0.334	0.792	0.562	-0.495	-0.491	0.109	-0.159	0.959	-0.298	-0.109	0.111	0.433	-0.139	-0.749	0.246	-0.309	-0.423	-0.013	0.006	-0.423	0.051	0.563	-0.248	-0.57	-0.274	-0.313	-0.638	-0.109	-0.685	-0.681	0.572	0.461	0.841	0.063	-0.767	-0.071	-0.704	-0.259	-0.08
1326	0.745	0.571	1.155	0.356	-1.127	0.752	-1.498	0.195	-2.58	-1.062	1.722	1.113	0.124	-1.101	0.855	0.295	1.162	-0.866	-0.717	0.07	0.19	-0.1	-0.178	-2.178	-0.892	0.195	0.579	0.982	1.031	0.304	0.121	-1.138	-0.423	0.993	0.027	-1.003	0.02	-0.922	-1.563	-1.564	-1.085	0.4	0.51	0.129	1.063	0.659	-0.231	0.758	0.263
3908	1.212	-3.622	-1.742	-1.237	-2.328	1.04	-3.855	-1.595	-3.087	-1.104	0.716	-1.559	0.538	-0.129	-4.011	-3.357	-1.768	0.936	-1.666	-4.139	-1.474	-1.135	0.321	-2.717	-3.973	-4.62	-3.782	-5.246	-1.565	-2.73	-1.875	0.735	-0.294	-0.279	-4.082	-0.871	-4.812	-3.566	-3.148	-3.495	-5.28	-4.132	-3.541	-0.375	0.501	-0.633	-4.536	-2.3	0.451
2568	-2.191	-2.609	-2.479	-2.729	-1.169	-0.124	-3.719	-1.282	-2.9	-2.183	1.714	-2.073	-2.222	-3.739	-2.749	-3.689	-0.288	1.536	-2.634	-3.34	-0.506	-2.003	-0.575	-3.809	-4.872	-4.085	-1.421	-4.769	-2.423	-4.69	1.339	-3.286	-1.817	-2.403	-3.814	-0.86	-3.015	-3.148	-2.414	-5.241	-5.262	-2.816	-2.097	-0.672	-1.896	-1.342	-4.605	-3.799	-2.499
574460	-0.37	0.041	-0.14	0.692	0.121	-0.533	0.419	-0.956	0.434	0.343	-0.025	-0.035	0.253	-0.05	0.342	0.501	0.057	-0.446	-0.049	-0.074	-0.161	-0.011	-0.253	0.196	-0.045	0.103	0.12	0.252	0.238	-0.026	-0.216	-0.267	0.218	-0.343	0.465	0.421	0.562	-0.342	-0.307	0.502	0.374	0.763	0.181	-0.721	0.15	-0.196	-0.762	-0.122	-0.035
83707	0.262	-0.678	-0.326	0.188	0.482	-0.174	0.707	-0.27	0.11	0.431	-1.046	0.09	-0.159	0.332	0.178	0.723	0.354	-0.948	0.274	-1.583	-0.82	0.321	0.064	0.003	0.066	0.112	-0.52	-0.235	-1.511	0.198	0.472	0.18	0.248	-0.45	0.46	-0.065	0.626	-0.325	-0.493	0.339	0.188	-0.425	-0.997	-0.216	-0.592	-0.154	-0.166	-0.163	0.049
752	-0.231	-0.277	-0.791	-0.474	-1.275	0.983	-0.619	-0.472	-0.728	-0.021	0.782	-0.641	-0.142	-1.099	-0.816	-0.444	-0.211	-0.031	-0.114	-0.079	0.581	-0.548	-0.542	-0.623	-0.587	-0.491	1.106	-0.827	-0.884	-0.68	-0.941	0.103	0.109	1.442	-0.742	-0.98	-0.332	-0.546	-0.106	-1.012	-0.017	-0.123	0.11	-0.146	-0.161	0.449	0.254	-0.66	-0.283
27000	-0.07	1.465	0.083	-0.336	1.011	0.628	-0.057	-0.384	-0.284	0.6	-0.188	0.601	0.937	0.136	0.544	0.517	0.482	0.944	-0.418	0.735	0.259	0.058	0.534	-0.179	1.058	0.115	1.023	0.087	0.653	0.115	-0.329	0.235	0.825	0.411	-0.382	0.647	0.695	0.2	0.294	-0.646	-0.579	1.538	0.49	0.571	0.787	-0.066	0.082	0.948	0.372
80333	-0.162	-0.589	-0.629	-0.139	0.52	0.047	-0.368	-0.657	-0.002	0.094	-0.384	-0.564	-0.814	-0.208	0.673	-0.203	0.079	-0.173	0.039	-0.421	-0.219	-0.398	-0.214	0.062	0.065	-0.918	-0.603	0.049	-0.714	0.546	-0.146	-0.516	-0.249	-0.554	-0.449	-0.093	-0.107	0.198	0.062	0.521	-0.048	-0.101	-0.153	-0.049	0.082	-0.872	0.264	-0.457	-0.739
220077	0.337	0.046	0.314	0.31	0.176	0.047	0.079	-0.369	-0.129	-0.035	-0.309	0.177	0.191	-0.28	0.268	-0.092	-0.103	-0.084	-0.14	0.293	-0.591	0.132	0.012	0.142	0.083	-0.095	-0.059	0.019	-0.377	0.047	0.205	-0.559	0.045	-0.701	-0.167	0.033	0.177	0.303	-0.017	0.402	-0.126	0.006	0.214	-0.369	-0.208	-0.227	-0.352	-0.526	0.002
9204	0.015	-0.259	0.036	-0.035	-0.66	-0.382	0.334	0.077	0.797	-0.197	-0.183	1.178	0.089	-0.067	-0.311	-0.208	-0.465	-0.468	0.491	-0.068	0.235	0.772	0.024	0.585	-1.054	0.468	0.285	-0.325	0.11	-0.158	0.551	0.385	-0.002	0.221	0.81	-0.543	-0.124	-0.178	0.906	0.377	0.685	-0.408	-0.165	0.058	0.305	0.425	0.035	-0.009	-0.59
284356	-0.13	0.313	0.34	-0.56	0.175	-0.239	0.056	-0.136	-0.004	0.077	-0.039	0.179	-0.186	0.436	0.494	0.049	0.51	-0.021	0.004	0.572	-0.38	-0.345	-0.47	-0.038	0.216	-0.059	-0.043	-0.208	-0.285	0.021	0.14	-0.357	0.145	-0.673	-0.13	0.262	0.632	0.426	-0.019	-0.128	-0.408	0.481	0.449	-0.785	-0.397	-0.779	-0.229	-0.209	0.387
23217	-0.122	-0.381	-0.258	0.389	-0.181	-0.533	0.342	-0.258	0.472	-0.155	-0.773	0.381	-0.355	0.129	-0.126	-0.268	-0.153	-0.607	-0.337	-0.179	-0.706	-0.217	-0.533	-0.272	-0.6	0.051	-0.712	-0.137	-0.902	0.074	-0.322	-0.094	-0.877	0.083	0.113	-0.395	-0.028	0.134	-0.542	-0.606	-0.218	-0.5	-0.179	-0.418	-0.176	-0.156	-0.016	-0.315	-0.93
6901	0.362	1.032	0.582	0.233	-0.1	0.29	1.274	0.332	0.747	1.039	0.223	0.539	-0.076	0.148	0.188	0.566	1.219	0.28	0.86	-0.538	0.539	0.382	0.538	0.188	0.002	1.96	-0.069	-0.23	1.574	0.679	0.343	1.164	-0.189	0.684	0.205	0.401	0.225	0.6	0.161	0.233	0.221	1.073	-0.148	0.777	1.468	-0.019	0.57	0.383	0.531
4753	2.067	-1.682	-0.257	-0.939	-2.76	2.823	-0.53	2.931	-2.302	-1.083	1.466	-1.939	0.482	-0.777	0.636	-2.272	-1.342	1.018	0.623	-1.723	1.876	-1.823	-0.937	-2.006	-0.781	-0.933	-0.128	-1.049	-0.88	-3.29	-2.83	0.073	0.357	2.708	-1.009	-2.263	-0.376	-2.242	0.301	-3.281	2.956	0.215	0.977	1.042	0.184	1.267	0.659	-3.376	-0.641
64326	-0.119	0.688	1.366	0.504	0.572	0.712	0.476	0.913	0.898	0.73	0.902	0.568	0.821	0.175	-0.287	0.817	1.136	0.819	0.642	0.912	0.229	0.604	0.493	-0.073	1.241	0.023	0.187	-0.142	1.176	0.428	1.16	0.724	0.345	0.411	1.129	0.865	0.372	1.55	0.392	0.031	0.757	0.649	0.192	0.647	0.623	0.18	-0.219	1.202	1.954
9972	0.215	-0.7	0.765	0.093	0.962	-0.043	0.619	0.426	-0.165	0.033	0.169	0.333	0.299	0.164	0.931	0.602	-0.309	-0.303	-0.185	0.522	-0.014	0.403	0.681	-0.048	0.787	0.97	0.188	0.069	0.76	0.453	-0.054	-0.432	0.55	0.049	-0.099	0.565	0.455	-0.247	0.087	0.012	0.216	-0.217	0.663	-1.027	-0.51	-0.282	0.401	0.271	-1.394
129293	0.128	2.031	-0.794	1.984	-1.051	1.163	-0.995	1.122	1.362	-0.705	0.515	-0.255	-0.899	1.708	-1.306	2.894	-0.323	0.176	-0.92	2.947	1.559	0.823	-0.184	-0.371	0.684	1.042	-0.762	-2.194	-0.122	-1.275	0.248	0.763	1.029	1.057	0.796	-0.374	-1.35	-0.266	0.368	0.131	-1.588	0.987	1.141	-0.306	-0.276	1.718	1.827	0.031	2.977
11316	-0.107	0.309	0.465	-0.034	0.178	0.478	0.548	-0.179	1.042	0.946	-0.056	-0.235	-0.379	0.519	-0.029	0.11	-0.314	0.056	0.506	1.225	0.088	2.026	0.101	0.328	1.055	1.007	1.892	0.427	0.549	0.538	-0.509	-0.32	0.898	0.197	0.523	0.462	0.357	0.027	1.213	0.274	0.286	1.048	0.711	-0.015	0.432	-0.191	0.066	0.56	0.161
151176	0.725	1.692	1.243	0.429	0.916	-0.126	0.309	-0.028	-0.127	2.873	-0.064	0.302	-0.405	0.216	0.469	0.679	1.033	0.641	1.201	0.583	-0.656	1.499	0.359	0.701	0.974	1.997	1.234	0.344	0.396	0.242	1.433	-1.642	0.722	0.598	-0.369	0.553	0.621	0.747	0.242	0.247	-0.327	1.697	1.278	-0.118	1.571	0.139	-0.334	0.799	0.414
10699	0.062	0.113	-0.45	-0.165	1.771	1.571	1.07	-0.749	0.092	0.029	0.939	-0.145	-0.145	-0.124	0.885	-0.157	0.795	0.528	0.533	-0.387	-0.342	-0.437	-0.147	-0.301	-0.326	0.159	0.314	2.605	0.077	-0.19	0.582	-0.584	0.598	-0.308	-0.085	1.391	2.459	-0.314	0.45	0.156	-0.114	0.123	0.081	-0.184	0.144	0.238	0.022	0	0.215
83661	0.352	-0.093	-0.579	-0.147	-1.176	0.492	0.085	0.771	0.605	0.001	1.231	-0.445	0.145	1.736	3.064	-0.443	1.12	-0.343	3.677	0.002	-0.563	-0.011	-0.627	-0.728	0.151	-0.219	-0.385	0.158	-0.909	-0.148	-0.176	-0.597	0.008	-0.779	0.647	0.191	-0.309	4.04	-0.89	0.536	-0.383	-0.293	-0.51	5.946	0.252	2.798	-0.932	-0.158	-0.299
57539	-0.293	0.892	0.671	1.033	-0.72	0.697	-0.675	-0.485	-1.246	-0.154	0.021	1.04	0.184	0.388	0.441	0.684	-1.042	1.29	1.218	0.772	1.1	0.101	0.88	-0.031	-0.158	0.166	0.112	0.726	-0.004	0.842	0.174	0.92	0.996	0.277	1.063	-0.274	0.094	0.255	0.451	-0.048	-0.608	0.507	2.341	1.211	0.207	-0.28	-0.423	0.315	-1.101
29082	0.346	-0.001	-0.027	0.083	0.323	0.687	-0.334	0.115	0.44	0.31	-0.146	0.48	-0.283	-1.245	0.551	-0.49	-0.929	0.019	0.436	0.042	0.809	-3.072	0.485	-0.082	0.241	-0.654	-0.339	-0.083	-0.406	-0.009	-0.214	-0.49	0.203	0.325	0.068	0.323	-1.279	-0.356	-0.287	0.394	-0.648	0.74	-0.844	0.129	-1.52	0.178	-0.617	-0.825	0.611
139322	0.554	-0.728	0.575	-0.399	-0.004	-0.444	0.711	0.573	-0.477	0.569	-0.019	0.011	-0.031	0.119	-0.236	0.361	0.298	-0.591	-0.397	-0.594	-0.23	0.972	0.231	0.68	-0.118	1.23	-0.701	-0.048	1.032	0.008	0.798	0.253	-0.706	-0.904	0.636	-0.303	0.432	0.82	0.263	1.561	1.504	-0.616	-0.995	0.036	0.885	0.951	-0.749	0.532	-0.23
127343	-0.478	0.129	0.287	0.27	0.361	-0.86	-0.191	-0.717	0.683	0.07	0.55	0.071	0.147	0.264	0.47	-0.058	0.805	-0.101	-0.636	0.608	-0.068	-0.006	-0.454	0.367	0.019	0.743	-0.796	0.441	-0.275	0.201	0.02	-0.414	-0.225	-0.189	0.177	-0.183	0.394	0.477	0.003	-0.84	0.228	0.144	0.55	0.039	-0.265	-0.79	-0.175	-0.119	0.361
90024	-0.648	-0.251	-0.024	-0.443	-0.185	-0.274	0.146	-0.228	0.113	0.234	-0.921	0.28	-0.017	-0.505	0.721	0.453	-0.475	-0.229	0.065	-0.246	-0.407	-0.346	0.04	0.021	-0.489	0.312	-0.663	-0.263	0.351	0.322	-0.278	-0.455	-0.141	-0.649	-0.496	0.326	0.234	-0.239	-0.211	0.077	0.016	-0.689	-0.179	-0.646	0.204	0.021	0.174	-0.332	-0.714
401106	0.103	0.179	0.08	0.769	0.24	-0.228	0.554	-0.989	0.983	0.622	-0.672	-0.147	-0.002	-0.201	0.537	0.466	0.402	-0.366	1.407	-0.432	0.346	0.716	0.2	1.385	0.061	1.088	0.175	0.689	0.524	1.542	0.484	-0.265	0.114	0.876	0.511	0.808	0.465	-0.287	-0.132	1.352	0.385	0.25	-0.854	1.145	-0.794	0.004	1.136	0.094	-0.886
387646	0.027	0.512	0.526	-0.457	0.749	0.334	0.104	0.007	0.956	0.074	0.371	0.232	0.051	0.044	0.672	0.035	-0.144	-0.041	2.18	-0.056	-0.32	0.433	0.511	0.047	-0.424	-0.505	-0.465	0.52	1.008	0.304	1.185	-0.534	-0.297	0.022	1.312	0.635	0.098	1.354	-0.167	1.747	1.352	2.452	1.198	-0.331	-0.091	0.36	-0.351	1.007	0.146
6447	0.91	-3.499	0.644	1.583	1.847	-0.488	0.911	-1.661	2.218	-0.773	-0.884	-1.231	1.068	0.971	-1.163	0.432	0.719	0.399	1.655	-0.815	0.211	-0.105	-1.541	1.308	-0.347	-0.21	-1.445	-0.855	-1.514	-1.208	0.766	0.441	0.497	-1.838	1.211	4.112	-1.245	0.609	1.667	1.244	-0.636	-3.768	-1.057	0.465	-2.219	2.034	0.34	-0.7	-1.189
4302	0.23	1.671	-0.211	0.275	-0.507	1.13	0.195	-0.636	0.421	0.529	0.766	0.068	0.648	0.891	0.295	0.435	0.086	1.478	1.682	-0.052	0.551	0.596	0.507	0.424	-0.941	0.503	1.475	0.592	1.2	0.045	-0.186	0.556	0.259	1.479	0.191	-0.095	-0.539	0.814	0.28	-0.244	-0.882	1.744	0.555	1.183	0.598	0.664	0.629	-0.355	0.174
7023	0.203	0.439	-0.372	0.066	0.835	0.542	0.236	0.269	-0.545	0.819	0.112	0.665	0.017	0.147	0.552	1.23	0.613	0.873	0.785	0.481	0.103	-0.207	-0.069	-0.05	0.705	1.139	0.006	0.588	1.125	1.033	-0.555	-0.726	0.842	0.152	-0.168	0.121	0.109	1.129	-0.566	-0.339	0.618	0.147	0.868	0.443	0.452	-0.787	0.645	0.917	0.476
5504	0.574	0.816	1.051	0.188	0.143	0.254	-0.438	0.377	0.673	0.029	0.73	0.621	0.866	-0.148	0.009	0.329	-0.054	0.839	0.282	0.589	0.487	0.679	0.678	0.499	-0.295	-0.087	0.029	1.027	0.767	0.429	0.462	-0.179	-0.265	0.742	0.104	-0.285	-0.371	0.126	0.491	0.063	0.456	0.366	-0.128	-0.153	0.811	0.884	0.575	0.103	-0.292
11251	0.082	1.714	0.074	0.183	2.211	-0.039	0.232	0.102	1.869	0.783	0.014	0.543	1.764	0.564	0.66	0.193	0.513	0.012	-0.199	4.82	0.774	0.878	0.085	-0.697	1.171	0.359	1.084	0.166	-0.129	0.573	0.628	-0.883	0.917	0.462	0.281	2.451	1.493	0.321	0.094	-0.555	0.841	0.565	0.357	2.167	1.035	-0.39	1.009	0.671	2.251
26024	0.482	0.639	0.933	0.077	1.026	0.465	0.579	0.014	1.311	1.354	0	0.861	0.664	-0.235	0.613	0.699	1.174	0.643	1.154	-0.04	0.294	1.015	0.699	0.65	0.817	1.263	0.861	0.177	1.213	0.912	0.675	-0.178	0.702	0.132	-0.057	0.844	0.958	0.082	-0.281	1.001	-0.179	0.646	-0.094	0.569	0.141	0.175	0.721	0.824	0.902
54472	-0.104	-0.211	-0.532	0.05	-0.489	-1.099	0.701	-0.193	0.522	0.309	-0.825	0.319	-0.576	0.261	0.029	-0.748	0.336	-1.275	-0.453	-0.627	-0.792	-0.266	0.231	-0.604	-0.115	1.304	-0.465	-0.207	-0.25	0.791	0.085	-0.923	0.299	-1.143	-0.122	-0.672	0.541	-0.466	-0.642	-0.001	0.311	-0.384	-0.858	0.03	-0.368	-1.106	-0.212	-0.039	-0.258
839	-1.068	-0.593	-1.182	1.095	0.342	-0.791	-1.184	0.674	0.177	0.398	0.029	-0.768	-0.344	-0.21	-0.399	-0.035	1.059	-1.547	-0.311	-1.131	0.021	-0.423	-1.081	-0.499	0.088	-0.532	0.494	0.055	-1.098	-0.668	-0.353	0.211	-0.305	-0.134	-0.345	-0.382	0.066	-0.658	-0.07	-0.792	0.098	-0.408	0.51	-1.166	-0.622	-0.519	0.632	0.382	1.256
2314	-0.684	1.382	-0.265	-0.047	-0.46	0.182	-0.429	0.692	0.806	-0.068	-0.259	-0.573	-1.011	0.685	-0.06	-0.02	0.107	-0.108	0.421	0.429	-0.617	-0.302	0.959	-0.107	-0.006	-1.269	0.022	-1.327	1.142	0.262	-0.498	-0.543	0.384	0.217	0.583	0.355	0.067	-0.442	1.237	-0.421	-0.819	0.726	0.335	-0.353	1.176	-0.014	0.747	-0.465	0.083
9404	0.453	-0.242	-0.45	-0.402	-0.833	0.544	-0.847	-0.486	-1.304	-0.237	0.515	-0.222	-0.523	-0.613	-0.532	-0.807	-0.329	0.494	-0.397	-0.958	0.975	-0.628	-0.677	-0.365	-0.547	-0.596	0.822	-1.167	-0.577	-1.012	-1.262	0.767	0.271	1.876	-0.872	-0.652	-0.253	-0.472	0.06	-1.316	-1.093	-0.681	-0.48	0.742	0.062	1.015	0.789	-1.56	-0.216
55509	-1.419	0.107	-1.38	0.031	-0.429	1.019	-2.01	-1.049	-2.113	-0.069	0.587	-1.622	-0.542	-0.565	-0.627	-2.208	-0.73	0.762	-1.674	-1.252	0.383	-1.13	-0.271	-2.48	-0.032	-1.584	1.463	-1.77	-1.301	-0.623	-1.036	-0.625	0.692	1.057	-1.185	-0.616	-0.218	-2.457	-1.9	-4.256	-2.815	-0.668	0.806	0.095	1.178	-0.663	0.012	-1.444	0.321
3217	-0.131	-1.904	-0.68	-0.727	-0.794	1.281	-1.223	-0.095	0.391	-0.393	0.234	-0.774	-0.731	1.08	-0.42	0.023	-0.954	0.883	-0.816	2.919	0.543	-0.351	-1.718	0.445	0.471	-0.904	0.93	-0.158	-0.73	0.161	-0.059	0.526	0.793	2.418	4.074	-0.975	1.041	1.569	-0.065	3.159	-1.727	-1.896	0.104	-2.094	0.854	0.414	2.242	0.015	0.591
5899	0.069	-0.86	-0.724	-0.482	-0.443	0.017	-1.064	0.911	0.596	0.093	0.076	-1.544	-0.695	0.2	0.224	0.672	-0.163	-0.458	-0.51	0.607	-0.656	0.39	-0.769	-0.096	-0.784	-0.469	-0.332	-0.393	-0.13	-0.446	-0.285	-0.073	-0.125	-0.511	-0.871	-0.554	0.015	-0.261	0.243	-0.073	-0.752	-0.774	-0.209	-0.049	-0.181	-0.003	-0.17	-0.865	-0.007
92935	-0.693	0.292	-0.343	-1.12	0.388	-0.029	0.142	-0.528	1.33	-0.113	-0.173	-0.309	-0.478	1.416	1.984	0.685	0.298	0.555	-0.028	1.773	0.029	1.735	0.333	0.82	1.272	-0.11	-0.183	-0.009	0.086	-0.784	0.476	-2.264	0.838	-0.229	0.124	0.072	0.827	0.973	0.516	-0.156	-1.518	-0.869	0.19	0.122	0.54	-0.888	0.664	-0.047	-0.459
442083	0.042	0.038	0.039	-0.355	0.134	-0.547	-0.169	-0.314	-0.033	0.169	-0.589	0.269	0.064	0.142	0.044	-0.016	-0.01	-0.111	0.096	0.213	-0.084	-0.23	0.105	0.042	-0.078	-0.096	-0.493	-0.006	0.024	0.264	-0.037	-0.923	-0.08	-0.469	-0.301	0.07	0.262	0.081	-0.339	0.585	0.464	-0.152	-0.243	-0.019	-0.576	-0.07	0.3	-0.25	0.333
4712	-1.163	-1.013	0.104	0.99	-0.039	-0.839	0.056	-0.136	1.246	0.029	-0.668	0.895	-0.81	-0.15	-0.68	-0.999	-0.37	-0.814	-0.4	0.408	-0.293	-0.046	-0.833	0.67	0.008	0.479	-1.015	0.23	-0.573	0.237	-0.559	-0.606	-0.733	-0.877	-0.613	-1.294	0.231	-0.372	0.611	-0.88	-0.065	-1.027	-1.414	-0.889	-0.041	-0.249	0.079	-1.332	0.522
28999	-0.088	0.721	-0.074	1.892	-0.009	-0.722	1.128	-0.134	1.837	-0.078	-0.845	1	-0.384	1.03	0.478	0.552	0.237	-0.537	0.259	-0.695	-0.936	0.418	0.362	-0.655	-0.73	0.964	-2.053	0.939	-0.681	0.429	1.195	0.601	-1.09	-0.099	1.36	0.225	1.398	0.456	-0.929	0.845	0.52	-0.603	-1.21	0.255	-0.16	0.759	1.199	-0.878	0.405
79901	0.108	-2.505	-2.258	-1.526	-1.699	1.095	-1.271	-1.339	-3.089	-1.85	0.594	-2.064	-1.315	-0.483	-2.131	-1.631	-1.135	0.568	-1.072	-3.526	-0.907	-1.753	-0.411	-2.457	-2.634	-3.022	-1.746	-3.045	-1.118	-2.423	-0.537	-0.32	-0.726	0.096	-1.233	-0.814	-2.206	-2.887	-1.93	-2.368	-2.034	-4.195	-3.009	-1.056	-0.285	0.209	-1.238	-1.336	-0.584
221002	-0.329	1.013	-0.38	-0.956	-1.799	3.875	-1.842	1.518	-0.438	0	0.517	-0.936	0.967	-0.418	-0.58	-0.151	0.089	0.829	1.042	2.066	1.061	-0.108	-0.104	-0.405	-0.998	0.168	-0.523	0.174	-0.21	-0.417	-1.233	3.163	-0.373	3.107	3.279	-1.878	-0.307	3.094	0.202	-2.121	-0.796	3.607	-0.066	0.503	0.458	0.566	0.185	-0.643	-0.869
5866	-0.179	0.681	-0.82	-0.178	-0.666	-0.368	-0.893	0.296	-1.002	-0.462	-0.017	-0.615	-0.172	0.12	-0.178	-0.416	0.178	-0.243	-0.817	0.204	-0.559	-0.444	-0.873	-0.067	-0.151	-0.414	0.875	-0.57	-0.85	-0.306	-0.048	-0.081	-0.045	-0.847	0.272	-0.734	-0.104	-0.825	-0.592	-0.544	-1.071	-0.817	0.426	-0.721	-0.924	-0.855	1.516	0.111	-0.337
389333	0.006	-0.079	-0.093	-0.032	-0.433	-0.03	0.003	-0.196	1.073	-0.348	-0.255	-0.384	-0.281	-0.142	-0.237	-0.038	0.238	0.251	-0.114	0.111	-0.184	-0.206	-0.366	-0.188	0.212	0.673	-0.307	-0.197	-0.161	-0.225	-0.184	-0.411	-0.29	-0.237	0.894	-0.231	0.009	0.18	-0.175	-0.489	-0.462	1.082	-0.497	-0.208	0.209	-0.64	-0.364	-0.297	0.161
394	0.192	0.52	0.638	-0.114	0.24	-0.036	-0.076	0.628	0.554	0.495	0.013	0.829	0.284	-0.201	-0.305	0.008	-0.545	-0.287	0.475	0.386	0.7	0.237	0.08	0.413	-0.113	0.235	0.383	-0.008	0.019	0.028	0.448	0.499	-0.266	-0.186	0.45	0.151	-0.323	0.099	0.382	1.203	-0.255	0.319	-0.713	0.278	0.519	0.304	-0.232	1.075	0.203
440982	-0.681	-0.571	1.952	0.778	-0.355	-1.144	3.626	1.378	1.728	-1.434	-1.913	-1.036	-0.165	3.24	0.387	-1.231	-0.978	-0.422	-0.228	-1.728	0.802	1.047	3.478	1.357	-0.98	2.527	0.189	1.183	1.338	1.435	1.269	-0.692	0.241	1.029	-0.123	0.024	2.754	-1.819	-0.792	-0.657	5.269	-0.484	-0.296	1.713	2.24	-0.031	1.514	0.198	0.407
255104	0.884	0.251	-0.201	1.294	-0.89	0.186	0.715	-0.098	0.884	0.744	-0.336	0.254	-0.647	0.13	-0.841	-0.724	0.313	-0.203	1.164	-1.541	-0.165	-0.75	0.42	-0.29	0.041	0.616	-0.673	-0.676	-0.497	0.442	0.732	0.926	-0.091	0.636	-0.097	-0.454	-0.033	-0.186	-0.635	0.333	-0.422	-0.459	-0.46	0.709	0.868	0.417	0.994	0.04	-0.199
151174	0.109	-0.121	0.362	0.251	0.089	-0.342	0.03	-0.107	0.093	0.338	-0.321	-0.146	-0.234	-0.109	-0.161	0.053	0.102	-0.13	-0.015	0.89	-0.433	0.432	0.04	0.208	0.166	0.718	-0.111	-0.33	0.097	0.344	0.047	-0.55	0.113	-0.058	0.366	-0.194	0.148	0.436	0.011	0.373	0.528	0.689	-0.11	-0.272	0.103	-0.373	-0.405	0.304	-0.033
22909	0.138	0.732	0.243	0.674	0.106	-0.641	0.867	0.094	0.591	0.341	-0.587	1.28	0.305	1.211	-0.047	0.473	0.054	0.089	0.753	-0.047	0.664	-0.164	1.308	0.788	-0.529	0.915	0.015	0.241	0.379	0.888	0.343	0.724	0.391	0.1	1.28	0.406	0.699	0.291	1.347	0.78	-0.096	0.075	-0.283	0.866	-0.141	0.261	0.215	0.405	0.216
990	0.56	3.195	2.879	1.054	3.059	1.936	4.122	4.3	2.646	1.457	3.117	1.134	1.696	3.784	1.694	4.114	3.329	0.255	2.171	2.972	2.415	2.276	1.328	4.428	3.485	1.273	3.446	1.626	2.218	1.011	1.526	-0.78	2.717	2.262	2.085	1.98	1.589	3.59	4.545	2.44	2.675	3.075	3.157	2.433	1.348	1.129	1.27	3.253	3.111
340357	-0.092	-0.039	0.072	0.421	-0.034	-0.331	-0.353	-0.674	0.34	0.141	-0.055	0.269	-0.575	0.039	0.183	0.26	0.159	0.118	-0.035	0.17	-0.279	-0.185	0.165	-0.374	-0.14	0.387	-0.41	0.048	-0.402	-0.029	0.278	-0.298	-0.627	-0.334	-0.1	0.168	0.437	0.08	0.267	0.459	-0.383	0.411	-0.076	-0.526	-0.103	0.198	-0.303	0.219	0.237
1717	0.832	0.08	-0.925	0.564	1.74	0.066	1.033	1.232	0.509	1.425	-0.435	0.308	1.297	1.224	0.415	-0.84	0.749	-1.185	0.128	-0.886	-0.372	0.649	1.004	0.915	1.587	-0.375	0.293	-0.074	-0.453	-0.264	1.328	-0.802	0.984	-2.12	0.055	0.368	0.965	0.399	0.657	1.523	-0.516	-4.193	1.098	-0.933	-0.325	0.497	-0.126	-0.072	0.225
285835	1.028	0.756	0.8	-0.542	-1.722	0.337	1.963	0.451	0.491	0.266	-0.134	1.067	0.898	0.251	0.463	0.022	-0.42	0.209	1.672	0.478	0.685	1.069	0.896	1.761	-0.777	0.9	-0.793	0.235	1.151	-0.453	0.583	0.217	0.43	1.321	0.383	0.219	0.129	-0.204	0.479	2.252	0.804	-0.649	0.75	0.522	0.636	0.991	0.685	0.314	0.303
197	-0.319	-0.202	-0.505	-0.056	0.504	-0.553	-0.117	-0.16	0.351	-0.803	-0.64	-0.17	0.142	0.053	0.033	-0.746	-0.384	0.052	-5.174	0.209	-0.778	-1.619	-0.094	0.013	0.068	0.013	-0.41	-0.112	-0.229	-0.021	0.097	-0.926	-0.096	-1.265	-0.15	0.589	0.051	-1.051	0.13	-0.784	0.631	-0.317	-0.145	-0.203	-0.4	-0.158	-0.587	-0.464	0.011
64399	-2.858	-3.704	-2.593	0.421	-1.677	-1.662	-2.897	-2.451	-2.619	-3.477	-1.43	-2.045	-0.681	-2.58	-3.118	-3.876	-3.012	-2.356	-3.04	-1.218	-0.615	-4.053	-1.655	-3.08	-3.015	-3.336	-2.806	-2.668	-3.432	-2.465	-3.476	-2.637	-2.185	-2.494	-3.306	-1.468	-3.481	-3.579	-1.828	-2.19	-4.455	-2.98	-3.196	-3.232	-2.975	-2.414	-2.889	-2.732	-2.753
10516	0.942	-2.343	-2.065	-1.501	-2.638	0.906	-2.743	-2.496	-2.432	0.682	0.562	-1.631	-0.612	0.505	-3.72	-4.689	-1.637	0.543	-1.973	-2.878	-0.83	-1.009	-0.133	-1.824	-4.387	-3.642	-2.649	-4.017	-1.534	-2.23	-0.863	0.676	-0.827	0.867	-3.298	-1.279	-3.749	-2.095	-4.425	-3.049	-5.995	-4.891	-1.812	0.159	0.391	-0.128	-1.669	-0.084	-0.552
7145	-0.4	0.55	-0.611	0.655	-0.417	0.098	-1.018	0.645	0.111	-0.405	-0.193	0.67	0.02	-0.559	-0.159	0.074	1.498	-0.895	0.032	-0.122	0.373	-0.254	-0.666	-2.132	-0.3	-0.027	-0.124	-0.993	-1.079	-0.416	-0.1	0.496	-0.478	0.711	0.592	-0.044	-0.003	-0.523	0.78	-0.963	-0.299	-0.137	1.496	0.311	0.645	0.778	-1.288	0.297	0.424
57475	-0.693	2	0.916	-1.499	1.913	-0.431	-1.066	0.852	1.692	-1.296	0.181	0.357	1.435	0.383	0.705	-0.322	0.237	3.087	1.498	2.106	-0.588	1.775	1.288	-0.622	1.121	-0.957	3.607	-0.486	1.81	-0.539	1.535	0.254	1.351	0.974	1.551	1.367	0.022	1.299	1.649	-1.76	0.258	2.647	1.665	0.401	0.162	-0.118	1.231	1.789	1.654
54014	-0.686	0.81	-0.719	0.572	-0.391	-0.564	-0.561	-0.52	-0.919	0.562	-0.533	0.402	0.781	0.124	-0.344	-0.185	0.345	0.192	-0.017	-0.908	-0.343	-0.543	-0.495	0.373	-0.499	0.413	0.27	-0.015	-0.945	-1.075	-0.784	0.735	-0.568	0.174	0.758	-0.184	-0.454	-0.004	0.04	0.217	-0.776	-0.877	-0.082	0.815	-1.583	0.358	0.039	0.211	0.345
348926	-0.186	0.259	0.307	-0.401	-0.011	-0.498	0.201	-0.615	0.522	0.431	-0.376	0.089	0.183	-0.001	0.654	0.138	-0.318	-0.58	-0.054	-0.039	-0.228	0.068	-0.06	0.203	-0.265	0.496	-0.364	0.923	-0.075	0.056	0.175	-0.278	-0.429	-0.276	-0.04	-0.277	0.116	0.164	-0.466	-0.085	0.107	0.137	0.011	-0.083	-0.118	-0.857	-0.412	-0.044	0.232
652627	0.149	0.682	0.048	-0.683	0.627	0.373	0.188	-0.291	0.614	0.304	-0.089	-0.308	-0.35	0.481	1.369	0.499	0.844	-0.387	0.901	0.67	-0.051	0.468	0.977	0.067	0.222	0.436	-0.265	0.404	0.363	0.539	0.61	-0.603	0.189	-0.298	0.281	-0.197	0.426	0.534	0.042	0.209	0.009	-0.124	0.521	-0.284	0.148	0.055	0.817	-0.102	0.015
51275	-0.27	1.281	0.304	-0.968	0.019	0.137	0.881	1.799	0.1	0.345	0.493	0.543	0.971	0.713	-0.451	0.634	0.522	1.314	0.232	0.293	1.02	-0.026	0.479	1.212	0.914	0.235	0.738	-0.897	0.321	-0.166	0.241	0.966	0.401	0.806	1.374	0.678	0.148	-0.245	1.979	0.232	0.864	2.363	1.426	0.935	0.48	1.229	0.499	0.378	0.516
65249	0.198	1.163	0.157	0.429	-0.895	1.754	-0.368	0.28	-0.698	0.283	1.318	-0.037	0.502	-0.115	-0.575	0.048	0.485	1.015	-0.085	-1.692	0.725	0.166	-0.735	-1.069	-0.378	0.559	-0.078	-2.014	-0.795	-1.206	0.095	0.378	-0.497	1.124	0.241	-0.969	-1.28	0.834	-0.794	-1.05	-0.33	0.254	1.757	0.408	1.339	-0.05	-0.31	0.659	1.791
1824	0.1	0.516	0.062	0.291	0.972	-1.473	-2.212	-0.171	-0.252	-0.947	0.08	-0.987	1.329	0.23	1.207	-0.289	-0.038	-0.421	0.302	-1.633	-0.391	1.425	0.206	-1.361	0.325	-1.253	1.634	-0.421	-1.457	-0.419	0.959	-0.042	0.446	-1.234	-1.44	-0.234	-0.331	-0.468	0.718	-0.039	0.138	0.34	-0.876	-1.451	-0.892	0.759	2.781	-0.061	0.846
90313	0.096	-0.346	-1.718	0.854	-0.159	-0.109	1.109	0.723	0.937	0.641	-0.227	0.391	-0.353	-0.212	-0.814	-0.129	0.399	0.229	-0.871	-0.454	-0.726	-1.053	-0.828	-0.381	0.162	0.172	-0.903	0.488	-1.135	0.251	-0.365	0.161	-0.452	0.317	0.354	-0.92	0.354	0.696	0.205	0.776	0.156	1.079	-0.347	0.556	-1.464	0.318	-0.196	0.431	-0.245
708	-0.897	-0.834	-0.655	0.088	0.189	-0.572	-0.602	-0.161	-0.399	-0.356	-0.369	-0.701	-0.965	0.009	-0.431	-0.564	-0.291	0.195	-0.214	0.224	-0.657	-0.365	-0.169	-0.295	0.114	-0.861	0.055	-0.207	0.284	0.003	-0.363	-0.795	0.09	-1.302	-1.173	0.368	0.618	-1.417	0.032	-0.363	-0.761	-1.901	0.157	-1.2	0.456	-0.937	-0.123	-0.479	0.63
54360	1.49	0.986	-1.156	-0.113	-2.093	2.009	0.046	0.99	-0.801	1.186	1.286	-0.438	0.418	1.591	0.462	-0.97	-0.561	1.704	1.804	0.445	0.53	-1.478	-0.24	1.039	0.857	-0.116	1.26	0.451	2.166	-1.437	-0.056	2.938	0.271	2.571	-0.414	-0.445	-1.804	-0.775	0.115	1.015	-0.228	-0.124	-0.227	0.202	1.422	0.744	1.915	-0.531	0.207
6453	-0.967	-1.033	-0.769	-1.162	0.192	-0.989	0.61	0.831	0.084	-0.222	-0.072	-0.294	-2.751	-0.323	0.029	0.415	-0.348	-1.087	-0.249	-0.39	-1.012	0.237	-0.033	0.122	0.492	-0.156	-0.404	-0.521	-1.242	-0.351	0.229	-0.854	-0.289	-0.75	1.122	-1.217	0.001	0.259	0.148	0.808	1.294	-1.322	-0.33	-0.209	-0.22	0.041	0.473	0.243	-1.613
84517	2.442	-1.127	-1.021	-1.137	-0.263	-0.546	-2.054	-1.439	-1.842	0.209	-0.9	-1.372	0.726	-0.381	-0.324	0.083	-0.139	-0.636	-0.859	-0.842	-0.878	-0.239	-0.493	-1.468	1.567	-1.081	-1.538	0.297	0.167	1.744	-0.942	-2.86	0.301	-1.228	-1.138	0.148	0.91	-0.133	-2.692	-0.484	-0.245	0.944	-1.319	-0.264	-1.517	-0.457	1.252	-0.242	-0.332
9369	0.985	3.124	-0.247	-0.861	1.923	0.716	-0.081	0.634	0.064	0.36	0.353	-0.263	1.041	0.388	-0.214	-0.534	0.021	3.361	0.71	0.084	-0.153	-0.287	-0.114	-0.463	3.596	0.052	0.824	0.117	-0.244	-0.179	0.156	-0.471	2.176	0.453	1.698	0.79	-0.555	0.241	0.024	0.112	-0.467	1.667	0.698	0.073	0.939	0.48	-0.301	1.89	1.12
388406	0.013	0.053	-0.076	0.62	0.28	0.126	-0.042	-0.013	0.568	-0.274	-0.246	-0.051	0.185	-0.143	0.259	-0.061	-0.196	-0.034	0.761	-0.039	-0.624	-0.274	-0.456	0.245	-0.151	-0.684	0.283	-0.404	-0.577	0.06	-0.053	-0.385	-0.232	-0.188	-0.17	0.363	0.399	0.078	0.249	-0.083	-0.325	0.87	-0.078	0.246	-0.511	-0.79	0.111	-0.099	0.507
56961	1.363	-0.443	-0.912	2.225	-0.694	-2.24	2.399	0.101	1.35	0.375	-1.516	0.167	-1.405	1.304	-0.987	1.243	-0.467	-1.616	0.368	-2.655	-0.162	-1.54	-0.917	0.685	-0.544	0.237	-3.273	-0.123	-1.151	-0.464	-1.475	2.665	-0.952	-0.24	0.917	-0.411	0.238	-0.278	0.579	0.312	1.666	-1.508	-3.622	-0.54	-5.429	1.512	-1.944	0.3	-0.783
389273	0.108	0.54	0.046	0.132	0.36	0.067	-0.33	-0.426	0.16	0.115	-0.197	0.112	-0.074	0.394	0.171	0.051	0.368	-0.269	0.043	-0.404	-0.108	-0.053	-0.19	-0.05	-0.101	0.043	-0.592	0.203	-0.175	0.327	0.145	-0.403	-0.541	-0.514	0.139	-0.502	-0.07	-0.015	-0.052	0.254	-0.223	0.893	0.111	0.143	-0.226	-0.05	-0.392	-0.056	0.56
340542	1.194	-0.001	-0.832	-3.204	-1.324	-0.881	0.64	0.14	1.479	-0.794	0.066	-1.386	-1.239	2.581	1.313	0.596	-2.731	-2.847	-4.324	1.012	-0.886	1.123	0.095	-2.517	-1.338	-3.103	-1.945	-4.071	0.397	-2.518	0.164	-1.061	-0.605	0.043	-0.696	-0.968	-0.31	-3.86	0.841	-2.239	1.289	-3.828	-0.689	1.364	-0.025	-0.854	-0.662	0.707	-1.567
1909	-0.046	-0.802	-0.313	-0.46	0.282	1.222	-1.164	0.813	-1.955	-2.851	0.586	-0.663	0.383	0.443	-2.225	0.193	0.661	1.622	1.075	-1.378	-0.116	0.54	0.709	-0.809	-2.206	-2.689	1.411	-2.428	1.384	-0.26	-0.546	1.014	0.304	1.103	-1.101	0.934	-2.031	-1.622	-0.038	-0.252	-3.052	-2.767	-0.794	1.075	1.164	1.701	-0.685	-0.449	0.821
414149	0.328	1.392	-0.347	0.896	2.471	-0.181	2.398	1.215	1.372	1.818	-0.518	0.256	0.511	0.318	1.567	2.602	1.824	-0.644	1.345	1.956	1.33	0.596	0.468	1.245	0.575	2.545	-0.641	0.716	-0.005	0.545	1.537	0.724	0.867	1.455	2.035	0.59	1.319	0.773	1.14	0.114	3.067	3.471	-0.304	1.7	-0.757	1.434	-0.099	0.13	1.759
130367	-1.509	-2.277	-1.976	-2.703	-2.158	0.586	-0.883	0.044	-1.551	-0.657	1.518	-1.959	-0.319	-3.016	-1.362	-2.317	1.054	-0.195	2.283	-2.311	-0.56	-2.251	-0.938	-3.455	-1.764	-1.878	0.473	-3.804	-1.337	-2.317	0.656	-1.217	-0.481	1.937	-3.093	-2.38	-1.511	-1.931	-0.809	-3.874	-3.55	-0.052	1.033	1.185	-0.429	1.499	-1.048	2.02	-1.325
6623	1.611	-0.9	1.821	-0.824	-1.027	2.846	-0.556	-0.443	-0.453	0.237	0.547	-0.309	0.352	-0.087	-0.035	-0.361	2.124	-0.063	1.829	0.274	0.2	1.965	-0.203	0.409	-0.385	0.409	1.44	-0.032	1.073	0.455	-0.378	0.531	0.358	0.154	-0.803	-0.346	-0.062	1.146	-0.989	-0.367	-0.475	0.265	3.781	0.443	0.107	-0.066	3.816	0.999	0.713
202374	-0.135	-0.081	0.164	0.677	0.317	-0.327	0.323	-0.383	-0.119	0.067	-0.046	0.186	-0.255	-0.438	0.35	-0.117	0.487	-0.286	-0.152	-0.269	-0.501	0.009	-0.379	0.011	0.131	-0.032	-0.521	-0.277	0.004	-0.108	1.6	-0.209	0.085	-0.223	-0.005	-0.024	0.113	0.029	3.64	-0.024	-0.102	0.94	-0.139	-0.203	-0.177	-0.298	-0.18	-0.158	-0.111
79187	-0.174	-0.403	-0.073	0.214	-0.027	-1.106	0.014	-0.606	0.299	-0.221	-0.437	-0.285	-0.583	-0.046	0.452	-0.195	-0.424	-0.457	-0.414	-0.557	-0.106	-0.654	-0.054	0.195	0.245	0.385	-0.851	-0.174	-0.242	0.137	-0.043	-0.797	-0.623	-0.178	-0.202	-0.068	0.231	-0.179	0.01	0.182	-0.219	-0.071	-0.619	-0.68	-0.68	-0.703	-0.716	-0.536	-0.066
2214	-1.307	-1.919	-1.972	0.413	-0.598	-1.015	-0.728	-0.2	-3.911	-2.153	0.044	-2.123	-2.013	-0.677	-0.402	-1.634	-1.115	0.097	-1.569	-0.176	-1.781	-1.793	-2.016	-0.971	-0.667	-2.345	0.751	-1.481	-2.813	-0.872	-1.905	-2.061	-1.277	0.117	-3.513	-2.861	-0.011	-2.845	-0.153	-1.429	-1.496	-2.702	-0.513	-1.9	-1.141	-0.424	2.365	-3.152	-1.739
5925	-0.528	-1.11	-0.62	0.255	-0.623	0.113	-2.01	-0.665	-2.737	-0.201	0.549	0.202	-0.082	0.619	0.268	-0.457	-0.9	0.206	-0.137	1.033	0.164	0.111	-0.605	0.406	-0.244	0.259	0.514	-0.141	-0.222	-0.772	-1.282	-0.116	-0.472	0.252	-2.369	0.091	-0.838	-2.097	0.592	-1.028	-2.28	-2.622	-0.667	-0.149	0.579	0.513	0.307	-1.132	0.181
54997	0.339	1.458	1.097	-0.37	-0.552	2.722	-2.093	-1.18	-1.82	1.011	1.511	-0.762	0.352	-0.002	-1.157	-1.365	-0.518	-0.434	3.228	0.017	1.262	1.741	-0.896	-1.147	-0.733	-1.049	1.576	-0.434	1.03	-0.459	-1.157	-0.282	0.848	1.208	-0.581	0.908	-1.174	1.129	-0.444	-0.045	-2.384	-0.55	2.58	-0.342	1.985	-0.075	-0.23	2.396	1.444
10745	-0.143	-0.673	-0.906	0.086	0.01	0.12	-0.388	0.671	-0.269	0.074	-0.332	-0.219	0.024	-0.46	0.857	1.101	-0.868	-0.265	0.308	0.375	0.714	-0.008	-0.048	0.592	0.253	-0.032	0.268	1.129	-1.036	0.343	-0.352	0.611	0.201	0.921	0.011	0.254	0.912	-0.303	1.125	0.556	0.564	0.728	-0.004	0.332	0.022	0.653	-0.415	-0.493	-2.128
57192	0.293	-0.132	0.067	-0.056	-0.859	0.336	-0.218	-0.429	-0.688	0.434	-0.266	-0.775	-0.832	0.013	0.524	0.334	-0.17	0.264	-0.513	0.515	-0.035	0.085	-0.534	0.563	0.291	-0.037	1.037	-0.613	0.3	0.603	-0.683	-0.935	-0.123	-0.027	0.123	-0.765	0.047	-0.225	0.026	0.177	-0.664	-1.409	0.605	-0.24	-0.13	0.09	1.046	-0.469	0.371
158431	-0.207	-0.081	0.743	-0.02	0.673	0.085	1.938	1.048	1.268	0.227	0.088	0.478	1.088	0.537	-0.141	1.594	0.395	0.31	-0.12	-0.019	1.229	0.182	0.529	1.272	0.75	0.473	0.277	0.151	0.367	-0.431	0.561	0.967	-0.29	0.886	1.463	0.078	0.501	1.167	1.424	3.359	0.59	0.32	0.606	0.095	0.43	0.306	-0.272	0.298	0.872
116986	-0.195	-0.025	-0.278	-0.04	-1.016	0.842	0.806	0.478	-0.047	-0.291	0.765	-0.222	-0.068	0.19	-0.147	-0.036	0.23	0.08	-0.402	0.084	0.565	0.205	-0.122	-0.299	-0.082	0.507	0.218	-0.029	0.499	0.266	-0.062	0.38	0.477	1.424	0.309	-0.548	-0.218	-0.312	0.094	0.128	-0.323	0.323	0.054	-0.191	1.51	0.59	0.468	-0.488	0.348
988	0.859	-0.287	2.005	0.383	-0.075	0.078	0.427	0.576	-0.048	0.06	-0.137	0.943	0.609	0.33	-0.374	1.3	-0.028	0.021	0.614	0.04	-0.149	0.966	0.758	0.391	-0.055	0.322	0.024	-0.239	1.064	0.113	-0.195	0.531	0.099	-0.517	0.117	0.341	0.491	0.206	0.015	1.8	0.57	0.013	-0.346	0.104	-0.083	0.445	0.19	0.787	0.438
10513	-0.56	-0.272	0.244	-0.621	0.184	-0.14	-0.213	0.001	0.38	-0.891	0.222	0.334	-0.001	0.637	0.652	0.214	-0.456	-0.948	-0.03	0.669	-0.512	0.297	-0.091	-0.044	-0.667	-0.251	0.238	0.936	-0.254	-0.245	0.576	-0.519	-0.511	-0.303	-0.191	-0.389	-0.198	0.546	0.876	1.058	0.525	-0.565	-0.145	-1.521	0.128	-0.353	-0.301	-0.339	-0.381
57644	-0.33	-0.034	-0.131	0.822	0.028	-0.522	0.546	0.291	-0.086	0.36	-0.942	0.09	-0.259	-0.279	0.357	-0.498	-0.033	-0.063	0.104	-0.346	-0.743	-0.872	-0.008	-0.186	-0.291	0.465	-0.143	0.197	-0.295	0.384	-0.229	-0.505	-0.104	-0.281	-0.087	0.104	0.517	0.407	-0.183	0.012	-0.325	0.012	-0.288	-0.349	-0.725	-0.477	-0.255	-0.371	-0.06
57645	0.307	1.589	0.691	-0.617	0.498	0.824	0.594	0.509	0.741	1.122	1.715	0.473	0.712	0.63	0.211	0.798	0.993	0.959	0.87	1.022	0.524	1.229	0.472	0.459	1.213	0.453	0.77	-0.071	0.76	0.047	1.115	-0.306	0.39	0.398	1.07	0.649	0.173	1.396	0.099	0.284	0.314	0.93	0.845	1.04	1.253	-0.108	0.635	1.276	0.988
9826	-0.194	2.241	0.64	0.119	0.064	1.067	1.257	0.791	1.613	1.393	1.357	0.483	0.844	0.316	0.228	1.238	1.761	1.01	1.244	0.886	0.21	0.791	0.794	0.512	0.829	1.044	0.84	1.778	2.67	1.082	1.069	0.78	0.303	1.095	2.207	1.315	0.66	2.078	0.076	0.758	0.805	1.757	0.51	1.69	1.585	0.096	0.48	1.344	2.032
731151	0.28	0.792	1.254	0.734	0.479	0.453	0.845	0.697	0.269	0.661	0.215	0.401	0.78	-0.104	0.399	1.319	1.887	0.968	-0.138	0.916	0.08	0.953	-0.289	-0.459	0.538	0.156	0.972	-0.767	1.134	0.646	1.868	0.588	-0.03	0.724	1.759	0.266	0.053	0.951	0.683	1.135	1.762	2.466	0.723	1.147	1.445	-0.046	0.408	2.27	1.391
10873	0.267	0.859	0.121	0.394	-0.391	0.723	-0.656	-0.76	-2.179	-0.268	0.248	0.125	-0.809	-1.083	-1.452	1.381	0.544	0.147	1.133	-2.206	-0.353	-0.042	0.788	0.217	-0.054	-0.451	-0.136	-0.592	-0.54	-0.36	0.16	0.837	-0.797	0.301	0.351	-1.237	-0.68	0.5	-0.365	-0.834	-0.299	0.35	-0.035	-0.108	0.787	0.663	1.628	0.577	-0.574
23233	-0.48	0.664	0.371	0.3	0.533	0.135	-1.021	-0.037	-0.122	0.201	0.341	0.326	-0.052	0.215	-0.437	0.141	0.144	0.659	0.081	1.256	0.31	0.33	0.956	-0.183	0.782	0.303	0.047	-0.056	1.264	0.365	0.501	0.219	0.458	-0.4	1.239	-0.245	0.295	0.428	-0.2	0.12	-0.04	-0.45	-0.084	0.284	-0.266	0.652	0.135	0.829	-0.077
51224	0.022	-0.074	-0.351	-0.415	0.103	-0.767	0.101	-0.44	0.143	-0.072	-0.519	0.157	-0.242	0.08	0.128	-0.083	-0.064	0.131	-0.138	0.081	-0.32	0.104	-0.174	-0.201	-0.255	0.143	0.11	-0.106	-0.5	0.069	0.273	-0.204	-0.236	-0.268	0.288	0.34	0.354	0.164	-0.266	0.39	-0.108	0.087	0.179	-0.369	-0.102	-0.465	-0.106	-0.052	0.071
126321	-0.276	0.8	-0.54	-0.147	0.128	0.495	0.125	-1.153	0.697	-0.041	-0.076	-0.965	-0.816	0.755	-0.284	0.511	-0.004	1.491	-0.121	1.327	0.239	-0.962	0.456	-0.017	0.438	0.502	0.706	0.305	0.271	0.42	-0.417	1.504	0.455	1.208	-0.938	-0.272	0.102	-0.071	0.068	-1.247	-0.453	1.023	0.419	0.255	0.538	0.203	1.61	-0.56	-0.211
26229	0.277	0.713	-0.135	-0.414	0.167	0.68	0.652	0.324	0.22	0.868	0.036	-0.059	-0.322	0.841	-0.035	1.116	1.179	-0.374	0.127	-1.173	0.329	0.102	0.783	0.364	0.452	0.286	0.396	0.275	0.114	0.203	0.302	0.966	0.842	0.158	-0.367	0.216	0.226	0.38	0.449	-0.87	0.259	1.644	0.075	2.104	0.752	-0.459	0.826	0.694	0.711
284029	-0.864	-1.013	-0.71	1.613	-0.9	-0.97	-1.227	0.541	0.37	0.11	-0.757	-0.299	-0.873	0.299	-0.53	-0.485	-1.988	-0.621	0.284	-1.477	0.382	-0.767	0.176	-0.053	-1.246	0.573	-1.008	-0.369	-0.204	1.027	-1.501	1.858	-0.155	0.108	-1.939	0.074	0.725	-2.463	0.644	0.643	0.396	-1.853	-0.638	0.306	-1.537	0.47	0.487	-1.564	0.311
84217	1.157	-4.212	0.16	0.493	-0.653	-0.309	-1.055	-1.632	-2.488	-0.595	-2.205	0.968	-2.424	-2.612	-0.794	-1.19	-2.969	-2.926	-1.014	-1.851	-2.447	-1.02	-0.21	-0.152	-2.12	-1.008	-2.601	-1.048	-0.065	1.467	-1.311	0.606	-2.764	-1.741	-1.591	0.327	-0.739	-0.414	-1.657	0.099	1.301	-4.988	-3.921	-0.016	-1.517	0.015	-3.35	0.044	-2.618
10202	1.624	0.528	-5.97	2.265	-2.693	-3.637	1.448	-1.141	-2.871	3.689	-2.664	0.697	1.429	1.682	0.36	3.652	-3.017	0.364	-2.095	2.483	1.567	-3.895	0.816	2.504	0.52	-0.586	-2.481	3.094	1.179	1.905	-5.481	-2.349	-1.839	-3.517	1.685	3.614	4.922	-0.293	1.608	0.653	-3.706	-3.745	-1.103	-0.623	-5.674	0.61	0.681	-0.423	0.766
389816	-0.195	0.024	0.039	-0.115	0.504	-0.415	0.094	-0.663	0.113	0.253	-0.344	0.11	-0.243	0.154	0.299	-0.093	-0.141	-0.203	-0.22	0.24	-0.469	-0.187	-0.227	-0.237	0.087	0.37	-0.563	0.266	-0.095	0.066	-0.004	-0.638	-0.224	-0.645	0.055	0.044	0.455	0.474	-0.179	0.242	0.078	0.126	-0.137	-0.516	-0.167	-0.689	0.305	-0.212	-0.19
54511	-1.341	-3.343	-2.424	1.05	-3.784	-1.843	-0.878	-1.447	-2.974	-2.941	0.135	-1.954	-1.744	-1.687	-3.705	-3.23	-2.692	-1.715	-2.44	-2.649	-2.758	-2.593	-2.206	-1.686	-2.33	-2.699	-1.399	-2.112	-1.993	-3.29	-2.46	-0.138	-2.956	-2.524	-2.457	-1.516	-3.145	-4.026	-1.774	-1.563	-3.267	-2.204	-3.537	-2.136	-2.84	-2.927	-1.045	-3.576	-1.218
6093	0.213	-0.146	0.253	0.031	0.466	0.414	0.09	0.092	-0.611	-0.011	0.875	0.626	0.431	-0.178	0.133	1.067	0.336	0.136	0.286	-0.44	0.349	0.715	-0.042	0.163	0.235	-0.436	0.025	-0.917	-0.577	-0.12	-0.385	0.713	-0.128	-0.369	0.615	0.084	-0.357	0.164	0.447	-0.339	0.643	0.089	-0.278	0.182	0.094	0.667	0.467	0.243	-0.003
20	-0.895	0.314	0.305	1.358	-0.123	-0.818	0.08	-0.188	-0.428	0.956	0.132	0.026	-1.667	0.318	-0.57	-1.311	0.836	-0.24	1.081	-2.975	-0.587	-0.355	-1.142	0.312	-0.996	0.033	-0.193	0.225	-1.963	-0.185	-1	0.753	-0.595	0.609	0.14	-1.339	-0.355	0.277	0.173	0.064	-0.546	-0.107	1.031	0.817	1.056	0.707	1.251	0.108	0.145
2205	-0.652	-2.97	-2.947	-2.871	-3.091	0.862	0.836	-3.111	-1.769	-1.946	0.709	-2.446	-1.999	-1.603	-5.177	-1.294	-1.446	-1.606	-2.585	-0.81	1.849	-2.202	-1.462	-2.932	-1.956	-4.134	-1.386	-5.1	-1.611	-2.55	-1.164	-1.725	-0.979	-2.512	-1.506	-3.33	-4.796	-4.117	-0.869	-1.313	-3.498	0.291	-2.802	-2.256	-1.842	-0.019	-2.82	0.559	-1.735
55739	-0.815	-1.486	-0.74	0.446	-0.647	-1.476	0.395	-1.003	0.882	-0.5	-0.606	0.162	-0.632	-0.026	-1.101	-2.015	-1.875	-0.163	-1.058	-0.628	-1.309	-1.416	-1.009	0.118	-0.971	-0.338	-1.635	-0.468	-1.124	0.376	-0.651	-0.096	-0.905	-0.738	-1.199	-0.392	0.567	-0.166	-0.132	-0.535	-1.444	-1.341	-2.062	-0.086	-0.048	-0.51	-0.918	-1.613	-0.85
57761	2.227	2.738	-0.75	0.068	1.444	0.648	0.804	1.522	0.444	1.181	0.805	-0.065	0.766	0.034	0.077	1.448	3.339	0.216	1.229	0.045	0.832	-0.967	0.432	0.341	1.58	0.658	0.193	-0.205	-0.004	-0.825	4.153	1.112	0.872	-1.883	2.712	0.975	1.726	0.57	3.465	-1.63	-0.19	3.323	2.338	0.681	1.834	-1.153	0.361	3.026	1.791
27345	-0.391	-0.611	-0.69	0.581	0.396	0.252	-2.864	-1.46	3.131	-2.437	-0.122	-1.948	-1.876	0.864	-0.732	-0.953	-0.598	0.892	0.142	-0.222	0.002	-1.185	0.244	-2.258	2.067	-1.873	0.401	-0.175	-1.319	-1.316	-1.107	0.16	1.768	0.113	-2.155	-0.389	0.012	-2.455	1.069	-0.855	0.504	3.494	1.776	0.046	0.374	-0.142	-0.578	-1.782	-0.06
64782	-0.234	0.901	-0.978	-0.521	0.28	-0.464	-0.304	1.068	-1.197	0.336	0.676	0.163	-0.726	1.213	1.473	1.036	0.377	0.212	0.224	1.887	0.784	0.605	0.416	-0.613	-0.793	0.514	0.121	0.897	0.043	0.697	0.216	-0.977	-0.45	0.331	-0.531	0.114	1.202	0.702	1.178	-1.067	-1.064	-0.777	0.311	-0.523	1.522	-0.684	1.026	-0.81	-0.149
26585	-2.296	-1.37	0.015	-2.042	0.574	-0.898	-1.834	1.184	2.754	0.956	1.114	-1.114	-2.367	-3.183	0.946	0.81	1.343	0.005	0.78	-2.383	1.257	-2.575	1.611	-1.839	-1.395	0.854	-1.104	-0.178	1.955	-1.295	0.151	-0.867	-0.798	1.165	-4.236	1.59	-1.556	0.486	1.935	2.941	-2.779	-1.224	-1.736	-0.217	0.272	3.074	0.74	-2.007	-1.133
121601	0.114	0.408	-0.308	-0.299	0.551	-0.653	0.168	-0.537	0.397	0.421	0.084	0.276	-0.064	-0.265	0.695	0.471	0.269	0.544	0.337	0.152	0.159	0.047	0.513	0.991	0.037	0.42	0.225	-0.234	0.248	0.184	0.012	-0.376	0.012	-0.122	-0.117	0.312	0.017	0.496	-0.766	0.173	-0.015	1.824	1.437	0.167	-0.226	0.444	0.737	0.047	-0.287
6875	-1.759	-1.781	-2.265	-0.996	0.466	2.331	-1.034	0.08	-2.897	-2.469	1.092	-0.819	-0.196	-1.466	0.475	-2.105	-1.006	2.46	-2.412	-0.915	0.932	2.887	-0.668	-2.704	0.78	-0.388	1.461	-1.936	0.105	-2.189	-0.839	-0.521	-0.128	2.454	-0.124	-0.809	-1.096	-1.756	-1.532	-2.32	-1.649	0.008	-1.291	-0.147	-0.764	0.758	0.335	-2.119	-0.282
133418	0.306	-0.995	-0.496	0.252	-0.998	1.628	-0.208	2.461	-2.555	-1.043	0.835	-1.393	0.188	-2.014	-1.546	-0.979	0	1.012	-0.232	-1.149	1.706	-0.842	-0.826	0.35	-0.196	-2.096	-0.178	-1.118	-1.278	-2.553	-1.076	0.889	0.822	1.433	-0.998	-1.046	-0.835	-0.683	1.433	-1.617	2.187	0.413	-0.207	0.547	-0.87	2.035	0.852	-2.383	-0.182
157278	-0.022	0.532	-0.511	0.635	0.142	-0.088	0.084	-0.063	-0.232	0.033	-0.494	-0.311	0.367	-0.119	0.127	-0.19	0.069	-0.033	0.76	0.316	0.128	-0.28	-0.243	-0.167	0.086	-0.685	-0.465	-0.204	-0.039	-0.302	0.138	0.065	-0.94	-0.858	-0.064	-0.149	0.03	0.436	-0.447	0.723	0.44	0.08	0.166	-0.124	-0.335	-0.96	-0.932	-0.224	0.936
153469	0.283	-1.255	-0.145	0.453	0.147	-0.276	0.82	-0.149	1.917	0.654	-2.752	0.253	0.051	-0.816	-0.544	0.892	0.948	0.035	0.055	-0.347	1.267	-1.098	-0.978	3.911	-0.067	3.447	-1.193	-0.311	1.055	1.361	-0.266	1.143	-1.034	1.125	-0.149	-0.21	0.695	-0.651	-0.217	1.192	1.695	-0.162	-0.998	3.017	-2.589	0.175	-0.871	0.112	0.609
146225	-0.869	-0.916	-1.641	-1.304	-0.147	-0.585	-1.306	-0.867	-2.632	0.117	2.15	-2.181	-1.617	-1.408	-2.417	-0.008	-0.003	-0.669	-1.566	0.597	-1.914	0.41	-1.687	-0.276	0.176	-0.767	0.394	-2.828	-0.003	-0.636	-1.264	-1.416	-0.396	-2.043	-1.702	-0.657	-3.461	-3.071	-0.46	-0.024	-0.926	0.908	1.167	-0.343	-1.679	-2.176	-1.181	0.113	-2.264
9415	0.489	-0.366	-0.313	-0.06	2.395	-0.201	1.308	3.372	2.364	0.126	1.386	0.233	2.721	-0.664	1.276	1.04	4.063	2.63	-0.103	-0.73	1.407	-0.42	0.924	1.567	3.255	1.408	0.063	0.101	0.805	-0.099	2.211	0.764	1.998	1.085	3.641	3.537	2.125	1.631	3.325	0.174	1.889	4.349	1.814	3.334	0.11	1.614	2.343	1.532	2.206
56341	-0.093	-0.204	-0.249	0.724	0.124	-0.518	0.072	-0.225	-0.065	0.385	-0.345	-0.26	-0.438	-0.401	0.244	0.168	0.147	-0.453	-0.445	0.427	0.13	-0.314	-0.044	0.501	-0.166	0.343	-0.196	0.365	0.362	0.746	0.036	-0.416	0.196	-0.191	-0.255	-0.248	0.073	0.08	-0.558	0.163	0.162	0.288	0.358	-0.042	-0.215	-0.294	-0.07	-0.013	0.262
221261	-0.798	-0.318	-0.176	0.188	0.858	-0.07	0.141	1.702	0.135	-1.064	-1.176	-0.199	2.635	1.468	0.75	-0.426	1.666	1.019	1.249	-0.65	0.62	0.557	1.525	-0.312	0.968	-0.079	3.123	0.567	-0.659	0.873	2.818	-0.397	-1.105	-0.661	-0.55	2.329	0.431	0.885	-0.731	-1.659	2.022	1.581	1.859	-0.616	-1.003	-0.001	0.312	-0.307	0.189
6239	1.002	-0.278	0.454	-0.38	0.842	-0.268	0.56	0.178	0.528	0.271	0.176	0.018	0.352	-0.131	0.043	0.163	0.168	0.389	-0.025	-0.083	-0.797	1.215	0.59	0.579	0.141	0.633	-0.905	0.321	0.577	0.812	0.757	-0.485	-0.262	-0.108	0.301	0.729	0.42	1.37	0.06	0.706	0.258	0.226	-0.303	0.236	-0.602	-0.054	0.73	0.184	-0.571
6563	-0.161	-2.48	-1.364	-1.557	-2.338	-0.665	-0.198	-0.963	-1.448	-0.842	-1.477	-0.312	-1.092	-1.738	-1.272	-2.616	-3.228	-2.813	-1.39	-0.011	-0.238	-1.009	-1.304	-0.024	-1.317	-1.23	-1.402	-0.836	-1.248	-1.891	-1.974	-1.85	-1.359	-0.019	-2.93	-1.009	0.018	-2.448	1.475	-0.791	-0.138	-2.96	-2.177	-4.268	-2.177	-1.047	-1.707	-2.044	-2.738
140683	0.101	0.026	0.227	0.3	4.013	-0.375	0.285	-0.31	0.012	0.314	0.181	-0.02	-0.336	-0.032	0.031	-0.058	0.14	0.331	-0.175	-0.258	-0.462	-0.218	-0.035	0.22	2.475	0.493	1.511	0.111	-0.142	0.047	0.159	-0.016	0.306	-0.439	0.557	0.023	0.242	1.015	-0.323	1.77	0.05	0.153	1.098	0.59	-0.341	-0.042	-0.145	1.142	0.13
90317	-0.433	0.652	0.491	-0.412	1.446	-0.148	-0.261	-0.394	-0.022	0.444	-0.395	1.043	0.518	1.354	-0.016	-0.403	-0.614	-0.546	-0.581	0.913	0.358	0.24	-0.172	0.899	1.503	0.201	0.041	-0.33	0.394	0.105	0.116	-1.169	0.712	0.173	2.227	0.239	0.474	-0.252	0.5	0.21	0.204	0.905	0.413	0.101	0.107	-0.169	0.236	0.898	0.65
155435	-0.728	0.375	-0.504	-0.256	-0.906	0.303	0.228	-0.225	0.253	0.694	0.414	0.482	0.638	0.554	-0.464	0.428	0.47	0.748	-1.232	0.001	0.605	-0.433	-0.35	0.255	0.271	0.378	0.923	0.388	0.522	-0.52	-0.133	1.545	0.315	1.186	0.272	0.053	-0.24	-0.391	0.541	-0.508	0.034	0.281	0.792	0.876	-0.335	0.185	-0.247	-0.107	-0.289
100101267	-0.322	1.317	-0.133	-0.553	0.546	0.319	0.942	0.151	0.743	0.257	0.453	-0.126	0.197	0.595	0.319	0.761	0.997	0.566	0.4	0.349	0.351	-0.085	0.325	-0.088	0.696	0.694	0.583	0.162	1.15	0.175	0.95	-0.287	-0.032	0.454	-0.242	0.769	0.17	1.102	0.273	-0.002	0.414	1.47	0.164	0.878	0.355	-0.286	0.049	0.338	-0.216
55289	-0.127	-0.27	0.347	0.331	-0.338	-0.26	-0.511	-0.534	-0.168	0.014	0.29	-0.433	0.062	-0.643	-0.122	-0.045	-0.407	-0.239	-0.185	-0.654	-0.141	-0.041	-0.006	-0.063	-0.103	0.267	0.284	0.164	0.455	0.352	-0.268	-0.318	0.303	1.474	0.363	-0.168	0.093	-0.156	-0.334	-0.031	-0.373	0.544	-0.414	-0.39	-0.105	0.161	0.358	1.101	0.002
26526	-0.095	0	0.147	0.01	0.013	-0.308	-0.222	-0.459	-0.258	0.019	0.022	0.081	-0.542	0.339	-0.539	-0.115	0.154	0.195	-0.221	-0.186	-0.061	-0.105	-0.266	0.101	0.392	-0.193	-0.546	-0.384	-0.068	-0.305	0.034	-0.613	-0.177	-0.397	-0.03	0.224	-0.23	-0.342	-0.141	-0.307	-0.314	-0.095	-0.286	-0.467	-0.755	-0.18	0.146	-0.091	0.283
56124	-0.267	-0.962	-1.288	-0.789	-1.712	0.435	-0.258	1.218	-0.299	-0.956	0.539	-0.277	-0.446	0.581	-0.704	-1.379	-1.173	0.636	0.259	-0.161	-0.524	0.217	-0.36	-1.172	1.783	-0.257	-0.296	-0.93	-0.005	-1.122	-2.334	0.651	-0.774	-1.175	-0.544	-0.051	-1.518	-1.175	0.313	0.633	-2.265	-0.673	1.218	-0.646	-0.37	0.202	-0.793	-0.397	0.136
349149	-0.858	-0.125	-0.831	1.151	-0.384	-1.349	0.118	0.571	0.107	-0.216	-1.71	-0.344	-0.964	-0.378	-0.044	0.178	-0.999	-0.944	-1.455	0.213	-1.091	-1.498	-0.791	-1.133	-1.372	-0.079	-1.333	-0.117	-0.971	-0.442	-1.102	-0.828	0.008	-1.523	0.32	0.28	-0.272	-1.373	0.44	-2.212	-0.363	-1.891	-1.212	-0.978	-0.986	-1.326	-1.709	0.114	-1.128
283149	0.181	0.472	-0.186	-0.046	0.53	0.152	0.488	-0.293	0.557	0.618	1.047	0.457	1	-0.148	0.37	0.368	0.499	0.234	1.09	0.729	0.519	0.563	0.355	0.034	0.962	1.003	1.109	0.502	0.139	-0.071	0.364	0.715	0.781	0.49	1.347	0.809	-0.046	-0.301	0.013	-0.308	0.62	1.53	0.538	-0.409	0.416	0.001	0.276	0.484	-0.004
54145	0.228	-0.532	1.041	-1.148	2.418	-1.262	1.212	-0.071	1.29	1.463	0.393	0.374	0.374	1.764	0.988	1.821	-0.282	0.39	0.028	1.913	-1.049	3.382	0.15	1.314	2.427	2.08	0.365	1.054	2.611	1.526	-0.868	-1.278	0.848	-0.617	1.014	1.559	0.058	-1.826	0.502	0.909	1.423	-0.297	0.123	-0.29	-0.624	0.867	-0.093	0.672	-1.904
10036	0.692	1.505	1.973	0.102	1.464	0.22	1.202	1.056	1.111	0.781	0.41	0.68	0.507	0.08	0.801	2.03	0.945	1.182	1.955	1.164	0.755	0.17	0.536	2.013	1.652	0.986	0.762	0.445	0.912	1.239	0.037	0.822	1.687	0.943	1.14	0.921	0.654	1.645	1.658	1.008	1.981	1.758	1.451	0.904	0.441	0.923	-0.024	0.858	1.314
11146	0.437	1.065	1.235	0.868	0.13	0.143	0.735	-0.135	-0.592	-0.624	0.503	1.149	-0.09	-0.84	1.255	1.368	0.602	1.432	0.813	0.815	1.097	-0.347	0.276	0.412	0.483	0.112	1.406	0.269	-0.559	-0.263	0.035	0.542	0.692	1.211	0.689	0.159	0.406	0.378	0.493	-0.099	0.666	0.489	0.48	1.119	1.035	1.267	0.764	0.809	0.102
347359	0.003	0.065	-0.505	-0.112	0.309	-0.63	0.517	-0.116	-0.134	0.098	-0.179	-0.167	-0.334	0.326	-0.099	0.137	0.554	-0.268	0.006	0.128	-0.915	-0.428	0.228	0.247	0.217	0.157	-0.095	0.092	0.409	-0.071	0.453	-0.405	-0.012	-0.44	0.564	0.344	0.229	-0.026	-0.575	-0.076	-0.003	0.423	0.227	-0.263	-0.062	-0.098	-0.601	0.128	0.136
10752	-2.257	-0.599	-2.228	-1.193	-2.679	-0.078	0.395	-0.425	-1.405	-1.168	0.654	-0.742	0.291	6.267	2.739	0.415	-1.376	-1.106	-1.537	-0.323	0.335	-0.942	-0.339	-1.453	-1.184	-0.609	-0.223	-0.467	-0.433	-0.992	-0.538	-0.748	3.446	-2.039	-2.526	-2.703	4.844	-1.858	0.051	-1.307	1.86	1.034	-1.437	0.499	-1.028	0.329	-1.677	-0.604	-0.858
345462	0.311	1.269	-0.537	-1.24	0.297	0.332	0.525	-0.4	0.999	0.759	-0.744	-1.287	0.574	-0.189	-0.717	-0.697	0.299	0.552	-1.466	0.493	0.99	1.087	0.27	-0.686	0.391	-0.559	0.395	-1.348	1.036	-0.727	0.335	-0.119	-0.731	0.419	-0.82	0.938	0.159	-0.806	-0.118	0.99	0.979	-0.04	0.549	0.021	-0.046	-0.471	0.204	-0.037	0.11
6668	0.258	1.094	0.285	0.67	0.287	0.457	1.316	1.43	0.362	0.225	0.576	0.872	0.25	0.855	0.086	0.353	1.094	0.099	0.874	0.093	-0.241	0.515	0.114	-0.36	-0.463	0.755	0.454	0.579	0.581	-0.305	0.578	0.612	0.137	1.188	0.528	-0.555	0.166	1.597	0.602	1.3	0.106	1.021	-0.271	0.858	0.534	-0.034	0.45	0.375	1.431
55209	-0.178	0.491	0.248	-0.696	0.546	0.556	0.668	1.063	0.769	0.283	0.63	0.362	0.265	0.615	0.205	0.193	1.044	1.21	0.035	-0.282	0.297	0.241	0.295	0.064	0.531	0.457	0.932	0.317	1.148	0.043	0.8	0.659	0.662	0.661	0.813	1.053	-0.634	0.751	0.575	-0.696	0.89	1.474	0.852	1.148	1.152	-0.147	0.279	0.234	0.293
283991	-0.016	0.424	0.427	0.587	-0.194	0.897	0.084	0.555	-0.724	1.494	0.619	0.345	-0.283	-0.005	0.081	0.673	-0.037	-0.463	-0.384	0	-0.303	0.623	-0.123	-0.497	0.558	0.818	0.807	-0.289	-0.014	-0.016	-0.297	-0.281	0.205	0.694	1.139	-0.337	-0.614	-0.305	-0.261	1.362	-0.495	-0.061	0.854	-0.17	0.343	-0.132	1.045	-0.056	0.245
254048	-0.385	0.723	0.279	-0.574	0.08	-0.042	0.249	-0.177	0.668	0.562	0.219	0.874	0.605	0.767	0.755	0.285	0.296	-0.22	-0.037	0.894	0.237	-0.25	0.071	0.327	0.57	0.075	-0.233	0.072	0.722	-0.142	-0.039	0.171	0.776	-0.051	-0.056	0.866	0.233	0.283	0.819	0.632	0.612	1.147	0.158	0.285	0.434	-0.225	-0.032	0.572	0.079
10820	-0.711	1.21	-0.983	0.534	0.364	-0.088	0.529	-0.327	-0.693	-0.56	-0.156	0.058	-0.663	-1.408	-0.372	-0.583	0.265	0.517	-0.873	-0.349	0.366	-1.175	0.043	-1.182	-0.79	0.611	0.078	0.068	-0.77	-0.242	-0.787	-0.44	-0.126	-0.178	-0.136	-0.782	-0.439	-0.973	-1.088	-1.985	-0.611	1.152	-0.206	0.032	-0.099	-0.802	-0.1	0.031	-0.277
9402	0.188	-1.633	-0.305	1.121	-1.486	0.697	-1.491	0.23	-2.345	0.42	-0.047	-2.045	-1.768	-0.597	-0.356	-0.641	-2.765	-0.477	-1.373	-0.543	1	1.312	-1.377	-1.107	0.054	-1.359	0.646	-0.901	-0.489	2.248	-2.776	-1.58	0.128	1.783	1.079	-2.087	-0.53	-2.587	0.773	0.811	-2.228	-1.544	-1.199	-0.506	-1.41	1.068	-0.054	0.516	0.374
53840	0.543	-0.648	-0.486	0.481	-0.659	0.12	-0.134	0.467	-2.232	-1.445	0.287	-0.001	0.389	-0.38	-0.89	-0.968	-0.089	0.213	1.109	-1.179	0.653	-1.441	-0.147	0.501	-0.399	-0.321	0.733	0.19	-1.833	-0.537	-0.384	0.748	0.114	0.495	-2.095	-0.578	-0.248	-0.24	1.253	-0.771	0.326	-0.746	-0.272	0.017	-1.058	0.404	1.106	-1.016	1.006
7225	0.612	0.392	0.882	-0.755	-0.652	2.179	-0.172	0.669	0.387	0.335	1.73	0.577	1.059	1.294	-0.199	0.314	0.515	1.767	1.447	0.468	2.602	0.835	0.992	0.677	0.212	0.284	2.009	-0.227	0.123	0.603	0.234	2.163	1.495	0.843	0.949	1.219	-0.434	0.777	0.711	0.751	-0.104	-0.293	-0.129	1.732	2.919	0.194	1.056	0.454	1.64
10867	-0.345	-1.16	-1.374	-0.005	-0.065	-0.87	0.801	-1.191	0.399	0.129	-0.673	-0.83	0.548	0.373	-0.16	0.522	-0.652	-0.602	-2.126	-0.182	-0.806	-0.808	-0.573	0.123	-0.522	0.47	-0.93	-0.205	-0.023	0.725	-0.04	-0.149	-0.651	-0.384	-0.93	0.367	-0.345	-0.928	-1.986	-1.164	0.749	-1.98	-1.013	0.917	-0.739	-0.64	-0.987	-0.184	-1.44
2495	0.665	0.345	0.954	0.875	0.967	0.684	-0.065	0.215	0.504	0.398	1.132	0.065	0.262	-0.507	0.688	-0.518	0.825	1.158	1.576	1.011	0.439	0.623	0.839	0.424	0.939	-0.197	0.763	-0.446	-0.359	0.457	1.317	-0.953	-0.115	0.199	0.222	-0.555	-0.446	0.485	1.335	0.844	0.348	1.1	1.028	0.597	1.433	0.662	0.836	-0.231	1.228
57226	-0.266	-0.673	0.227	1.43	0.058	0.094	0.061	0.36	0.451	-0.608	-0.169	-0.286	1.073	-0.72	0.347	-0.377	0.487	0.35	0.413	0.315	0.33	-0.111	-0.082	0.686	0.31	0.487	0.44	0.605	-0.618	-0.31	0.632	-0.207	-0.131	-0.438	0.189	0.137	0.885	0.295	0.707	1.471	1.085	0.782	0.207	-0.26	-0.405	0.161	0.465	-0.131	0.731
5204	0.056	-0.382	0.018	-0.552	0.426	0.199	0.03	-0.32	0.236	0.044	-0.567	0.023	-0.198	-0.024	0.192	0.443	0.132	-0.249	0.161	0.08	-0.145	-0.011	0.267	-0.101	0.064	-0.054	-0.24	0.299	-0.036	0.519	0.244	-0.746	-0.294	-0.533	-0.272	-0.221	0.261	0.296	0.161	-0.071	0.52	0.407	0.623	0.036	0.483	0.454	0.158	0.2	-0.023
9597	-0.698	-1.452	-0.25	-0.33	-0.377	0.619	-0.832	0.055	-0.038	0.747	1.026	-1.068	-0.998	-0.362	-0.631	2.265	-0.865	-2.191	-0.582	-0.184	0.747	0.546	-0.841	-0.668	1.115	0.379	-1.264	-0.198	-0.536	0.139	0.044	0.658	1.258	0.106	-0.268	0.177	-0.076	0.322	0.798	-0.03	0.97	-1.176	-0.944	-0.318	-0.597	0.212	-1.146	-0.234	-0.035
389834	0.925	-0.671	2.226	1.651	2.173	0.112	3.264	1.026	1.477	-0.699	2.256	1.152	2.47	1.708	2.294	1.892	4.073	2.801	2.699	0.961	2.341	0.538	1.113	0.998	3.936	0.644	1.068	3.608	-0.117	0.623	0.755	2.982	1.754	2.081	1.495	3.23	2.209	0.412	1.958	2.029	1.721	3.293	2.922	1.694	1.712	2.195	2.864	0.185	1.596
124936	-0.655	-1.102	-0.741	0.261	-0.478	-1.782	-1.494	-0.362	0.006	-0.625	-1.644	0.324	-0.852	-0.497	-0.737	-1.099	-2.432	-1.822	-0.422	-1.496	-1.613	-0.862	-0.546	-0.33	-2.355	-1.232	-2.703	-0.581	-0.751	0.776	-1.67	-0.369	-1.301	-1.962	-1.309	0.275	-0.438	-1.786	-0.519	0.344	-1.48	-4.431	-2.151	-1.219	-0.83	-0.442	-1.851	-1.236	0.129
54072	0.087	0.452	0.628	-0.001	-0.048	1.414	0.265	-0.336	-0.486	-0.301	0.34	0.512	0.594	-0.309	0.864	0.071	-0.258	0.262	-0.201	0.516	0.171	-0.591	-0.194	0.068	-0.221	-0.308	-0.041	0.444	-0.036	0.368	-0.076	0.194	0.873	2.211	-0.101	1.663	0.901	-0.367	0.199	-0.029	0.273	0.088	0.027	-0.104	0.342	1.115	0.327	-0.576	-0.106
494150	0.087	0.254	0.554	0.402	0.337	-0.131	0.231	0.164	0.348	-0.446	-0.127	0.237	0.118	-0.194	-0.281	0.005	0.216	0.245	0.302	0.375	-0.13	-0.013	-0.048	0.15	0.081	-0.082	-0.043	0.422	-0.492	0.106	0.34	-0.021	-0.048	-0.409	0.077	0.518	0.314	0.214	-0.338	0.583	0.024	-0.031	0.624	-0.625	-0.22	-0.813	-0.039	0.069	0.175
8792	0.088	0.356	0.415	-1.033	0.474	0.912	-2.216	0.615	-1.22	-1.062	2.066	-2.687	-1.334	1.457	0.78	0.608	2.233	0.015	0.819	0.981	1.302	-0.326	-0.135	-2.166	0.472	-1.996	0.883	-1.266	-0.911	-0.777	1.539	-0.547	0.786	0.009	-2.474	-2.797	-0.432	-0.623	0.376	-1.814	-0.047	0.771	1.243	-0.677	1.128	0.85	2.677	0.549	-1.171
2200	1.218	-0.734	-0.517	-1.021	-0.87	2.38	-1.285	0.86	-1.263	-0.805	1.502	-0.098	0.932	1.072	-1.387	0.526	-0.246	2.089	1.377	-1.12	1.793	0.224	1.794	-0.841	-1.734	-1.562	-0.601	-3.376	-0.57	-0.716	-0.477	1.398	0.634	2.216	1.537	0.557	-1.218	0.416	2.014	-0.103	-1.388	-0.523	-1.39	0.993	1.714	2.137	-1.457	0.524	1.139
26037	-0.58	1.116	-0.084	0.082	-0.524	-0.465	0.452	0.772	0.267	0.62	-0.341	0.299	0.193	0.618	0.135	0.588	-0.065	0.696	0.212	-0.084	-0.159	-0.814	0.332	-0.098	0.387	0.278	0.155	-0.747	0.675	0.168	0.852	0.328	0.238	0.466	0.613	0.159	-0.221	-0.044	0.363	-1.1	-0.402	0.265	-0.871	0.326	0.401	-0.26	-0.067	0.702	0.966
84100	-0.268	0.325	0.962	-1.148	0.366	0.81	-0.489	0.167	-0.247	0.177	-0.672	1.006	-1.018	-1.018	-1.029	0.891	0.31	-0.293	1.038	0.335	-0.26	0.58	0.511	0.054	-0.568	0.706	-0.15	-0.216	-0.166	-0.072	0.121	-0.284	-0.012	-0.068	0.098	-0.622	0.645	-0.586	0.274	0.695	1.038	-1.348	0.135	0.856	0.583	-0.036	0.302	0.512	-1.118
441027	-0.501	0.382	-0.434	-0.727	-1.091	-1.243	-0.037	-0.551	-1.028	1.414	-0.456	0.326	-0.542	0.364	1.766	-1.644	-0.177	-1.318	-1.548	-1.901	-1.175	-0.675	0.14	-0.365	-2.158	1.071	-0.589	0.913	0.068	0.48	-0.855	0.467	-0.493	-1.145	-0.604	-1.003	0.162	-0.987	0.272	-0.281	-1.271	-1.622	-1.403	-0.833	0.093	0.046	-0.999	0.378	0.062
80177	-0.315	-4.246	-1.347	0.171	-0.886	-1.328	-1.501	-2.552	-3.315	-2.486	-0.285	-1.228	-1.006	-1.688	-1.896	-1.639	-2.63	-0.778	-2.003	0.6	-0.677	-1.098	-0.85	-0.372	-2.579	-1.434	-1.001	-2.367	-1.225	-1.094	-2.031	-0.674	-0.449	-0.878	-3.846	-1.175	-1.192	-2.367	-1.985	-1.068	-2.233	-3.185	-1.701	-1.19	-1.202	-0.884	-2.018	-0.949	-1.485
282969	0.601	-0.743	-0.402	0.118	-0.462	-0.656	-0.047	-0.578	-0.779	-0.915	-1.223	0.068	-0.634	-0.523	0.141	-1.215	-1.252	-2.133	-1.091	-2.806	-0.352	-0.838	0.061	-1.12	-1.431	0.19	-1.382	0.253	0.403	0.24	-0.357	-0.674	-0.511	-2.082	-1.422	-0.055	0.327	-2.244	-1.533	-0.758	-1.645	-1.85	-0.948	-1.21	-1.763	-1.308	-0.629	-0.418	-0.17
137994	0.627	0.188	-0.503	2.006	0.666	0.586	-1.075	-0.367	-0.05	-0.158	0.057	0.463	-0.233	-0.233	1.015	0.154	0.004	-0.048	0.337	-0.038	-0.102	0.473	0.019	-1.12	0.176	-0.487	1.059	0.202	0.481	0.703	-0.662	-0.225	0.29	-0.55	-0.617	-0.906	-0.165	-0.542	-0.024	-1.342	-0.258	1.192	0.835	0.41	0.499	0.042	-0.138	1.323	-0.597
57415	-2.499	-0.477	2.768	-0.691	0.751	1.856	-2.841	-0.692	0.81	-2.29	-0.327	1.783	0.358	-3.137	-1.707	0.696	-0.865	1.285	-1.607	2.027	-0.774	1.811	-2.08	-2.623	-1.463	-2.868	-0.705	-3.599	-3.46	-1.957	1.26	-1.073	-0.317	0.059	0.582	0.732	-0.462	-2.488	-1.812	2.497	0.503	-1.398	0.245	1.918	-0.815	-0.506	-0.364	0.538	-1.58
8517	0.107	1.547	0.225	-0.055	0.634	0.357	0.406	0.202	0.022	0.454	0.459	0.642	-0.138	0.498	-0.355	0.221	1.072	-0.307	0.026	0.655	0.323	0.549	0.31	-0.045	0.618	2.185	0.894	0.294	0.934	1.794	0.253	0.429	-0.312	0.484	0.902	-0.863	0.496	0.146	0.211	0.43	-0.291	0.664	0.677	0.873	1.661	-0.369	0.378	0.777	-0.227
157556	-0.789	-0.685	-0.226	0.027	-0.315	-0.247	-0.299	-0.071	-0.155	-0.031	-0.552	0.261	-0.54	-0.039	-0.244	-0.285	-0.879	-0.704	-0.662	-0.503	-0.492	0.022	-0.16	-0.624	-0.227	0.506	-0.214	0.128	-0.11	0.415	0.026	0.078	-0.042	-0.44	-0.259	-0.246	-0.295	-0.06	-0.018	0.106	-0.516	0.351	-0.129	-0.294	-0.158	-0.305	-0.609	-0.321	-0.168
85019	0.303	0.955	0.614	-0.237	1.189	0.391	1.948	1.416	-0.019	1.692	0.411	-0.16	-0.377	1.648	0.901	0.898	1.52	0.035	0.719	-1.124	0.6	1.613	0.485	1.717	-0.424	0.784	0.285	0.574	0.972	-0.068	1.637	-0.463	0.383	1.03	-0.055	-0.754	0.133	1.65	0.144	1.022	1.212	1.676	1.259	0.901	-0.211	0.113	2.174	1.65	0.208
79469	2.135	0.142	0.37	-0.013	1.184	1.175	1.198	1.548	1.114	-1.019	0.698	1.904	1.614	-0.819	2.399	0.785	1.701	1.637	-0.433	1.367	1.485	1.162	0.076	-0.798	2.491	-1.174	1.649	0.151	-0.294	-0.836	1.585	0.454	0.27	2.288	1.463	1.172	0.713	1.506	3.274	0.967	0.78	-1.835	1.67	0.876	0.593	1.868	1.493	0.726	1.961
84467	0.037	0.34	0.292	0.929	1.071	0.865	0.636	0.042	0.35	0.368	-0.124	0.212	0.647	2.089	-0.272	-0.177	0.609	0.359	-0.548	1.18	-0.517	-0.219	-0.077	0.175	3.703	0.45	0.551	0.279	-0.122	0.302	0.081	-0.03	2.621	-0.269	0.521	2.054	-0.091	0.171	-0.031	0.787	-0.328	1.876	-0.298	0.098	-0.044	-0.357	-0.012	0.576	1.458
10474	-0.249	0.862	0.045	0.433	0.668	0.181	0.527	-0.293	0.752	0.914	-0.385	0.137	-0.023	0.7	-0.141	-0.537	0.501	0.106	0.553	-0.991	-0.241	0.12	0.824	0.006	0.182	1.843	0.35	-0.111	-0.85	0.299	0.21	0.953	0.121	0.336	0.604	0.581	-0.128	-0.288	-0.226	-0.339	0.777	1.562	0.061	1.126	0.099	-0.117	0.927	-0.076	0.568
79170	4.875	-0.56	-3.265	-0.626	-1.2	0.877	1.307	2.744	3.295	3.459	1.381	-1.743	3.697	-1.376	-2.421	-1.906	1.542	-1.259	-1.593	1.588	-2.403	-0.238	0.285	-1.103	1.476	-2.428	0.471	-2.584	-0.123	-3.645	-0.262	-0.612	0.005	-1.102	-1.688	1.72	-2.929	-0.336	-1.591	0.161	2.442	-0.8	-2.141	0.603	-3.107	-1.136	3.334	1.201	5.684
55146	0.04	-0.341	0.006	-0.495	0.098	-0.265	-0.957	-0.972	0.376	0.314	-0.56	0.218	-0.095	0.09	-0.197	0.076	-0.605	-0.195	-0.89	-0.373	-0.215	-0.363	-0.162	0.737	-0.386	0.387	-1.016	0	-0.499	-0.297	-0.033	-0.624	-0.544	-0.436	0.415	-0.421	0.313	-0.079	-0.601	0.4	-0.1	-0.617	-0.393	-0.34	-0.847	-0.345	-0.348	-0.152	-0.068
27010	0.315	-2.152	0.087	-1.086	-1.817	-0.85	-2.292	-1.37	-3.142	-0.137	-0.545	-0.5	-2.398	-0.244	-1.407	-2.168	-1.288	-0.4	0.374	-1.788	0.146	-1.781	-1.607	-1.307	-1.427	-1.387	-0.28	-0.926	-1.2	-0.274	-0.996	-0.682	-0.393	-0.635	-3.519	-1.488	-0.546	-1.636	-0.992	-2.289	-1.465	-2.229	-1.905	-0.947	-1.813	0.145	-0.112	-1.048	-3.136
9844	0.429	-0.053	-0.081	-0.334	-0.973	0.095	-0.304	0.545	-0.166	0.691	-0.14	-0.072	-0.772	0.161	-0.493	1.224	0.45	0.503	0.126	-0.937	0.445	-0.814	0.279	-0.002	1.32	0.259	1.623	1.911	1.303	0.247	0.1	1.218	1.078	0.903	-0.487	-0.802	0.512	0.562	0.037	-0.827	0.507	-0.153	0.345	0.443	-0.17	0.509	0.535	0.221	-0.62
89944	0.651	-0.435	-1.183	-0.017	1.314	2.162	-0.548	-1.227	-0.415	1.086	-0.234	-1.066	0.582	0.265	-1.474	-0.99	-1.123	1.137	-0.701	-1.744	-0.674	0.892	-0.666	-1.52	-0.686	-0.483	-1.764	-0.9	-0.191	-1.136	-0.181	-0.713	-0.086	0.379	0.16	1.27	-1.656	-1.367	-1.811	-1.277	-1.599	1.775	-1.875	-0.082	0.488	-1.532	-0.952	-0.092	-0.617
64081	0.097	-1.478	-0.747	0.283	-2.538	-1.707	-0.906	-0.239	-0.669	-1.178	-1.37	0.251	-0.006	-3.787	-2.598	-2.475	-1.828	-3.397	-0.572	-1.001	-1.138	-1.377	-0.711	-1.299	-2.746	-0.652	-1.196	-0.426	-1.909	-0.452	-1.134	-0.069	-1.739	-3.231	-1.16	0.197	-1.435	-2.98	-1.069	-0.143	0.028	-5.206	-2.974	-1.24	-1.37	-1.636	-2.534	-1.249	-1.457
10483	-0.762	0.743	-0.019	-0.132	0.54	-0.459	0.277	0.342	0.724	0.038	0.382	0.538	-0.254	1.805	0.2	-0.138	-0.395	-0.262	-0.496	1.29	0.639	-0.002	0.232	0.123	0.921	-0.063	-0.123	0.016	-0.279	0.319	0.521	-1.503	0.171	-0.294	-0.091	-0.3	0.8	1.587	1.338	0.622	0.291	-0.456	0.616	-0.12	0.112	-1.105	0.327	0.099	1.136
11214	-0.007	-0.087	0.109	-0.416	-1.01	0.138	0.024	-0.345	-0.688	0.013	0.21	0.396	-0.656	-0.332	-0.096	2.031	-0.39	0.645	-0.148	-0.693	-0.111	0.275	0.253	-0.51	-1.128	-0.652	-0.444	-0.877	0.726	-0.041	-0.112	0.296	-0.572	0.229	0.132	-0.379	-0.485	0.323	-0.44	-0.185	-1.213	-0.682	-0.22	0	0.242	0.411	0.395	-0.433	-0.182
5266	-0.799	0.15	2.88	-0.805	-0.221	2.249	-1.141	0.737	3.731	1.359	3.575	-0.876	0.624	-0.927	-0.38	0.348	2.561	-0.452	0.912	4.363	2.541	-0.064	-0.415	-0.465	3.911	0.707	3.514	-1.549	-1.146	1.415	-0.317	-0.036	2.523	-1.319	3.143	0.847	-1.858	3.599	-0.867	3.631	1.191	0.899	2.421	0.96	-0.6	0.645	-0.238	3.056	1.061
83741	-0.308	0.481	0.049	-0.69	0.233	-0.917	0.412	-0.455	0.005	-0.331	-0.957	-0.079	0.107	-0.58	0.782	-0.213	-0.623	0.039	-0.587	0.393	-0.105	-0.592	-0.004	0.463	-0.08	-1.453	-0.367	-0.092	0.059	0.263	-0.267	0.381	-1.011	-0.509	-0.316	-0.365	0.115	-0.774	-0.299	-0.091	-0.24	-0.931	-0.12	-1.041	-0.616	-0.024	0.322	0.089	0.27
8510	0.016	-0.258	-0.702	-0.53	-1.313	0.357	-0.679	-0.109	-0.189	0.193	-0.395	-0.091	-0.51	-0.156	-0.371	-0.515	-0.671	0.391	-0.589	-0.344	-0.08	-0.484	-0.052	-0.292	-0.055	-0.288	-0.438	-0.754	-0.118	-0.395	-0.61	-0.386	0.059	-0.087	-0.473	0.167	-0.771	-0.363	-0.326	-0.239	-0.971	1.071	-0.868	-0.213	0.375	0.255	-0.138	-0.449	-0.02
3176	0.734	-2.277	-0.445	-0.672	-0.943	-0.697	-0.636	0.132	-1.015	0.062	-0.657	-0.076	-0.152	0.565	1.181	0.105	-2.033	-1.763	-0.389	-0.751	-1.183	0.582	0.45	0.865	-2.153	-0.095	-0.695	0.058	0.312	1.052	0.384	-0.446	-0.426	-2.17	-1.787	0.519	0.4	-0.138	0.235	1	-0.897	-2.633	-1.17	-1.809	-0.905	0.45	-0.851	-1.716	-1.967
339105	-0.138	-0.141	-0.271	0.156	0.117	-0.554	-0.004	-0.638	-0.254	0.444	-0.458	0.183	-0.119	-0.475	-0.104	-0.343	-0.561	-0.305	-0.899	-0.666	-0.395	-0.731	-0.508	0.268	-0.521	1.125	-0.868	-0.32	-0.764	0.128	-0.553	-1.02	-0.738	-0.383	-0.331	-1.208	-0.081	0.655	-0.397	-0.092	-0.105	-0.511	-0.799	0.079	-0.826	-0.63	-0.137	-0.447	-0.225
9794	-0.193	-0.018	0.227	-1.062	0.183	0.545	0.403	-0.125	0.86	-0.183	1.648	-0.463	0.677	1.988	1.195	1.157	1.006	0.524	0.607	1.228	0.933	1.404	0.736	0.688	0.142	2.641	0.098	0.749	1.601	0.461	0.856	0.371	0.796	0.553	1.093	0.789	0.059	0.967	0.63	-0.01	0.822	1.392	1.082	0.67	0.626	0.617	0.461	0.183	-0.205
197320	-1.262	0.283	0.656	-0.806	-0.763	-0.4	0.607	-0.318	-0.031	0.153	-0.935	0.604	-0.693	0.435	0.656	0.254	-0.188	-0.226	0.031	0.652	-0.095	-0.602	0.118	0.443	-0.243	1.196	0.541	-0.471	0.467	0.159	-0.465	-0.438	0.316	-0.56	0.661	0.382	0.098	-0.714	0.608	-1.514	-0.052	-0.304	-0.292	0.184	1.27	-0.422	0.236	-0.055	-0.091
55754	-1.184	-1.494	-0.328	-0.47	0.149	-0.436	-0.925	0.256	-1.325	-1.645	-0.334	-0.834	0.29	-0.591	-0.061	-1.009	-0.243	-0.63	-0.548	-0.097	-0.49	-0.242	-0.094	-0.132	-0.56	-0.887	-0.181	0.171	-0.672	-0.35	-0.617	-0.963	-0.696	-0.516	-0.33	-1.067	0.179	-0.209	0.096	0.648	0.476	-0.478	-0.673	-0.815	-0.244	-0.266	-0.121	-0.984	-1.455
650	1.26	-0.088	-0.276	0.851	1.563	-0.838	-1.428	0.53	-0.188	-2.223	0.117	-0.52	-1.583	-1.418	0.987	1.195	-0.462	2.494	1.193	-0.522	-0.96	0.085	-0.253	-0.474	2.249	-2.009	0.823	-1.139	0.158	-1.719	0.625	-1.099	-1.256	-2.265	-1.261	-0.812	-1.868	0.057	-1.473	-1.279	1.411	0.795	1.055	-0.898	-0.162	0.305	-0.502	-0.614	-0.379
54475	-0.025	1.14	0.627	-0.014	1.601	0.308	0.394	-0.628	-0.255	0.404	-0.037	0.654	-0.116	1.184	1.687	1.382	-0.237	0.616	1.397	0.032	-0.282	1.393	1.564	-0.006	0.473	1.337	1.304	1.018	1.451	0.882	0.438	-1.124	1.365	-0.422	0.096	0.425	0.811	0.424	-0.768	-0.442	-0.584	0.862	1.832	0.067	0.347	-1.118	1.561	0.653	0.372
7084	-0.673	0.259	-0.503	-1.179	-0.692	0.072	-0.415	-1.15	-0.617	-0.203	-0.26	-0.212	-1.091	0.631	-0.253	0.38	-0.372	-0.186	-0.793	-0.635	-0.292	-0.094	0.478	0.145	-0.729	0.893	-0.595	0.203	1.056	1.046	-0.104	0.654	-0.454	-0.369	-0.488	-0.602	0.277	-0.302	-0.288	-1.328	-0.42	-0.677	-1.174	-0.59	-0.425	-0.745	0.389	-0.736	-1.904
5187	1.15	-2.34	-0.805	1.921	-2.533	-1.179	-0.342	-0.433	0.192	-0.959	-0.536	0.164	-0.861	-0.384	-1.321	-0.5	-0.864	-0.471	0.587	-1.762	-1.032	-1.284	-0.722	-0.594	-2.322	-1.213	-1.486	-0.574	-0.253	-0.294	-0.617	0.855	-1.952	-0.799	0.507	-0.189	-0.935	-1.752	0.582	0.521	-1.401	-2.825	-1.71	-0.948	-0.132	-0.151	-1.137	-1.661	-0.868
51311	-0.385	-1.211	-0.804	-0.21	-0.662	0.236	-2.849	0.206	-2.169	-0.918	0.546	-1.708	-1.286	-0.29	0.509	-0.224	-0.929	0.386	-1.345	0.4	1.019	-0.818	-1.298	-0.433	0.246	-0.904	0.783	-1.015	-0.324	-0.919	-1.517	-0.816	0.513	1.105	-1.642	-1.898	0.247	-1.964	0.9	-0.256	-1.693	-0.988	-0.045	-0.587	-0.415	1.266	2.985	-2.828	-0.703
5354	-3.38	-2.347	-4.653	-2.019	-5.354	-1.342	-2.012	-1.903	-3.239	-3.577	0.621	-0.812	-0.399	-1.982	-2.122	-1.847	-2.239	-1.894	-2.119	-3.119	-1.025	-3.468	-1.493	-3.381	-4.071	-3.997	-0.686	-0.724	-0.608	-3.121	-1.808	-2.651	-2.251	-3.743	-4.187	-3.113	-2.518	-3.381	-3.34	-0.592	-2.128	-1.24	-4.216	-1.602	-2.888	-0.544	-5.22	-1.667	-2.244
57127	2.626	3.469	2.999	0.526	0.473	-0.234	0.715	-3.401	2.477	-3.753	-1.073	5.612	3.51	-3.329	1.808	-0.487	-0.001	2.092	-0.138	1.391	-3.402	-3.05	2.372	-1.83	0.561	1.572	-1.156	4.078	4.013	5.407	-2.032	-2.324	-1.239	-1.969	-0.467	2.59	3.671	-1.423	-2.561	-3	0.287	0.167	-2.518	0.049	2.683	-1.744	-1.367	-0.386	3.611
653	-2.101	-3.489	-2.398	-0.119	-2.62	-1.527	-2.048	-2.676	-3.073	-3.415	-0.605	-2.075	-1.384	-3.461	-2.745	-2.836	-3.075	-1.753	-2.947	-2.115	-2.589	-3.068	-1.302	-2.643	-2.353	-3.153	0.908	-3.019	-1.629	-3.882	-2.755	-0.835	-1.901	-3.04	-3.107	-1.753	-3.613	-3.243	-1.88	-1.094	-2.921	-3.081	-3.786	-2.394	-2.966	-2.583	-2.558	-3.046	-1.886
10452	-0.814	0.9	0.105	-0.558	1.383	0.61	0.743	-0.048	0.855	0.755	0.293	-0.121	0.492	0.962	0.661	0.232	1.589	-0.079	-0.066	1.333	0.22	0.801	0.003	0.376	2.772	0.858	0.995	0.633	0.299	0.214	0.475	-0.735	1.139	0.187	-0.354	0.633	0.948	0.429	0.07	-0.583	-0.112	1.556	1.348	0.87	0.574	-0.947	0.272	0.634	0.607
285758	-0.827	0.933	-1.082	1.836	1.118	-1.27	2.692	1.262	0.669	-2.463	-0.439	0.338	2.399	0.268	-0.492	-0.868	1.354	2.984	-0.055	-1.361	1.667	-3.15	1.184	0.726	0.599	0.946	0.645	0.275	-1.257	-0.719	1.407	1.68	0.353	2.102	0.837	1.782	0.645	-2.173	1.398	-1.547	2.747	5.474	2.638	3.045	-0.934	1.853	-0.889	1.142	-0.21
653483	0.059	-0.1	1.048	1.131	0.399	0.159	1.042	0.285	1.479	0.197	-1.167	1.466	1.675	0.46	-1.122	0.915	-0.095	1.537	2.015	1.239	-0.239	0.171	0.663	2.898	1.222	0.516	-0.303	0.005	-1.201	0.922	-0.15	-0.357	0.746	-0.052	0.187	2.471	1.535	1.158	1.561	3.076	1.443	-0.725	-1.075	0.642	0.616	0.774	1.189	-1.213	1.952
400863	0.774	-0.335	-0.339	0.484	0.251	0.613	-0.101	0.683	0.184	0.136	0.549	-0.446	0.457	-0.206	-0.429	-0.819	-0.245	0.539	0.974	-0.487	0.371	-0.213	-0.143	-0.222	0.437	0.332	0.659	-0.26	-0.222	-0.378	-0.573	0.123	-0.154	0.973	0.077	0.564	0.451	0.878	0.539	0.118	0.786	0.009	0.857	-0.018	-0.034	-0.112	0.201	-0.671	0.142
55924	0.978	1.909	1.144	-0.755	0.586	0.138	-0.032	0.587	-0.425	-0.722	1.411	0.255	-0.91	0.443	2.257	0.482	0.452	0.44	1.632	0.433	-0.213	-0.33	0.099	0.517	0.4	0.239	0.97	1.73	0.234	0.717	0.521	-0.245	0.843	0.569	0.648	-0.678	0.415	-0.282	0.632	1.101	1.146	2.246	1.955	-0.259	0.564	1.076	2.454	1.583	0.061
226	0.111	0.793	0.4	-1.058	0.707	1.39	-0.131	0.581	0.307	-0.159	0.778	-0.172	-0.327	0.122	0.069	0.01	1.079	-0.137	1.079	0.581	0.405	0.715	0.415	-0.293	0.217	0.082	0.868	-0.024	0.706	-0.135	0.099	-0.295	0.166	0.522	0.872	0.025	-0.196	0.922	1.075	-0.272	0.457	1.184	0.883	0.237	1.137	-0.043	0.401	-0.304	-0.094
147040	-0.734	-0.116	-0.923	-0.321	-0.878	0.699	-0.481	0.892	0.115	-0.045	0.12	0.467	-0.451	0.33	-0.617	-0.722	0.581	0.283	-0.264	0.32	0.034	-0.65	-0.052	-0.938	-0.455	0.351	-0.351	-0.864	-0.094	-0.03	-0.647	0.125	-1.102	0.17	0.055	0.065	-0.556	-0.895	1.024	-0.547	-1.182	0.013	-0.005	0.237	0.305	-0.247	0.49	-0.604	0.424
89894	0.485	-1.093	0.145	0.693	-0.34	-0.95	1.245	0.571	0.886	-1.03	-0.538	0.399	0.72	-0.614	-0.539	0.282	0.048	-0.762	0.194	-0.689	-0.133	-0.327	-0.249	1.193	-1.209	-0.464	-1.624	0.898	-0.789	0.501	0.263	0.533	-0.787	0.166	0.485	1.163	0.126	0.131	0.658	0.913	0.938	-0.174	-1.3	0.213	-1.331	-0.812	-0.172	-1.066	-0.229
8642	-0.513	-0.468	-0.852	0.124	-0.886	-0.403	-0.746	-0.71	1.603	-0.196	-0.291	-0.577	-0.411	0.218	-0.876	-0.633	-0.67	0.474	-0.87	-0.31	-0.797	-0.72	-0.704	-1.069	-0.521	0.31	-0.076	-0.84	-0.463	-0.46	-0.223	-0.417	-0.325	-0.379	-1.263	-0.525	-0.463	-1.155	-0.975	-0.249	-1.374	-0.16	-0.46	-0.047	0.335	-0.738	-0.887	0.066	0.08
144305	1.32	1.346	1.164	-0.062	-0.343	2.018	1.582	1.925	1.219	-0.786	1.213	0.142	1.083	-0.527	1.871	2.205	2.719	0.708	2.205	0.199	0.749	0.876	1.635	-0.672	1.445	1.159	-0.406	-0.208	1.054	1.246	2.91	0.669	0.066	0.827	3.174	0.397	0.909	2.863	1.594	0.672	1.409	3.533	0.724	0.771	0.957	0.367	1.425	2.553	2.478
116071	0.319	0.041	0.21	-0.162	0.479	0.349	-0.594	0.111	-0.574	-0.291	-0.353	-0.182	-0.763	-0.06	-1.17	-0.146	-0.277	0.119	0.094	-0.352	-0.753	-0.443	-0.608	-0.237	-0.821	0.403	-0.112	-0.384	-0.089	0.239	0.657	-0.128	0.122	1.645	0.655	0.312	0.296	-0.057	-0.721	-0.674	-0.03	2.538	-1.341	-0.244	-0.233	0.091	1.098	-0.557	1.102
84560	-0.092	0.428	-0.426	0.508	0.037	-0.104	-0.376	-0.713	0	0.137	-0.46	-0.092	-0.475	0.704	0.517	0.079	-0.109	-0.852	-0.12	-0.358	-0.63	-0.073	-0.203	-0.182	-0.192	0.17	-0.1	-0.545	-0.344	0.101	0.267	-0.64	-1.026	-0.245	-0.106	-0.481	0.631	0.453	-0.725	-0.117	-0.336	0.034	-0.234	-0.753	-0.152	-0.394	-1.065	0.21	1.156
151126	2.179	0.257	0.1	2.327	-2.463	-2.785	-1.45	-1.168	-0.34	-1.433	-2.095	1.446	-2.977	-0.127	-0.604	0.208	-1.232	-4.233	1.269	-3.418	-1.277	-0.639	0.301	0.471	-0.817	-0.2	-1.892	-0.223	-0.621	0.674	-3.852	-0.242	-0.571	-2.023	0.412	-0.437	0.766	-5.17	-0.11	1.862	-0.442	-3.492	-2.681	-0.022	-6.169	1.273	-4.069	0.307	-4.57
91452	0.762	-0.78	-0.283	0.815	-0.466	0.045	-1.159	0.285	-0.085	-0.022	-0.624	0.681	-0.21	-0.246	-0.433	-0.285	-0.107	-0.798	0.292	-1.181	-0.208	0.071	0.032	-0.307	-1.572	0.045	-0.837	-0.607	-0.459	-0.012	0.013	0.438	-0.737	-0.864	-0.245	-0.573	-0.109	-0.213	-0.104	1.277	0.193	-0.724	-0.6	-0.308	-0.385	0.552	-0.765	-0.478	0.038
2124	-0.146	-1.575	-0.948	-1.354	-1.921	1.007	-2.674	-0.542	-3.267	-1.711	0.927	-3.074	-1.218	-1.247	-0.87	-1.698	-1.144	0.274	-1.157	-0.401	0.617	-1.862	-1.366	-1.265	-1.085	-2.833	0.55	-2.048	-1.229	-1.402	-2.058	-0.47	0.332	1.471	-2.864	-2.199	-0.893	-2.621	-0.068	-1.853	-3.764	-2.582	-0.935	-1.203	-0.656	1.042	1.127	-2.894	-2.049
762	-0.361	-0.182	0.484	-0.141	0.046	-0.34	1.382	-0.042	2.047	1.79	-0.482	0.926	-0.517	3.325	0.253	1.331	-0.352	0.435	-0.2	1.018	-1.017	0.033	-0.137	3.28	-0.123	3.08	-0.073	-0.381	0.773	2.172	0.174	1.912	-0.444	-0.751	-0.038	0.017	2.352	0.67	0.183	0.904	1.495	0.666	-0.135	0.088	1.172	0.059	0.021	-0.282	-0.074
25816	-0.066	-0.628	-0.241	-0.92	-1.457	1.633	-2.525	1.462	-1.619	-0.916	1.307	-1.389	-0.502	1.094	-0.591	0.198	0.33	-0.22	-0.881	-0.948	1.762	-0.216	-0.94	-1.779	-0.386	-1.37	1.098	-0.837	-1.19	-1.773	-0.7	1.99	0.325	2.41	-1.434	-1.671	-0.226	-0.797	-0.444	-3.635	-1.205	0.307	0.571	-0.169	0.549	1.251	0.544	-0.915	-0.534
199692	1.009	-0.498	0.796	0.32	-0.143	-0.352	0.321	-0.231	0.131	0.375	-0.215	0.587	0.615	0.74	-0.143	0.586	-1.156	0.252	-0.245	0.988	0.295	0.265	-0.298	0.558	0.544	0.494	-0.35	0.44	0.387	0.332	-0.298	-0.36	0.647	0.06	0.603	0.486	-0.032	0.072	1.312	0.955	0.252	0.01	-0.023	0.296	-0.173	0.428	-0.237	0.735	0.763
9931	0.182	-0.293	0.125	0.111	0.015	-0.494	-0.096	0.214	0.289	-0.293	0.093	0.327	-0.135	-0.217	0.529	0.439	-0.407	-0.362	0.307	0.179	-0.374	-0.26	0.126	0.21	-0.271	0.021	-0.294	0.014	-0.168	0.041	0.054	-0.309	-0.055	-0.501	0.137	0.264	-0.104	0.471	0.097	0.687	0.592	-0.43	-0.134	-0.74	-0.062	-0.176	-0.46	0.599	-0.482
554202	-0.262	0.096	-0.196	0.417	0.314	-1.329	0.233	-0.839	0.216	0.013	-0.77	-0.221	-0.404	-0.11	-0.109	-0.31	-0.447	-0.38	-0.289	-0.095	-0.742	-0.496	-0.535	0.174	0.399	0.103	-0.368	-0.535	-0.321	-0.352	0.051	-0.68	-0.174	-0.479	-0.332	-0.025	-0.016	-0.296	-0.563	-0.142	0.09	-0.396	-0.442	-0.376	0.099	-0.351	-0.887	-0.113	-0.08
63917	0.355	0.069	0.562	0.724	-0.499	0.131	0.441	0.305	0.478	0.433	0.333	0.538	0.084	0.333	0.142	-0.518	0.956	-0.007	0.398	-0.032	0.029	0.211	0.215	0.833	0.135	0.326	-0.257	-0.218	0.681	-0.105	0.352	-0.146	-0.035	-0.078	-0.218	0.577	0.174	0.115	0.317	0.698	-0.546	0.275	-0.102	0.181	0.247	0.269	0.072	0.222	0.501
51645	-0.054	1.235	1.491	-1.255	2.16	-0.368	0.282	0.99	0.072	0.537	0.613	1.086	0.884	0.513	0.441	-0.276	0.165	0.346	0.346	1.364	0.445	1.205	1.08	1.067	0.901	-0.044	1.102	0.687	2.215	0.597	0.855	-1.329	1.406	-0.768	0.067	0.263	0.916	0.782	0.507	0.307	0.172	0.538	0.928	-0.053	0.14	-1.56	0.303	1.55	0.09
347862	0.223	1.301	-0.283	0.023	0.085	0.259	0.086	-0.801	0.753	0.643	0.486	0.37	0.611	1.717	0.455	0.831	1.169	1.254	0.815	-0.152	0.126	0.074	0.957	1.102	-0.129	2.611	0.996	0.625	-0.232	0.646	0.258	0.436	1.045	0.425	0.61	-0.026	-0.197	0.387	0.613	-0.218	-0.165	1.595	1.094	0.597	1.626	0.092	0.738	-0.032	0.144
130029	0.259	-0.593	0.665	-0.825	-0.79	-0.489	-0.556	-0.201	0.312	0.213	-0.419	0.665	0.406	-0.131	-0.259	0.635	-1.031	0.433	0.256	0.081	-0.04	0.436	-0.254	0.838	-0.296	-0.327	-0.42	-0.235	1.025	0.301	-0.008	0.056	-0.305	-0.187	0.075	0.104	0.043	0.269	0.216	1.303	0.744	-0.281	-0.206	-0.651	0.013	0.411	-0.975	0.629	-0.523
6861	0.382	-0.07	-0.569	0.342	0.392	0.787	-0.551	-0.781	0.279	0.178	-0.552	0.011	-0.14	-0.189	0.41	-0.413	-0.259	-0.142	0.013	-0.183	-0.189	-0.146	-0.042	-0.217	-0.323	0.021	-0.452	-0.037	-0.613	0.238	-0.504	-0.609	0.04	-0.496	0.845	0.086	-0.06	-0.185	-0.701	0.021	0.011	-0.474	-0.099	0.012	0.2	-0.651	-0.085	-0.319	-0.191
9846	0.895	0.751	0.008	-0.454	-0.024	1.11	-0.715	0.115	-0.347	-0.652	0.571	0.077	0.56	0.118	-0.231	-0.382	0.889	0.831	0.817	-0.834	0.245	0.695	0.363	0.128	-0.227	0.38	1.575	-1.027	0.292	0.385	0.575	0.069	0.409	0.266	-0.046	-0.409	-0.041	-0.155	0.231	0.118	-0.377	1.7	1.884	1.254	0.649	0.932	1.404	-0.023	1.544
4499	-4.442	-3.283	-5.626	-1.657	-4.01	-3.959	-2.173	-3.352	-7.901	-5.632	-2.509	-5.286	-3.8	-2.282	-0.269	-5.571	-4.79	-5.234	-7.381	-4.06	-3.354	-5.263	-1.423	-4.907	-3.174	-4.931	-2.437	-2.156	-6.406	-1.916	-4.508	-3.283	-2.704	-5.118	-4.145	-5.579	0.325	-5.582	-1.962	-6.78	-2.589	-5.421	-3.518	-5.915	-6.311	-2.809	-4.296	-4.363	-5.108
29944	-0.089	0.151	-0.614	0.575	3.326	1.15	-0.901	0.02	2.633	0.991	-0.282	-0.255	3.165	0.098	2.584	-0.321	0.206	4.118	-0.292	-0.337	-0.303	-0.578	-0.474	0.147	4.134	1.13	-0.386	-0.085	1.584	-0.311	0.235	0.185	1.038	-0.088	1.479	3.464	-0.324	1.402	-0.22	-0.1	-0.413	0.343	0.291	0.068	-0.396	-0.315	-0.032	-0.347	0.481
80217	2.791	1.137	3.072	0.637	-1.649	-0.255	0.643	-0.303	0.494	1.4	-1.089	1.356	3.305	-0.159	-0.873	0.782	-1.195	-0.522	2.264	0.184	1.459	1.649	0.994	0.911	-2.328	0.052	-0.496	0.58	3.237	-0.927	-0.644	3.448	-0.708	0.73	0.742	0.273	-1.592	0.95	0.718	3.482	0.695	1.032	-0.864	1.378	-2.279	-0.126	1.374	0.279	-0.261
652203	0.373	0.348	0.591	-0.316	0.804	0.418	0.159	-0.037	0.689	0.757	0.466	0.198	0.192	0.238	-0.35	0.025	-0.181	0.179	0.386	0.334	0.336	0.337	0.18	0.118	0.365	0.915	0.133	-0.18	0.245	0.28	-0.521	0.103	0.64	0.683	1.386	-0.008	-0.133	0.308	0.013	0.08	0.331	0.322	-0.123	-0.573	-0.582	0.125	-0.069	0.432	0.784
22823	-0.366	0.288	0.464	-0.422	0.409	0.555	0.96	0.652	-1.279	-1.145	0.815	0.617	0.056	-0.161	0.248	0.941	0.131	0.809	0.038	1.707	0.755	1.249	-0.091	0.439	0.775	0.246	1.879	-0.152	0.598	-0.251	-0.023	0.07	1.461	0.603	0.172	0.711	-0.079	-0.269	0.773	0.972	1.837	0.277	0.337	0.102	0.297	1.117	-0.12	0.554	-0.644
7310	0.038	0.1	-0.383	-0.129	-0.717	0.353	-0.34	-0.841	-0.341	0.159	-0.024	0.143	-0.238	0.901	-0.216	0.53	0.296	-0.3	-0.849	-0.51	0.453	-0.591	0.009	0.414	-0.272	0.063	0.47	-0.093	0.921	-0.251	-0.309	0.802	0.211	0.638	0.263	0.073	0.132	0.178	0.684	-1.341	0.32	0.744	0.457	0.318	0.949	0.429	0.21	0.06	0.085
54965	-0.015	0.924	0.515	0.966	0.54	0.094	0.219	-0.345	1.837	1.022	0.357	0.664	-0.084	-0.055	-0.678	0.58	0.287	0.67	0.871	0.177	0.076	-0.271	-0.059	0.125	0.486	0.748	-0.496	-0.191	-0.1	-0.291	0.785	0.399	-0.349	0.721	1.294	0.23	0.077	1.168	0.861	0.709	0.753	1.155	-0.452	-0.042	0.57	0.215	0.096	-0.005	1.056
6358	-0.745	-3.223	-2.347	-0.444	-2.316	-1.174	-1.458	-2.21	-1.508	-1.222	-0.791	-0.838	-1.054	-0.487	-2.545	-2.014	-2.751	-1.19	-3.359	-0.472	-0.673	-2.068	-0.752	-0.584	-1.873	-0.832	-1.373	-2.112	-1.08	-0.833	-1.587	-0.832	-1.083	-1.686	-2.205	-1.992	-1.322	-2.686	-1.14	-0.297	-1.884	-4.419	-2.977	-0.077	-0.859	-1.092	-1.762	-1.361	-1.999
642765	-0.209	0.416	0.217	0.108	0.264	-0.29	-0.544	0.022	0.515	-0.01	-0.309	-0.092	-0.661	0.252	0.323	0.145	0.002	0.34	0.34	0.229	-0.349	-0.024	-0.249	0.075	0.35	0.471	-0.208	0.541	-0.616	0.072	0.563	-0.373	-0.349	-0.098	-0.128	-0.127	0.229	-0.141	0.179	0.355	-0.024	0.242	0.12	-0.631	-0.133	-0.108	0.037	-0.141	0.026
221016	1.178	0.756	0.415	0.074	-1.058	1.237	0.001	0.289	0.58	0.938	0.74	0.013	0.473	-0.916	0.472	-0.753	0	0.175	0.105	-1.093	0.196	0.065	0.236	1.198	-0.814	0.159	-0.325	-0.796	0.786	0.136	-0.374	1.069	0.138	0.862	0.994	1.062	-0.805	0.204	0.524	1.22	-0.195	1.061	0.112	2.217	-0.168	0.301	-0.496	1.595	1.259
10565	-0.019	0.638	1.224	-0.703	1.592	0.526	-1.034	0.511	-0.33	0.106	0.53	0.235	0.036	0.525	1.921	1.405	0.903	0.276	-0.455	-0.745	0.488	2.087	1.209	-0.293	0.381	-0.221	1.319	0.241	1.094	1.037	0.301	0.978	0.794	0.155	0.321	0.73	0.006	1.068	0.038	-0.22	-0.127	0.777	1.078	0.025	0.654	0.822	0.978	0.705	0.171
57649	-0.761	1.266	-0.232	-0.128	-0.303	0.763	0.939	0.401	0.669	0.907	0.426	0.6	0.447	1.392	-0.462	0.556	1.087	0.323	0.558	-0.503	0.147	0.537	0.323	0.4	0.258	0.835	0.531	0.584	0.828	-0.109	0.33	0.309	0.321	1.106	0.817	0.135	0.122	1.451	-0.013	-0.313	0.369	1.461	0.237	1.417	0.475	-0.386	0.756	0.948	0.719
11040	-0.954	0.11	-1.514	-2.221	-0.733	1.609	-1.808	1.159	-0.215	0.177	1.365	-1.399	-0.479	-0.893	0.635	-0.207	-0.494	-0.22	-1.205	-0.251	1.115	-0.675	-1.217	-1.248	-0.807	-1.059	0.33	-0.913	0.307	-1.844	-0.935	-0.028	0.198	3.01	-1.37	-1.104	-0.483	-0.115	-0.835	-0.735	-0.851	-0.689	-0.373	-0.387	0.312	0.777	0.362	-2.292	-0.854
5902	-0.369	-0.501	0.537	-0.287	1.584	-0.089	0.818	-0.162	0.279	0.546	0.363	-0.208	0.092	-0.081	0.65	1.222	0.63	-0.298	-0.55	0.961	0.238	0.652	0.003	1.371	1.743	0.206	0.808	0.625	0.87	0.358	0.597	-0.994	1.867	-0.244	0.009	0.999	0.469	-0.228	-1.03	-0.043	-0.436	-0.111	1.062	-0.337	-0.839	-0.457	-0.187	0.587	0.045
25802	-0.064	-0.91	-1.341	-0.536	-2.904	1.558	-1.291	-0.927	-0.804	0.169	1.229	0.159	-0.448	0.541	0.453	-1.72	-0.74	0.603	0.269	-1.075	-0.215	-0.668	0.883	-1.422	-2.663	-0.911	-0.151	2.248	-0.084	2.726	-1.14	1.234	-0.687	0.12	-1.13	-0.22	1.054	-0.45	-0.831	-1.952	-2.493	-0.6	-0.924	1.605	0.932	1.12	-0.765	-0.982	0.295
10942	0.105	-0.599	0.035	0.402	-1.784	0.179	-0.577	0.406	-0.093	-0.129	-0.258	-1.242	2.682	-0.803	-0.253	0.05	-0.41	0.106	-0.881	0.259	-0.337	-0.326	-0.644	-0.341	-0.474	-0.049	2.489	0.003	-1.057	-0.146	-0.286	-0.769	0.276	1.418	-0.84	-0.695	-1.267	0.183	-0.123	-0.024	-0.505	0.398	-0.603	-0.22	0.121	-0.64	-0.674	-0.479	-0.516
201164	1.968	-0.374	0.375	1.635	-0.232	-0.297	-0.237	0.212	0.288	-1.536	-0.052	0.934	-2.564	-1.294	0.851	0.106	0.225	1.264	2.097	-0.576	-0.251	0.411	0.116	-0.533	-0.223	-0.429	-0.85	-0.158	1.455	0.219	-0.047	0.105	-0.18	-0.486	1.488	0.578	0.723	-0.731	0.904	1.904	1.21	-0.226	0.559	-0.866	-0.602	1.071	0.007	0.601	-0.426
218	1.252	5.23	4.353	-1.004	-0.389	0.64	-1.134	0.727	1.148	0.199	-0.087	3.249	-0.314	-0.258	0.268	-1.056	-0.358	-0.739	2.512	-1.218	-1.531	-0.489	5.22	-0.51	0.356	3.701	-0.486	7.036	2.954	6.336	-1.945	-1.363	-1.212	-0.507	0.532	0.804	4.152	0.128	-0.642	-0.204	-0.833	1.954	-2.333	-0.459	3.884	0.907	3.941	0.822	-0.411
646654	0.21	0.284	-0.08	-0.499	0.218	-0.165	-0.146	-0.274	-0.062	0.032	-0.577	-0.003	0.123	-0.371	-0.058	-0.302	0.044	0.126	0.464	-0.035	-0.811	-0.283	-0.143	0.262	0.444	0.152	-0.137	0.093	-0.397	0.165	0.306	-0.709	-0.526	-0.348	0.137	-0.248	-0.103	0.337	-0.105	0.336	-0.166	0.038	0.357	-0.443	-0.638	-0.015	-0.878	-0.038	0.404
26	-1.123	-0.331	-0.155	-0.347	-0.37	-0.17	3.312	3.069	0.01	-0.238	-2.041	-1.863	0.319	-0.013	0.011	-0.029	-0.493	0.474	0.152	-0.41	0.649	-0.708	-1.674	0.191	0.111	0.222	0.17	-0.956	0.145	0.022	0.366	0.009	0.451	0.031	-0.413	-0.064	-0.358	-0.468	0.041	-2.72	0.294	0.266	0.009	0.187	-0.492	0.054	5.939	0.326	-0.006
1238	-0.988	0.235	-0.157	-1.103	-1.183	-0.871	-0.109	0.913	0.597	-0.177	-1.17	0.864	0.571	0.869	0.335	-0.384	-1.552	-1.153	-2.182	0.499	-0.79	-0.826	0.054	0.124	-1.699	1.165	-3.288	0.89	0.903	1.76	-0.49	0.29	-1.75	-0.618	-1.365	-1.023	0.27	0.147	-1.163	0.849	0.066	-2.271	-4.474	0.602	-1.597	-0.757	-1.445	-0.326	-0.348
51252	-0.202	-0.305	-0.657	0.198	-0.012	0.016	0.173	-0.347	0.137	-0.061	-0.131	-0.046	-0.361	0.236	0.268	0.067	1.437	0.006	0.082	-0.399	-0.398	-0.139	0.001	-0.103	0.294	0.146	0.447	-0.049	-0.349	-0.034	0.141	-0.188	-0.523	0.009	-0.025	-0.277	1.489	-0.068	-0.025	0.311	0.37	0.319	0.026	-0.19	-0.067	0.509	1.702	-0.176	-0.055
4853	-0.933	-0.549	-0.943	-0.403	-0.665	0.228	0.317	0.558	0.072	-0.457	0.694	-0.155	0.17	0.793	-0.678	0.42	0.476	-0.466	0.424	0.895	0.448	0.392	0.151	-0.04	-0.61	-0.175	-0.163	-0.435	-0.019	-0.803	0.076	0.555	-0.23	0.658	0.093	0.361	-0.685	0.244	0.364	-0.016	0.934	0.104	0.193	0.081	0.155	0.198	0.841	0.479	-1.018
84108	0.057	0.104	0.116	1.177	-0.035	-1.152	-0.515	0.371	0.224	0.148	-0.319	0.426	0.433	0.039	-0.052	0.985	-0.249	0.09	-0.68	0.95	0.206	0.226	0.658	-0.737	-0.238	-0.254	-0.168	-0.056	0.046	-0.402	0.136	0.524	0.603	-0.505	0.466	-0.019	0.762	-0.706	0.878	-0.402	-0.143	-0.545	0.079	-0.931	-0.004	-0.552	-0.534	0.882	0.663
145483	-0.253	0.784	0.991	0.462	-0.523	0.227	0.374	0.48	1.07	1.215	0.635	1.311	-0.142	0.669	-0.248	-0.217	0.416	0.51	1.103	0.632	-0.469	0.602	0.53	1.66	0.407	0.186	-0.286	-0.672	0.227	0.726	0.324	0.394	0.418	-0.59	0.867	0.897	-0.265	0.289	1.576	0.729	0.223	0.042	-0.441	0.831	0.776	0.153	0.301	0.901	0.64
29108	0.085	0.159	-0.832	-0.237	-0.943	1.021	-1.048	1.333	-1.431	-0.285	0.957	-2.189	-0.535	-0.926	0.159	0.194	0.704	-0.167	1.075	-0.759	1.187	-0.613	-0.758	0.285	0.311	-1.499	0.572	1.106	-1.451	-1.041	-0.906	0.208	0.21	1.137	0.505	-0.568	-0.171	0.747	-0.206	-1.766	-2.498	-1.155	-0.39	-0.207	-0.215	-0.614	3.067	-0.361	2.281
2857	1.069	0.98	0.135	0.928	-0.768	0.777	-1.812	0.684	-2.186	0.532	0.715	-1.378	-0.172	2.112	-1.382	0.135	0.403	0.628	0.368	0.057	0.983	0.472	0.57	0.173	0.001	-1.895	1.34	-0.661	-1.022	-1.312	-0.522	0.481	0.57	1.141	-1.515	-1.488	-0.06	-0.711	1.716	2.481	-4.423	-2.67	0.289	-1.29	1.327	0.809	5.133	-1.685	0.768
63910	0.287	0.687	-0.451	0.231	1.266	0.338	0.359	-1.291	-0.775	1.591	-0.193	0.37	-0.191	0.101	-1.343	-2.4	-0.202	-0.025	-0.442	0.527	0.565	0.63	-1.261	-0.164	0.867	-0.129	0.237	-1.985	0.008	-0.358	-0.562	-0.668	0.404	0.456	-0.518	-1.151	-0.092	0.753	0.067	-0.274	-1.389	0.774	1.315	0.483	-1.451	-0.377	0.167	0.225	0.827
283483	-0.162	-0.338	-0.015	0.621	0.387	-0.655	0.05	-0.852	0.047	-0.466	-0.614	0.057	-0.532	-0.004	0.179	-0.072	-0.422	-0.15	-0.155	0.109	-0.37	-0.321	-0.062	-0.139	-0.574	-0.581	-0.584	-0.025	-0.25	0.146	-0.261	3.591	-0.543	-0.584	0.022	-0.107	0.373	0.11	-0.192	0.053	0.134	-1.063	-0.369	-0.293	-0.196	-0.514	-0.626	-0.128	0.228
5788	-0.124	-1.326	-1.066	-1.695	-1.599	1.087	-2.592	-0.1	-3.114	-1.743	1.223	-2.631	-0.776	-1.657	-0.661	-1.159	-1.811	0.115	-1.421	-0.685	1.015	-1.922	-1.25	-1.341	-0.7	-2.656	0.584	-1.839	-0.732	-1.314	-2.871	-0.442	0.567	1.722	-3.351	-2.262	-0.394	-2.174	0.364	-2.511	-2.929	-1.463	-0.645	-0.669	0.037	1.054	0.255	-2.622	-1.613
6210	0.421	-0.482	0.542	-0.696	0.692	-0.371	-0.055	-0.336	-0.548	-0.071	-0.254	-0.097	1.126	-0.077	1.877	0.938	-2.282	0.828	0.807	1.035	-0.28	-0.621	0.144	-0.078	1.201	0.05	0.467	-0.275	0.916	-0.234	-0.306	-1.229	0.307	-0.455	0.981	0.951	-0.188	0.299	-0.326	0.142	-0.609	-1.639	-0.085	-0.687	-0.033	-0.761	0.43	0.139	0.295
221504	1.06	1.731	1.636	-0.559	1.395	0.946	1.718	0.831	1.665	0.582	1.244	1.071	1.009	1.685	1.022	1.053	1.271	0.63	1.267	1.543	0.554	2.057	1.433	0.963	0.903	1.594	0.998	0.545	1.845	0.601	1.414	-0.982	1.237	0.231	1.153	0.474	0.569	2.037	0.738	0.882	0.637	2.164	1.559	0.678	1.135	-0.174	1.675	1.792	1.077
930	0.008	-0.046	-0.739	0.411	-1.442	1.057	-0.531	-0.007	-0.456	-0.172	1.394	-0.211	1.091	-0.281	-0.067	-0.625	-0.059	0.512	-0.606	-0.412	0.5	-0.402	-0.677	-0.097	-0.652	0.132	-0.208	-0.789	-0.365	-0.262	-0.206	-0.458	0.497	2.052	1.95	-0.499	-0.369	0.788	-0.499	-0.208	0.79	0.4	0.078	-0.782	-0.059	1.069	-0.204	-0.534	-0.066
124975	-0.764	-2.009	-2.771	-2.239	-2.96	0.701	-2.241	-1.609	-2.226	-0.98	-0.354	-1.468	-1.711	-1.702	-4.02	-2.775	1.309	-1.772	4.206	-3.289	-2.593	-3.081	-0.961	-1.567	-2.749	-1.965	-2.096	-5.013	-2.844	-2.446	-2.798	-1.281	-2.795	-2.073	-1.752	-3.129	-4.374	-3.222	-1.81	-1.751	-3.059	-0.886	-2.864	-3.177	-2.065	-1.476	-0.224	-0.889	1.353
10408	0.458	-0.43	0.282	0.741	1.258	-0.091	-0.426	-0.659	0.514	0.946	-1.133	-0.983	0.528	0.181	0.428	1.585	-0.03	-0.076	-0.514	-0.669	-0.177	0.171	0.131	0.179	2.466	0.662	-0.068	1.176	0.775	0.836	1.162	0.08	1.245	-0.569	0.252	0.756	0.123	-0.316	-0.45	0.033	-0.222	1.538	1.633	1.843	0.177	0.864	0.666	0.684	-0.389
649839	0.087	0.533	0.022	-0.365	0.504	-0.439	-0.587	-0.363	0.22	-0.33	-0.367	0.546	-0.053	-0.097	0.815	0.261	0.13	0.407	0.03	0.096	0.036	0.038	-0.566	0.329	0.567	-1.06	0.566	-0.517	0.315	-0.124	0.296	-0.128	-0.151	0.12	-0.054	0.292	0.546	-0.34	0.215	0.446	-0.601	-0.788	0.354	-1.168	0.151	-0.648	0.357	-0.21	0.44
2157	-0.982	-3.52	-1.302	0.246	-1.911	-1.733	-0.623	-0.471	-1.584	-1.531	-0.727	-1.083	-2.216	-1.576	-1.417	-0.306	-2.809	-1.698	-0.584	-1.592	-1.498	-1.495	-0.964	-0.718	-1.757	0.061	-2.843	-0.762	-1.256	-0.168	-0.995	-0.12	-1.418	-1.462	-1.045	-1.448	-0.454	-1	-0.836	0.133	-0.893	-5.385	-3.731	-0.464	-1.453	-1.145	-1.812	-1.329	-2.461
6529	0.219	-2.542	0.104	0.631	-3.526	-0.791	5.065	0.313	0.549	0.411	-0.792	0.387	-0.085	-0.345	-0.141	-6.658	0.175	-2.281	-0.142	-0.637	-0.767	-0.09	0.043	0.613	-0.396	0.439	-4.863	-0.338	-0.242	0.401	0.319	0.325	-0.928	-1.017	0.157	-0.132	0.574	0.454	0.336	1.097	1.422	-0.698	-2	0.301	-1.543	1.492	-0.38	-0.425	0.214
8341	0.196	0.201	0.723	0.178	0.758	-0.574	0.616	0.18	0.513	-0.033	-0.242	0.848	-0.302	0.284	0.535	0.108	0.448	0.431	0.529	0.37	-0.129	0.515	0.748	-0.088	0.313	0.502	-0.001	0.133	0.811	0.359	-0.48	-0.62	-0.147	-0.036	0.245	0.011	0.3	0.121	0.052	0.474	-0.011	1.153	-0.056	-0.124	-0.245	-0.281	-0.504	-0.147	0.075
51130	0.257	-0.114	-0.014	0.7	0.3	-0.024	-0.294	0.116	0.09	-0.178	-0.108	1.242	0.241	1.234	0.002	-0.403	-0.329	-0.081	-0.221	-0.417	1.049	-0.172	-0.128	0.548	0.209	-0.242	0.373	0.219	-0.286	-0.686	0.188	0.085	0.292	0.458	0.272	-0.105	0.329	-0.469	1.148	0.534	-0.01	0.233	0.261	0.531	-0.182	-0.139	0.098	-0.104	0.883
10755	0.748	1.786	-0.053	0.385	-0.448	0.764	0.103	0.025	1.513	1.001	0.395	-0.505	0.154	0.771	-0.032	0.503	1.682	0.517	-0.232	0.669	0.296	0.405	-0.49	0.442	0.673	0.624	-0.184	0.244	0.434	0.339	0.558	0.559	0.362	0.151	0.921	1.026	0.066	0.587	-0.293	-0.011	0.17	2.1	0.807	1.125	1.27	0.453	0.546	1.822	2.077
60312	0.234	0.574	-0.384	-0.273	0.062	0.696	-0.382	-0.303	0.06	0.06	0.039	-0.06	0.758	-0.186	-0.025	0.012	-0.055	0.108	2.15	-0.058	0.125	0.555	-0.483	-0.59	0.126	-0.549	0.161	-0.456	0.028	0.123	0.277	-0.549	-0.19	-0.093	0.225	0.348	0.019	0.581	-0.538	-0.102	-0.558	0.458	0.279	-0.198	0.126	-0.384	-0.221	0.151	0.622
23461	0.126	-0.247	0.688	-0.639	0.675	-0.358	-0.088	-0.215	-0.187	0.172	0.003	0.444	-0.221	0.691	0.474	0.174	-0.284	-0.801	-0.387	-0.772	-0.051	-0.577	0.175	1.022	-1.118	-0.129	-0.846	0.306	0.221	-0.57	0.616	1.033	-0.463	-0.441	0.947	0.702	0.065	0.587	1.285	1.104	0.509	0.355	0.057	0.268	-0.139	0.781	-0.69	1.059	-0.792
646626	-0.382	-0.498	-1.439	-0.201	-0.799	-0.091	1.613	0.731	-0.753	-0.012	0.501	-0.077	-0.609	0.448	-0.651	0.47	0.183	0.773	0.221	1.077	2.177	-0.915	0.211	1.164	-0.418	-0.444	0.727	-0.498	1.179	-0.626	-1.034	1.164	-0.305	1.366	1.174	0.569	-0.767	0.14	-0.028	-0.424	-0.436	0.38	-0.04	0.415	-0.782	1.511	0.622	0.322	-0.256
353497	0.15	-0.758	0.105	-0.265	0.012	-0.758	-0.351	-0.703	-0.286	-0.05	-0.846	-0.121	-0.076	-0.466	0.023	-0.466	-0.705	-0.364	0.181	-0.123	-0.451	-0.348	-0.15	0.204	-0.402	-0.203	0.124	2.174	-0.514	3.021	-0.301	-0.669	0.102	-0.573	-0.086	-0.312	0.662	-0.055	0.035	-0.2	0.335	-0.704	-0.299	-0.149	-0.288	-0.348	-0.112	-0.576	-0.08
84214	-0.208	0.267	0.3	0.342	0.105	-0.074	0.336	0.579	-0.432	0.76	-0.147	0.834	0.898	0.336	0.587	-0.144	-0.089	0.06	0.111	-0.265	0.033	0.413	-0.202	0.609	-0.348	0.33	1.049	0.376	-0.053	0.283	0.339	-0.305	-0.669	-0.146	0.315	0.669	0.517	0.184	0.052	0.366	-0.07	0.069	0.194	-0.523	-0.054	0.105	-0.344	-0.047	0.424
399	-0.543	-2.002	-1.509	-0.6	-0.96	1.432	-2.747	0.098	-2.498	-1.658	0.917	-2.654	-0.417	-1.311	-0.69	-1.644	0.004	-0.217	-1.311	-0.434	1.503	-2.684	-1.163	-1.268	-0.384	-2.879	0.795	-1.8	-0.449	-1.66	-3.536	0.004	0.763	2.835	-1.806	-1.424	-1.326	-2.075	0.393	-1.898	-2.173	-1.189	0.004	-0.661	0.757	1.167	0.068	-2.937	-1.403
7566	0.004	0.507	-0.316	0.717	-0.25	-0.382	-0.194	-0.139	-0.208	-0.537	-1.078	0.049	-0.966	-0.262	-0.804	0.07	-0.22	0.151	0.139	-0.589	0.015	-0.744	-1.023	-0.349	-1.342	-0.602	-0.746	-0.788	0.096	0.881	-1.304	1.004	-0.388	0.593	1.205	0.275	0.399	-0.567	0.314	-0.055	-0.552	-0.029	-0.592	0.322	-0.071	-0.101	-0.015	-0.311	0.439
126789	-0.257	0.718	-0.052	0.87	0.49	0.273	-0.54	0.072	-0.334	0.179	0.379	-0.098	-0.53	0.08	0.322	-0.127	1.39	-0.549	0.626	-0.91	-0.36	0.365	-0.056	-0.355	0.532	0.734	1.366	0.178	-0.359	0.417	0.699	-0.645	1.265	-0.514	-0.259	0.129	-0.165	-0.715	-0.162	-0.42	-0.588	0.982	1.008	-0.478	1.129	-0.518	1.313	0.958	0.278
645345	-0.014	-0.573	0.028	0.575	0.319	-0.35	0.313	-0.339	0.459	0.251	-0.448	0.409	-0.359	0.598	0.085	0.172	0.164	0.039	-0.171	-0.361	-0.594	0.046	-0.778	-0.223	-0.313	0.14	-0.461	-0.207	-0.018	0.221	0.143	-0.77	-0.815	-0.565	-0.156	0.605	0.517	0.223	0.254	0.382	0.325	-0.24	-0.315	-0.424	-0.168	-0.164	-0.238	-0.065	0.808
646981	0	0.056	0.198	0.115	-0.192	-0.472	-0.108	-0.601	-0.431	-0.109	-0.537	-0.156	-0.092	0.106	0.13	0.09	0.026	-0.031	0.153	0.138	-0.737	0.005	0.035	-0.111	0.101	-0.958	0.292	-0.14	-0.362	0.149	0.094	-0.412	-0.389	-0.791	0.016	0.217	0.446	0.464	-0.057	0.641	0.073	-1.072	-0.017	-0.147	0.18	-0.643	0.121	-0.164	-0.213
23438	0.296	0.109	0.557	0.117	-0.283	0.668	0.401	0.598	0.823	-0.38	0.408	0.758	0.372	0.911	0.373	0.595	1.349	-0.272	1.001	0.072	0.54	0.065	0.895	0.185	0.6	0.191	-0.22	0.488	0.622	0.516	0.502	0.099	0.595	-0.041	0.703	0.309	0.854	0.657	0.587	0.457	-0.03	0.136	0.526	0.426	0.775	-0.077	0.494	-0.474	0.209
160824	0.034	0.061	0.562	-0.506	0.036	-0.596	0.009	-0.736	0.288	0.317	-0.093	-0.133	-0.162	-0.452	0.694	-0.232	-0.074	0.067	0.268	-0.008	-0.247	0.104	0.072	0.126	-0.097	0.07	2.168	-0.274	0.603	0.136	0.357	-0.567	-0.469	0.157	0.261	0.117	0.318	-0.069	-0.14	-0.312	-0.109	0.019	0.946	-0.398	0.062	-0.341	-0.469	-0.246	-0.029
79701	0.179	0.442	-0.424	0.101	0.043	-0.161	-0.291	0.28	-0.59	-0.376	-0.523	-0.482	-0.64	0.538	0.282	-1.234	0.533	-0.75	0.351	-1.116	-0.304	-0.658	0.363	-0.563	-0.676	0.039	0.084	0.927	-0.531	0.153	0.106	0.293	0.184	-0.405	0.216	-0.039	0.568	-1.942	0.388	-0.622	0.039	0.38	0.73	0.143	-0.015	0.294	-0.546	0.336	0.035
645206	-0.356	-1.166	0.079	0.37	-1.466	-0.32	-2.383	-1.39	-1.167	-1.03	0.49	-1.505	-0.054	0.311	-1.265	-0.984	-0.865	-0.735	0.685	-1.465	-1.923	-0.891	-0.559	-0.335	3.458	-0.869	1.655	-1.604	-0.594	-1.445	-0.886	-1.519	2.247	-1.827	-1.295	-0.049	-0.38	-0.62	-1.879	-2.561	-2.243	-0.816	-0.632	0.029	0.71	-0.583	0.318	-0.532	-0.463
3846	-0.314	0.057	-0.366	-1.131	0.168	-0.508	0.474	-0.248	0.051	0.207	-0.047	0.257	-0.102	-0.258	0.078	-0.052	-0.183	0.04	0.055	0.251	-0.125	-0.028	-0.276	0.141	-0.026	0.144	-0.153	-0.446	0.493	0.113	-0.052	-0.604	-0.182	0.218	-0.153	0.025	-0.177	0.15	-0.008	0.638	-0.071	0.329	-0.113	-0.216	-0.358	-0.014	0.125	-0.195	-0.287
23248	0.301	0.765	0.927	0.168	0.091	0.448	1.151	0.376	0.768	0.701	0.919	0.673	0.915	0.856	-0.167	1.1	0.498	-0.143	1.201	0.76	0.205	1.105	0.86	0.702	0.714	0.78	-0.467	0.289	1.814	0.513	1.207	-0.077	0.429	0.364	1.329	0.682	-0.252	1.551	0.103	0.373	1.434	1.335	-0.068	1.251	1.008	0.334	-0.096	1.427	1.003
2042	0.918	-3.676	-1.592	-2.877	-1.403	2.069	-3.72	-1.197	-3.384	-4.103	1.284	-2.828	0.132	-1.469	-4.886	-2.889	-1.39	1.508	-0.846	-3.846	-0.789	-0.716	-0.561	-2.501	-4.195	-5.151	-1.98	-4.805	-1.44	-2.79	-1.472	0.36	-0.938	0.202	-3.745	0.018	-4.428	-3.577	-2.955	-2.048	-5.049	-5.1	-2.92	-1.369	0.337	0.379	-2.513	-3.13	-0.501
4023	2.273	2.153	1.921	-0.084	0.983	1.926	3.854	2.947	1.994	1.786	2.047	-0.098	1.404	3.003	-0.255	2.713	1.871	3.453	2.932	1.856	2.148	2.684	1.768	1.871	2.097	2.44	4.068	-0.329	4.304	1.366	2.03	3.639	1.859	2.37	0.125	1.458	2.642	3.22	0.589	3.925	-0.204	1.627	2.998	3.419	4.645	4.553	3.798	2.483	1.717
55216	-0.249	-0.429	0.403	-0.798	0.664	-0.117	0.262	0.448	0.054	0.32	-0.015	0.503	0.241	0.075	0.339	0.732	-0.037	-0.085	0.333	-0.083	0.441	0.951	1.179	0.51	0.457	-0.031	-0.005	0.341	0.502	0.265	0.448	-0.447	0.624	-0.094	0.245	1.043	0.231	-0.281	0.685	0.113	0.407	-0.334	0.134	-0.587	-0.125	0.558	0.799	0.246	0.315
54862	0.514	0.903	0.367	0.406	-0.517	0.102	0.153	-0.753	0.637	0.614	-0.354	0.191	0.025	-0.14	-0.675	0.15	0.451	-0.325	-0.092	-0.591	-0.21	-0.423	-0.091	0.028	-0.574	1.317	-0.294	0.602	0.142	0.521	-0.685	0.301	-0.236	-0.185	0.774	0.002	0.304	0.272	-0.204	-0.375	-0.497	0.153	-0.121	0.567	0.235	-0.052	-0.36	0.569	0.609
9546	-0.348	0.354	-0.11	0.757	0.452	0.742	0.525	-1.292	0.067	0.425	-0.587	0.248	-0.69	1.551	-0.494	-0.069	-0.414	0.053	0.371	0.186	0.134	-1.073	-0.232	-0.399	0.377	1.124	0.661	0.014	0.121	0.836	-1.18	0.121	0.637	0.463	0.33	-0.22	-0.347	-0.222	-0.277	-0.826	0.376	0.624	-0.414	0.676	0.46	0.05	-0.752	0.493	0.876
9063	-0.303	0.573	-0.493	0.484	0.639	-0.086	-0.994	0.305	-0.509	-0.022	0.145	0.388	-0.599	-0.131	0.167	0.4	1.073	0.085	0.324	-0.525	-0.136	0.512	0.222	-0.318	0.116	-0.281	0.313	-0.736	-0.655	-0.453	0.982	0.216	-0.607	-0.006	-0.229	-0.254	0.125	0.181	0.124	-0.82	0.936	-0.592	0.174	0.194	0.289	-0.049	0.469	0.131	-0.022
22889	-0.136	1.038	0.589	-0.672	0.393	0.699	0.877	0.496	0.814	0.565	0.723	1.196	0.582	1.212	-0.266	0.593	0.788	1.137	0.517	0.655	0.929	0.463	0.638	1.126	0.457	0.727	0.916	0.292	0.969	0.199	0.567	0.731	0.88	1.137	1.461	1.24	0.342	1.248	1.132	1.158	0.692	1.492	0.809	0.783	1.336	0.617	0.627	0.739	0.93
29957	0.052	-1.765	-1.151	-0.198	-0.171	0.397	0.516	1.191	-2.664	-2.698	0.405	-1.174	-0.428	-0.233	0.767	-0.913	1.07	0.679	-0.94	-0.25	0.81	2.035	-0.048	-0.803	-0.703	-2.24	1.544	-3.237	-1.292	-1.635	0.188	-0.984	-0.379	1.405	-0.642	-0.99	-0.381	-1.703	1.039	1.629	1.793	1.629	1.266	-0.338	0.409	1.666	1.793	-2.067	-0.676
118424	-0.828	1.103	-0.061	0.355	0.012	0.32	0.997	0.644	0.536	0.796	0.036	-0.17	-0.349	0.58	0.039	-0.052	1.396	-0.638	0.729	-0.169	-0.406	0.681	-0.115	0.183	0.312	1.672	0.67	0.307	-0.072	0.366	1.142	-0.906	0.413	0.38	0.1	-0.03	-0.226	0.142	-0.117	0.266	0.477	0.377	0.43	0.684	1.163	-0.267	0.993	1.084	0.092
647163	-0.153	0.026	-0.1	0.293	0.144	-0.926	-0.263	0.194	-0.108	0.003	-0.022	0.131	-0.066	0.013	-0.255	-0.068	0.001	-0.297	0.04	-0.135	-0.553	-0.425	-0.264	-0.075	-0.115	0.135	0.004	0.245	-0.694	-0.241	0.42	-0.681	-0.017	-0.384	-0.179	-0.14	0.371	0.377	0.007	0.08	0.008	0.058	-0.197	-0.593	-0.052	-0.443	-0.462	-0.11	0.244
374819	-0.227	2.808	1.43	1.419	0.057	2.39	-0.779	1.007	1.403	-0.148	0.566	1.247	2.372	0.165	-1.121	3.129	0.558	1.99	0.062	1.704	0.194	-1.126	0.611	-0.02	-1.067	1.518	2.237	1.192	3.658	2.406	-0.757	0.84	0.803	0.084	0.742	3.038	-1.439	1.72	0.497	-1.182	-0.038	0.302	0.877	-0.275	1.092	0.345	1.886	-0.048	1.385
10221	0.064	0.27	-0.382	0.044	-0.149	-0.404	0.391	-0.615	-0.841	-0.792	0.107	-0.762	-0.309	-0.317	0.399	-0.61	-0.357	-0.665	0.201	-1.104	-0.273	0.371	-0.909	-1.434	-0.177	-0.518	-0.228	-1.147	-0.439	-0.707	0.002	-0.088	-0.626	-0.388	-1.042	-0.707	-1.075	0.256	-1.505	-1.937	0.275	0.31	-0.26	-0.222	-0.983	-0.793	-0.497	-0.935	-0.21
197135	1.358	1.303	0.095	-0.396	-1.899	0.529	0.119	0.533	-1.761	-1.342	-0.229	1.31	0.112	-0.594	-0.732	0.879	-0.458	0.23	0.971	-0.367	1.153	-0.099	-0.853	-0.389	-1.36	0.846	0.709	-0.955	0.548	0.937	0.334	3.279	-0.292	2.227	0.444	-0.738	0.442	-0.871	0.518	-2.24	0.261	1.477	-0.347	0.486	0.113	1.329	0.218	-0.295	-0.349
7589	0.556	0.71	0.119	0.291	0.432	-0.443	0.655	0.53	0.953	1.04	-0.53	0.857	-0.15	0.758	1.168	0.875	0.094	0.038	0.344	-0.183	-0.212	0.582	0.277	0.581	0.841	0.358	-0.132	-0.022	0.714	0.526	-0.1	-0.277	0.483	-0.657	0.568	0.485	1.492	-0.075	0.487	1.014	-0.277	0.346	-0.661	0.523	0.024	0.08	-0.426	0.627	0.464
644567	-0.888	-0.691	-0.557	-1.816	0.775	-2.282	-0.897	-0.115	-0.021	-0.936	-1.52	-1.05	0.598	-0.836	0.471	-1.273	-2.429	-0.382	-1.125	2.316	-1.293	-0.751	0.298	-1.104	0.117	-1.355	-1.031	1.198	0.558	1.135	-0.532	-2.178	0.978	-2.823	-1.479	1.885	0.794	-2.403	-1.57	-1.616	-0.236	-0.21	-1.307	-2.928	-0.778	-1.127	-1.748	-0.748	-1.258
731992	1.6	-0.662	0.31	0.752	0.095	0.1	1.841	-0.591	-0.653	0.013	-1.576	0.682	0.495	-0.704	-0.412	0.213	-0.887	-0.495	0.124	-0.852	-0.404	-0.189	-0.115	-0.013	-0.204	0.669	-1.208	-0.663	-0.504	0.601	-0.394	-0.122	-0.784	0.184	0.198	-0.238	0.475	0.537	-0.003	-0.381	0.439	-0.295	-0.576	-0.431	-1.05	0.379	-0.034	0.264	-0.947
4318	0.529	2.005	0.666	-0.364	0.411	4.429	0.662	3.563	0.796	-0.186	3.12	-1.48	1.142	-0.6	1.637	-0.065	1.528	2.964	1.43	1.651	3.386	0.82	-0.5	-0.179	2.546	0.874	5.128	-0.399	1.631	0.226	0.155	0.308	2.76	4.235	-0.865	0.466	2.047	0.197	2.533	-1.328	-0.215	3.334	3.57	2.539	1.036	3.819	3.353	-0.862	2.08
643703	-0.683	0.372	0.376	-0.097	-0.016	-0.356	0.05	-0.259	-0.084	-0.131	-0.317	0.129	-0.229	-0.387	-0.184	-0.288	-0.154	-0.503	-0.401	-0.083	-0.961	-0.158	0.032	0.044	0.003	0.283	-0.69	-0.012	-0.402	0.127	-0.074	-0.847	-0.323	-0.686	0.078	-0.897	-0.261	0.172	-0.332	-0.09	-0.474	0.049	-0.184	0.294	-0.033	-0.572	-0.485	-0.035	0.192
677810	-0.758	3.182	-1.529	-0.514	2.054	1.237	-0.543	-0.501	0.376	0.315	0.936	0.466	0.024	0.452	2.443	2.098	0.424	5.533	1.269	2.693	0.341	0.445	1.177	-0.648	1.656	0.459	5.324	0.992	-0.115	-0.17	0.308	-0.059	4.172	2.251	1.114	1.526	0.132	-0.248	1.02	-0.922	0.061	1.973	3.335	-0.583	2.023	1.338	-0.224	-0.198	0.002
79875	-1.187	-1.843	-0.73	0.653	-1.22	0.275	0.799	-1.388	0.381	1.959	-1.13	0.277	-2.138	0.254	-1.951	-1.329	-0.099	-1.548	-0.008	-2.138	-0.947	1.055	0.082	0.524	-1.039	0.737	-1.68	-1.546	0.277	0.409	-0.237	-1.555	-1.196	-0.084	1.319	-1.356	-1.189	0.174	-1.754	-0.06	-0.07	-2.417	-1.326	0.672	-1.514	-0.035	-0.294	0.422	-1.834
440299	-0.208	0.628	0.036	0.297	0.293	-0.138	0.532	0.402	0.093	0.322	-0.377	1.003	0.431	0.526	-0.638	0.017	1.079	0.225	-0.001	0.15	-0.132	0.354	0.223	-0.15	0.233	0.652	0.115	1.067	0.266	0.188	0.602	0.739	-0.023	0.043	0.036	-0.154	-0.035	0.258	-0.2	0.663	0.487	0.531	0.281	0.564	0.101	-0.192	0.315	0.18	0.572
388078	-0.383	-0.076	0.092	0.509	-0.116	-0.441	0.21	-0.917	-0.161	0.064	-0.51	-0.121	-0.324	0.133	-0.122	-0.087	-0.533	-0.504	-0.377	-0.139	-0.593	-0.46	-0.414	-0.072	0	0.481	-0.417	0.091	0.039	0.377	-0.416	-0.357	-0.306	-0.493	-0.13	-0.18	0.121	0.041	-0.401	-0.031	-0.222	0.24	-0.038	-0.452	-0.41	-1.042	-0.431	-0.26	-0.457
3232	0.165	-0.514	0.886	0.473	0.021	0.135	0.142	0.648	1.623	0.302	0.906	1.176	0.208	2.185	-0.75	0.509	0.751	0.48	1.077	0.825	0.424	-0.172	0.018	0.914	2.838	1.51	1.144	1.345	0.283	0.188	0.555	3.159	3.875	0.643	3.861	0.001	1.269	2.592	0.45	3.544	0.487	1.474	0.455	0.176	2.448	-0.202	0.981	0.202	0.231
56898	-1.183	-2.096	-1.325	-0.109	-1.701	-1.217	-0.374	0.269	-0.107	0.946	-1.104	0.198	-1.443	-0.419	-2.295	-0.849	-1.404	-2.208	-1.72	-2.514	0.028	-2.621	-1.891	1.515	-2.142	-1.557	-3.019	-0.987	-2.688	-0.606	-1.627	-0.888	-1.444	-0.861	-0.508	0.58	-1.412	-0.532	-0.478	-2.225	0.128	-3.38	-1.334	-0.384	-2.284	-0.132	-2.697	-1.665	-1.665
29911	0.432	0.477	-0.189	0.951	-0.233	-0.416	-0.143	-0.492	1.152	0.377	0.084	-0.236	1.602	-0.334	0.205	0.053	0.249	-0.016	0.148	0.274	-0.439	-0.768	-0.748	0.172	1.027	0.037	0.147	-0.231	-0.918	-0.399	-0.197	0.241	0.136	-0.548	0.478	0.81	-0.899	-0.081	-0.125	0.033	0.179	0.133	-0.359	0.346	-0.988	-0.502	-0.146	-0.081	2.029
4061	-0.614	-1.106	-2.365	0.075	-1.226	0.272	-3.528	-4.191	-3.252	-4.015	-0.893	-5.232	-1.16	-3.667	-2.526	-3.645	0.236	-1.48	-1.718	-3.437	-2.716	-1.892	-2.701	-4.278	-3.438	-2.315	-2.015	-2.749	-4.12	-3.231	-0.77	0.292	-1.347	-0.79	-2.464	-0.149	-2.441	-0.685	-4.759	-5.312	-4.807	-3.835	-2.352	-1.975	-2.371	-1.945	-0.112	-2.104	-0.796
10746	0.592	-0.3	-0.208	0.89	-0.396	-0.242	-0.763	0.488	-0.875	-0.372	-0.601	-0.077	-0.028	-0.819	0.513	0.893	0.294	-1.253	0.569	0.332	-0.545	-0.456	-0.513	0.338	-0.285	-0.291	0.366	0.079	-0.044	0.29	-0.193	0.72	-0.397	-0.753	0.636	-0.643	0.312	-0.118	-0.09	0.249	-0.182	0.54	-1.079	0.071	-0.776	0.149	-1.522	0.212	-0.134
56935	0.167	-1.077	-1.174	-0.03	0.623	-0.035	-0.9	0.158	-0.78	0.288	-0.978	0.064	-0.225	-1.327	-2.367	-1.003	0.147	-1.091	-1.251	-1.023	0.107	-1.52	-1.066	-0.213	0.747	-2.039	-0.537	-1.921	-0.907	-0.348	-0.214	0.017	-0.418	-0.778	-0.503	0.463	0.151	-0.619	-0.017	-0.515	-0.277	-0.512	-0.786	-0.229	-0.871	-0.456	-1.615	-0.565	0.032
58529	-0.314	-0.206	-1.084	-0.521	-1.563	0.548	-0.123	0.109	-0.414	-0.623	1.365	-0.594	-0.548	0.448	-1.097	-0.65	-0.265	1.159	2.319	-0.305	0.646	0.782	1.026	-0.019	-2.007	-0.75	0.328	0.512	-0.142	-0.412	-0.511	-0.3	-0.385	0.123	-0.723	0.951	-2.028	-1.123	-0.382	0.689	-1.433	-0.325	-0.521	-0.2	0.002	0.793	-0.591	-0.208	0.93
284004	-0.241	1.534	-0.383	0.898	-0.073	-0.408	0.205	0.675	0.172	0.322	-0.662	0.539	0.333	0.381	0.481	-0.113	-0.352	0.298	0.756	-0.336	-0.416	-1.09	0.297	-0.172	-0.96	0.107	0.486	0.311	-0.181	0.293	-0.337	0.778	0.085	0.649	1.289	0.522	-0.288	0.313	0.874	0.002	-0.615	0.32	0.151	0.371	0.364	-0.374	-0.138	0.147	0.377
6744	0.016	-0.188	-0.209	1.15	-0.011	-0.572	-0.964	-0.525	-0.23	-0.58	-0.033	-0.357	-0.321	-0.022	-0.383	-0.688	-0.033	-0.521	-0.138	-0.132	-0.267	0.373	-0.238	-0.769	-0.236	-0.571	0.052	-0.372	-1.548	-0.916	0.206	0.104	-0.704	-0.559	-0.779	0.623	0.502	-0.324	0.318	0.007	-0.437	-1.046	-0.212	-0.592	0.03	0.59	1.297	-0.964	-0.218
401504	-1.788	-2.084	0.087	-0.618	0.35	-0.517	-0.311	-0.308	0.494	-0.095	0.348	0.938	-0.846	0.343	-0.089	-1.685	-1.478	-0.612	-0.346	-0.378	-0.66	-0.316	-1.6	1.554	-0.146	-0.11	-0.613	-0.483	-1.021	-0.32	-1.148	-0.359	-0.135	-0.234	-0.142	-2.009	-0.635	-0.117	0.824	0.996	-0.374	-2.977	-0.986	-2.472	-0.161	0.209	0.186	-1.797	-1.624
57488	-0.265	0.262	0.018	-0.229	-0.247	-0.051	-0.489	-0.066	0.03	0.337	-0.295	-0.068	-0.676	-0.045	0.994	-0.077	1.294	-0.348	0.635	-0.25	0.189	0.027	0.358	-0.706	0.082	0.18	-0.683	0.333	1.062	0.16	0.273	-0.253	0.08	0.134	-0.723	-0.723	0.625	0.106	-0.374	-0.008	-0.524	-0.326	-1.079	-0.236	0.142	0.435	0.149	0.283	-0.366
677799	-0.321	0.015	0.047	0.134	-0.126	-0.284	0.472	-0.622	1.207	-0.04	-0.612	0.431	0.462	-0.053	-0.07	0.226	-0.238	0.354	-0.293	0.56	-0.633	-0.013	-0.124	1.216	-0.469	0.444	0.678	-0.707	0.071	0.424	-0.347	-0.098	-0.492	-0.053	0.236	1.043	-0.266	-0.201	0.156	-0.209	0.324	0.209	-0.238	0.739	-0.047	-0.381	-0.087	-0.268	0.317
3421	0.255	0.307	0.012	0.264	-0.48	0.269	0.171	0.063	0.09	0.499	0.654	-0.07	0.082	0.206	-0.766	-0.114	-0.044	0.097	0.372	-0.34	0.24	-0.157	-0.168	-0.33	0.464	1.18	-0.005	-0.309	0.13	0.673	-0.492	0.643	0.094	0.248	0.015	-0.326	-0.184	-0.158	-0.121	0.379	0.361	-0.191	-0.382	0.265	0.831	-0.002	-0.096	-0.001	0.544
84451	-1.026	-0.198	0.833	-1.196	0.079	0.905	0.428	0.926	-0.166	-0.272	0.21	-3.318	-0.687	-0.305	-2.767	0.236	1.171	-2.28	1.653	-3.473	-0.712	1.879	-0.007	-0.592	-0.35	-1.941	0.285	-0.356	0.972	0.572	0.599	-1.586	-1.781	-1.836	1.686	-0.75	-3.459	1.552	0.6	0.723	0.253	-0.186	0.49	0.272	0.633	0.608	-0.692	2.24	-2.123
84975	-0.132	0.805	0.571	-0.158	0.458	0.594	0.79	0.656	1.649	0.557	0.647	-0.235	-0.228	0.412	0.826	0.925	0.892	0.208	0.793	1.07	0.546	0.757	0.531	0.259	0.679	0.328	0.434	0.598	0.796	0.855	0.524	-0.485	0.12	0.19	1.323	0.466	0.466	0.769	1.515	-0.496	1.291	1.33	0.974	0.146	0.288	-0.031	0.594	0.934	0.309
147949	-0.703	-0.084	0.149	0.357	0.859	-0.385	0.499	-0.783	0.543	0.11	-0.117	0.62	0.157	0.731	0.548	0.161	-0.112	-0.063	-0.732	0.915	0.651	0.337	-0.359	0.489	1.515	0.602	0.439	0.027	0.612	0.08	0.534	-0.971	0.663	-0.602	1.579	0.263	0.242	0.383	0.481	0.203	0.296	0.906	-0.132	-0.006	0.484	-0.346	0.286	0.17	0.075
51660	-0.347	-2.443	-1.138	0.46	-1.037	-0.995	-0.282	-0.539	-0.741	-0.327	-0.493	-0.777	-0.228	-0.471	-0.373	-0.896	-0.521	-0.351	-1.148	-0.309	-0.346	-0.927	-1.523	-0.209	-1.268	-0.656	-0.938	-1.117	-1.891	-1.018	-0.587	-0.949	-0.895	-1.905	-0.814	-0.887	-0.48	-0.37	-0.312	0.3	-0.932	-3.117	-1.022	-0.533	-0.874	-0.382	-0.758	-1.463	-0.78
23562	1.282	-1.457	0.778	1.879	-0.201	-1.653	2.256	-0.55	2.948	0.187	-1.286	0.932	0.841	1.12	0.312	0.281	-0.319	-0.994	0.837	-0.765	-1.298	0.013	0.787	1.133	-2.055	-0.175	-2.684	-0.104	-0.264	0.423	-1.581	1.263	-1.674	-1.389	1.754	2.137	0.552	0.539	0.968	2.799	0.884	-3.067	-2.192	0.282	-1.868	-0.086	-2.889	-1.853	1.106
56301	-1.277	2.081	-0.995	1.197	2.266	1.198	-0.255	-1.144	3.768	0.392	0.839	-0.318	1.459	1.588	-2.079	1.011	1.06	4.389	2.028	1.692	-0.7	-0.717	-0.124	0.613	2.179	1.259	-0.771	-1.757	0.416	0.686	1.213	-0.091	-0.473	0.169	3.216	3.229	-0.551	1.557	-0.704	1.559	-1.69	4.216	0.119	0.445	-0.613	1.136	0.837	1.147	0.524
94	0.519	-0.721	-0.725	-0.936	-0.168	0.906	-0.758	-0.258	-0.62	0.835	0.51	-1.109	0.104	1.63	-0.408	0.115	-0.376	1.622	0.146	1.458	0.25	0.72	-0.212	0.413	-0.289	1.251	1.057	-0.599	0.854	0.109	0.188	0.633	0.841	0.598	-1.358	-0.38	-0.223	-1.09	-0.135	0.123	-1.119	-1.066	0.878	0.694	0.825	0.556	0.933	1.26	0.371
339366	0.285	0.299	-0.452	0.275	-0.417	-0.264	1.078	-0.055	0.429	0.512	0.171	-0.368	-0.761	-0.424	-0.285	0.872	-0.116	-0.036	0.433	-0.391	-0.999	-0.563	0.051	0.445	-0.749	0.098	-0.762	-0.041	-0.293	-0.083	0.071	-0.861	-1.148	-0.138	0.567	-0.737	0.155	0.338	-0.409	0.236	0.015	-0.404	0.483	0.205	-0.151	0.44	-0.041	0.299	0.446
57547	0.131	0.125	-0.049	-0.228	0.54	0.724	-0.909	1.77	1.088	-0.499	0.562	0.401	0.428	0.153	0.066	1.108	-0.424	0.878	0.342	0.134	1.014	1.409	-0.62	-0.096	0.169	-0.112	0.863	0.491	0.729	-0.822	0.738	0.247	0.962	-0.319	1.1	0.412	-0.051	-0.552	2.274	0.618	-0.05	-0.302	1.148	0.123	0.162	0.217	1.467	-0.113	0.43
388695	0.489	0.467	0.889	1.074	1.068	0.363	0.669	0.416	0.809	0.391	0.691	0.543	1.204	1.041	0.404	1.24	0.861	0.406	0.939	0.71	0.034	1.765	0.37	0.979	0.985	0.702	-0.132	0.462	0.659	0.87	1.656	0.228	0.065	-0.572	1.856	0.983	1.172	0.869	0.423	1.705	1.494	1.554	0.419	1.398	-0.038	-0.04	0.369	1.028	1.196
154288	-0.225	-0.038	0.393	0.794	0.111	-0.343	0.013	-0.024	-0.171	0.332	-0.344	-0.126	-0.324	0.039	-0.041	-0.046	0.079	0.012	-0.24	0.325	-0.62	-0.019	0.036	-0.058	0.019	0.593	-0.624	0.621	-0.475	0.432	0.242	-0.757	-0.769	0.125	0.337	-0.016	-0.026	-0.24	0.181	0.453	0.436	0.461	-0.435	-0.355	-0.461	-1.051	0.183	-0.313	-0.059
11234	-1.816	-0.169	-1.364	0.004	-2.127	-0.688	0.095	-0.431	-1.415	-0.102	-0.524	-0.575	-0.86	-1.826	-1.668	-0.715	-0.798	-1.17	-1.984	-1.97	-0.624	-0.91	-0.674	-1.333	-0.785	-0.378	-0.726	-2.261	-1.56	-1.04	-0.779	-0.383	-0.508	-0.85	-0.783	-2.726	-0.371	-2.42	-1.42	-1.068	-0.178	-1.087	-1.66	-0.622	-0.955	-1.594	-0.92	-0.676	0.157
403323	-0.166	-0.148	-1.008	0.022	-0.376	-2.693	0.021	-0.596	1.631	-0.389	-1.59	0.053	-0.395	0.244	-2.259	-0.297	-1.074	-0.21	-0.003	1.572	0.66	-0.188	-0.599	-0.252	0.131	1.044	-0.734	0.573	0.098	0.852	0.324	0.093	-0.298	-0.497	0.046	-1.82	0.024	-0.988	-0.591	-0.569	0.286	0.167	-1.084	2.61	-0.344	-0.461	-0.476	0.75	0.617
1768	0.48	0.503	-0.263	0.866	0.192	-0.53	0.558	0.869	0.41	0.414	-0.433	0.683	-0.342	0.119	0.024	0.259	0.178	-0.283	0.071	-0.02	-0.577	0.419	0.332	1.623	0.164	0.478	-0.126	1.294	-0.165	0.274	0.094	-0.375	-0.544	-0.313	0.237	0.35	0.601	-0.546	0.136	0.019	0.238	0.735	-0.356	-0.129	0.399	-0.048	-0.127	0.211	0.18
27309	-0.633	0.104	-0.543	0.699	-0.272	-0.959	-0.617	-0.099	-1.124	0.163	-1.007	0.094	-0.59	-0.311	-1.058	-1.78	-0.675	-0.548	-0.84	-0.885	-0.413	-0.857	-0.705	-0.161	-0.554	0.011	-1.226	-0.55	-0.799	-0.318	-0.185	-0.68	-0.45	-0.429	-1.322	-1.024	-0.613	-0.959	-0.704	-2.261	-0.84	-2.258	-0.403	-0.789	-0.29	-0.468	-0.205	-1.199	-0.802
84164	0.35	0.204	0.408	-0.637	0.905	-0.016	0.733	-0.182	0.026	0.515	-0.486	0.282	-0.496	0.108	-0.147	0.442	0.517	0.013	-0.327	-0.096	-0.035	-0.183	0.519	0.506	1.29	0.309	0.003	0.517	0.853	0.61	0.457	0.059	0.964	-0.213	0.646	0.081	0.1	0.091	0.586	-0.726	-0.831	-0.144	0.203	0.711	-0.263	-0.286	-0.019	0.609	-0.562
3273	0.126	-2.309	-0.378	0.167	-2.568	-0.084	0.064	0.116	0.039	0.055	-0.028	0.08	-0.03	0.145	-1.32	-0.253	-0.165	-0.307	-2.098	-1.846	-0.487	0.176	-0.509	0.026	-2.203	-0.011	-0.867	-3.27	-0.265	-0.358	-0.402	0.024	-0.936	0.017	-0.209	-0.035	-0.593	0.154	-0.028	0.075	0.172	-2.528	-1.734	-0.034	-1.245	-0.075	-0.432	-0.412	-0.157
55786	-0.397	-1.637	-0.287	-1.456	1.457	-0.147	-3.13	0.114	-1.255	-1.524	-0.32	-0.366	3.399	-0.763	-0.348	-1.474	-0.587	1.843	0.15	-2.402	-0.698	0.755	0.487	-0.602	3.391	-2.836	0.222	-2.664	-0.627	-0.714	-2.137	0.226	-0.322	0.568	-2.731	-1.461	-0.227	-2.631	-0.025	-1.152	1.098	3.468	-1.602	-0.312	0.453	0.296	-1.821	-0.945	-0.17
8471	0.275	-0.435	0.221	0.398	0.165	-0.412	0.215	-0.371	-0.093	-0.17	-0.5	0.071	-0.409	-0.266	0.318	0.115	0.071	-0.339	-0.471	-0.681	-0.113	-0.418	0.407	-0.092	0.114	0.044	0.065	0.085	-0.208	0.39	0.407	-0.436	-0.2	0.161	0.166	0.119	-0.059	-0.246	-0.414	-0.23	-0.018	0.077	-0.17	-0.31	-0.021	0.031	-0.327	0.056	0.304
8288	-0.336	-0.063	-0.59	0.158	0.296	-0.274	0.48	-0.911	0.563	0.449	-0.757	-0.045	0.316	0.222	0.674	0.356	-0.747	-0.081	-0.103	0.115	-0.22	-0.378	-0.588	-0.128	-0.108	0.654	0.13	-0.024	0.427	-0.086	0.363	-0.05	-0.503	-0.382	0.218	0.197	0.285	0.565	-0.11	0.004	-0.217	0.193	-0.192	-0.293	0.278	-0.162	-0.578	-0.057	-0.203
1290	0.186	1.326	0.188	-0.132	0.357	1.808	-2.009	1.835	0.484	-1.717	1.281	-0.027	2.737	0.398	-0.289	0.581	0.755	2.211	0.791	-0.306	1.01	-0.1	0.763	-1.134	1.951	-1.463	2.704	-2.002	-0.461	-0.22	-0.349	1	2.324	2.239	-1.428	1.629	-0.699	-0.551	-0.358	-1.092	0.682	-1.013	1.933	1.402	1.84	1.525	-0.548	0.583	0.953
27037	0.401	0.414	-0.054	0.073	0.32	0.427	0.24	-0.219	-0.082	0.634	-0.003	0.651	0.198	0.449	-0.205	0.536	0.887	0.015	-0.061	-0.378	-0.09	-0.064	-0.098	0.498	0.539	1.346	0.546	0.271	0.274	0.693	0.338	0.66	1.11	0.294	0.412	0.844	0.013	-0.158	-0.629	-0.252	-0.768	0.556	0.677	0.231	-0.434	-0.441	0.267	0.568	0.606
85416	0.059	2.323	1.644	0.19	3.528	0.084	2.209	1.796	4.376	0.008	2.237	0.068	0.619	2.164	0.775	1.783	3.081	0.135	3.029	2.594	0.171	-0.196	-0.068	0.341	3.889	-0.199	2.326	1.195	0.186	0.161	3.999	-0.512	3.723	2.867	3.818	0.217	1.715	4.894	3.675	2.04	2.77	2.361	3.061	0.967	0.735	0.054	1.961	-0.08	0.546
83667	0.662	0.899	-0.453	0.655	-0.484	-0.27	0.071	0.816	0.689	0.502	-0.367	-0.145	-1.52	0.953	-0.232	0.134	1.476	-1.102	0.843	-0.939	-0.558	0.151	0.71	-0.014	-0.585	1.027	-0.716	0.366	-0.458	0.712	1.384	0.315	0.12	-0.322	0.399	0.493	0.118	0.069	0.894	-0.566	1.804	1.618	0.317	0.7	1.047	0.134	0.773	1.054	-0.809
10283	-0.23	0.448	1.281	0.193	0.385	0.132	0.319	-0.155	0.345	-0.176	0.026	0.127	1.173	0.355	1.149	0.601	-0.113	0.033	0.854	0.758	1.045	0.856	0.788	0.302	1.035	0.078	1.215	0.219	0.069	-0.143	1.169	0.389	0.888	0.141	0.613	0.053	0.488	0.5	0.722	0.194	1.188	-1.026	1.126	-0.41	0.31	0.343	1.272	0.754	0.53
8870	0.357	-0.009	-0.52	0.178	0.656	1.167	-1.748	0.295	-3.808	-0.022	1.738	-2.591	0.263	-0.872	-0.242	-2.163	0.563	0.284	-1.528	-1.499	0.859	-0.53	-0.999	-2.197	-0.573	-1.841	1.264	-1.765	-0.172	-2.658	0.313	0.334	0.883	-0.277	-1.503	-0.673	-2.849	-1.334	-0.85	-2.29	-1.499	2.083	1.643	0.059	-0.038	-1.056	-0.969	0.501	-0.149
1964	0.333	-0.402	0.035	-0.188	-2.273	-0.529	0.226	-0.09	0.305	0.243	0.012	0.692	0.3	-0.106	-0.157	0.396	-0.255	-0.038	0.056	0.937	0.17	0.327	0.03	0.662	-1.222	-0.293	-0.758	-0.135	0.723	0.13	0.571	-0.545	-0.564	-0.528	-0.46	0.157	-0.145	0.194	0.296	0.237	0.541	-1.308	-0.562	-0.398	-0.189	0.098	-0.4	-0.266	-0.381
284325	0.022	0.426	-0.483	0.394	-0.116	-0.113	0.618	-0.082	0.164	0.298	0.149	0.116	0.547	0.913	-0.418	1.048	-0.643	0.086	0.698	0.201	0.136	-0.004	-0.455	0.706	1.354	0.862	0.515	-0.252	-0.466	0.224	-0.466	0.425	-0.333	0.712	1.73	0.134	-0.08	-0.072	0.543	0.64	0.566	1.193	-0.76	0.769	-0.005	-0.173	0.23	-0.172	-0.615
857	0.08	0.436	-0.217	-0.343	-0.514	0.271	-0.645	0.812	-0.485	-0.697	0.355	-0.667	0.184	-0.187	-0.494	0.787	0.209	0.857	0.072	1.212	0.25	-0.146	0.046	-0.019	-0.147	-0.487	0.56	-1.15	0.311	-0.293	-0.994	1.264	0.237	1.204	-0.737	-0.156	-0.751	-0.09	0.497	0.624	-0.586	0.382	-0.217	0.036	0.91	0.861	0.42	0.186	0.344
3714	0.211	-0.209	0.114	-0.687	0.387	1.648	-0.222	0.056	1.265	0.596	1.198	-0.133	1.046	0.239	-0.496	-0.156	-0.246	2.933	0.693	0.665	0.811	1.048	0.643	0.505	-0.484	1.299	1.666	0.539	0.647	0.062	0.13	1.536	0.507	1.635	1.575	0.932	-0.778	0.667	-0.219	-0.027	0.011	-0.698	1.825	1.016	0.84	0.621	1.472	0.358	0.903
55326	1.13	0.735	-0.012	-1.655	0.607	0.389	-1.024	0.77	-1.231	-1.406	-0.614	-0.564	-1.102	-0.12	0.909	0.202	-0.206	0.351	0.537	1.24	1.341	0.711	1.006	0.188	1.028	-0.891	-0.317	-0.16	-0.447	0.48	0.843	0.198	0.464	-0.392	0.4	-0.169	-0.076	0.827	0.024	-0.006	-0.543	-1.594	-1.217	-0.605	-1.516	-0.089	-0.331	0.497	-1.401
55222	1.37	1.515	1.111	0.984	0.104	0.135	1.167	1.643	2.592	1.414	0.114	1.387	1.646	1.731	1.148	1.743	1.758	-0.939	0.984	0.961	1.138	1.038	1.076	0.732	-0.894	2.951	0.137	1.23	1.004	1.969	1.245	1.965	0.45	1.33	1.715	0.226	0.691	0.373	1.431	1.48	1.053	2.495	1.434	2.044	1.245	-0.368	0.901	2.071	2.597
5800	-1.331	-1.091	-1.581	-0.16	0.358	-0.081	-1.906	0.582	-2.854	-1.588	1.239	-1.817	-1.771	-0.052	-0.666	-0.197	0.26	-1.035	-0.911	-0.365	0.586	-0.618	-1.143	-1.371	1.034	-1.068	1.74	-1.467	-2.328	-0.94	-1.099	-2.306	0.139	1.349	-2.821	-2.02	0.402	-1.885	0.057	-1.542	-0.721	-1.135	0.216	-0.117	-0.429	0.304	2.179	-2.43	-1.601
11238	-1.186	1.131	0.817	-0.143	-0.961	1.479	-0.626	-0.083	0.276	0.856	0.376	-0.482	1.171	-0.091	0.058	0.357	0.24	1.16	-0.544	1.438	1.256	0.163	0.872	-0.231	0.244	1.245	0.195	0.135	1.469	3.144	0.494	-0.191	-0.018	0.552	-0.104	0.375	0.927	0.046	1.852	-1.312	0.626	0.281	-0.09	0.63	2.782	0.312	-0.503	0.205	-0.019
6850	-0.166	0.201	-1.123	-0.093	-1.384	1.305	-2.141	0.26	-2.36	-0.797	0.976	-2.259	-0.725	-0.26	-0.563	-1.252	-0.12	0.059	-0.147	-0.493	1.042	-0.91	-0.903	-1.25	-0.302	-1.808	1.429	-1.728	-1.032	-0.895	-1.296	0.142	0.574	1.679	-1.262	-1.572	-0.698	-1.878	0.107	-1.63	-3.263	0.006	0.106	-0.081	0.017	0.653	1.775	-1.663	-0.871
170685	-1.9	-3.73	-4.126	-1.391	-2.409	-3.152	-4.015	-2.875	-4.296	-3.748	-0.89	-4.116	-1.462	-1.963	-2.555	-3.072	-3.331	-2.501	-3.538	-1.963	-3.354	-2.927	-0.92	-3.435	-2.475	-3.034	-3.956	-3.706	-3.111	-2.564	-2.045	-3.959	-1.389	-2.981	-4.604	-3.79	-3.002	-3.814	-1.176	-1.445	-2.943	-2.165	-2.926	-2.291	-3.195	-2.93	-3.853	-4.365	-3.387
6334	0.587	0.593	0.404	0.828	0.618	-0.007	-0.256	0.514	1.787	0.789	-0.023	0.986	0.183	-1.129	-0.849	1.319	0.528	-0.541	0.831	0.337	0.419	-0.271	-0.025	0.616	0.268	1.388	-0.205	0.159	0.319	0.919	1.283	1.301	-0.572	-0.617	1.791	0.606	0.447	1.313	0.057	1.769	0.624	-0.69	1.752	0.353	-0.059	0.433	-0.214	0.977	0.836
84618	-0.338	0.119	-0.384	-0.836	0.084	-0.02	-0.877	-0.813	-0.346	0.12	0.025	0.374	-0.375	-0.028	0.263	0.165	0.157	-0.047	0.045	0.132	-0.34	-0.292	-0.408	-0.014	0.037	0.205	-0.151	-0.159	-0.072	0.043	-0.109	-0.664	-0.271	-0.229	-0.088	0.042	-0.502	0.356	-0.629	0.066	0.46	0.59	0.046	0.106	-0.201	-0.883	0.359	-0.123	-0.258
284598	-0.273	0.029	-0.818	-0.346	-0.206	-0.503	-0.927	-0.588	-0.231	-0.126	-0.288	-0.039	-0.273	-0.196	-0.752	-0.235	-0.406	-0.155	-0.018	-0.737	-0.704	-0.197	-0.187	-0.637	-0.311	-0.319	-0.434	-0.471	-0.45	0.011	-0.615	-0.764	-0.523	-0.936	-0.205	-0.59	-0.799	-0.225	-0.244	-0.55	-0.424	-0.221	-0.282	-0.698	-0.22	-0.5	-0.524	-0.395	-0.178
64065	-1.666	-1.062	-0.223	0.087	0.261	-0.572	-0.559	0.363	-0.764	-0.243	-0.286	-1.933	-1.21	-0.223	-3.128	-2.277	-0.125	0.217	-0.826	-0.67	-0.787	0.025	-0.671	-0.905	-0.49	-0.796	-0.165	-0.35	-0.646	-1.002	0.435	-1.2	-0.453	-3.079	-0.212	-0.268	-0.545	0.604	-1.317	0.595	0.321	-2.62	0.05	-0.885	0.295	0.324	-0.059	-1	-0.855
27076	0.706	-0.113	0.405	0.088	-1.575	1.035	0.856	0.194	1.485	0.736	0.9	0.241	0.131	0.316	-0.752	0.407	0.852	-0.244	0.558	-1.022	1.139	-0.155	-0.434	0.093	0.091	0.607	0.413	0.751	-0.225	-0.048	0.686	0.013	0.449	1.342	1.561	0.267	1.07	0.035	0.292	0.593	2.645	3.386	-0.236	0.449	0.062	0.936	-0.009	0.348	0.734
121053	1.185	-0.44	0.204	0.03	-0.372	-0.116	0.079	0.297	-0.679	-0.286	-0.522	-0.221	-0.53	0.048	0.153	0.611	-0.418	-0.195	1.241	-0.232	0.326	0.289	0.334	-0.758	0.295	-0.764	0.406	0.475	-0.651	0.82	-0.232	-0.114	-0.307	0.601	0.872	-0.424	0.961	0.274	0.753	0.878	0.676	-0.715	0.679	0.326	-0.193	-0.522	0.391	0.589	0.598
149428	-0.21	1.508	-0.108	-0.145	1.398	0.841	0.291	-0.207	0.38	1.001	-0.533	1.323	0.095	1.456	0.04	0.949	0.414	0.839	1.973	2.116	-0.075	0.244	-0.589	0.757	0.353	1.593	-0.612	0.133	0.969	0.025	1.004	0.196	0.721	1.147	0.055	0.663	0.399	0.666	0.217	1.793	-1.156	1.415	0.249	0.441	0.286	0.848	-0.093	0.097	0.052
352961	0.849	2.499	0.367	-0.773	-1.452	1.119	0.853	-0.372	-1.111	0.526	0.773	-0.045	0.127	0.804	-0.514	0.001	0.584	-0.034	0.25	-0.829	1.408	-0.173	-0.603	0.82	-0.519	1.465	0.981	-0.282	1.654	-0.206	-0.683	2.395	0.668	2.846	0.114	-1.403	0.191	0.397	1.882	-1.081	0.026	0.37	-0.031	1.196	0.92	0.545	0.749	-0.634	0.049
3208	0.058	-0.294	-0.13	-0.141	0.352	-0.617	-0.223	-0.4	0.366	0.036	-0.294	-0.308	-0.236	-0.066	-0.226	-0.266	0.495	0.069	-0.364	0.177	-0.517	-0.228	-0.193	-0.423	0.03	0.33	0.085	-0.477	-0.517	0.011	0.027	-0.58	0.053	-0.613	-0.111	-0.182	-0.235	0.282	-0.094	-0.109	0.303	1.385	-0.172	-0.371	0.209	-0.25	0.394	0.214	0.123
375341	-0.583	1.446	0.376	-1.242	0.345	0.471	1.99	-0.093	2.038	0.829	1.05	1.038	0.447	-0.085	1.167	1.074	0.782	0.318	1.804	2.016	0.256	1.334	1.856	2.314	-0.095	1.488	0.939	0.154	1.036	0.904	1.849	0.833	0.273	1.063	0.553	-0.027	0.521	1.934	2.221	1.101	1.221	2.679	1.117	0.584	1.109	2.175	2.235	0.888	0.383
91749	-0.642	-1.245	0.2	0.874	1.043	0.027	-0.797	-0.223	-0.463	-0.661	-0.189	-0.669	0.57	0.194	0.906	-0.844	-0.032	-1.306	0.037	-0.418	0.036	0.246	-0.225	-0.472	0.059	-0.408	-0.309	0.533	-0.063	0.623	0.389	-1.734	-0.187	-1.072	-0.514	0.013	0.816	0.484	-0.936	0.572	0.5	-0.8	-0.526	-0.12	0.037	-0.327	-0.362	-0.53	0.712
196266	0.165	-0.213	-0.562	-0.984	-2.387	0.619	-1.425	-0.468	-0.802	0.139	0.538	-0.353	-0.14	0.103	-0.419	-0.337	-0.245	0.694	0.302	-0.26	-0.387	-0.434	0.234	-1.074	-1.279	-0.399	-0.686	-0.4	0.066	-0.462	-0.416	-0.105	-1.188	-0.126	-0.682	-0.578	-0.974	0.039	-0.454	-0.539	-2.018	-1.013	-0.191	-0.251	0.018	0.476	-0.65	-1.146	0.439
5977	0.184	1.04	0.149	-0.161	0.511	0.646	0.504	0.605	-0.043	0.33	0.248	0.05	0.649	1.334	0.56	1.226	0.814	0.368	1.428	0.092	0.384	1.089	0.501	-0.097	0.826	0.575	0.866	0.202	0.042	0.817	0.535	0.36	0.961	1.05	1.162	0.73	0.397	0.72	0.603	0.341	0.131	1.372	0.372	-0.178	0.526	0.643	-0.544	0.761	0.794
692085	-0.047	-1.165	0.078	-0.441	0.379	0.1	-0.031	-0.393	0.948	-0.905	0.567	0.483	-0.005	-1.029	0.403	1.381	-0.686	1.369	-1.349	0.586	0.467	0.41	0.146	0.062	0.328	-1.334	1.255	0.579	0.286	-0.354	-0.153	-0.38	0.487	-0.212	0.285	-0.321	-0.141	-0.535	0.671	0.539	0.642	0.424	1.812	-0.585	0.034	-0.878	0.046	-0.194	0.063
10235	-0.514	-1.746	-1.339	0.773	-1.77	0.69	-0.529	-2.065	0.944	-1.007	-0.617	-0.477	-0.577	-0.344	-1.591	-1.102	-1.497	0.135	-0.835	-0.674	0.731	-0.714	-0.791	1.305	-0.946	0.468	-0.771	-1.117	-0.853	1.845	-1.84	-0.562	-0.043	0.277	-0.048	-1.114	-0.819	-1.686	-1.72	-1.36	0.94	-0.758	-0.157	0.939	-0.427	0.004	-0.57	-1.532	-2.347
4643	-0.333	-1.499	-0.523	0.072	-0.595	0.065	-0.078	-0.643	-0.025	-0.297	0.209	-0.647	-1.525	-0.818	-1.949	0.681	-0.625	-1.296	0.883	-0.754	-0.168	-0.256	-0.966	-1.234	-0.777	-0.887	-0.403	-1.574	-0.157	-1.117	-0.171	0.292	-1.021	-0.685	0.142	-1.003	-0.839	0.504	-1.186	-0.47	-0.133	-1.456	-0.625	0.384	-0.181	-0.452	-0.53	-0.222	-0.212
25839	-0.475	0.4	0.709	-0.043	0.213	-0.353	-0.1	0.145	0.158	0.498	-0.573	0.693	-0.411	0.059	0.461	-1.098	-0.326	0.242	0.12	-0.606	0.109	0.435	0.678	0.172	-0.145	0.481	-0.135	0.707	0.076	1.002	-0.257	0.55	0.414	0.557	0.485	0.33	0.329	-0.233	0.109	-0.064	0.796	1.038	-0.128	-0.153	0.116	-0.504	0.175	-0.122	0.203
10743	-1.156	1.788	-1.231	1.023	0.304	0.37	-0.997	-0.164	1.536	0.373	0.413	-0.801	0.488	1.391	-0.768	1.398	0.599	0.726	0.483	0.281	-0.177	0.699	-0.037	-1.117	1.353	-0.099	0.757	-1.087	-1.259	-0.28	-0.018	0.548	0.6	0.902	1.344	-0.205	-0.103	-0.081	0.479	-0.88	-2.173	2.391	1.081	0.586	0.908	0.108	1.161	0.453	0.574
64849	1.566	4.263	1.375	0.906	-0.098	0.18	-2.21	-1.045	-1.966	-1.733	-0.436	3.471	-0.234	-0.738	1.538	-1.059	-1.477	1.176	-0.074	2.861	0.131	-0.874	3.18	-1.267	1.89	1.345	-0.783	4.053	2.664	4.683	-4.128	-1.721	1.419	-2.282	-0.814	0.295	3.375	-3.709	-2.163	-1.074	-2.14	2.051	0.012	-1.268	1.036	0.196	-1.984	2.085	-0.589
1303	0.745	-0.088	-0.853	-0.656	-0.561	1.57	-1.553	0.033	-1.317	-1.27	1.139	-0.451	0.769	0.249	-1.655	-1.074	-0.13	2.149	0.988	-2.109	0.577	0.344	0.779	-1.299	-2.527	-3.052	1.133	-2.703	-0.155	-1.148	-0.604	1.703	-0.313	1.415	-1.444	0.371	-2.636	-1.492	-0.797	-2.525	-3.648	-1.093	-0.961	-0.015	1.37	-0.016	-1.427	-0.649	0.094
27178	0.085	1.278	0.092	-1.263	0.225	-0.946	0.618	-0.081	0.005	0.056	0.185	0.033	-0.926	1.015	0.014	0.742	1.115	-0.527	0.175	0.195	-0.493	-0.311	-0.113	-0.098	-0.098	1.508	-0.954	1.38	0.165	1.136	0.537	-0.232	0.078	0.839	-0.131	0.039	0.658	1.616	0.226	0.986	-0.301	-0.5	-0.429	1.816	1.777	0.541	1.543	-0.365	-0.526
400629	0.029	-0.248	-0.325	0.06	0.071	0.146	0.194	-0.046	0.484	0.088	-0.711	0.083	0.448	0.152	0.098	-0.238	0.23	-0.265	-0.734	-0.148	-0.489	-0.522	-0.288	0.127	0.391	0.438	0.58	-0.051	-0.423	0.09	0.113	-0.254	0.014	-1.065	-0.143	-0.2	0.348	-0.029	-0.212	0.838	0.18	0.352	-0.357	-0.756	0.499	-0.458	-0.065	0	0.564
6536	2.812	2.62	0.932	0.422	-0.677	1.342	-0.059	2.931	1.528	2.488	2.549	-0.941	-0.652	0.214	2.206	0.733	0.877	0.586	1.66	-1.454	0.992	2.169	1.385	0.191	-0.124	0.363	0.469	3.372	-0.096	0.375	-0.706	1.273	2.223	1.834	2.471	0.189	1.146	-0.968	2.714	-0.642	-0.85	1.95	1.883	-0.494	1.813	0.151	2.284	3.242	1.296
84417	-0.976	-4.587	-4.109	-3.815	-3.976	0.22	-2.335	-2.859	-0.865	-2.385	-0.626	-1.471	-0.568	-0.728	-3.783	-2.829	-2.641	-0.481	-2.961	-2.481	-2.161	-3.499	-0.165	-2.471	-2.381	-2.093	-3.876	-4.393	-1.41	-1.973	-2.799	-0.74	-1.888	-3.404	-4.333	-1.567	-3.328	-4.264	-3.136	-2.299	-3.038	-3.946	-4.526	-2.254	-3.065	-1.44	-4.401	-0.809	-2.424
119467	-6.874	-8.322	-7.707	-0.099	-4.486	-3.06	-2.509	0.31	1.018	-5.25	-0.933	-5.891	-3.11	-2.079	-5.679	-3.217	-3.196	-7.528	-4.703	-6.155	0.288	-7.502	-2.752	-1.157	-5.875	-3.578	-4.727	-5.609	-2.163	-1.006	-8.098	1.006	-3.248	-1.786	-0.573	-6.268	-1.706	-1.256	-2.615	-1.049	0.885	-8.234	-6.73	-6.515	-2.688	-1.456	-7.692	-4.004	-8.137
8379	0.74	-1.547	-0.307	0.962	-0.1	-0.589	-0.02	-1.317	-0.035	-0.209	-1.247	-1.113	-1.829	0.368	-0.822	-1.223	-0.751	-0.95	-0.886	-1.053	-0.959	-0.791	-1.096	0.437	-0.903	0.46	-1.797	-0.442	-0.356	-0.507	-1.416	-0.867	-0.967	-0.405	0.317	-0.967	0.113	-1.061	-1.378	0.05	-0.411	0.159	-1.457	-0.206	-0.971	-0.273	-1.035	-0.372	-0.295
9725	-0.042	-0.645	0.497	-0.037	-0.372	0.51	0.492	-0.665	-0.724	1.422	-1.199	-0.788	0.012	-0.658	-1.112	-1.433	0.999	-0.494	-0.14	-1.923	0.234	-0.462	-1.018	-0.152	-0.571	0.744	-0.492	-0.651	0.204	-0.095	-0.944	0.012	-0.048	-0.539	-0.313	0.372	-0.44	-0.632	-1.473	-0.854	0.834	-0.141	0.259	0.828	-0.085	-0.03	-1.104	1.089	0.452
83544	-0.836	0.894	0.84	-0.461	-0.594	0.419	0.13	0.532	0.329	-0.331	0.193	0.354	0.104	0.563	-0.226	0.517	-0.291	0.047	0.587	0.818	0.7	0.942	0.331	1.196	-0.189	-0.147	-0.26	-0.904	0.529	0.25	0.75	-0.629	-0.13	-0.188	0.535	-0.566	-0.989	0.873	0.619	1.377	0.157	0.607	0.129	0.075	0.75	-0.415	-0.301	0.253	-0.667
197021	0.31	-0.134	1.014	-0.989	0.785	-0.069	1.728	1.671	0.622	0.697	0.96	0.955	1.26	0.134	1.141	1.974	0.566	0.491	1.757	1.635	0.866	2.059	1.467	1.864	0.56	0.768	1.024	0.11	-0.074	1.065	0.386	0.942	1.204	0.973	0.48	1.236	0.504	1.125	1.677	1.785	2.008	-0.408	0.954	0.814	0.109	0.889	0.224	0.369	-0.55
94103	-0.115	0.074	-1.029	0.338	0.548	-0.28	0.525	-0.666	0.122	0.419	-0.699	-0.208	0.348	0.113	0.605	-1.035	-0.316	-0.743	-1.739	-0.648	-0.695	-1.044	-0.9	0.438	-0.44	1.588	-0.847	1.086	-0.084	1.124	0.455	0.339	-0.256	-0.993	0.196	0.144	0.474	0.377	-1.416	-0.399	-0.716	-0.505	-1.243	0.677	-0.166	-0.052	-0.554	-0.276	-0.02
11178	-0.008	0.906	0.18	-0.588	0.019	1.203	-0.11	0.428	0.174	0.321	0.969	0.344	0.842	0.64	0.141	0.24	0.883	1.831	1.284	0.048	0.633	0.9	0.296	0.101	0.421	0.238	-0.064	-0.515	0.195	0.22	0.838	0.877	0.939	1.182	-0.458	0.918	-0.512	0.546	0.088	0.14	-0.514	0.447	0.193	0.474	2.315	0.746	0.276	0.353	0.898
51744	-1.051	-3.484	-2.904	-0.465	-0.793	-1.619	-4.038	-2.284	-2.276	-1.867	-0.876	-3.381	-3.353	-0.77	-0.807	-2.386	-2.98	-1.391	-3.267	0.435	-1.417	-3.031	-2.742	-1.888	-0.613	-1.944	-0.519	-3.122	-2.636	-0.955	-3.411	-2.113	-0.619	0.829	-3.105	-3.401	-0.596	-3.977	-2.008	-1.586	-0.566	-4.101	-2.293	-1.664	-1.587	-0.747	-0.269	-4.703	-3.949
85360	-0.08	0.599	-0.441	0.418	-1.34	0.526	-0.788	-1.906	-0.436	-0.725	-0.017	-0.805	-0.467	0.063	-1.41	1.521	-0.77	0.905	-0.084	0.025	-0.315	-0.671	-0.219	-0.596	-0.388	-0.096	-0.274	-0.206	-0.21	-0.736	-1.008	0.192	-0.238	0.154	0.006	0.428	-1.309	-0.736	-0.316	-0.904	-0.917	0.406	0.166	-0.108	0.47	-0.728	-0.567	-0.064	0.396
6556	-0.973	0.169	-1.265	-1.025	0	1.367	0.279	-1.979	-2.204	-0.922	1.56	-0.887	0.052	-2.4	-0.733	-0.359	1.409	-0.8	0.954	-1.167	-2.083	-0.324	-0.757	-1.223	-0.102	-2.216	2.756	-0.954	-1.535	-0.851	-0.095	-1.289	-0.777	-0.566	0.186	-2.057	-1.409	-1.832	-0.749	-1.589	-2.43	5.051	1.045	0.386	-0.647	-1.656	-0.414	-0.716	-1.119
57468	0.011	-0.006	-0.264	0.09	0.149	-0.123	-0.055	-0.217	0.355	0.483	-0.643	-0.104	-0.205	0.284	0.369	-0.113	-0.131	-0.215	-0.082	0.478	1.457	0.075	0.054	-0.228	-0.075	0.423	-0.455	0.26	0.123	0.339	0.096	0.112	-0.148	-0.227	-0.03	0.333	0.428	0.214	-0.171	-0.186	0.04	-0.411	-0.084	0.224	-0.178	0.075	0.257	-0.277	-0.369
5339	0.751	1.537	-0.375	1.159	-0.222	1.379	0.606	-0.289	0.048	0.56	0.243	-0.097	0.585	0.832	0.009	-0.768	1.303	0.082	1.418	-0.701	0.723	1.661	1.079	-0.486	0.115	0.668	-0.313	0.554	1.019	1.106	0.316	1.311	0.385	0.879	0.284	-0.454	-0.135	1.317	-0.555	0.273	-0.384	0.269	0.596	1.078	0.37	0.196	1.831	-0.021	0.755
283459	0.197	0.074	0.452	0.16	0.254	-0.415	0.359	0.586	0.831	-0.234	-0.344	0.067	-0.422	-0.385	0.094	0.059	0.262	-0.246	0.633	0.152	-0.319	0.187	-0.406	-0.155	0.308	0.317	-0.122	0.416	-0.506	-0.069	0.484	-0.697	-0.633	-0.844	-0.366	-0.481	0.258	0.088	-0.443	0.381	0.951	-0.275	-0.056	-0.18	-0.114	-0.604	0.152	-0.02	0.034
84957	0.146	0.185	-0.513	0.137	0.037	0.321	-1.066	0.404	-1.276	0.424	0.537	-1.568	-0.148	-1.261	-0.284	-0.312	0.845	0.198	-0.325	-0.273	0.53	-0.361	-0.461	-0.951	0.06	-0.315	0.764	-0.802	-0.335	-0.494	-0.379	-0.355	0.507	0.726	-0.284	-0.547	-0.459	-0.832	0.353	-0.953	-0.79	-0.187	2.297	-0.005	0.371	0.796	0.399	-0.288	0.107
8546	0.082	0.655	1.636	0.143	0.635	0.606	0.339	-0.305	0.759	0.499	0.75	0.063	0.677	0.728	0.762	0.413	0.471	0.645	0.755	1.26	0.701	0.53	0.373	0.11	0.817	0.002	0.697	0.996	0.925	0.343	0.532	0.402	0.528	0.434	0.218	0.264	0.75	1.153	0.678	0.485	0.743	-1.071	0.843	-0.005	0.649	0.745	1.045	0.3	1.232
79370	1.449	0.881	-0.878	-0.051	2.458	1.207	-1.094	1.212	1.804	-1.146	0.878	-0.772	1.733	1.42	-0.746	0.715	0.056	1.965	-1.076	2.297	2.031	-1.537	-1.134	-0.71	2.073	-0.497	1.181	0.02	-1.65	-0.256	-0.341	1.133	1.408	1.568	-0.302	3.122	0.604	-1.292	0.945	0.582	-0.735	-1.146	0.951	0.392	-0.41	-0.143	0.065	0.842	1.828
2185	-1.034	-0.352	-1.158	-0.267	-1.798	1.001	0.181	-0.349	-0.505	1.044	0.562	-0.204	-0.729	0.089	-0.362	0.435	-0.918	-0.119	-0.478	-0.856	0.73	-1.823	-0.409	-0.288	-0.429	1.253	0.442	0	-0.699	-0.665	-1.034	0.217	-0.148	1.727	-0.731	-0.667	-0.404	-1.662	-0.582	-1.556	-1.651	-1.745	-1.097	0.966	-0.522	0.758	0.561	-1.201	-1.244
166752	0.002	0.132	0.002	0.744	0	-0.135	0.559	0.274	0.153	0.087	-0.384	0.328	-0.49	-0.027	0.2	-0.203	-0.196	-0.472	-0.175	-0.491	0.225	0.013	-0.278	-0.102	0.641	-0.069	0.382	0.317	0.371	0.073	-0.139	-0.072	-0.4	-0.053	-0.117	-0.612	-0.118	-0.22	0.066	-0.038	0.105	0.248	-0.188	-0.083	-0.93	-0.032	-0.344	0.203	0.368
3459	-0.783	0.051	-0.295	-0.503	-0.976	0.151	-0.988	-0.097	-0.786	-0.053	0.204	-0.162	-0.66	0.34	-0.077	-1.058	0.076	-0.303	-1.642	-0.083	0.446	-0.882	0.12	-0.788	-0.389	-0.977	0.448	0.797	0.265	0.424	-0.134	-0.153	-0.13	0.299	-0.628	-0.984	0.713	-0.554	-1.812	-1.249	-0.682	-0.371	-0.539	-0.396	0.442	-0.156	-0.25	-0.533	-0.115
222194	0.126	-0.031	0.089	-0.167	0.177	-0.234	-0.011	0.516	0.416	1	0.036	0.689	0.389	0.879	-0.147	0.318	0.488	0.046	-0.001	-0.474	0.703	-0.154	-0.164	-0.518	0.11	0.445	-0.117	-0.166	0.311	-1.043	-0.032	0.431	0.023	0.864	-0.947	-0.381	0.404	0.268	0.961	-0.059	0.268	0.249	-0.371	0.405	0.01	0.007	0.748	0.384	0.986
4604	1.301	0.455	2.072	0.997	-0.923	1.688	-0.327	6.524	2.771	-0.113	1.61	0.315	0.318	-0.118	0.475	3.484	2.822	-0.58	1.25	0.211	2.149	0.363	0.926	0.39	-0.242	0.173	0.243	1.033	0.204	2.124	0.518	0.353	-0.198	1.004	0.893	2.258	5.613	1.094	4.524	0.81	2.685	-0.174	0.003	2.819	0.398	0.449	2.118	1.362	1.216
283638	-0.24	0.613	0	0.383	0.865	-0.418	0.024	-0.359	0.707	1.035	0.166	-0.164	0.38	0.19	0.252	0.246	0.37	0.861	0.421	0.829	-0.288	0.587	0.137	0.214	-0.172	0.827	-0.149	0.15	0.092	0.714	0.554	-0.427	-0.434	0.017	0.414	-0.314	-0.255	0.319	0.005	-0.271	-0.372	0.729	0.429	0.99	0.643	-0.366	0.529	0.554	0.243
8832	0.049	-0.642	-0.646	-0.537	-1.03	0.548	-0.634	-0.076	-1.933	-0.337	0.707	-2.577	-1.131	-0.607	-0.103	0.342	-0.92	0.387	-0.943	0.436	0.439	-0.395	-0.539	-0.679	-0.478	-0.227	0.843	-0.978	-0.896	-0.588	-1.155	-0.939	0.134	1.261	-1.833	-1.434	-0.204	-0.6	0.248	-0.519	-2.916	-1.175	0.502	-0.749	-0.527	0.555	2.01	-2.621	-1.39
9104	-0.419	-0.965	-0.742	-0.064	-0.945	-0.665	0.074	-0.938	-0.13	-0.855	-0.737	0.085	-0.559	-0.308	0.003	-0.557	-1.426	-0.455	-3.24	-0.258	-0.792	-0.932	-0.3	-0.034	-2.741	-0.116	-2.357	-0.511	0.014	-0.244	-0.583	0.014	-1.55	-0.858	-1.092	-0.461	-0.029	-0.746	-0.662	-0.259	-0.112	-3.767	-2.721	-0.61	-0.36	-0.454	-1.666	-1.589	-0.752
653121	0.37	-0.045	1.229	-2.128	0.418	-0.22	0.084	0.915	0.409	1.072	0.462	1.952	-0.802	1.241	0.553	0.469	-1.02	-2.006	0.519	0.599	-0.438	1.823	0.768	1.457	0.406	-0.869	-0.269	0.83	1.111	0.727	1.322	-2.162	0.711	-1.557	0.33	-1.223	0.285	0.747	2.13	2.856	1.103	-1.088	0.334	-1.042	-0.276	0.085	-1.462	1.604	-0.822
5338	-0.383	0.698	-0.454	0.552	-0.806	0.508	-0.655	0.368	0.071	-0.194	0.183	-1.228	-0.63	0.007	-0.493	0.14	0.283	1.206	0.816	0.173	-0.201	0.096	-0.198	-0.388	-0.452	-0.209	0.581	-0.398	0.488	-0.2	-0.592	0.943	0.116	0.25	-0.264	0.042	-0.279	-0.35	0.155	-0.358	-0.176	0.271	0.471	0.317	0.749	-0.423	0.72	0.408	1.222
5439	0.374	0.074	-0.23	1.16	0.612	-0.116	0.36	0.346	0.637	1.255	-0.31	0.403	0.297	-0.528	0.665	-0.537	0.823	-0.234	0.114	-0.466	-0.643	-0.486	-0.197	0.226	-0.246	0.63	-0.266	0.005	-0.432	0.051	-0.344	-0.217	0.021	0.101	-0.196	0.093	0.567	-0.835	-0.182	0.022	-0.56	0.4	-0.225	0.485	-0.234	-0.185	-0.008	1.014	0.825
10211	0.142	0.347	-0.085	-0.519	0.51	0.359	-0.171	0.248	-0.582	0.503	0.884	-1.212	0.647	-0.06	0.504	-0.528	0.956	0.062	-0.074	-0.375	0.249	0.725	0.571	-0.687	0.211	0.665	0.616	-0.371	0.617	-0.401	0.495	-0.193	0.86	-0.189	-0.23	-0.14	-0.436	-0.506	0.192	-0.577	-0.551	1.707	1.072	0.181	0.078	-0.733	-0.07	1.052	0.319
170482	-0.367	-1.764	-0.316	-1.872	-2.578	0.846	-0.476	-2.489	-0.56	0.056	0.798	-1.872	-0.577	-1.787	0.469	-0.784	-2.112	-1.23	-1.804	-0.989	-0.443	-0.894	-1.284	-0.691	-1.922	-0.379	0.005	-0.881	-1.316	-2.241	-1.061	-0.459	-0.511	-0.314	-0.72	-0.691	-2.009	-0.701	-0.612	-1.961	-0.93	-0.466	-2.264	-0.524	-0.842	0.55	-0.576	-2.412	-0.449
64789	0.661	0.513	0.88	-1.598	-0.024	-0.258	1.624	2.329	1.433	1.399	-0.828	0.031	0.034	0.552	1.432	0.589	1.203	0.596	1.16	0.882	0.528	0.96	1.219	2.124	0.592	0.349	0.111	0.18	1.072	-0.032	0.951	0.345	0.694	0.724	0.418	0.318	0.486	1.182	1.025	1.687	1.509	0.643	0.121	0.524	0.341	0.33	0.246	1.584	0.091
138199	0.026	-0.718	0.292	0.089	0.733	-0.803	0.089	-0.097	-0.173	-0.548	-0.347	0.294	-0.25	-0.654	0.206	0.146	-0.106	-0.218	0.119	-0.201	-0.01	0.366	-0.503	0.323	0.375	-0.923	0.443	0.273	-0.719	-0.122	0.179	-0.58	-0.631	-0.437	0.021	-0.807	0.323	0.071	0.365	0.768	-0.029	0.474	-0.341	-0.439	-0.684	-0.333	-0.2	-0.929	-1.554
83992	1.586	-2.879	-2.184	1.464	-2.689	-1.48	-2.891	-2.486	-2.867	-2.999	-0.842	-1.703	-2.182	-2.244	1.905	0.754	-3.609	-3.056	-3.064	-2.047	0.313	-1.987	-1.208	-0.461	-3.003	-2.108	-1.144	-0.455	-2.602	-2.616	-3.206	0.536	-0.838	-4.049	-3.513	-2.559	-0.967	-3.558	-2.044	-1.77	-3.022	-0.883	-1.119	-4.192	-1.011	-2.064	1.977	-2.04	-2.804
145195	-0.13	-0.169	-0.191	-0.529	0.205	-0.103	0.219	-0.366	-0.162	-0.007	-0.237	0.248	-0.102	0.104	-0.275	-0.451	0.051	0.017	-0.27	-0.215	-0.778	-0.325	-0.431	-0.008	0.008	0.204	0.109	0.778	-0.381	0.154	0.2	-0.327	-0.411	-0.046	-0.445	-0.056	0.176	-0.053	-0.102	0.503	0.182	0.015	0.046	-0.854	0.127	0.22	-0.053	-0.373	0.243
284513	0.903	2.89	0.945	-3.174	-0.066	1.478	1.8	2.045	0.875	1.599	1.779	2.181	0.492	2.191	-0.216	0.858	2.257	1.536	1.197	-0.366	1.464	1.194	1.55	1.968	0.511	3.156	1.53	1.483	-0.718	0.159	2.25	0.779	1.845	3.286	1.584	0.931	0.415	1.527	1.604	1.356	2.551	3.983	2.141	2.102	2.981	2.263	1.476	1.251	0.848
116159	1.333	-2.775	-0.29	-0.341	-1.586	0.567	-0.349	-0.458	-1.9	-0.321	0.357	0.333	0.444	-0.005	-0.174	-0.285	-1.874	0.115	-0.399	1.93	0.481	0.659	0.254	0.557	-0.842	0.038	-0.303	-1.354	-0.041	-0.251	-1.845	1.099	0.503	0.781	-2.428	-0.757	-0.354	-0.765	0.41	0.338	-1.006	-2.907	-1.424	0.254	0.629	0.832	-0.345	-0.347	0.305
55236	-0.52	-1.182	-0.338	-0.594	0.7	-0.44	-0.385	0.234	-1.06	0.276	-0.063	0.594	-0.903	-0.88	-0.807	-0.204	-0.021	-0.437	-1.195	-0.157	0.495	-0.311	-0.57	1.394	-0.521	-0.373	0.554	-0.151	-0.097	-0.728	-0.709	0.227	0.285	-0.072	-1.002	-1.024	0.299	-1.144	0.878	-0.699	-0.211	-0.397	0.015	-0.987	0.129	-0.953	0.078	0.046	-0.457
10724	-0.706	-0.764	-0.145	0.786	-0.557	-0.105	-0.936	-0.917	-0.173	-0.451	-0.348	0.131	0.453	-0.385	-0.069	0.377	-0.589	-0.151	-0.173	0.191	0.176	0.032	-0.221	-1.141	-0.333	-0.719	0.792	0.239	-0.136	-1.23	-0.489	0.841	-0.164	0.669	-0.195	-0.387	0.121	-1.449	0.393	-0.145	-0.641	-0.341	0.023	-0.845	0.208	0.75	0.023	-0.047	0.364
143678	-0.239	0.19	0.156	1.065	0.228	-0.641	0.346	-0.772	0.576	0.099	-0.584	0.068	-0.164	-0.172	-0.294	-0.192	-0.133	-0.365	0.123	0.108	-0.16	-0.13	-0.097	0.186	0.626	0.248	-0.347	0.648	-0.26	0.204	-0.293	-0.411	-0.673	-0.098	-0.219	-0.405	0.001	0.315	-0.71	0.324	-0.099	0.093	0.125	0.125	-0.474	-0.537	0.136	-0.438	-0.069
5008	0.611	-0.498	-1.542	0.756	-0.226	-0.552	-1.245	0.109	-3.189	-0.442	1.587	-0.715	-0.301	-3.426	-0.531	-1.74	-0.918	-0.332	0.907	-0.531	0.462	-0.78	-1.39	-0.197	-0.176	-1.759	1.166	-1.705	-1.192	-1.079	-1.68	-1.011	0.002	-1.486	-3.847	-0.942	-3.117	-2.117	0.782	-0.62	-2.065	-1.739	0.372	-0.579	-1.861	-0.45	-0.327	-0.663	-1.192
474	0.011	0.096	-0.344	0.142	-0.04	-0.563	-0.159	-0.423	-0.103	-0.075	-0.414	-0.237	-0.824	-0.271	0.427	-0.361	-0.075	-0.078	0.04	-0.094	-0.105	-0.153	-0.412	0.098	0.207	0.564	-0.242	-0.302	-0.159	0.105	-0.196	-0.405	-0.501	-0.491	-0.579	-0.036	0.248	-0.187	-0.22	-0.095	-0.296	-0.037	0.048	-0.15	-0.249	-0.192	0.121	-0.3	-0.264
6279	-1.696	-2.838	-1.936	-1.341	-1.317	-0.648	0.174	-1.222	-3.594	-1.834	0.833	-1.818	-2.767	-1.391	0.207	-0.185	-1.199	-2.997	-4.623	-1.671	-2.311	-1.305	-2.734	-1.618	-1.153	-1.339	-0.066	-2.114	-2.159	-0.843	-3.419	-1.952	-1.429	-2.189	-3.126	-3.26	-2.83	-4.333	-2.036	-0.691	1.636	2.757	-0.731	-0.95	-1.831	-3.88	-1.243	-0.754	-4.453
195827	-1.188	-0.021	-0.404	-0.678	-0.227	0.237	-0.788	0.312	-0.188	0.817	0.647	-0.129	-0.856	0.215	1.27	-0.927	0.213	-0.541	-0.66	0.747	-0.19	1.288	0.223	-0.915	-0.427	-0.954	0.928	0.306	-0.423	0.18	1.009	-1.712	-0.617	-0.137	0.324	-1.496	0.436	-0.167	-0.624	0.542	-0.643	-1.984	0.449	-0.556	0.786	0.18	0.824	-0.208	-0.542
54536	0.072	0.192	0.534	0.297	0.628	0.322	-0.776	0.212	-0.028	0.162	0.89	0.1	1.341	-0.054	0.086	1.083	-0.059	0.401	0.648	1.113	1.018	0.946	0.314	-0.603	0.589	-0.164	0.708	0.298	0.362	-0.526	0.654	0.429	0.852	-0.317	0.361	0.632	0.155	0.155	0.604	0.804	-0.4	0.189	0.934	-0.063	0.694	-0.353	-0.415	1.07	0.911
8663	0.06	0.49	1.173	0.773	-0.181	0.268	0.309	-0.37	0.153	0.589	-0.97	0.927	-0.144	0.406	0.502	-0.272	-0.475	-0.854	-0.357	0.163	0.227	0.151	1.956	-0.749	-0.311	0.946	-0.999	0.576	-0.662	0.623	0.247	-0.952	0.82	0.387	0.362	0.463	0.783	0.496	-0.528	-1.14	0.795	0.036	-0.083	0.343	-0.539	-1.407	0.873	-0.936	0.785
10962	3.078	-0.35	-1.079	2.111	-1.316	1.713	0.346	4.244	-0.687	-0.217	0.487	0.152	-0.274	-0.11	-2.587	2.251	0.67	-0.143	1.199	-0.542	0.021	1.918	0.021	-0.252	1.048	-0.486	1.586	0.524	-1.008	-0.664	0.221	0.286	-0.316	1.018	2.308	0.366	-1.099	-0.386	3.128	3.721	0.802	-1.441	0.642	2.849	0.406	-0.453	-1.922	2.38	-0.302
643517	0.867	-0.064	0.129	-0.671	-0.066	0.633	0.18	-0.327	0.577	-0.283	-1.387	1.328	-0.423	0.911	-0.068	1.141	-0.884	1.084	0.985	0.874	-0.393	0.131	0.144	1.121	0.922	0.673	-0.961	-0.38	0.128	3.075	-1.3	0.15	-0.026	0.825	2.142	-0.004	0.471	0.03	0.968	0.429	-1.017	2.89	0.097	0.783	0.489	-0.567	0.986	-0.043	1.388
25884	-0.16	-2.067	-0.895	0.452	-2.412	0.793	-2.837	-1.483	-4.539	-1.704	0.796	-3.178	-1.006	-1.507	-0.724	-0.682	0.641	-2.122	1.603	0.007	0.405	0.234	-1.338	-2.888	-1.04	-1.26	-0.909	-0.136	-1.099	0.179	1.686	1.332	0.061	-1.591	2.159	-3.027	-1.121	-0.883	-2.625	-1.646	-3.191	1.481	2.963	-2.526	2.562	0.551	0.271	2.248	0.602
375248	-0.473	1.488	1.189	-0.066	-0.107	0.872	-1.267	0.187	0.596	0.61	1.339	1.086	1.317	0.09	0.683	1.775	-0.34	2.093	-0.588	1.431	1.281	-0.242	-0.072	0.897	0.115	-0.485	0.908	0.318	0.681	-1.605	0.472	2.09	0.602	2.146	1.424	0.816	-0.985	1.39	0.82	-1.207	1.176	2.133	1.663	0.62	0.65	1.502	-0.011	0.606	1.09
4018	-4.396	-5.034	-3.562	0.996	-3.179	-5.216	-0.232	-1.22	-3.071	-4.548	-2.077	-4.402	0.166	-0.392	-3.582	-3.922	-4.869	-2.317	-4.878	-0.538	-0.695	-5.534	-3.676	-1.866	-2.039	-5.378	-3.911	-2.582	-3.875	-3.662	-3.738	-1.21	-3.609	-2.245	-2.097	0.339	-0.002	-3.327	-2.043	-0.363	0.707	-6.286	-4.67	-0.266	-5.199	-2.918	-3.972	-3.33	-4.155
389649	0.02	-0.133	-0.014	-0.607	0.108	-0.531	0.145	-0.539	-0.384	0.15	-0.126	0.346	0.011	-0.131	0.409	0.263	-0.525	-0.469	-0.44	-0.011	-0.413	-0.406	-0.163	0.149	0.076	0.488	0.155	-0.369	0.186	0.356	0.268	-0.44	0.255	-0.22	-0.118	0.434	-0.012	-0.129	0.028	-0.102	0.127	0.477	-0.337	-0.132	0.135	-0.343	-0.039	-0.059	0.286
9786	-0.939	1.225	0.559	-0.265	0.307	-0.374	0.125	0.542	-0.833	0.209	0.176	0.497	-0.127	0.957	0.051	-0.075	-0.143	-0.28	-0.455	0.549	0.067	0.307	0.221	0.184	0.857	0.515	0.799	0.233	1.169	0.525	0.466	-0.16	1.165	-0.04	0.914	0.863	-0.017	0.82	-1.248	-1.507	-0.27	0.053	-0.713	0.867	-0.08	-0.982	-0.001	1.254	-0.045
84934	0.678	-0.133	0.814	1.033	-0.311	0.548	1.674	-0.099	1.579	-1.454	-0.349	-0.52	-0.69	-0.386	-0.709	-0.786	1.296	-0.853	0.634	-0.518	-0.033	-0.339	-0.065	-0.686	-0.995	0.378	-0.438	0.461	-0.879	1.374	0.437	0.542	-1.146	-0.73	0.61	-0.469	0.35	0.245	-0.788	-0.48	0.995	1.165	-0.238	0.414	-0.46	-0.585	0.335	0.419	0.518
8576	0.15	-0.242	0.045	0.363	-0.746	-0.066	1.477	-0.456	0.334	0.119	-0.784	0.258	-0.385	0.293	0.428	-1.092	-0.1	-1.099	-0.02	-0.016	-0.415	-0.094	0.259	0.33	-0.252	0.122	-0.915	0.586	-0.075	0.761	-0.209	-0.157	-0.127	-0.995	-0.118	-0.208	0.959	0.216	-0.598	0.304	-0.72	-0.346	-0.349	-0.147	-0.608	-0.158	0.194	-0.617	0.159
54676	0.934	1.228	1.657	0.45	1.532	0.861	0.478	0.352	0.297	-0.066	1.167	0.495	0.925	0.58	0.005	1.065	1.228	0.932	0.869	-0.24	0.399	1.219	0.421	0.212	0.997	0.671	1.523	-0.502	1.004	-0.287	2.268	0.786	0.872	1.037	1.765	0.451	0.535	0.478	1.085	0.017	0.502	2.352	1.752	0.466	1.504	0.027	0.706	1.472	1.09
9055	2.762	3.45	4.356	1.249	2.648	2.255	3.262	3.005	2.262	2.221	2.832	2.463	2.196	2.29	2.86	4.151	4.047	2.255	3.832	3.42	2.791	2.723	2.543	2.64	3.322	2.439	3.462	1.211	2.402	1.118	2.851	2.207	2.842	3.145	2.657	2.698	1.948	3.184	3.474	3.411	2.092	2.186	3.491	1.409	1.885	3.248	2.128	2.194	3.755
58531	-0.044	-0.28	0.054	0.25	0.222	-0.228	-0.038	-0.647	0.179	0.213	-0.525	0.174	-0.111	0.038	0.787	0.079	0.001	-0.454	0.288	0.071	-0.374	0.021	-0.378	0.307	0.111	0.494	-0.591	0.757	0.066	0.423	-0.096	-0.609	-0.022	-0.302	-0.049	-0.202	0.228	0.458	-0.212	0.379	-0.128	0.307	-0.226	-0.085	-0.332	-0.96	-0.343	0.343	-0.056
5210	0.222	3.822	-0.393	-0.201	0.637	0.603	-0.075	0.161	0.735	-0.681	0.601	-0.957	0.409	-0.7	0.696	0.292	3.86	0.658	2.987	1.253	0.311	-0.501	0.468	-0.438	1.43	0.827	2.363	0.527	-0.519	-0.375	1.517	-0.143	0.924	0.458	0.595	-0.602	0.271	1.33	3.169	0.369	1.397	3.561	2.32	1.998	1.393	0.178	2.305	0.274	0.213
642236	-0.045	0.03	0.902	0.435	0.581	0.472	0.819	0.775	-0.412	0.465	0.374	-0.235	-0.243	-0.031	0.892	0.114	0.882	0.142	2.229	-0.513	0.576	0.143	-0.339	-0.313	1.706	-0.869	0.483	0.968	0.019	-0.314	-0.222	1.359	0.616	0.57	-0.01	-0.559	1.205	-2.243	1.482	0.743	2.53	2.934	1.284	1.097	0.553	1.456	-0.236	0.445	-0.082
1160	-0.959	-1.551	-2.337	-1.461	-1.842	2.508	0.051	-1.266	2.171	0.099	0.018	-1.09	-0.248	-1.055	-2.718	-1.494	-1.328	-0.603	-0.231	-2.663	-0.825	-0.312	-0.712	-1.489	-1.873	0.791	-2.131	-3.865	-1.733	-1.246	-1.802	-1.355	-0.881	1.823	5.739	-0.116	-3.205	0.093	0.711	-0.448	-2.294	-0.37	-1.399	-0.505	-0.511	-0.368	-2.292	2.901	0.332
260436	0.206	0.184	1.649	1.095	-0.842	5.518	0.272	0.535	-0.12	0.45	7.62	0.428	1.29	1.26	-2.54	-2.406	4.196	-0.251	0.177	-0.483	5.068	0.359	0.01	0.05	-0.799	0.271	5.825	0.209	1.614	0.234	0.042	-0.397	-0.524	0.25	0.604	0.301	4.12	-0.648	1.071	-0.294	0.058	0.272	1.246	-1.122	3.775	4.418	1.268	6.322	1.117
283601	-0.398	0.149	-0.168	-0.122	0.064	0.047	0.147	0.075	0.128	1.054	-0.576	0.226	0.216	-0.101	0.25	0.073	-0.07	-0.264	-0.414	0.213	-0.53	-0.068	-0.073	0.214	0.132	0.428	0.112	0.533	-0.138	0.028	-0.024	-0.641	-0.084	-0.411	0.2	-0.314	0.314	0.028	-0.28	0.031	-0.068	-0.217	-0.213	-0.411	-0.223	-0.207	-0.264	0.065	-0.136
9086	-0.086	-0.382	0.704	-0.206	1.212	-1.659	-4.139	0.196	0.359	-0.391	-0.205	-0.243	-2.477	-0.866	-2.894	-3.67	0.109	0.039	-3.958	0.461	0.141	-0.196	0.402	0.075	0.234	-0.213	0.039	0.089	-0.571	0.156	0.247	-0.487	-0.054	-0.171	0.002	0.021	-0.429	0.113	0.481	-3.767	0.847	-0.055	-0.739	-3.523	-2.095	-2.054	-0.566	-0.362	-0.488
326343	-1.458	-2.604	-1.516	-0.643	-1.048	-0.977	-0.75	-1.706	-0.994	-1.162	-0.273	-2.227	-1.655	-1.701	-0.664	-0.683	-0.87	-0.18	-3.31	1.432	-0.603	-2.411	-0.322	-0.665	-1.033	-2.842	-0.873	-0.799	-0.822	-1.369	-0.06	-2.067	-0.901	-1.071	-1.245	-0.403	-0.44	-1.119	-1.808	-0.967	-1.514	0.185	-1.028	-0.71	-1.782	-1.069	-1.418	-0.838	-1.535
474381	-0.118	0.281	0.426	-0.448	0.049	0.127	0.193	-0.114	0.123	0.338	0.651	0.217	-0.074	0.109	0.058	-0.189	0.413	0.067	0.012	0.199	-0.422	0.013	-0.425	0.263	0.714	1.448	-0.255	-0.291	0.274	0.553	0.385	0.016	-0.173	0.398	-0.132	0.609	-0.011	0.376	0.013	0.236	-0.32	2.515	0.075	-0.463	0.752	-0.179	-0.233	0.056	-0.038
389676	-0.148	-0.326	1.359	0.114	0.025	-0.252	-0.247	0.225	0.326	-0.453	-0.177	0.313	-0.022	-0.175	0.104	-0.484	-0.041	-0.485	0.156	0.013	-0.454	-0.494	-0.333	0.386	0.199	-0.332	-0.105	0.627	-0.476	0.356	0.109	-0.23	-0.195	-0.05	-0.128	-0.337	0.423	0.262	-0.178	0.439	-0.146	3.778	-0.328	-0.364	-0.504	-0.737	-0.525	-0.046	-0.178
56477	3.496	2.203	-0.056	-1.626	0.101	-0.085	-1.576	0.873	0.502	0.763	1.504	-2.325	0.199	-0.268	-0.912	1.715	1.552	-1.146	1.159	-0.891	-0.764	1.21	0.567	0.016	-0.116	-2.522	-0.55	-0.932	0.288	-1.249	0.376	-1.473	-1.201	-0.579	1.305	-1.672	-1.212	0.575	-0.463	0.215	-0.985	1.734	1.884	0.676	-1.233	-0.537	0.433	2.617	0.965
83607	0.151	0.218	-0.806	0.371	-0.588	0	0.444	0.544	0.643	0.135	-0.06	-0.531	-0.011	0.679	0.587	1.12	0.431	0.357	0.174	0.493	-0.203	0.424	-0.507	0.321	0.052	-0.097	0.149	0.291	0.605	0.107	0.402	0.289	0.369	0.22	0.779	1.158	0.192	0.7	0.058	0.487	-0.289	0.448	0.47	0.915	0.377	0.038	-0.217	0.903	-0.375
29781	1.212	1.231	0.938	0.203	0.658	0.321	1.446	-0.139	0.616	0.539	0.215	0.441	0.381	0.405	0.704	1.353	1.09	0.453	0.539	0.482	0.272	0.003	0.72	-0.266	1.741	0.818	1.139	0.634	0.954	0.5	0.238	0.304	1.352	0.721	0.872	0.928	0.21	0.526	0.176	0.001	-0.075	1.268	1.12	0.729	-0.555	-0.192	0.226	0.888	1.374
50861	0.06	0.143	-0.665	-0.952	0.244	2.916	-1.353	-0.046	2.337	0.612	1.367	-1.002	1.933	-0.609	-1.762	-0.373	-0.178	3.21	-0.718	1.219	0.936	-0.128	-0.153	-0.738	2.183	-0.335	0.059	-1.394	-0.035	-0.784	-1.11	0.354	-0.407	1.645	0.514	-0.248	-1.085	0.875	-0.583	-0.827	-2.588	-0.547	0.043	0.505	0.642	0.429	0.504	-1.59	1.981
5819	-0.43	0.668	-0.795	0.737	0.4	0.856	-0.274	0.389	0.415	0.739	0.222	-1.041	0.633	0.1	-0.641	-1.268	0.316	0.246	-0.908	0.412	0.302	0.182	-0.861	-0.212	2.204	0.165	0.681	-0.73	0.153	-0.749	-0.072	1.01	0.445	-0.612	0.183	0.632	0.039	0.194	0.291	0.063	-0.519	0.847	0.128	0.755	-0.138	-0.04	-1.151	0.779	1.496
7535	-0.08	-0.273	-1.464	0.655	-1.225	0.794	-0.998	-0.636	-1.386	-0.454	0.54	-0.851	-0.22	-0.735	-1.055	-0.868	-1.145	0.101	-0.809	-1.693	1.053	-0.894	-0.753	-0.436	-0.687	-0.327	0.216	-1.171	-1.224	-0.505	-1.715	0.62	-0.028	2.867	-0.835	-1.611	-0.468	-0.72	-0.308	-2.362	-0.93	0.381	-0.624	-0.034	0.011	0.704	-0.06	-1.273	-0.004
984	-0.675	-0.463	-0.346	-0.425	-0.47	0.482	1.157	0.441	0.253	1.246	-0.066	0.206	-0.544	-0.065	-0.222	-0.072	0.93	-0.804	0.324	-0.475	-0.361	0.338	-0.491	0.354	0.19	0.872	0.442	0.819	1.131	0.48	0.691	-0.362	0.43	0.353	-0.442	-0.024	-0.66	-0.296	-0.905	0.218	0.208	0.005	0.355	0.256	0.259	-0.094	-0.464	0.275	-0.536
23177	1.617	1.39	0.308	-0.097	-0.039	0.636	-0.53	0.083	-0.052	0.38	0.638	0.963	0.947	0.492	1.072	0.787	-0.332	1.348	2.106	1.257	0.936	0.58	1.388	0.431	-0.215	0.238	0.856	-0.171	0.891	0.501	-0.038	0.531	0.751	0.71	0.824	0.435	-0.19	0.733	0.863	1.253	-0.821	0.893	0.644	0.72	0.7	0.466	0.099	0.239	0.828
7069	1.853	-2.994	0.477	0.817	-3.821	-3.478	2.612	-0.48	-6.541	1.998	-2.096	-0.331	-6.129	-4.465	-6.267	-7.516	0.975	-7.716	3.366	-7.672	-1.907	-4.538	-3.523	0.489	-8.234	0.378	-6.983	-3.944	-6.808	-0.376	-4.66	1.76	-5.64	-0.366	-6.588	-3.544	-0.946	-5.425	-3.984	1.381	-1.14	-4.394	-4.381	-0.629	-7.411	1.7	-5.305	-0.278	-8.054
7038	0.198	1.98	0.466	1.092	-0.68	0.867	-0.162	-0.359	-0.02	0.215	0.228	3.314	-0.026	0.492	0.623	-0.361	-0.009	0.419	0.035	0.186	-0.661	-0.355	1.236	1.999	0.281	2.249	0.277	0.965	0.629	1.986	-0.129	0.955	1.956	0.132	0.46	1.119	-0.41	0.511	-0.616	0.061	-0.931	0.32	0.73	1.157	0.748	0.721	0.059	-0.54	-0.153
53841	-0.711	-0.018	-2.311	0.707	-1.695	-1.287	-0.28	-0.447	1.3	-0.328	-1.992	0.598	-2.187	-0.254	-2.17	0.362	-0.441	-2.475	-2.944	-2.351	-1.287	-4.238	-0.163	0.623	-1.746	1.488	-2.422	0.657	-1.185	0.622	-0.467	-0.395	-0.912	-2.233	-0.099	-1.716	1.521	-1.595	0.305	-0.225	-2.731	-1.972	-1.956	0.787	-4.69	-0.497	-0.009	0.582	-0.497
80700	-0.869	-0.073	-0.173	0.364	0.115	-0.069	0.654	-0.519	0.351	0.74	-0.484	-0.17	0.009	-0.003	0.615	0.081	-0.041	0.065	-0.172	0.415	-0.507	-0.795	-0.023	0.356	0.359	0.697	-0.543	0.961	0.192	0.111	-0.455	-0.087	0.311	-0.554	0.597	0.668	0.477	-0.57	-0.653	-0.125	0.837	0.293	0.69	0.155	-0.7	0.2	-0.023	0.206	0.221
57007	-0.323	-0.785	-0.668	-3.563	-0.338	2.482	-0.914	1.248	0.152	1.917	1.183	-1.888	-0.569	-1.078	-0.574	-1.112	0.752	1.022	-1.45	0	0.51	0.931	-0.924	0.329	0.453	-1.048	-0.241	-0.936	0.941	-0.389	0.305	-2.077	0.527	0.192	-2.56	-1.1	-0.912	0.023	-2.008	0.211	0.084	-2.569	0.606	1.636	0.524	-1.079	-1.537	1.545	-0.356
441876	-0.08	-0.049	-0.266	0.708	0.219	-0.453	-0.006	-0.644	-0.338	-0.168	-0.57	0.047	-0.13	-0.376	0.238	-0.105	-0.372	0.018	-0.371	0.328	-0.303	0.328	-0.677	0.23	0.175	-0.075	0.041	0.11	-0.626	-0.252	0.417	-0.839	-0.679	-0.113	0.033	-0.326	0.198	-0.208	-0.207	0.14	0.004	0.126	0.206	-0.48	-0.251	-0.57	-0.235	-0.159	-0.04
171392	-0.702	0.775	1.482	-0.241	0.473	0.832	0.983	-0.133	0.311	-0.751	0.785	-0.608	1.241	-0.155	1.146	1.003	1.11	0.871	2.333	1.371	1.17	1.332	1.116	1.629	0.615	0.825	0.906	-2.592	1.532	-0.621	-0.589	1.842	0.929	1.926	-1.361	0.444	0.226	0.871	2.526	0.671	0.964	3.101	-0.635	1.044	0.864	1.273	0.832	1.654	2.202
651430	-0.376	0.494	0.441	0.381	-0.059	-0.417	-0.094	0.292	0.295	-0.166	-0.206	0.925	0.111	0.293	0.048	0.407	0.434	0.239	0.229	0.09	-0.479	0.407	-0.557	0.798	0.174	0.809	0.39	0.146	-0.378	-0.396	0.332	-0.554	-0.081	-0.401	0.149	0.138	0.566	0.896	-0.724	0.022	0.032	0.382	0.614	-0.419	-0.246	0.148	-0.371	-0.075	0.112
6491	2.313	1.881	3.56	0.599	1.634	1.664	2.902	3.406	1.763	2.431	1.878	1.278	1.234	1.44	2.832	3.629	2.19	1.326	2.864	2.144	0.966	3.774	2.041	2.756	2.303	1.464	2.681	0.688	1.468	1.395	1.158	0.843	1.773	1.499	2.375	1.43	1.054	3.16	3.648	3.682	3.519	2.13	2.248	1.271	0.804	2.617	2.054	2.137	1.771
200298	1.697	2.981	1.141	0.708	-0.079	2.134	-0.132	0.986	-1.115	0.01	0.895	2.077	0.921	0.124	0.137	2.983	2.69	2.402	1.573	0.336	1.308	0.925	0.281	4.172	1.298	1.403	1.233	0.987	0.841	1.205	0.982	2.411	1.983	2.576	2.185	0.546	0.508	2.595	1.297	1.282	-0.677	0.919	1.152	1.728	0.492	1.261	2.043	0.598	1.707
5367	0.69	2.371	1.932	0.275	1.529	3.592	1.377	2.754	0.589	0.853	2.708	0.182	1.176	-0.252	0.906	2.818	1.69	2.257	2.071	1.53	2.803	1.798	1.517	1.343	1.103	-0.066	2.538	0.742	0.181	1.911	-0.009	0.956	0.321	4.93	1.39	-1.24	1.344	1.632	1.96	1.342	0.918	0.845	1.452	-0.605	1.885	1.372	1.741	0.698	1.836
57819	0.895	0.773	1.567	-0.334	0.62	0.889	1.293	0.391	0.946	-0.054	0.901	0.118	1.225	0.507	0.957	0.271	0.566	0.605	1.082	0.789	0.614	1.122	1.083	0.482	0.647	0.27	0.964	0.674	1.851	0.463	0.611	-0.125	1.151	0.448	0.403	0.827	0.38	1.541	0.219	1.018	0.732	1.05	0.869	0.421	0.032	0.313	0.441	0.982	0.667
4299	-0.898	-1.642	-0.81	-0.965	-0.611	-0.237	0.383	0.457	-0.263	0.918	-0.7	-0.419	-0.147	-0.427	-0.018	-0.664	0.366	-0.717	-1.083	-0.076	-0.294	-0.761	-0.756	0.47	-0.195	-0.506	-0.23	0.393	0.041	-1.015	-0.445	0.463	0.262	0.49	-0.068	-0.069	-0.305	-0.56	-0.299	-0.965	0.609	-0.361	-0.574	-0.657	-0.792	-0.364	-1.148	-0.027	-0.577
221955	-0.526	0.604	-0.115	-0.146	0.272	-0.242	0.216	-0.542	0.557	0.745	-0.357	0.385	-0.162	0.389	-0.065	-0.262	0.64	0.029	0.562	-0.115	-0.07	0.238	-0.089	-0.249	0.034	1.459	0.542	0.736	0.184	0.505	0.437	-0.173	-0.007	-0.034	0.592	-0.339	0.167	-0.089	-0.206	-0.344	-0.083	0.976	0.197	0.157	0.181	0.054	0.836	0.055	-0.152
6123	-0.408	-0.17	0.102	0.094	0.01	-0.715	0.053	-0.546	-0.055	0.26	-0.557	-0.032	0.201	-0.139	0.115	0.153	-0.441	-0.188	-0.476	0.326	-0.281	-0.593	-0.022	-0.086	0.079	0.408	-0.57	-0.482	0.368	0.131	0.007	-0.509	-0.666	-0.713	-0.026	0.161	0.154	0.427	0.026	0.155	-0.128	0.559	0.085	-0.172	-0.14	-0.531	-0.301	-0.08	0.438
80869	0.8	2.322	1.449	1.02	0.595	-0.316	1.969	0.356	0.923	1.319	0.735	3.282	1.763	1.056	-1.301	0.888	0.317	1.811	1.168	-1.673	3.067	1.436	1.456	1.984	-0.158	2.213	-0.317	1.239	0.223	-0.255	0.331	1.916	1.003	1.49	1.744	1.785	0.951	2.207	2.972	2.86	2.88	3.137	1.906	2.499	1.201	1.091	1.404	0.847	1.186
400359	-0.311	-0.096	0.573	-0.171	0.178	-0.56	-0.477	0.157	-0.273	0.443	-0.102	0.489	0.036	0.528	0.084	-0.369	0.292	-0.239	-0.898	0.34	1.026	-0.119	-0.135	-0.372	0.095	0.102	0.525	0.567	-0.503	-0.044	-0.044	-0.314	0.074	0.598	-0.433	-0.104	0.178	0.084	0.094	-0.293	0.192	-0.767	0.631	-0.055	0.142	-0.259	-0.148	-0.219	0.3
55888	-0.329	-0.51	-3.361	-2.65	1.237	0.75	-0.229	-1.302	0.209	-0.671	-0.803	-0.691	1.113	-0.142	-2.742	-2.641	-0.787	0.817	-1.82	0.811	0.882	0.991	-1.163	0.798	1.282	-3.297	-0.808	-0.437	0.586	-2.351	-0.669	-0.34	1.052	0.793	-3.501	0.987	-0.527	-2.934	-2.005	0.461	0.198	-1.617	0.411	-0.2	-0.482	0.469	-0.682	-0.073	-0.761
4216	-0.418	0.205	0.092	-0.657	-0.258	0.169	0.517	0.171	0.155	-0.574	-0.145	-0.25	1.06	0.664	-0.168	0.345	0.724	0.88	0.754	0.767	0.736	-0.862	0.724	0.457	0.657	0.203	0.232	0.251	0.923	-0.01	0.339	0.754	0.451	0.207	1.107	0.755	0.39	1.066	0.223	0.117	0.852	-0.115	-0.041	1.213	0.117	0.225	-0.211	0.54	0.536
8681	-0.372	-0.359	-0.785	-0.193	-0.944	-0.471	-0.265	0.152	-1.068	0.308	-0.719	0.235	-0.526	0.135	-0.121	-0.157	0.104	-0.604	-0.197	-0.252	-0.54	-0.275	-0.202	0.179	-0.471	0.342	-0.103	-0.314	-0.435	0.187	-0.781	0.001	-0.173	0.568	-0.432	-0.69	-0.247	-0.836	0.808	-0.347	-0.463	-0.645	-0.144	0.137	0.326	0.143	0.032	0.014	0.461
80303	1.045	-2.49	-2.783	1.157	-1.146	0.837	1.172	2.009	2.028	-2.105	-1.209	-0.696	-1.366	1.5	-2.807	-1.465	-1.306	-1.282	-0.966	-0.087	-2.593	-2.168	0.199	-1.801	1.117	-1.563	-0.645	-1.726	-1.945	-0.957	-0.646	-0.457	-1.138	0.679	0.725	-1.872	-1.256	-1.904	0.156	-1.207	-4.198	-2.964	-3.561	0.527	0.795	-1.379	-1.327	2.031	-2.889
54904	-0.413	-0.49	0.012	-0.134	0.047	-0.221	-1.047	-0.257	-1.339	-0.028	0.378	0.531	-0.859	-0.376	0.433	-0.161	-0.466	-0.623	-0.2	-0.117	0.564	0.98	-0.144	-0.818	0.198	-0.823	-0.11	-0.585	0.895	-0.82	-0.256	-0.003	-0.312	0.264	-0.653	-0.558	-0.085	-1.796	-0.049	0.407	-0.169	-0.697	-1.18	0.4	0.876	0.296	-1.202	0.039	-0.273
730	0.082	-6.788	-1.772	-1.286	-1.778	0.186	-2.173	-2.186	-3.183	-1.423	0.199	-1.95	-1.077	-0.23	-3.214	-4.273	-2.379	-0.341	-2.678	-5.984	-1.824	-1.375	-0.495	-2.044	-2.701	-5.7	-7.459	-5.014	-1.379	-1.782	-1.889	-0.124	-1.011	-0.48	-6.183	-1.491	-3.849	-3.257	-5.693	-4.527	-5.943	-7.134	-5.923	-1.136	-0.923	-1.495	-4.329	-2.366	-0.897
79843	1.528	-0.849	1.949	-1.307	-0.221	2.517	-0.774	5.233	-1.113	-0.969	0.882	0.545	-0.377	1.884	-0.56	-0.669	-0.048	2.316	-0.344	-1.14	0.894	2.751	-0.437	1.666	-0.578	-0.62	2.395	-1.18	1.991	0.037	0.396	0.226	1.772	3.44	-1.95	1.032	-0.049	-1.328	-1.528	0.863	-0.306	-0.759	-0.077	1.34	0.6	2.175	0.988	1.544	1.038
254571	-0.265	-0.029	0.428	-0.307	-0.103	-0.154	-0.292	-0.041	-0.225	0.255	-0.091	0.086	-0.41	0.092	0.063	0.089	0.363	-0.335	-0.136	-0.322	-0.59	-0.089	-0.008	-0.295	-0.088	0.21	-0.231	0.149	-0.2	0.298	0.239	-0.853	-0.19	-0.699	-0.254	0.016	0.653	0.161	-0.398	0.245	-0.335	0.787	0.021	-0.427	-0.049	-0.213	-0.468	-0.221	0.166
345456	-0.176	0.027	-0.816	0.247	-0.12	-0.161	-0.154	-0.279	0.25	0.424	-0.228	-0.069	-0.845	-0.11	0.337	-0.124	0.02	-0.077	0.212	-0.052	-0.531	0.178	-0.395	0.04	0.039	0.822	0.004	0.083	-0.144	0.382	0.059	-0.808	-0.571	-0.521	0.163	-0.233	0.368	0.259	-0.032	0.357	0.07	0.02	-0.165	-0.152	-0.336	-0.364	0.087	-0.204	-0.019
284391	2.561	-0.473	-2.928	-0.986	0.168	0.735	0.693	-0.059	-3.711	2.706	-0.987	-3.108	0.485	2.129	-2.409	-2.096	0.255	-0.77	-0.454	0.475	0.485	1.522	-1.504	0.482	-2.455	-3.789	-0.243	-1.012	0.602	-1.87	-0.684	-0.836	0.073	1.472	-4.81	-0.305	0.22	-4.085	1.279	2.213	1.892	1.379	-0.312	0.66	-1.357	0.507	-0.687	0.954	0.224
57732	-0.758	-0.396	-0.183	0.483	-0.837	-0.38	-1.179	-1.189	-0.067	0.078	-0.462	0.083	0.272	0.03	-1.584	-0.355	-0.775	-0.324	0.168	-1.489	0.831	-0.406	-0.982	-1.002	-1.729	0.129	-0.494	0.25	-0.824	0.242	-1.227	0.7	-0.735	0.034	0.33	-1.177	-0.573	-0.445	-0.918	-1.307	-0.482	-1.131	-1.038	0.037	0.15	-0.071	0.583	-0.827	-1.054
1774	0.063	0.691	-0.715	0.369	0.048	0.221	-0.003	0.116	0.314	-0.002	0.501	-0.625	-0.218	0.755	-0.391	0.171	0.455	0.387	-0.117	-0.242	0.025	-0.526	-0.06	-0.562	0.394	1.511	0.455	-0.663	-0.655	0.932	0.22	0.568	0.19	0.297	0.681	-0.114	-0.245	-0.389	0.048	0.179	-0.574	-0.139	-0.856	0.458	0.327	0.331	0.903	-0.186	-0.17
284340	3.392	0.584	0.143	0.247	2.113	1.763	3.851	0.534	0.823	0.023	-0.391	-0.029	2.709	-0.863	0.039	4.651	-0.451	1.296	-0.893	3.896	0.687	-0.415	-0.235	-1.24	6.45	0.329	6.547	-0.914	3.978	0.353	0.044	0.824	0.879	-0.608	-3.399	1.097	0.914	0.423	0.079	0.444	0.895	0.87	0.237	-0.931	-0.38	-0.203	-1.178	0.95	-0.262
10575	0.544	0.083	0.979	0.364	2.465	-0.038	-0.213	0.199	0.905	0.049	-0.096	0.916	0.235	0.969	0.735	0.817	0.012	0.323	1.258	2.088	0.231	0.776	1.331	0.553	1.365	-0.251	0.172	0.524	0.189	0.873	0.372	-0.949	0.653	-0.262	0.77	0.529	0.797	1.032	0.906	0.356	0.229	0.094	0.81	-0.171	0.696	-0.061	0.843	0.337	0.138
4593	-0.336	-0.267	-0.223	0.568	-0.039	-0.498	0.123	-0.776	-0.277	-0.331	-0.223	-0.469	-0.251	0.149	-0.176	-0.61	-0.077	-0.064	-0.261	-0.233	-0.68	-0.645	-0.211	-0.231	-0.052	-0.262	0.022	-0.076	0.134	0.086	-0.528	-0.335	-0.283	-0.871	-0.37	-1.265	0.099	0.107	-0.327	0.039	-0.449	0.221	-0.596	-0.371	-0.224	-0.948	-0.387	-0.005	-0.456
766	-0.03	-0.232	-0.259	-0.273	0.384	-0.669	-0.147	-0.422	0.016	0.124	-0.534	0.285	-0.196	0.181	0.132	-0.219	0.016	-0.43	-0.028	-0.048	-0.218	-0.328	-0.456	0.094	0.996	0.296	-0.317	0.08	-0.258	0.25	-0.095	-0.512	-0.608	0.077	-0.029	0.033	0.088	-0.532	-0.258	-0.016	0.046	1.186	0.154	-0.009	0.054	0.03	-0.346	0.19	0.023
126520	-0.006	-0.226	0.057	0.569	0.146	-0.525	-0.033	-0.519	0.305	-0.247	-0.291	0.192	-0.085	-0.105	-0.296	-0.525	-0.223	-0.454	0.08	0.527	-0.106	-0.242	-0.077	-0.414	0.085	0.284	-0.405	-0.244	-0.487	-0.036	0.142	0.027	-0.538	-0.415	0.048	-0.224	0.092	0.098	-0.586	0.486	0.203	-0.12	-0.174	-0.312	-0.127	-0.505	-0.753	0.028	0.169
84740	0.363	3.873	0.158	0.048	0.126	5.598	0.311	0.338	-0.217	0.476	-0.103	0.14	4.245	-0.129	0.018	0.215	1.062	0.322	6.499	0.109	0.413	0.584	0.366	-0.053	0.041	0.306	-0.142	0.321	0.516	0.203	0.324	1.048	0.075	0.156	5.444	0.104	1.013	1.876	1.048	0.22	0.063	0.704	0.396	-0.182	-0.499	0.477	0.267	1.32	2.304
124801	-0.059	-0.102	0.66	-1.293	0.761	0.39	0.728	0.658	1.062	0.847	0.333	-0.362	-0.136	0.188	0.696	0.77	1.19	-0.048	0.954	0.775	-0.335	1.739	0.423	1.191	0.219	1.062	0.367	1.599	0.335	0.544	0.858	-0.937	0.646	-0.195	0.839	0.368	0.265	0.235	-0.021	1.48	1.661	0.58	0.19	-0.202	0.119	0.057	0.206	0.861	-0.434
54900	-0.323	-0.832	-0.902	0.505	-2.786	1.904	-2.575	1.048	-1.628	-0.156	1.532	-1.581	-1.525	-0.92	0.104	-0.981	-1.311	0.44	-1.552	0.494	1.184	-1.323	-1.612	-1.342	-2.065	-1.503	0.866	-0.735	-0.683	-1.163	-1.14	-0.239	0.195	4.535	-1.357	-2.192	-1.216	-0.228	0.76	-1.12	-2.237	-0.276	-0.925	-0.176	0.406	1.821	1.6	-2.143	-0.2
387707	0.121	0.327	0.041	-0.733	-0.389	0.692	-0.587	-0.276	-0.237	0.011	0.572	-0.25	-0.005	-0.076	-0.617	0.139	0.223	0.697	0.704	-0.401	0.667	0.365	0.487	0.113	0.319	0.336	-0.489	-0.657	-0.311	0.099	0.001	0.442	-0.374	1.588	0.208	-0.172	-0.232	-0.594	-0.106	-0.859	-0.493	0.82	0.26	-0.194	0.017	0.529	-0.031	-0.026	0.403
56979	0.041	-0.208	-0.146	-0.69	0.07	-0.685	0.382	-0.099	-0.081	0.468	-0.49	-0.164	-0.263	-0.342	-0.078	-0.111	-0.668	-0.574	-0.514	-0.191	-0.16	0.023	-0.309	0.21	0.377	0.022	-0.051	-0.009	-0.142	0.629	-0.647	0.135	-0.083	-0.66	0.153	0.354	0.564	-0.346	-0.323	-0.044	0.164	-0.345	-0.14	0.157	0.09	-0.164	-0.689	0.213	-0.038
8433	-0.219	0.225	-0.413	0.341	0.186	-0.589	-0.164	-0.348	0.251	-0.116	-0.719	0.223	-0.151	-0.277	-0.107	0.023	0.1	-0.434	-0.029	-0.426	-0.364	-0.251	0.015	-0.055	0.32	0.192	-0.548	-0.222	-0.318	-0.148	0.046	-0.73	-0.525	-0.253	0.136	0.103	0.305	0.633	-0.07	-0.027	-0.007	0.356	0.022	-0.608	-0.306	-0.248	-0.214	-0.307	-0.207
6764	0.296	1.061	0.208	0.581	-0.524	0.41	1.001	0.214	1.802	0.027	0.501	0.083	1.52	0.074	-1.559	-0.19	0.778	0.332	0.404	0.546	-0.318	0.323	0.24	0.539	1.402	0.843	0.18	-0.041	0.642	-0.331	0.563	1.03	0.652	0.77	1.228	0.648	-0.676	0.099	0.127	-0.238	0.684	2.198	1.064	1.689	0.101	-0.143	0.368	1.349	1.317
286557	0.202	0.249	0.199	-1.533	0.375	-0.583	-0.495	1.893	0.455	0.039	-0.223	0.307	0.604	0.256	0.537	0.119	-0.404	0.087	-0.176	0.012	-0.903	-0.648	0.443	-0.407	0.165	-0.288	1.286	0.624	0.256	0.244	0.157	-0.13	-0.74	-0.351	0.036	0.706	1.138	0.231	0.655	0.675	0.047	0.086	2.896	-1.127	-0.162	-0.752	0.128	0.035	0.172
26256	2.315	2.512	0.226	-1.713	1.995	1.49	2.243	0.921	-0.04	1.907	2.555	-0.681	1.118	-0.095	0.624	1.299	3.118	0.353	4.133	-1.103	1.281	0.703	1.177	0.54	2.192	0.882	-0.34	4.929	0.58	-0.576	2.669	3.832	1.019	2.122	1.921	0.848	0.629	5.502	-1.967	1.396	0.353	2.414	2.057	0.688	1.861	2.736	1.423	2.731	0.545
283278	-0.958	-0.067	-1.021	-0.309	0.025	0.28	1.096	-0.105	1.19	0.452	0.03	0.216	1.47	-0.11	0.289	0.085	0.098	0.061	-2.246	-0.115	-0.166	0.524	0.886	-0.5	0.961	0.562	-0.057	0.481	0.526	0.921	0.186	-1.158	0.194	-1.06	-0.218	0.12	0.687	0.77	-0.51	-0.978	-0.021	-0.316	0.139	-0.11	-0.456	-1.693	-0.401	0.003	-0.676
55338	-0.065	0.586	0.389	0.225	0.155	0.115	0.433	0.621	-0.046	-1.23	0.054	0.889	0.055	-1.352	-0.344	-0.772	1.767	0.998	-0.362	-0.23	0.175	-0.936	-0.128	0.213	0.594	-1.682	1.398	0.528	0.399	-1.084	0.097	1.276	-0.384	0.825	-0.273	0.728	-0.195	-0.477	-0.352	0.388	1.436	1.414	1.003	0.522	-1.551	0.299	-0.123	-0.029	1.072
285812	-1.477	-0.881	-0.202	0.558	-0.631	0.277	1.753	-1.563	0.93	-0.769	-0.332	1.339	-0.555	0.252	-0.921	1.044	-0.509	1.261	-0.218	0.486	-0.035	0.69	0.34	-0.163	-0.749	1.534	-1.138	0.038	1.382	0.124	0.046	0.279	-0.925	0.275	0.423	-0.241	0.437	0.624	0.42	-0.22	-0.341	0.867	-1.001	0.293	0.799	0.441	1.153	-1.433	-0.248
550112	-0.493	-0.213	-2.151	0.897	-0.045	-1.129	-0.293	-0.479	-0.9	-0.238	-0.345	-0.487	-0.847	0.668	-0.699	-0.624	0.01	-1.23	-1.59	-1.394	-0.057	-0.253	-1.057	0.522	0.096	-0.252	-0.944	-0.644	-1.203	-0.628	-0.843	-0.262	0.35	-0.172	-1.045	-0.145	-0.433	-0.479	0.615	-1.654	-0.32	0.03	-0.712	-0.135	-0.293	-1.007	0.257	-0.915	-0.632
56938	-1.667	0.26	-0.345	-0.711	1.054	1.136	-0.941	1.147	-1.677	0.984	1.029	-1.974	-2.661	-0.94	0.186	1.036	1.621	-2.132	-0.642	-0.67	0.664	-0.917	-0.884	-1.389	0.879	-1.673	1.615	-0.06	-2.18	-2.289	0.328	0.237	1.313	0.596	0.943	-1.752	0.305	0.003	-3.227	-3.024	-0.331	0.476	1.312	0.66	0.457	1.432	-1.236	1.489	-0.778
1140	-0.64	0.178	-0.747	1.378	-0.121	-0.243	0.291	1.292	0.988	-0.308	-1.05	-0.494	0.275	-0.212	-0.743	-0.581	-0.151	-0.276	0.225	-0.31	-0.922	-0.635	-0.946	-0.793	-0.427	-0.924	-0.237	-0.363	-1.066	0.522	-0.729	0.18	-0.155	-0.78	-0.04	0.367	1.088	-1.543	1.122	0.875	0.741	0.081	0.168	-0.133	-1.225	-0.234	-0.44	0.562	0.064
400451	0.648	-0.544	-1.048	-0.819	0.307	-0.467	-1.175	1	1.37	1.037	0.857	-0.624	0.02	-0.388	-1.484	-1.541	-0.773	-0.229	-1.565	0.189	-0.079	1.801	0.441	-0.615	0.421	1.181	0.34	-0.16	0.852	0.182	-0.776	-0.391	0.525	-0.652	-0.687	-0.185	-1.456	-0.316	-0.658	-0.569	0.114	-1.941	-0.884	0.429	-0.699	0.573	2.128	1.07	0.063
79613	-0.155	-1.251	0.648	-0.126	-0.277	-1.718	0.134	-0.335	-1.098	-0.047	-1.525	-0.047	-1.365	-1.544	0.131	-0.297	-0.408	-1.38	0.286	-1.313	0.249	-0.965	-0.376	0.009	0.526	0.17	-1.53	0.176	0.095	-0.14	-0.058	0.252	-0.727	-1.303	-0.91	-0.719	0.864	-0.594	-0.85	-0.56	1.071	-1.165	-1.297	0.816	-1.355	-1.007	-0.782	-0.343	-1.293
10794	0.211	-1.988	-0.63	-0.723	1.022	-1.152	0.236	0.935	-0.832	-0.474	0.436	0.376	-0.551	-0.741	0.606	-1.718	-0.025	-0.755	-1.183	1.369	-0.007	0.352	-0.637	-0.368	1.898	-0.261	-0.322	-0.897	-0.473	-1.137	0.174	-1.105	0.287	-0.114	-0.344	-1.252	-0.928	-1.897	0.08	-1.772	1.065	-1.339	-0.936	-0.785	-0.129	-0.197	-0.7	0.688	-0.752
353332	0.017	-0.247	-0.436	0.031	0.069	-0.08	-0.341	-0.786	0.046	0.234	-0.56	-0.303	-0.26	-0.324	0.428	0.132	-0.479	-0.202	-0.391	-0.776	-0.186	0.031	-0.34	0.022	0.264	0.165	-0.468	0.102	-0.697	0.086	0.157	-0.215	0.037	-0.498	-0.057	0.094	-0.247	-0.367	-0.391	-0.125	0.053	0.108	0.126	-0.603	-0.159	-0.342	-0.335	-0.103	-0.189
340784	-0.114	-0.074	0.327	0.193	0.236	-0.382	0.237	-0.386	0.159	0.211	-0.136	0.41	0.158	0.409	0.28	0.279	-0.048	-0.213	-0.003	0.253	-0.442	-0.619	-0.284	0.15	0.052	0.695	-0.554	0.137	-0.166	0.19	0.089	0.038	-0.42	-0.357	-0.043	0.344	-0.154	0.384	-0.055	0.636	-0.064	1.094	-0.284	-0.182	-0.145	-0.468	-0.13	-0.021	0.419
199786	-0.183	-0.436	0.412	-0.5	-1.204	0.418	-0.783	0.062	-0.225	0.12	0.173	-0.162	-0.487	0.001	-0.065	-0.55	-0.238	-0.018	-0.384	-0.857	0.061	0.244	-0.214	0.173	-0.278	0.327	-0.521	0.229	-0.503	-0.444	-0.278	-0.028	-0.009	0.424	-0.292	0.198	-0.749	0.409	-0.462	-0.801	-0.07	-0.291	-0.202	-0.646	-0.281	0.003	0.329	-0.407	-0.204
139728	-0.097	-0.232	-0.407	0.935	1.121	-0.854	0.148	-0.444	0.835	0.263	-0.279	0.408	0.241	0.051	0.061	0.247	2.43	0.484	0.114	-0.263	-0.699	-0.345	-0.393	0.049	2.091	0.784	-0.05	-0.231	0.057	0.193	0.126	-0.3	-0.048	-0.37	2.427	1.657	0.394	0.148	0.812	-0.029	-0.141	2.84	0.472	-0.371	0.146	0.214	-0.394	0.389	-0.411
10910	-0.596	-0.984	-0.2	-0.129	0.909	-0.687	-0.979	-0.908	-0.023	-0.582	-1.079	1.779	-0.639	0.391	0.149	-1.312	-1.189	-0.056	-0.748	0.487	0.001	-0.259	-0.021	0.06	-0.299	0.368	-0.235	0.672	-0.654	0.283	-0.398	-0.086	-0.147	-0.872	-1.812	-0.368	0.025	-0.065	0.286	0.548	-1.781	-2.029	-1.237	-0.122	0.157	-0.11	0.731	-1.419	0.588
9762	0.643	2.162	-0.467	0.121	-0.401	-0.5	1.89	-0.117	1.621	0.785	-0.599	0.792	1.947	-0.144	1.367	0.751	0.988	2.056	1.095	-0.128	-1.104	-1.312	0.387	0.113	-0.09	2.156	-0.666	-0.089	0.882	0.561	1.307	1.096	0.109	-0.202	1.735	1.407	0.849	1.243	-0.564	0.037	0.405	2.248	0.883	1.139	0.675	1.616	1.706	0.412	1.63
64377	-0.15	-0.388	-0.351	-0.175	0.073	-0.477	-0.185	0.017	1.673	-0.206	0.046	0.438	-0.176	0.385	0.117	-0.015	-0.321	-0.382	-0.43	0.253	-0.615	-0.047	-0.027	-0.453	-0.289	0.073	-0.235	-0.279	0.295	-0.035	0.214	-0.667	-0.319	-0.5	0.584	-0.218	-0.082	0.741	-0.326	0.005	0.072	0.021	-0.26	-0.767	-0.139	0.097	-0.46	-0.281	0.222
2395	-1.179	-1.201	-0.742	-0.054	0.304	-1.544	-0.104	-2.674	-0.833	-0.461	-0.883	-0.21	-0.555	-0.731	-0.464	-0.32	-0.818	-0.655	-0.817	-0.509	-0.999	-0.879	-1.403	-0.213	-0.147	-0.817	-0.735	-0.341	-0.911	0.477	-0.893	-1.696	-0.802	-1.474	-1.199	-1.237	-0.091	-1.281	-1.964	-1.295	-1.032	-1.934	-1.003	-1.083	-0.912	-1.103	-0.522	-1.223	-1.23
9399	0.217	0.021	-0.197	0.37	-0.103	0.219	-0.652	-0.109	0.309	0.801	-0.716	0.71	0.123	0.474	-0.189	-0.1	0.886	-0.543	0.224	-0.229	0.109	0.418	0.57	0.414	-0.424	1.312	0.184	0.163	-0.038	0.671	0.325	0.303	0.122	-0.252	-0.238	0.537	0.616	0.578	0.333	0.021	-0.131	0.165	-0.088	0.318	0.255	-0.285	0.498	0.617	0.539
65005	0.279	0.032	1.129	-1.456	0.901	0.926	1.382	1.056	1.228	0.419	1.194	0.363	0.571	0.374	1.409	1.3	-0.066	0.397	0.583	2.066	0.183	1.258	0.447	1.292	1.021	0.291	-0.065	0.502	1.965	0.682	1.363	-0.811	0.511	-0.611	1.139	1.095	0.868	1.252	0.579	1.293	0.801	-1.54	0.775	0.054	0.41	-0.574	0.05	1.446	-0.04
140465	-0.004	0.408	0.217	-0.096	0.107	0.64	0.852	0.731	1.364	0.575	0.303	-1.126	0.747	-0.039	0.969	0.079	0.784	0.937	0.96	0.906	0.323	0.545	0.028	1.179	1.362	0.031	0.834	0.348	-0.354	0.599	-0.069	0.051	1.044	0.176	1.118	1.372	0.426	0.044	0.151	-0.284	0.84	1.497	1.659	0.733	0.093	0.506	0.129	0.053	0.164
11022	1.176	1.862	1.996	-0.301	1.624	1.153	2.394	3.888	1.43	1.267	2.21	1.299	1.354	0.591	1.254	0.067	1.918	1.167	2.352	1.946	1.172	1.884	1.395	0.775	2.458	1.713	1.643	1.035	2.702	0.346	2.219	3.196	0.937	1.22	2.066	1.576	2.315	2.856	1.591	2.455	2.678	2.408	0.487	1.957	1.068	0.959	1.265	1.484	2.197
7067	1.186	1.486	0.199	0.407	0.17	0.89	1.094	-0.015	1.603	0.231	0.491	0.008	0.639	2.513	0.606	1.629	1.533	1.072	2.818	0.539	-0.087	1.641	1.142	0.362	1.078	1.546	1.319	0.835	1.857	0.212	0.374	0.986	0.633	0.355	0.888	0.42	0.131	1.316	0.382	0.753	0.189	2.559	1.028	0.933	1.149	0.59	1.804	0.674	0.669
64756	0.12	-0.258	-0.048	-0.61	-0.107	-0.712	0.789	0.505	0.588	0.509	0.294	0.069	-0.382	-0.048	-0.031	-0.664	0.198	0.281	0.431	0.636	-0.42	0.03	0.689	0.657	-0.132	0.35	0.303	0.292	0.334	0.037	0.079	-0.015	0.113	-0.14	0.63	-0.167	-0.112	0.234	0.834	1.002	1.329	-0.006	-0.131	0.5	0.467	0.395	-0.352	0.65	-0.431
57124	0.405	0.273	0.284	-0.159	-0.903	1.89	-0.552	0.217	-0.967	-0.208	0.996	-0.214	0.38	-0.056	-0.669	-0.436	0.612	1.469	1.015	-0.505	1.145	-0.163	0.002	-0.518	-1.418	-0.965	1.086	-1.469	0.433	-0.873	-0.536	0.952	0.212	1.337	-0.73	0.903	-1.117	-0.173	0.172	-0.226	-1.66	-1.099	-0.061	0.502	2.397	0.296	-0.51	-0.181	1.027
5596	-3.794	0.425	-0.974	-1.415	-0.089	-0.505	-1.702	1.077	-0.578	0.382	-0.076	-0.407	-0.971	1.166	-0.49	1.299	0.144	-1.643	-2.235	0.193	-0.737	-0.487	0.267	0.305	1.698	0.527	-0.091	0.289	-0.397	2.645	0.05	-4.166	0.686	-1.073	0.212	-0.014	0.948	1.108	-1.782	-1.495	1.085	-0.665	-0.659	2.547	0.365	-1.093	-1.194	1.414	-0.411
26225	0.238	-0.234	-0.598	0.521	0.324	0.026	-1.068	0.01	-0.669	-0.595	-0.342	-0.692	0.693	-0.149	0.703	0.262	-0.586	-0.231	-0.064	0.394	0.249	-0.043	-0.213	0.176	-0.002	-0.877	0.175	-0.28	0.009	-0.214	-0.093	-0.743	0.332	-0.3	-0.336	-0.231	0.516	0.052	0.462	-0.363	-0.792	-1.513	0.014	0.02	-0.237	0.059	-0.665	-0.567	-0.58
4350	-0.159	-0.626	-0.543	0.037	-0.026	-0.498	0.619	-0.431	0.189	1.328	-0.888	0.023	-0.211	0.265	0.258	-0.223	-0.378	-0.377	-0.256	0.107	-0.461	-0.855	-0.514	0.38	-0.428	0.837	-0.643	0.314	0.328	0.293	-0.643	-0.322	-0.369	-0.342	-0.798	-0.028	0.357	-0.336	-0.019	-0.454	0.334	-0.632	-0.34	0.237	-0.788	-0.692	0.59	-0.541	-0.675
284632	-0.505	-0.047	-0.277	0.001	0.494	-0.391	0.483	-0.646	0.208	0.216	-0.06	0.143	0.378	0.208	-0.12	-0.009	0.398	-0.538	0.115	0.206	0.003	-0.264	-0.378	-0.247	-0.006	0.51	-0.299	-0.084	0.005	0.591	-0.291	-0.176	0.02	-0.154	0.579	-0.146	-0.194	0.033	-0.172	-0.093	-0.097	-0.308	-0.464	0.146	0.296	-0.328	-0.315	0.028	-0.148
3043	-1.288	-0.453	-1.242	-0.11	-0.796	-1.145	-1.906	-1.165	-2.791	-0.207	-0.417	-1.663	2.33	-1.927	-0.552	-0.918	-1.425	-0.085	-1.926	1.023	-2.47	-1.656	-2.617	-0.382	-3.231	-0.326	-1.072	-1.127	-2.123	-1.657	-2.409	-1.376	-2.791	-0.062	-1.004	-0.994	-3.162	-2.838	-0.87	-1.235	-0.272	-5.173	-1.194	0.022	-2.457	-3.421	-2.774	-1.245	0.279
6257	0.71	0.556	1.639	-0.658	-0.045	0.414	1.171	0.024	0.703	0.255	0.247	0.952	0.365	1.186	1.025	-0.063	0.35	-0.317	0.806	-0.087	0.022	1.199	1.496	0.454	-0.071	1.565	0.16	0.352	1.705	0.667	0.526	0.254	0.321	-0.02	0.35	0.604	0.586	0.607	0.432	1.061	0.592	1.221	0.539	0.4	0.379	-0.213	0.234	0.689	0.072
55690	-0.24	0.773	-0.393	-0.64	-0.7	1.138	-0.837	0.454	-0.28	0.52	1.329	-0.918	0.551	0.608	-0.852	0.344	0.79	1.041	0.799	0.129	0.852	1.229	0.552	-0.786	0.347	0.314	1.12	-0.179	0.746	-1.058	-0.065	-0.334	0.509	1.165	0.045	-0.029	-0.517	-0.056	0.133	-0.895	-0.269	1.34	0.746	0.957	0.762	0.48	0.329	0.905	0.648
124359	-0.835	-0.102	-0.213	-0.872	0.025	-0.618	-0.828	0.482	0.256	0.04	0.599	0.248	-0.848	-0.12	0.744	-0.1	-0.87	-0.453	-0.654	0.127	-0.191	0.507	-0.435	-0.64	0.395	0.695	0.194	0.808	0.076	0.153	0.139	-0.045	0.22	0.186	0.314	-0.677	0.089	-0.664	-0.781	-0.016	-0.671	-0.448	-0.418	-0.134	0.936	-0.512	-0.617	-0.295	-0.443
126374	-0.019	-0.185	-1.224	0.203	0.121	0.584	-0.263	-0.68	0.032	0.014	0.195	-0.879	0.334	0.23	-0.553	0.215	-0.605	0.437	-0.302	0.074	0.132	0.147	-0.087	-0.372	1.002	0.331	0.724	-0.748	-0.432	-0.092	-0.714	-0.124	-0.286	0.251	0.121	0.235	-1.14	-0.228	-0.386	-0.671	-0.334	1.053	-0.715	0.01	0.955	-0.027	-0.555	0.053	0.141
9609	-0.969	-1.195	-2.639	-0.724	-1.848	1.516	0.236	-0.737	-1.75	-0.024	2.886	-1.778	0.962	-0.046	-0.928	-0.807	-0.772	0.651	-2.518	-1.314	-0.313	-0.62	-0.415	0.265	-1.903	-1.246	1.581	-2.7	-0.58	-1.889	-1.553	-0.207	-0.751	0.12	-1.97	-0.673	-2.705	-0.084	-0.852	-0.371	-2.009	-0.528	-0.582	-0.53	-0.999	-0.601	-1.176	-1.139	-0.211
7559	-0.163	0.776	0.013	-0.514	0.346	0.032	0.156	0.697	0.533	0.625	-0.095	0.777	0.395	1.097	-0.247	0.789	0.071	0.59	-0.468	0.123	0.809	0.002	0.053	1.007	0.52	0.22	0.526	0.288	0.529	-0.467	0.184	-0.058	0.165	0.468	0.914	0.406	-0.152	0.573	0.69	0.378	0.32	1.318	0.965	0.686	0.322	0.809	0.006	0.827	0.055
400258	-0.791	-1.332	-0.838	-0.402	-1.251	-1.234	-1.872	-1.997	-0.83	-1.566	-0.85	-0.625	-0.903	-0.87	-1.173	-0.865	-1.512	-1.091	-1.409	-1.258	-1.455	-1.523	-1.128	-1.364	-0.519	-0.775	-1.462	-0.934	-0.363	-0.72	-1.527	-1.357	-1.449	-1.795	-1.855	-2.134	0.171	-1.358	-1.309	-1.16	-1.403	-0.727	-1.299	-0.511	-1.983	-1.489	-0.116	-0.216	-1.393
3290	-0.081	-0.546	-1.214	0.11	-3.258	-0.319	0.57	-2.024	-7.747	0.128	-0.784	0.426	-6.527	-3.066	-2.287	0.151	-0.603	-5.307	-4.443	-5.965	-1.218	-5.633	-0.446	0.003	-7.059	0.126	-6.957	0.462	-0.22	0.516	-0.129	-0.953	-4.401	-1.892	-0.472	-5.152	0.302	-0.985	-5.325	-5.119	-3.639	-8.32	-7.169	0.217	0.263	0.167	-1.242	-1.033	-5.637
644504	-0.077	-0.596	0.14	-0.023	-0.478	1.051	-1.054	0.423	-1.833	-0.222	0.88	-0.352	-0.326	-0.316	0.335	0.752	0.246	-0.321	-0.444	0.868	0.373	0.553	-0.032	0.109	-0.405	-0.415	1.322	-1.02	0.13	-0.451	0.136	0.419	0.566	0.978	0.175	0.448	-0.919	-0.616	0.248	-0.716	-0.735	-0.541	0.074	0.575	0.631	0.202	0.034	0.029	-1.157
7678	-0.459	-0.535	0.902	0.666	1.029	0.036	-1.123	0.658	0.807	0.87	-0.26	-0.1	1.178	-0.436	0.141	0.346	-0.172	1.518	-0.077	2.324	0.054	1.407	0.11	0.877	1.889	-0.632	-0.182	-0.599	1.122	-0.46	0.497	-1.169	0.1	0.489	0.517	0.714	-0.708	0.055	0.472	1.274	0.321	1.459	0.079	-0.25	-0.755	0.138	-0.003	1.148	1.236
8915	0.39	-1.063	0.081	-0.07	-0.707	0.299	0.294	1.238	-0.656	0.112	0.594	-0.457	-0.759	0.27	-0.047	0.343	-0.215	-0.676	-0.068	0.859	-0.061	0.971	-0.269	-0.227	-0.274	0.22	0.179	-0.013	-0.391	-0.482	0.486	-0.411	-0.435	-0.033	0.156	-0.979	-0.413	0.005	1.18	1.055	0.983	-0.741	-0.347	-0.642	-0.213	0.187	0.058	-0.071	-0.771
79659	-0.335	-1.143	-0.708	-2.329	-1.668	0.456	-1.637	0.579	-1.261	-1.696	0.574	-0.738	-0.476	-0.717	-0.597	-0.781	-1.085	0.402	1.164	-1.855	0.385	-0.082	0.511	-1.829	-1.198	-2.507	-0.065	0.264	-1.023	-1.575	-0.253	0.199	0.308	0.98	-1.881	-0.889	-1.929	-1.777	0.025	-1.566	-0.527	-1.222	-1.333	-0.431	0.003	0.932	-1.758	-0.912	-1.344
84275	1.138	0.811	1.405	-0.654	0.994	0.473	2.369	0.296	0.764	1.771	0.174	0.498	0.666	-0.557	0.676	-0.085	1.676	0.149	0.181	0.712	0.715	1.545	0.65	0.53	0.63	1.373	-0.152	0.242	1.069	0.437	0.746	-0.609	0.364	-0.734	-0.115	1.055	0.087	0.358	-1.059	1.412	0.861	-1.403	-0.117	0.146	1.258	-0.347	0.45	0.278	1.175
441046	-0.108	2.07	-0.948	-0.661	-0.598	-0.011	-2.437	0.474	-0.404	-0.049	-0.002	-0.976	0.198	-1.386	0.195	-0.759	1.988	-0.673	-0.041	-0.376	-0.797	-0.508	0.04	2.059	-0.548	-1.031	-0.048	-1.49	-1.24	-0.164	-1.531	-1.71	-0.129	-1.939	-2	-1.154	-0.258	-0.339	1.278	-1.286	-0.905	0.554	0.249	0.757	-1.579	-0.025	-0.085	-0.354	-0.119
284064	0.325	0.36	0.454	0.104	0.826	-0.019	-0.194	-1.137	0.197	0.229	-0.078	0.193	-0.132	0.137	0.725	0.148	-0.068	0.404	0.312	0.079	-0.185	0.411	0.067	0.306	0.471	0.456	0.309	0.332	0.24	-0.022	0.331	-0.622	-0.461	-0.595	-0.927	0.274	-0.058	0.311	-0.335	1.001	-0.019	-1.48	0.646	-0.829	-0.062	-0.244	0.216	-0.121	0.276
2305	2.824	4.625	5.077	1.356	3.088	3.066	4.355	2.425	4.184	2.319	2.73	1.81	2.789	1.658	4.074	4.84	3.834	3.236	3.71	3.412	3.125	2.467	2.549	2.002	4.305	2.253	3.822	1.712	3.334	2.065	3.053	2.68	3.369	4.093	2.847	3.755	2.571	3.762	2.683	3.103	2.415	2.567	4.208	1.874	1.81	3.353	2.531	1.955	3.272
10163	0.179	2.159	0.713	-0.342	0.075	1.525	1.733	0.116	0.733	0.487	1.185	-0.657	0.221	1.938	1.518	0.934	0.832	1.512	2.005	0.287	0.395	1.054	1.615	0.117	0.025	2.071	1.85	0.218	1.851	0.459	1.455	1.221	0.696	1.173	0.338	-0.148	-0.528	0.894	-0.131	1.758	0.609	2.91	1.521	1.572	2.05	0.917	2.605	0.62	0.591
116228	0.414	-0.368	0.892	0.533	0.708	-0.197	0.979	-0.188	0.55	0.043	-0.888	0.811	0.902	-1.84	-0.316	0.197	-0.053	-0.035	0.42	0.102	-0.442	0.99	0.261	0.289	0.584	-0.194	-0.349	-0.119	0.214	0.924	1.319	-0.484	-0.921	-1.02	0.583	0.184	0.157	-0.349	-0.112	0.812	-0.32	-0.638	-0.143	0.283	0.462	0.088	-0.813	0.781	1.173
202018	-0.28	-0.504	-0.405	0.416	-0.938	-1.254	-0.389	-0.452	-1.107	-0.38	-1.193	0.103	-0.64	-0.348	-1.519	-0.735	-0.908	-1.861	-0.198	-2.242	-0.466	-1.063	-1.11	-1.079	-1.157	-0.258	-2.163	-0.308	-0.835	0.367	-0.72	0.75	-1.735	-1.417	-0.839	-0.594	-0.397	-0.955	-0.792	-0.432	-0.428	-0.566	-2.532	-0.459	-0.595	0.305	-1.579	-1.71	-1.652
6804	0.074	1.118	0.3	0.554	0.557	0.485	0.541	-0.782	0.551	0.406	0.254	0.204	-0.347	0.403	0.396	0.114	1.338	1.166	0.644	0.165	-0.113	0.416	-0.331	-0.51	0.496	-0.207	0.95	0.072	0.327	0.188	-0.034	0.317	0.268	-0.402	-0.06	0.118	-0.13	0.182	0.384	0.137	-0.014	1.125	0.874	0.226	1.278	0.279	0.487	0.066	0.827
85359	0.677	-1.062	0.564	0.736	-0.457	-0.502	0.644	-1.113	0.496	-0.375	-1.325	0.115	-1.68	-1.484	-0.358	0.145	-0.403	-1.619	-0.815	-0.91	-0.809	-0.396	-0.341	0.896	-0.588	-0.14	-1.867	0.238	-0.277	0.139	-0.712	0.159	-0.783	-0.956	-0.169	-0.803	0.001	-0.809	-2.301	0.249	-1.251	-1.66	-1.222	-0.161	-1.828	0.016	-0.574	-0.817	-1.026
2359	0.273	-1.4	-0.938	-1.182	-0.258	0.599	-0.856	-0.261	-2.673	-2.946	0.459	-3.039	-1.218	-0.224	-0.401	-0.569	-1.027	0.213	-1.178	0.029	-0.029	-1.134	-0.616	-1.058	-0.523	-2.937	1.356	-1.857	-1.182	-0.744	-1.773	-1.495	-0.197	0.485	-2.787	-1.445	-1.132	-1.535	-0.83	-1.091	-5.476	-2.371	-0.982	-2.293	-0.68	0.232	1.803	-2.424	-1.066
10260	-1.63	0.129	-1.517	-0.358	-0.041	-0.859	-0.857	-1.247	-2.512	-0.355	-0.49	0.541	-0.946	0.24	-0.519	-0.178	-1.272	-0.565	-1.456	0.226	-0.115	-0.424	-0.835	-0.68	-0.015	-0.344	0.493	-0.745	-0.793	-0.233	-0.143	-0.422	0.03	-0.642	-1.301	-0.434	0.715	-1.04	-1.145	-1.531	-0.963	-1.982	-0.625	-1.092	-0.283	-0.503	-0.213	0.093	-0.598
441956	0.064	-0.352	0.148	-0.131	0.198	-0.703	0.157	-0.445	-0.114	-0.125	-0.599	0.005	0.063	-0.026	-0.075	-0.117	0.094	-0.226	-0.445	-0.192	-0.361	-0.473	-0.524	-0.016	-0.243	0.02	-0.641	0.308	-0.465	0.081	-0.106	-0.421	-0.555	-0.663	-0.049	0.03	0.52	0.124	-0.031	0.169	0.241	-0.396	-0.407	0.34	-0.203	-0.583	-0.552	-0.216	0.017
9967	-0.48	0.072	0.151	-0.782	0.019	0.425	0.298	0.239	0.911	0.192	0.588	-0.445	-0.528	0.604	0.637	0.603	0.267	-0.333	0.747	0.502	-0.289	0.708	0.455	0.136	-0.142	-0.105	0.05	-0.002	1.129	0.428	0.547	-0.506	0.344	-0.285	0.723	0.882	-0.249	0.599	0.143	-0.225	0.206	-0.79	0.019	0.369	0.201	-0.065	-0.047	0.214	0.059
5806	0.303	1.156	-1.371	-3.326	-2.397	1.373	-2.582	4.54	-0.561	1.968	2.038	1.086	-0.693	-0.838	1.913	-2.192	-0.135	-0.131	-0.882	2.133	1.132	-0.091	0.194	-1.399	-2.548	-0.478	1.164	-2.167	0.201	2.055	-1.89	-0.355	-0.294	1.051	-4.649	0.189	-0.706	0.782	0.901	-1.284	-3.024	3.926	0.629	3.057	2.359	1.982	-1.79	0.852	1.184
22997	-0.03	0.265	-0.199	0.546	0.071	0.371	-0.258	-0.204	-0.421	0.142	-0.227	0.386	0.069	-0.189	-0.134	-0.307	0.089	-0.399	0.236	0.045	-0.09	-0.182	-0.267	-0.052	0.148	0.23	-0.161	0.248	-0.124	-0.111	0.117	-0.44	-0.364	0.18	-0.019	-0.402	0.414	0.164	0.41	0.065	-0.224	0.051	-0.326	-0.564	-0.133	0.387	-0.087	-0.64	0.102
25934	-0.116	-1.076	0.372	0.582	-0.194	-1.276	-0.416	0.138	-0.471	0.855	-0.709	0.21	-1.141	-0.542	-1.673	-1.517	-0.91	-0.758	0.104	-1.113	-0.551	0.241	-0.749	0.403	-0.58	-0.514	-1.023	-0.406	-0.343	0.515	-0.674	-0.917	-1.212	-0.701	-0.813	-0.842	0.064	-0.833	-0.046	1.609	-0.289	-1.364	-1.491	-0.379	0.084	0.824	-0.06	-1.413	-0.737
56288	-1.068	0.338	0.205	1.282	0.105	-0.037	-0.374	-0.162	1.261	0.487	0.756	0.368	1.538	1.668	-0.033	0.123	-0.305	0.572	0.48	0.895	0.163	0.196	0.802	0.424	-0.123	0.804	-1.122	0.299	1.721	-0.705	0.455	0.287	0.733	0.123	-0.409	1.456	-0.209	1.284	0.745	-0.997	-0.385	0.699	0.843	1.32	0.444	-0.198	0.673	-0.074	1.096
256227	0.591	0.182	0.11	0.174	2.804	0.738	0.012	0.299	0.123	-0.024	1.327	0.191	0.317	1.391	0.311	0.556	1.948	1.885	1.52	-0.178	1.155	0.087	0.071	-0.392	4.269	0.373	0.467	0.642	0.287	0.923	0.987	-0.059	2.206	1.362	2.819	0.443	1.281	0.422	0.006	1.09	-0.144	2.949	5.035	0.288	1.416	-0.107	-0.029	0.718	1.538
375444	2.648	2.997	2.618	-0.485	1.462	2.348	2.49	3.614	1.766	1.45	2.054	1.865	1.543	1.451	1.49	3.025	1.975	3.007	1.642	1.77	2.548	1.512	1.556	2.47	3.421	1.642	2.929	0.589	0.697	0.692	1.098	2.812	2.379	3.275	2.873	1.15	1.525	2.888	3.711	2.458	2.723	3.288	2.563	3.664	2.014	3.034	1.985	1.682	3.262
54920	-0.717	0.098	0.42	-0.72	-0.169	-0.168	-0.633	0.609	-0.135	0.29	-0.33	0.524	-0.69	0.069	0.231	-0.07	0.037	-0.135	0.072	-0.246	0.443	0.305	-0.01	0.495	0.005	0.707	0.142	0.521	0.324	1.339	-0.3	0.054	0.231	-0.164	-0.062	-0.495	0.215	-0.316	-0.108	-0.06	0.067	-0.242	-0.358	-0.247	-0.093	-0.438	0.351	0.024	-0.24
115752	-0.226	-0.563	-0.097	0.718	-0.154	-0.936	-0.412	-1.028	0.321	0.883	-0.49	-0.111	-0.61	0.222	0.478	1.082	-0.186	-1.299	0.247	0.406	-0.282	0.308	0.749	0.414	-1.038	0.075	-0.817	0.014	-0.954	0.211	0.074	-0.482	-0.709	-0.755	0.448	-0.553	0.525	-0.256	0.202	1.467	-0.256	-2.024	-0.974	-0.885	-0.385	-0.002	-0.258	-0.097	-0.274
64943	0.404	1.855	-0.555	-0.352	2.935	2.275	0.488	0.447	3.109	0.37	1.651	-0.613	2.26	1.372	1.762	1.908	2.278	3.768	1.167	2.14	0.798	2.24	1.564	-0.833	4.237	0.482	1.399	0.04	1.762	0.065	0.893	0.506	2.582	1.812	1.224	2.213	-0.229	2.01	0.106	-0.413	0.678	4.929	3.431	0.75	1.083	0.735	1.912	2.009	1.937
975	0.08	-0.027	-0.671	-0.093	-1.077	-0.033	-0.305	-0.086	-0.255	0.065	-0.081	-0.03	-0.88	-0.509	-0.641	-1.657	-0.368	-0.814	-0.679	-3.344	-1.19	-0.739	-0.108	-0.169	-1.612	-0.092	-0.589	-0.826	-0.548	-0.15	-1.161	-0.529	-1.287	0.068	-1.367	-0.902	-0.453	-0.382	-0.451	-0.648	-0.424	-4.193	-0.84	-0.162	-0.161	-0.66	-0.399	-0.611	-0.436
25938	-1.752	0.215	0.2	0.175	0.508	0.175	0.035	0.435	0.32	0.517	0.33	0.061	0.037	1.356	-0.032	-0.136	-0.19	-0.603	0.123	0.703	0.455	0.584	0.077	0.458	-0.416	-0.031	0.374	-0.296	0.29	-0.384	0.55	-0.619	-0.117	-0.433	0.32	-0.488	-0.192	0.666	0.13	1.287	-0.265	0.038	-0.621	0.108	0.613	-0.831	0.302	0.205	-0.288
246181	1.21	-0.98	-1.232	0.584	-2.367	-1.021	-0.303	-1.057	-3.352	0.9	-2.235	0.372	-3.215	0.667	-2.184	-4.34	-1.024	-1.013	-1.633	-5.466	-2.026	-3.489	-1.549	0.783	-4.772	0.183	-2.348	-2.732	-1.521	-0.252	-0.433	1.594	-1.728	-2.62	-2.203	-2.932	-3.018	0.222	-0.896	0.788	-4.211	-3.167	-0.81	-0.317	-0.504	1.252	-0.563	-1.517	-2.744
528	0.761	2.166	1.899	0.525	0.792	1.534	-0.509	0.622	-0.648	-0.017	1.271	0.3	0.574	1.055	1.455	1.25	1.916	1.111	0.806	-0.005	1.321	1.66	1.716	-0.233	0.373	0.595	2.593	1.225	1.298	1.263	0.756	1.883	0.845	0.465	0.466	0.781	0.524	1.019	-0.045	0.859	0.224	0.331	1.659	0.289	1.241	0.807	2.05	0.838	1.067
54826	0.481	-0.24	1.311	0.877	-0.088	-0.839	0.222	-0.851	-0.521	-0.46	-0.652	1.323	0.23	1.231	-0.485	-0.528	-0.098	-0.244	0.305	-0.807	0.333	0.653	0.096	0.241	-0.678	-0.389	0.101	0.509	-0.481	-0.358	-0.464	0.276	0.426	0.453	-0.044	0.364	0.123	0.326	0.965	-0.807	-0.451	-2.291	-0.426	-0.228	0.002	0.032	-0.27	0.666	-0.23
5255	-1.291	0.425	-1.855	0.288	0.452	-1.849	-2.583	-0.741	-0.051	-1.42	-0.237	-2.103	-1.338	0.253	-1.309	0.542	-1.372	0.239	0.69	-0.333	0.373	-0.897	-1.492	-1.482	-1.011	1.439	-0.16	-0.869	-1.578	0.001	-0.052	1.545	-0.582	-0.043	-0.898	-0.619	-0.559	-1.585	0.902	-0.351	0.725	-3	0.512	0.6	-0.295	-1.049	-0.538	-0.765	-2.345
7518	0.848	0.145	1.185	0.771	0.271	0.754	-0.593	-0.471	-0.097	0.686	0.31	-0.041	0.517	0.789	0.212	-0.538	-0.056	-0.261	1.057	1.102	0.764	0.184	-0.019	1.265	0.601	-0.312	2.252	0.485	1.33	0.702	-0.244	0.901	0.878	0.641	-0.231	0.423	0.25	0.697	0.225	0.857	0.8	-2.484	0.596	0.406	0.364	0.252	0.165	0.418	0.366
10618	-0.073	-0.075	-0.142	-1.456	-0.516	0.306	-0.267	-0.363	0.012	-0.117	-0.09	-0.081	-0.055	0.184	0.368	-0.766	0.013	-0.771	-0.165	0.232	-0.072	-0.393	0.445	0.723	-0.508	-0.385	-0.202	0.621	0.293	1.123	1.126	-0.394	-0.283	-1.137	1.069	0.264	0.412	0.237	-0.358	0.099	0.231	1.929	-0.559	0.376	-0.049	-0.083	-0.99	0.024	-0.902
8697	0.106	0.548	1.365	0.049	0.459	0.375	0.68	0.91	1.137	0.173	0.544	0.485	0.95	1.337	0.878	0.791	0.876	-0.161	0.996	1.083	0.748	0.79	1.054	0.746	0.638	0.322	0.229	1.252	0.898	0.414	0.559	0.018	1.047	0.266	0.552	0.914	0.641	0.947	0.986	0.966	0.982	0.256	0.958	-0.05	0.631	-0.054	0.695	0.027	0.563
154215	0.999	-1.283	-0.662	-0.79	-0.796	1.874	-1.553	3.831	-1.298	-1.661	2.081	-2.091	-0.105	0.444	2.441	-2.378	0.173	-1.922	3.925	-0.428	-0.32	-0.546	2.243	-1.006	-1.332	-3.419	3.038	4.726	0.116	-2.478	1.985	-2.243	1.767	0.559	-2.264	-0.634	4.917	-1.263	-1.247	-0.655	5.594	3.305	2.492	0.939	-0.597	0.02	2.562	-1.741	-1.56
8938	0.144	0.26	0.224	0.541	-0.405	-0.719	1.233	-0.578	0.24	0.556	-0.677	0.189	-0.776	0.878	0.243	-0.344	-0.209	-1.32	0.038	-0.041	-1.083	-0.775	-0.099	0.373	-0.7	0.531	-1.185	0.276	0.371	0.002	-0.178	-0.283	-0.947	0.297	-0.286	-0.767	-0.085	1.442	-0.363	-0.151	0.693	-1.111	-0.671	-0.299	-1.277	-1.121	0.191	-0.267	-0.248
6450	0.644	-0.202	0.588	0.003	0.52	-1.047	-0.678	-0.172	0.373	-0.126	-1.269	0.324	-0.332	-1.271	-0.057	-0.178	-0.152	-1.262	0.93	-1.219	-0.903	-0.52	-0.007	0.439	-2.529	-0.363	-0.797	0.255	-0.462	0.531	-1.063	-0.823	-1.13	-1.064	0.382	0.856	-0.38	0.168	-0.784	0.871	-0.199	-0.763	-2.358	0.018	-0.928	0.265	0.299	0.013	-1.156
440995	-0.548	0.983	0.531	0.175	0.624	-0.043	0.334	0.052	3.53	-0.292	0.544	0.084	1.507	0.183	0.459	1.415	-0.359	2.012	0.435	0.438	0.101	0.043	-0.102	0.261	1.334	-0.21	0.783	-0.93	-0.222	-0.498	0.902	-0.554	-0.366	0.336	2.537	0.869	-0.066	1.602	-0.301	-0.745	-1.198	3.97	0.096	-0.177	-0.205	-0.481	2.369	0.852	1.688
1033	2.737	5.221	4.658	1.513	3.358	3.339	2.839	3.727	3.477	2.67	3.593	3.077	2.584	2.908	4.705	5.895	2.311	3.802	3.729	4.921	2.777	2.425	3.356	2.347	4.792	2.557	3.492	0.904	3.869	2.488	4.144	2.868	3.295	3.713	3.757	4.058	2.446	4.413	4.375	2.649	1.684	0.808	3.668	2.977	3.075	3.089	2.73	3.313	4.514
140885	-1.66	-0.216	-1.823	-0.824	-0.762	-0.171	0.301	-0.812	-1.284	0.505	0.204	-0.344	-0.737	-0.54	-1.523	-2.014	0.414	-1.048	-0.939	0.039	0.341	-0.656	-1.063	0.14	0.209	1.159	1.039	-1.073	-0.204	-0.59	-0.033	-0.836	-0.211	0.142	0.12	-0.532	0.318	-0.509	-1.005	-1.123	-0.345	0.977	0.67	0.359	0.141	-0.276	0.77	0.683	-0.158
4839	-0.549	1.478	-0.212	-0.548	1.168	0.809	0.613	-0.425	0.38	0.294	0.181	0.233	0.1	0.407	0.777	1.468	0.719	0.527	-0.427	1.369	0.373	0.915	0.78	-0.526	1.487	0.879	1.027	0.19	0.032	0.876	-0.461	-1.345	0.666	0.615	-0.314	-0.273	0.739	0.738	-0.938	-1.809	-0.487	-0.017	1.177	0.515	1.531	-0.837	0.841	0.985	0.563
1373	-0.248	-8.526	-0.034	-0.068	-4.18	-0.996	0.186	-0.333	0.008	-1.42	-1.318	0.066	-0.788	-1.901	0.187	-0.495	-2.358	-1.162	-0.618	0.575	-2.359	0.263	-0.212	-0.015	-2.365	-1.177	-2.279	-0.445	-0.097	-1.438	-0.841	-1.829	-4.436	-1.259	-1.479	-0.806	0.445	-0.473	-0.675	-0.615	-0.254	-4.226	-7.78	-1.162	-0.042	-0.187	-3.567	-1.939	-3.832
51665	0.389	1.072	-0.254	0.181	1.014	0.637	-0.729	0.119	0.786	-0.779	0.591	-0.004	0.148	0.329	0.918	-0.527	1.092	0.684	-0.678	1.789	-0.046	0.349	0.038	-1.272	1.469	0.216	0.905	-0.847	0.127	-0.594	1.122	-0.346	0.572	0.261	0.023	0.331	0.228	0.057	-0.014	-1.308	-0.852	-0.434	0.115	-0.103	-0.453	0.263	-0.395	-1.152	0.094
81550	0.099	-1.489	0.506	-0.754	0.201	0.219	1.13	-0.488	-0.496	0.383	0.13	0.558	0.076	0.373	-0.059	0.201	-1.197	0.37	-0.05	-0.318	-0.046	-0.385	0.179	0.722	-1.001	0.024	-0.724	0.292	0.664	0.285	-0.351	0.701	-0.836	-0.235	-0.704	0.221	0.177	0.382	0.31	0.961	-0.951	-0.486	-0.888	0.272	0.776	0.13	-0.639	-0.428	-0.283
92283	0.084	1.103	1.034	-1.36	1.001	0.594	0.814	-0.31	1.155	-0.278	1.075	0.841	1.259	1.533	0.994	0.344	0.752	0.258	0.21	2.122	0.822	2.117	0.347	0.707	2.177	2.454	0.894	-0.634	3.036	1.128	0.639	-0.294	1.038	2.325	2.218	1.475	0.147	1.229	1.756	0.268	0.71	1.794	1.166	1.187	0.434	0.186	0.095	1.843	1.628
2978	-0.261	0.281	-0.217	0.259	-0.139	-0.365	0.082	-0.236	0.19	-0.069	-0.348	-0.005	-0.179	0.057	0.078	0.404	0.197	0.292	-0.134	-0.127	-0.304	0.119	-0.123	-0.249	0.104	0.176	-0.009	0.288	-0.215	0.307	-0.001	-0.203	-0.293	-0.345	-0.037	0.039	0.023	-0.09	-0.249	0.283	-0.477	0.167	0.121	-0.564	0.086	-0.101	-0.277	0.089	-0.18
113000	0.317	1.005	0.254	0.706	0.394	0.076	0.785	0.044	0.115	0.95	-0.402	0.094	-0.298	0.269	0.107	1.218	0.25	0.597	1.112	0.656	0.132	-0.495	0.096	-0.152	0.294	1.551	-0.125	1.281	-0.114	0.434	-0.152	0.451	0.035	1.08	0.384	-0.485	1.076	0.374	-0.068	-0.239	0.536	0.917	0.131	1.335	0.038	-0.449	0.989	-0.033	0.271
283385	-0.19	-0.191	-0.443	-0.434	-0.371	0.051	-0.264	-0.576	-0.137	0.144	-0.22	-0.423	-0.169	0.06	0.375	-0.092	-0.507	-0.541	-0.094	-0.044	-0.012	-0.47	-0.29	-0.104	-0.174	0.013	-0.548	-0.29	-0.304	-0.062	-0.118	-0.124	-0.736	0.019	-0.193	-0.063	0.774	-0.078	-0.053	-0.456	-0.069	0.004	-0.452	0.189	-0.148	-0.419	-0.021	-0.271	0.127
27034	-0.222	-0.779	-0.785	-0.057	-0.672	-0.294	-0.472	-0.191	-0.846	-0.237	-0.826	0.604	-1.003	-0.517	-0.721	-0.805	0.035	-0.817	-0.621	-1.145	-0.663	-0.323	-0.228	0.471	0.228	-0.644	-1.382	0.044	-0.912	-0.389	0.156	-0.36	-0.278	-0.881	-0.447	0.086	-0.365	-0.798	-0.207	-0.373	-0.51	-0.389	-1.045	-1.023	-0.703	-0.587	-0.54	-0.6	-0.958
339291	0.394	0.103	-0.325	0.083	0.136	-0.864	0.183	-0.092	0.126	-0.12	-0.333	0.312	0.127	0.011	-0.216	-0.216	0.143	-0.063	0.083	0.13	-0.249	-0.59	-0.114	0.072	0.062	0.606	-0.132	0.344	0.14	0.168	-0.017	-0.19	-0.374	-0.537	-0.457	-0.263	0.088	0.432	0.177	0.35	0.436	0.101	0.106	-0.26	0.047	-0.157	-0.115	-0.021	-0.269
348327	-0.816	0.342	1.22	0.546	0.977	-0.508	0.363	1.335	0.214	-0.503	1.087	-1.421	0.127	-0.272	1.193	1.43	1.082	0.508	1.23	1.847	0.852	1.983	0.528	1.987	3.063	1.667	0.81	-1.696	2.075	-0.306	0.381	-0.911	1.013	0.404	1.723	0.117	0.297	0.016	1.896	0.704	1.719	3.33	0.876	0.048	1.043	0.35	1.255	1.116	0.585
728962	0.219	0.073	0.484	0.129	0.378	0.243	-0.339	0.252	0.072	0.077	-0.65	0.149	0.55	0.898	0.525	0.288	-0.396	0.223	0.018	0.082	-0.306	-0.03	-0.063	0.46	0.1	-0.459	-0.181	-0.085	0.558	-0.057	-0.067	-0.654	0.233	-0.928	-0.397	0.004	-0.145	0.424	-0.312	0.681	-0.26	-0.082	0.27	-0.534	0.189	-0.314	0.053	-0.315	0.642
387720	-0.076	-0.423	0.584	1.047	-0.246	-0.221	-0.203	-0.19	0.132	0.077	0.249	0.301	0.203	0.853	-0.015	-0.224	0.34	-0.108	0.148	0.366	-0.192	0.46	-0.542	0.661	0.172	-0.043	-0.065	0.059	-0.064	0.134	-0.301	-0.493	0.281	-0.156	0.005	-0.177	0.234	0.023	0.055	0.66	0.388	-0.688	0.685	0.024	0.205	0.137	0.265	0.195	0.146
79958	0.989	0.682	-0.586	-0.111	-1.858	1.577	0.329	-0.321	-0.638	1.057	0.834	-0.774	0.746	-0.624	-1.032	-0.442	-1.135	0.989	-0.473	-1.512	1.311	-1.506	-0.469	-0.58	-0.426	-0.363	1.147	-1.715	0.019	-1.145	-1.639	0.342	0.371	2.897	-0.317	-0.844	-0.364	-0.801	-0.172	-1.596	0.385	0.481	0.044	0.195	-0.065	1.197	0.583	-1.532	0.398
8788	0.075	-0.734	-1.191	-0.37	2.034	3.959	-2.824	0.013	9.108	-5.014	-1.917	-0.096	9.314	2.945	1.223	-0.317	-1.623	9.889	-0.827	-0.452	-3.069	0.41	0.135	-2.35	7.082	0.043	2.775	-5.607	4.28	0.277	0.67	-2.219	4.267	1.823	0.454	5.541	-3.889	-0.42	1.043	-3.48	-8.02	0.243	0.502	-0.207	-1.971	-0.087	-0.582	-0.854	8.037
51760	0.279	0.451	-0.297	0.381	-0.413	0.692	2.225	0.703	1.369	1.558	0.129	-3.336	1.312	-1.882	-1.669	1.04	1.226	-1.035	-1.747	-0.502	0.817	-2.328	-0.704	0.943	1.47	0.781	-1.001	-0.254	0.195	-2.025	1.476	1.193	-0.954	0.088	1.563	-0.01	-1.713	1.587	-2.871	0.466	2.014	-0.771	0.144	1.694	-1.851	-0.969	0.371	0.336	1.208
2531	-1.729	-1.051	-1.392	0.224	-0.594	-0.994	-0.335	-1.744	-1.613	0.099	0.11	0.429	-0.889	-0.595	-0.019	-0.432	-1.503	-1.277	-1.107	-1.324	-0.928	-0.911	-0.558	-0.368	-1.405	0.342	-2.016	0.035	-1.315	-0.383	-0.094	0.109	-0.745	-1.768	-1.47	-1.131	-0.195	-0.386	-0.502	-0.824	-0.907	-0.189	-1.097	-0.221	-1.173	-0.628	-0.249	-0.393	-0.707
7165	-0.002	1.63	0.133	-0.703	0.879	1.163	0.755	0.538	0.862	0.182	0.471	-0.166	0.121	0.88	0.749	0.654	0.783	0.838	0.529	1.486	-0.035	0.911	0.805	0.343	1.516	0.841	0.892	0.19	1.298	0.696	0.633	-0.166	0.954	0.87	0.606	0.732	0.502	0.681	0.342	0.386	0.517	2.579	1.623	0.721	0.608	-0.273	1.402	0.586	0.395
649159	-0.485	0.06	-0.415	0.249	0.221	-0.733	0.337	-0.301	0.312	0.176	-0.338	0.382	-0.261	-0.242	-0.078	0.226	0.594	-0.201	-0.402	0.206	-0.045	-0.494	-0.478	0.141	-0.155	0.35	-0.506	-0.269	-0.176	-0.788	-0.128	-0.631	0.057	-0.466	-0.077	-0.167	-0.2	0.211	-0.272	-0.19	0.168	0.453	0.138	-0.528	0.086	-0.323	0.215	-0.105	0.453
7008	2.742	-0.103	0.609	1.281	-0.64	-0.783	2.533	-0.025	2.195	-0.115	0.57	0.987	0.775	2.169	1.665	1.846	1.718	1.237	1.277	0.699	-0.01	-1.091	0.663	1.939	0.358	2.228	-1.104	1.381	0.954	1.753	1.099	2.486	-0.313	0.623	0.768	0.623	-0.34	-0.331	0.942	2.544	0.062	0.853	-1.009	1.196	-0.158	1.715	0.297	0.393	0.116
84803	-1.537	-2.809	-0.828	0.297	-0.153	-1.457	0.311	-2.048	-2.551	-2.326	0.517	0.177	-4.857	-2.061	1.473	0.325	-1.616	-3.147	-1.382	-2.39	-1.108	-1.233	-1.425	-0.976	-0.256	-2.146	-1.103	-0.095	-0.908	-0.14	-0.173	-3.131	-2.206	-4.229	-2.045	-4.39	0.123	-0.043	-1.639	-2.465	-1.545	-4.572	-0.642	-3.035	-0.396	-1.287	0.346	-4.497	-3.517
58494	0.378	-2.489	-0.89	-0.186	-1.441	0.301	-2.684	-1.819	-2.453	-1.638	-0.124	-1.456	-0.226	-0.271	-0.947	-1.305	-1.745	-0.031	-1.091	-0.523	0.206	0.078	-0.081	-0.796	0.366	-1.232	-0.716	-2.232	-0.893	-0.962	-1.618	0.085	0.853	0.263	-2.88	-0.366	-1.788	-2.138	-1.17	-0.741	-1.793	-0.841	-1.93	0.162	-0.072	0.459	-0.948	-0.615	0.551
8906	-0.296	0.973	-1.888	0.353	-0.473	0.932	-1.832	0.701	1.364	0.353	0.202	-2.29	1.384	-0.613	1.164	-0.015	-0.772	1.838	-0.112	1.026	0.361	-0.412	-0.451	-0.477	0.445	-1.209	-0.494	-3.291	-2.181	-1.505	-1.939	0.463	-0.069	1.47	0.73	0.712	-1.034	0.047	0.906	0.063	0.33	-0.085	0.662	0.319	-0.751	0.721	-0.084	-1.441	1.961
721	-0.049	-0.406	0.539	-1.89	-0.242	-0.518	1.04	0.643	-0.833	-0.196	-0.299	-1.014	-0.517	0.396	1.348	-2.243	-0.983	-1.977	-0.097	0.473	-0.96	0.997	-0.678	0.808	0.491	-0.549	-1.16	0.421	1.759	0.624	0.388	-1.166	-0.09	-1.208	-0.798	-1.231	0.214	-1.277	-0.597	0.645	0.149	-1.121	-0.064	-1.538	-0.293	-0.589	-0.863	0.982	-2.199
642350	-0.32	0.257	-0.029	-0.747	0.373	-0.567	-0.268	0.186	0.118	0.166	-0.095	-0.156	-0.724	0.313	0.997	0.912	0.648	-0.214	0.302	0.882	0.475	0.299	-0.159	0.008	0.992	0.178	-0.461	1.871	-0.33	0.552	-0.005	-0.086	0.453	-0.403	1.039	-0.099	0.933	-0.357	-0.205	-0.379	1.046	0.16	0.922	-0.307	2.065	0.349	-0.449	0.01	-0.33
128486	0.33	2.575	1.054	0.15	1.054	-0.483	1.834	0.122	0.649	-0.212	-0.546	0.866	0.168	0.855	1.254	0.985	0.924	0.421	1.138	0.501	0.232	-0.469	1.526	0.418	0.935	0.997	-0.006	1.898	0.141	1.377	1.618	1.633	0.325	0.422	0.765	-0.963	1.081	0.678	0.415	0.99	-0.417	1.556	-0.631	0.711	0.65	-0.165	0.886	0.348	-0.415
64101	-1.824	-2.286	-2.654	-0.528	-2.179	-2.354	-1.125	-1.729	-2.83	-1.858	-0.42	-2.793	-1.868	0.341	-2.343	-2.278	-2.315	-0.964	-1.743	1.61	-1.846	-1.523	-1.252	0.168	-1.837	-0.646	-1.254	-2.009	-1.419	-1.659	-1.5	-1.914	-1.453	-1.084	-3.217	-1.856	-2.173	-3.567	-0.287	-0.32	-2.132	-2.466	-1.381	-2.517	-2.681	-2.394	-0.166	-2.104	-1.967
51527	-1.156	-0.15	-0.492	-0.548	0.83	-0.888	-0.693	1.147	-0.73	0.093	0.761	-0.79	-0.238	0.581	0.078	-0.101	0.627	-0.306	-0.107	0.748	0.559	0.459	-0.27	-0.615	1.027	-0.321	1.293	-1	-1.186	-0.078	0.834	0.636	0.421	-0.283	1.053	-0.036	-0.226	0.02	-0.39	-0.717	-0.26	0.693	-0.014	0.386	0.302	-0.376	0.17	0.77	-0.244
6083	-0.796	-0.612	-1.568	-0.667	-0.191	-0.542	-0.838	-0.413	-1.604	-1.625	0.465	0.62	0.538	-0.696	0.336	0.372	-1.563	1.04	-1.027	2.128	0.957	0.814	-0.063	-0.704	0.56	-0.719	1.318	-0.543	0.689	-1.747	-1.299	1.344	0.456	0.114	-0.595	0.03	-0.889	-1.46	0.414	-1.971	-0.163	-2.881	0.505	-0.816	0.298	-0.029	0.322	0.332	-0.57
838	-0.296	0.426	-1.194	-0.517	0.115	-0.916	-1.829	0.804	-1.669	0.261	0.678	-0.802	-0.639	-0.437	0.342	-0.243	0.435	0.767	-1.288	0.054	0.038	-0.549	-0.677	-0.127	2.101	-0.333	2.463	0.004	-1.305	-0.164	-1.195	-1.882	0.547	1.945	0.532	-1.692	2.529	-1.864	-0.533	-1.13	-0.653	0.531	-0.269	-0.26	-0.363	-0.124	-0.529	-0.622	-0.367
399744	-0.334	0.068	-0.149	0.521	0.27	-0.579	0.88	-0.478	0.344	-0.112	-1.045	0.278	0.066	-0.173	-0.167	-0.611	0.102	0.165	-0.974	-0.555	-0.347	-0.937	-0.464	-0.34	-0.144	-0.005	-1.321	0.271	-0.046	-0.473	-0.349	0.224	-0.569	0.016	-0.845	0.625	-0.204	0.457	-0.457	-0.296	0.45	1.111	-0.723	0.238	-1.052	-0.568	-0.493	-0.715	0.353
9855	-1.02	-0.328	-0.854	0.385	-0.593	-0.948	-0.304	-0.735	-0.082	0.61	-0.909	-0.353	-0.949	-0.142	-0.425	-0.689	-1.485	-0.182	-0.258	-0.261	-0.513	-0.845	-0.774	0.341	-1.261	1.141	-1.082	-0.141	-1.158	0.135	-1.288	0.214	0.126	0.118	-0.372	0.096	-0.027	-0.787	-1.042	-0.656	-0.717	-1.542	-1.862	0.582	-0.445	-0.112	-0.794	-0.627	-0.611
80313	-0.02	-0.512	0.131	-0.39	-1.122	-0.292	-0.739	-0.395	-0.078	-0.06	-0.187	0.106	0.437	-0.214	-0.498	0.62	-0.823	0.342	0.432	0.301	0.239	0.814	0.578	-1.113	-0.313	-0.02	-0.631	0.477	0.893	1.167	-0.581	0.341	0.311	0.134	0.375	0.015	0.12	-1.212	0.783	-0.421	0.167	0.365	0.168	-0.375	-0.247	-0.352	-0.343	-0.203	0.115
56980	0.21	0.155	0.38	0.314	0.322	0.226	-0.191	0.899	0.177	-0.195	0.05	0.34	0.631	-0.285	0.255	0.169	0.414	0.303	0.862	-0.063	0.177	0.264	0.261	-0.049	0.861	0.749	0.477	-0.027	0.601	0.165	0.424	1.472	0.234	1.199	0.136	0.63	-0.149	0.678	0.752	0.972	0.127	-0.266	-0.254	0.23	-0.02	0.383	0.116	0.25	-0.107
9456	1.349	2.159	-1.386	0.013	1.897	1.566	-2.484	-0.232	2.421	-1.282	1.843	-2.217	2.101	2.792	5.314	-1.082	1.021	1.952	1.482	0.553	-0.154	-0.522	0.26	-2.908	0.84	-1.298	2.731	0.706	-0.727	-1.105	1.269	-0.561	1.535	-1.735	0.799	2.105	0.178	1.598	0.625	1.555	1.057	0.415	2.669	-1.626	1.635	0.733	1.245	0.586	2.813
57560	-1.128	0.795	0.96	0.442	0.336	0.986	0.125	1.308	-0.361	0.003	0.772	0.926	0.874	-0.196	-0.513	-0.301	1.462	0.666	1.073	-0.568	0.802	-0.246	-0.218	0.674	0.531	1.405	0.651	-0.604	-2.025	-0.73	0.514	1.799	0.818	1.727	1.802	0.646	-0.725	0.031	0.146	-0.051	1.286	1.548	1.589	2.363	-0.278	1.355	0.552	1.549	0.191
56259	0.739	-0.278	0.057	-0.355	0.266	0.058	0.504	-0.322	0.714	-0.088	-0.452	-0.32	-0.068	0.144	-0.016	0.279	-0.288	-0.365	0.207	0.753	0.387	-1.163	0.337	0.023	0.293	-0.272	-0.44	2.425	-0.031	1.736	-0.392	-0.748	0.241	0.239	-0.045	0.407	0.81	0.557	-0.5	-0.302	0.738	-0.868	-0.463	-0.239	-0.9	-0.022	-0.272	0.144	0.341
245932	0.034	-0.075	0.312	-0.27	-0.132	-0.198	-0.338	-0.548	-0.276	-0.5	-0.152	0.138	-0.189	0.014	0.31	-0.71	-0.139	0.318	-0.195	0.357	-0.638	-0.18	-0.268	0.128	-0.268	0.591	-0.669	0.648	0.097	0.051	-0.066	-0.716	-0.092	-1.248	-0.131	-0.065	-0.231	-0.266	-0.403	0.034	-0.404	0.349	-0.374	-0.343	-0.089	-0.054	-0.024	-0.533	-0.07
116	0.017	0.402	-0.108	0.183	-1.657	-0.295	-0.707	-0.283	0.04	0.112	-0.332	-0.761	-0.014	0.239	-0.943	0.517	-0.445	0.112	-1.191	0.199	-0.253	-0.531	0.676	-0.774	-0.866	-0.542	0.371	-0.028	-1.768	0.317	-1.554	-0.846	-1.382	0.384	-2.55	-0.155	-2.275	-0.903	-0.478	-0.201	-0.025	-0.393	-0.068	0.003	-1.805	-0.189	-1.036	-0.17	0.334
65065	-0.07	-0.89	0.706	-1.904	-0.71	0.356	-0.167	0.497	-0.573	0.936	-0.171	0.814	0.7	0.442	0.372	0.671	-1.543	-0.729	0.362	0.686	-0.202	1.991	0.075	1.389	-1.014	-0.483	-0.324	-0.354	0.508	-0.074	-0.088	-0.608	0.238	-0.516	0.047	-0.857	-0.419	0.673	-0.035	2.019	0.57	-1.41	-0.575	-0.883	-0.336	0.809	-0.544	0.316	-1.392
9895	0.863	1.507	-0.263	0.549	0.132	-0.865	1.117	-0.046	2.057	2.122	0.374	1.099	0.74	0.888	-0.537	1.804	-0.012	1.35	0.822	1.259	-0.182	0.655	0.775	2.187	-0.319	2.87	0.01	-0.33	1.505	-0.067	1.269	-0.207	-0.941	0.489	2.107	0.937	-1.164	1.349	0.527	2.602	-0.612	1.548	-0.425	1.918	0.234	0.489	0.631	-0.254	-0.109
144132	-0.625	-0.534	0.506	0.697	0.383	-0.004	1.173	-1.822	1.212	0.327	-1.049	1.937	1.847	0.592	-0.062	-0.189	0.311	0.716	0.754	-0.61	0.466	-0.655	0.326	0.409	-0.229	0.589	-0.023	1.751	-1.676	0.763	-0.252	2.346	0.096	1.637	0.777	-0.375	0.26	0.635	-0.23	0.88	0.84	0.418	0.002	1.889	0.959	-1.031	0.671	-0.486	-0.684
83636	0.51	-0.103	-0.014	-0.178	-0.328	-0.311	-0.035	0.665	-0.031	1.437	-0.555	-0.045	-0.405	-1.156	-0.239	0.939	1.047	-0.486	0.83	1.12	1.095	-0.038	-0.803	0.075	1.484	0.564	-0.166	1.074	-0.601	0.196	0.242	-0.463	-0.113	0.247	-0.688	-0.583	0.214	-0.262	-1.801	-1.043	-0.873	-0.717	-1.084	0.17	-0.45	-0.071	-0.943	-0.075	-0.553
55638	0.616	0.009	1.348	1.657	-2.112	-0.693	-0.89	-0.737	0.412	-0.514	-1.024	0.453	-1.169	1.317	-3.32	-1.998	-0.484	-4.882	2.17	-1.929	-0.349	1.061	1.863	-1.288	-3.199	-0.069	-3.589	0.99	0.225	0.404	-0.13	0.98	-1.68	-1.621	-0.47	-0.146	1.095	-0.523	-1.181	1.985	-1.129	-2.123	-1.905	-0.435	0.346	0.903	1.226	-1.273	-2
440730	-0.408	0.183	-0.117	0.036	1.333	0.021	0.616	-0.349	0.949	-0.008	0.352	0.291	0.258	-0.26	-0.38	0.053	0.195	-0.34	-0.579	-0.17	0.044	0.029	0.107	-0.12	-0.331	0.194	0.645	-0.422	0.033	0.361	-0.134	-0.3	-0.525	-0.532	0.183	-0.127	-0.145	0.305	-0.185	-0.127	0.034	0.317	-0.253	0.222	-0.082	-0.386	-0.668	0.152	0.3
816	-0.593	-2.486	-1.962	0.309	-0.641	-1.958	-1.108	-1.739	0.151	-1.141	-1.903	-1.013	-1.889	0.742	-1.993	-1.728	-1.566	-2.357	-1.976	-2.542	-1.708	0.253	-2.016	-1.749	-1.639	-0.076	-2.143	-0.966	-1.609	0.722	-1.919	-0.569	-1.763	-1.714	-0.028	-1.582	-0.573	-0.843	-2.106	-1.75	-1.138	-2.063	-1.995	0.742	-1.489	-1.169	-1.994	-0.948	-1.613
8320	-0.479	-4.401	-1.63	-1.305	-2.571	0.791	-2.842	0.033	-2.829	-1.697	0.775	-3.126	-1.693	-0.912	-0.392	-2.89	-3.253	-1.023	-2.087	-1.305	0.884	-3.281	-2.164	-1.426	-1.541	-1.652	-0.724	-1.441	-1.307	-1.439	-3.995	-0.834	0.129	2.716	-3.133	-3.295	0.09	-2.567	-0.834	-2.759	-1.712	-2.381	-3.099	0.115	-0.661	1.147	-0.831	-4.561	-3.19
55633	0.799	1.141	1.152	-0.303	0.471	0.943	0.706	0.285	0.396	0.305	1.693	-0.216	0.811	0.62	0.046	0.86	1.051	1.093	1.153	0.674	0.46	0.977	0.615	0.692	0.665	0.335	0.367	0.183	2.321	-0.29	0.575	0.992	0.356	1.098	0.704	0.641	-0.039	0.285	0.692	0.518	0.306	1.836	0.908	0.583	0.641	0.087	0.59	0.861	0.108
58530	-0.048	0.136	-0.001	0.167	-0.121	-0.391	-0.279	-0.394	-0.021	-0.152	-0.203	-0.131	-0.422	-0.127	0.299	-0.242	0.021	-0.161	-0.04	-0.183	-0.59	-0.291	-0.099	-0.069	-0.137	0.04	-0.674	0.077	-0.122	0.098	0.143	-0.457	-0.385	-0.337	-0.122	-0.044	0.319	0.461	-0.318	-0.006	-0.396	0.087	0.218	-0.635	0.083	-0.378	-0.443	-0.311	0.049
340351	0.558	2.29	0.532	-0.782	0.255	1.253	0.593	1.025	0.895	2.023	1.281	0.628	2.125	0.682	-0.165	1.501	0.927	2.663	0.861	0.547	1.654	0.822	0.044	1.307	0.411	1.829	2.389	-0.26	1.718	-1.086	0.958	1.926	1.924	2.502	0.772	1.827	0.52	0.181	1.689	0.662	0.896	2.601	1.751	1.775	1.627	1.71	0.224	0.892	2.634
846	2.35	-0.764	-1.221	-1.737	-3.632	-0.383	1.135	3.338	-1.654	-0.465	0.316	-0.954	-0.785	-0.562	-1.295	-1.076	1.506	-1.133	-1.083	-0.984	1.175	-1.297	-2.156	-2.158	-2.476	-0.924	-0.755	-1.785	-1.251	-0.367	-2.776	-0.783	-2.98	-0.915	-1.815	-2.469	-3.268	-1.669	-1.596	-1.814	0.36	0.512	-1.732	-0.494	-1.147	-0.17	-1.379	-2.002	-0.012
28513	-0.474	-3.864	-2.787	-1.06	-4.453	-1.923	-2.034	-2.616	-3.345	-2.446	0.273	-2.328	-1.802	-0.551	-2.912	-2.848	-1.443	-1.961	-4.59	-1.741	-3.326	-3.541	-0.903	-2.72	-0.974	-3.908	-1.54	-2.604	-2.002	-3.049	-2.252	-0.863	-2.006	-2.926	-2.999	-3.48	-3.825	-3.195	-3.001	-2.834	0.796	-2.695	-3.98	-2.542	-3.181	-3.823	-3.317	-3.221	-1.997
731082	-0.203	0.965	0.634	-1.199	0.442	-0.08	-0.019	1.093	0.725	0.762	1.181	0.223	-0.118	0.009	0.534	1.501	0.427	0.715	0.456	-0.196	0.432	0.297	0.077	-0.266	0.488	0.023	0.557	0.663	1.054	0.19	0.875	0.473	1.061	0.559	0.458	0.779	-0.074	0.873	0.963	0.735	1.165	2.578	0.658	-0.362	0.178	0.36	-0.238	0.902	1.605
389692	-0.213	0.22	-0.219	-0.199	0.166	-0.153	0.13	-0.432	0.19	0.414	-0.586	-0.2	-0.185	0.209	0.061	0.132	-0.099	-0.319	-0.089	0.1	-0.24	0.33	-0.299	0.205	0.588	0.667	-0.263	0.045	0.815	0.291	0.182	-0.573	-0.54	-0.143	0.335	0.171	0.365	0.621	-0.478	-0.051	-0.205	0.733	0.021	-0.624	-0.277	-0.191	-0.524	-0.143	0.127
6572	0.163	-0.148	0.073	-0.003	0.302	-0.648	0.046	-0.598	0.176	-0.018	-0.765	0.184	-0.245	-0.343	0.501	-0.342	-0.339	-0.19	0.258	-0.341	-0.63	-0.121	0.096	-0.233	0.131	-0.074	-0.064	-0.227	-0.196	-0.266	0.296	-0.876	-0.419	-0.21	-0.547	-0.382	0.936	0.443	0.201	0.85	0.523	0.223	-0.021	-0.926	-0.199	-0.73	0.117	-0.067	-0.063
10203	0.392	-0.608	0.126	0.072	0.244	0.962	-0.518	-0.205	0.133	-0.604	1.158	0.527	1.182	-0.99	-0.368	-0.529	0.017	0.48	-0.377	1.932	1.693	1.327	0.824	1.524	-0.619	0.365	0.797	-0.104	-0.057	-0.933	0.441	1.611	0.418	0.917	-1.104	0.848	-0.774	-0.182	-0.417	-0.797	-0.427	-2.698	-0.566	0.986	0.282	0.548	-0.102	1.239	1.22
387882	1.723	1.555	0.096	-0.753	-1.405	1.944	-0.576	3.716	-1.379	-0.74	2.92	-1.653	-0.071	-0.426	-2.444	3.509	3.264	1.169	2.418	-0.813	1.16	0.761	0.464	-0.802	-0.249	-1.441	2.124	-0.569	0.052	-0.86	0.719	2.658	-0.042	1.805	1.394	-1.352	-1.503	2.488	2.334	0.21	-0.397	3.81	0.375	1.254	0.476	2.497	-1.22	1.781	1.974
729464	-0.119	0.008	-0.459	0.122	-0.007	0.353	-0.443	0.116	-0.189	-0.406	-1.109	0.03	-0.131	-0.96	0.188	-0.266	-0.397	-0.166	-0.105	-0.047	-0.646	-0.113	-0.26	0.096	-0.074	-0.033	0.33	0.794	0.028	-0.097	-0.011	-0.198	-0.326	-0.238	-0.378	-0.732	-0.288	-0.131	-0.533	0.086	0.017	0.352	-0.251	-0.398	-0.288	0.03	-0.131	-0.007	0.186
400499	-0.111	0.146	0.38	0.237	-0.092	0.281	0.239	-0.237	-0.058	0.116	-0.649	0.064	0.055	0.416	0.803	0.07	-0.153	0.053	0.189	0.011	-0.739	-0.008	0.248	0.004	-0.527	0.509	0.201	0.41	-0.166	0.049	-0.043	-0.592	-0.136	-0.741	0.229	-0.361	-0.04	0.428	-0.923	0.16	-0.443	0.067	-0.311	-0.68	-0.442	-0.852	-0.077	-0.111	0.206
30812	0.16	-0.518	-0.87	-0.216	-2.434	0.945	-0.107	-0.466	-1.087	0.35	0.781	-0.649	0.252	-0.656	-0.367	-1.182	-0.552	0.425	-0.521	-0.839	0.229	0.062	0.306	-1.068	-1.098	-0.39	-2.16	-0.72	-0.54	-0.675	-1.206	0.336	-0.456	0.601	-0.828	-0.359	-1.008	-0.337	-0.774	-0.019	-2.579	-0.804	-1.324	-0.04	1.464	-0.162	-0.682	-0.412	-0.32
4166	-0.511	1.176	-0.518	0.452	-0.656	0.152	-0.47	-0.016	0.407	-0.04	0.253	0.013	-0.581	0.326	1.439	0.6	0.56	0.628	0.267	0.301	-0.202	-0.246	-0.164	0.268	0.832	0.387	0.823	-0.253	-0.252	-0.275	-0.012	-0.401	0.297	0.497	1.812	0.338	-0.154	0.832	-0.574	0.177	0.6	1.026	1.185	-0.187	0.181	-0.513	-0.387	0.163	0.121
[truncated: 1 more columns]

## Sheet: foldchange_matrix.simu
gene	Sample_0146	Sample_0175	Sample_0039	Sample_0038	Sample_0172	Sample_0071	Sample_0042	Sample_0011	Sample_0077	Sample_0163	Sample_0096	Sample_0092	Sample_0070	Sample_0270	Sample_0025	Sample_0119	Sample_0106	Sample_0159	Sample_0171	Sample_0108	Sample_0114	Sample_0148	Sample_0115	Sample_0160	Sample_0079	Sample_0090	Sample_0064	Sample_0072	Sample_0074	Sample_0174	Sample_0089	Sample_0073	Sample_0098	Sample_0068	Sample_0049	Sample_0062	Sample_0036	Sample_0116	Sample_0164	Sample_0275	Sample_0200	Sample_0156	Sample_0162	Sample_0128	Sample_0084	Sample_0161	Sample_0212	Sample_0203	Sample_0179
55319	-0.462	-0.309	0.638	0.175	1.239	-0.189	-0.862	0.11	-0.537	0.01	0.166	0.243	-0.311	0.427	1.27	0.521	-0.002	-0.2	0.297	-0.071	0.301	0.534	0.305	0.455	0.299	-0.193	1.095	0.431	0.579	0.514	-0.289	0.082	0.684	-0.081	-0.397	-0.833	0.218	-0.225	0.812	-0.508	-0.301	-1.213	0.453	-0.634	0.338	0.203	0.105	-0.479	0.502
83937	0.507	1.532	0.443	0.525	-1.082	1.432	-0.541	0.917	-1.079	-0.386	0.794	-0.892	0.493	0.459	0.446	0.89	0.974	0.213	0.607	-0.508	1.224	0.652	0.685	0.543	0.678	0.285	0.992	0.694	0.838	1.56	0.977	1.476	0.96	1.511	2.652	0.869	0.801	0.089	1.599	1.528	-0.34	1.709	0.452	0.922	0.938	1.072	0.961	1.222	1.644
10362	-0.2	0.77	0.432	0.323	-0.07	0.197	0.491	-0.455	1.265	0.47	-0.469	-0.125	-0.417	0.232	0.359	0.096	0.567	0.007	0.188	0.553	-0.164	-0.45	-0.063	0.295	0.616	0.829	-0.356	0.395	0.283	0.521	-0.357	0.356	0.376	-0.008	0.324	0.05	0.124	0.205	-0.367	-0.107	0.112	1.004	0.077	0.327	0.125	0.183	-0.046	-0.006	0.362
79635	2.686	1.039	1.612	0.835	0.88	-0.485	1.317	0.06	0.442	0.764	-0.787	2.32	1.19	0.766	1.214	0.918	-0.647	-0.728	1.242	-0.052	0.251	1.566	0.772	1.26	-0.018	1.665	-0.388	0.932	0.288	1.002	-0.02	2.358	0.384	-0.011	1.774	0.416	0.323	1.163	1.454	2.791	0.512	-0.207	0.186	0.027	0.202	1.537	2.105	0.817	0.721
8228	0.368	-0.797	-0.212	-0.15	0.769	-1.278	-0.657	-0.809	0.356	0.255	-1.125	0.301	-0.494	-0.556	-0.148	0.298	-0.437	-0.702	0.015	-0.896	-0.33	-0.162	-0.1	0.445	-1.261	0.171	-1.603	0.369	0.371	0.596	-0.161	-0.309	-1.156	-1.622	-0.205	-0.22	-0.27	0.163	-0.253	-0.212	-0.225	-2.637	-2.242	-0.639	-0.614	-0.169	-0.48	-0.63	-0.837
2648	0.326	1.963	0.93	0.299	0.848	0.387	0.48	-0.616	0.454	0.284	-0.133	1.146	1.043	0.417	0.26	0.735	0.68	1.377	1.578	-0.261	-0.026	0.653	0.878	0.176	-0.058	-0.039	0.729	0.661	0.333	0.539	-0.189	0.613	0.437	0.431	0.97	0.542	0.161	1.156	0.005	0.081	-0.417	1.224	0.81	0.876	0.932	-0.249	0.717	0.737	1.358
23254	0.133	-1.304	-1.088	0.012	-0.99	-0.474	0.195	-0.584	-1.233	-0.677	-0.791	-0.434	-0.501	-1.378	-1.07	-1.566	-1.04	-0.783	-0.606	-0.873	-1.364	-1.302	-0.417	-2.337	-1.424	-0.243	-0.849	-0.852	-0.484	-0.034	-1.38	-0.489	-0.671	-0.681	-0.707	-0.874	-1.641	-1.043	-0.939	-0.466	-1.772	-1.306	-1.438	-0.984	-0.005	-0.986	-1.797	-1.928	-0.504
10568	-0.01	-0.5	-0.206	0.126	0.214	-0.686	0.062	-0.283	-0.254	0.283	-0.026	-0.068	-0.009	0.15	0.059	0.118	0.35	-0.221	0.07	-0.071	0.068	-0.277	0.083	-0.108	0	0.139	-0.244	0.245	0.228	0.078	0.217	0.308	-0.548	-0.576	-0.298	0.05	0.39	-0.121	-0.426	0.708	-0.129	0.448	-0.15	-0.195	-0.072	-0.168	-0.663	-0.07	0.199
10071	-0.126	1.068	-0.935	-0.28	1.613	0.868	-0.803	-0.653	1.695	0.099	0.315	-0.611	1.03	0.122	-0.248	-0.351	0.404	0.444	0.485	0.017	0.05	-0.21	0.046	-0.417	-0.115	0.185	0.298	-0.268	-0.599	-0.395	-0.311	-0.414	-0.205	0.455	-0.055	1.019	-0.833	3.547	-0.22	-0.713	-0.424	-0.028	0.623	-0.504	-0.099	-0.223	1.387	-0.114	-0.012
10536	-0.058	-0.094	-0.7	-0.688	-0.778	0.94	-0.535	-0.426	0.499	-0.516	-0.192	-0.121	0.129	-0.609	-0.135	-0.72	-0.253	0.522	-0.165	-1.007	-0.532	-0.795	-0.313	-0.382	-0.128	-0.618	-0.541	-0.87	-0.433	-0.635	-0.616	-0.47	-0.14	-0.252	0.527	0.075	-0.954	0.001	-0.552	-0.234	-0.89	0.004	-0.631	-0.087	0.448	-0.21	-0.851	-0.478	0.091
1201	1.332	1.044	1.71	0.475	0.354	1.151	1.713	1.02	1.381	1.554	0.63	0.627	0.855	0.21	0.687	1.368	0.367	0.337	0.58	0.703	0.746	1.139	1.439	0.761	0.479	1.379	-0.023	0.724	1.421	1.278	0.31	0.643	-0.061	0.306	2.581	0.754	0.937	2.355	0.664	1.538	2.961	1.972	0.223	1.676	0.955	0.49	0.693	0.642	2.406
644591	0.204	1.699	0.057	0.172	1.903	0.591	0.341	0.43	0.504	-0.707	0.52	0.764	-0.09	-1.058	-1.241	-0.766	0.593	1.478	0.325	0.464	1.546	-0.882	-0.469	1.761	-0.086	-0.788	0.104	0.372	1.008	-1.17	0.575	0.485	-0.247	-0.361	-0.352	1.532	-0.814	-0.121	0.579	1.561	0.304	1.487	-0.43	1.256	-0.465	0.057	-0.238	0.105	1.097
115572	-0.119	0.001	-0.26	0.443	-0.089	0.206	0.823	-0.685	0.824	0.675	0.389	-0.333	0.413	-0.34	-0.049	0.194	0.802	-0.443	0.281	0.005	-0.285	0.185	0.148	-0.277	-0.551	0.173	0.683	-0.331	-0.486	-0.518	0.284	0.612	-0.039	0.186	1.048	0.581	-0.309	0.017	-0.207	-0.056	0.426	0.68	-0.359	-0.074	0.185	0.261	0.683	0.332	-0.505
26783	-0.535	0.392	0.943	0.351	1.416	-0.09	0.109	-1.054	-0.035	0.262	-0.352	0.157	-0.074	0.026	0.933	0.737	0.507	2.85	-0.153	0.498	0.3	0.855	0.782	0.012	1.009	0.23	1.435	-0.02	0.965	0.78	-0.183	-0.004	1.229	0.166	0.69	0.365	0.374	0.363	-0.207	-0.517	0.291	0.791	1.724	-0.115	0.529	-0.229	0.498	0.915	-0.027
5991	0.433	-0.299	-0.153	0.365	-0.015	0.696	-0.241	0.114	-0.039	-0.19	0.051	0.789	0.216	-0.089	0.398	-0.311	0.161	0.391	1.121	0.026	-0.004	-0.338	0.265	-0.13	0.304	-0.396	0.869	-0.389	0.554	-0.564	-0.42	0.831	0.624	1.093	-0.268	0.268	-0.766	-0.263	0.626	-0.471	0.586	0.284	1.025	-0.184	0.029	0.176	-0.052	0.063	0.471
26273	-0.013	-0.831	0.138	-0.102	0.503	-0.608	-0.507	-0.53	0.208	-0.258	-0.086	0.557	-0.326	-0.439	-0.018	-0.499	-0.846	-0.564	0.25	-1.203	0.13	0.881	0.373	-0.106	-0.536	0.148	-1.471	-0.325	0.392	0.096	-0.536	0.214	-0.541	-1.224	-0.514	-0.513	-0.205	0.034	0.329	0.122	-0.513	-1.597	-0.219	-0.082	-0.19	0.167	-0.264	-0.351	-0.157
8564	-1.03	-4.137	-1.863	0.173	-2.261	-2.096	-1.742	-2.783	-2.809	-0.882	-1.994	-0.153	-2.603	-3.317	-4.813	0.065	-1.979	-3.427	-3.745	-1.438	-1.87	-2.628	-4.744	-0.455	-3.252	-2.477	-2.508	-2.912	-2.491	-1.02	-0.265	-1.578	-3.725	-3.009	-2.186	-1.881	-2.246	-4.217	-1.728	-3.713	-4.917	-3.402	-4.313	-1.752	-3.371	0.101	-1.868	-1.358	-3.854
29984	-0.208	-0.515	-0.36	0.202	-0.297	0.687	-1.2	0.04	-1.328	0.958	-0.619	-0.615	-0.383	-0.834	-0.762	-0.565	1.495	-0.828	-0.675	-0.327	-0.885	0.443	0.226	-0.269	-0.65	0.727	-0.328	0.101	0.247	0.885	0.308	-0.484	-0.354	-0.554	-0.108	-0.381	0.76	0.309	-1.615	-0.633	-1.226	-1.146	1.868	1.754	0.133	-0.672	-0.141	1.231	0.188
4677	-0.495	-0.745	0.561	-0.803	1.25	-0.149	-0.626	-0.344	-0.434	-0.222	0.521	0.639	-1.22	-0.001	1.169	0.874	0.276	-0.418	0.638	0.101	-0.265	1.368	0.767	0.313	0.647	-0.197	0.235	0.34	0.343	0.655	0.937	-1.124	0.45	-1.108	-0.19	0.15	0.249	0.647	0.66	-0.98	0.179	-1.113	0.113	-0.232	0.561	-0.237	0.518	1.33	-1.23
84765	0.777	0.279	-1.919	-0.733	0.903	0.727	0.614	-0.821	0.951	-0.465	-0.744	0.772	1.707	-0.823	-1.61	-2.803	-0.387	1.464	-0.5	-0.869	0.654	0.598	0.636	1.295	1.644	-1.442	-0.583	-3.778	-0.907	-1.629	0.127	1.124	-0.274	0.968	-2.648	0.764	-0.609	-1.483	-1.44	2.147	-0.427	2.899	-1.638	-0.697	-1.415	0.382	-1.248	1.113	-0.842
92400	-0.353	-0.481	0.647	0.439	1.033	-0.587	-0.203	0.04	-0.026	-0.336	-0.477	0.768	-0.482	-0.391	0.274	0.151	0.245	-0.459	0.808	-0.223	-0.052	0.832	-0.216	-0.128	0.291	0.068	0.43	0.492	0.12	1.437	1.012	-0.78	-0.517	-0.17	0.285	-0.799	0.682	0.211	0.416	1.293	-0.208	-0.963	-0.755	-0.237	0.937	0.451	0.224	0.414	0.299
142940	0.448	-0.161	0.344	0.532	0.21	-0.961	-0.683	0.58	0.333	-0.739	-0.14	1.069	0.761	0.225	-0.403	0.51	-0.708	-0.401	-0.295	0.116	0.353	0.881	0.106	-0.592	-0.225	-0.315	-0.078	0.434	-0.055	-0.45	0.326	0.377	0.205	-0.876	0.52	0.531	0.398	0.188	0.573	0.911	-0.557	-0.194	-0.14	-0.615	-0.503	-0.637	-0.393	0.445	0.776
5159	1.559	-0.126	-0.032	-0.616	-0.3	2.08	-0.707	0.883	-0.391	0.028	1.414	-0.527	1.666	1.169	-0.368	-0.472	0.37	2.178	1.536	0.544	0.333	0.954	0.634	0.007	-0.378	-0.559	0.772	-1.269	1.697	0.676	0.173	2.408	0.291	1.797	0.357	1.434	-1.492	-0.481	-0.414	0.054	0.126	1.345	-0.057	1.208	2.197	1.659	-0.574	0.224	1
64173	-0.544	0.189	0.397	-0.563	-0.954	-0.438	0.945	-0.181	-1.393	0.246	-0.879	0.163	-0.917	-0.104	-1.921	0.121	-0.229	-0.875	-0.283	-0.135	-0.237	-1.235	-0.241	0.229	-1.465	0.423	-0.103	0.927	-0.503	-0.398	-0.197	0.457	-0.252	0.406	0.626	0.006	-0.232	-0.544	0.024	0.506	2.062	1.004	-0.339	0.881	-0.625	-0.227	-0.429	1.042	-0.725
3833	1.476	2.937	4.832	0.926	2.55	1.772	3.686	2.373	2.139	1.624	3.297	1.425	1.831	1.961	2.095	3.586	3.62	3.472	3.071	2.824	1.867	3.338	2.263	2.157	2.727	2.706	2.931	0.475	3.336	1.131	2.622	0.939	2.713	1.39	3.107	1.942	2.359	3.086	3.039	2.493	2.406	3.156	3.857	1.329	0.486	1.506	2.253	1.514	3.913
10855	-0.046	0.05	-0.226	0.183	-0.053	-0.23	-2.081	-0.404	-2.015	-1.315	0.621	-2.875	-0.645	-1.033	0.304	-0.508	-0.791	0.373	-0.532	0.258	-0.071	-0.511	-0.941	-0.643	0.206	-2.073	1.749	-1.207	-1.967	-0.712	-0.672	-1.093	-0.074	0.624	-2.772	-1.865	-0.376	-1.606	0.459	-0.994	-2.415	-2.381	0.159	-1.184	-0.544	0	2.333	-2.006	-0.456
90843	-1.128	-2.921	-1.944	-1.739	-1.434	0.639	0.013	0.545	1.462	-0.385	-0.394	-2.593	2.032	-1.532	-1.754	1.138	-2.065	0.311	-2.264	2.466	0.948	-0.978	-0.199	-2.199	0.969	0.584	0.165	-0.338	-1.904	-2.112	0.34	-1.243	-1.471	-0.26	0.105	1.332	-0.949	-3.209	1.217	0.735	1.453	-5.196	-0.5	-0.075	0.611	-0.428	-1.45	-0.123	1.722
4772	0.348	0.875	-1.44	0.304	-0.832	0.864	-2.686	-0.309	-3.239	-0.326	0.842	-1.838	-0.184	-1.808	-0.951	-1.833	-0.66	-0.669	-1.558	-0.989	0.075	0.945	-0.4	-2.389	-1.817	-1.642	-0.569	-1.402	-0.152	0.129	-1.104	0.947	0.189	2.341	-1.114	-1.464	-0.894	0.15	-0.974	-2.721	-3.737	-1.387	-0.737	0.147	0.254	0.461	-0.082	-1.486	-0.008
7019	-0.087	-0.205	-0.076	-0.637	0.427	-1.068	-0.915	0.219	-0.346	-0.549	-0.378	0.051	0.622	0.178	0.726	-0.128	-0.954	-0.109	-0.627	1.093	-0.203	0.518	0.514	0.696	-0.061	-0.392	0.533	0.324	0.125	-0.179	0.148	-0.344	0.476	-0.969	-0.47	0.059	-0.05	-0.437	0.168	-0.95	0.39	0.052	0.499	-1.296	-0.56	-1.864	-0.217	0.176	-0.26
440498	-0.183	-0.744	-0.86	-0.22	-0.105	-1.163	-0.449	-0.997	-0.146	0.576	-0.721	-0.074	0.077	-1.701	0.182	0.077	-0.545	-0.141	0.384	-1.225	-1.624	-0.004	-0.095	0.165	-0.322	0.745	-0.703	-0.192	-0.768	-0.114	0.164	-0.405	-0.153	-1.691	-0.922	0.363	-0.098	-0.984	-0.395	-0.823	-0.047	0.286	0.349	-0.513	-0.807	0.049	0.152	-0.112	-0.114
65980	0.827	1.843	0.312	-0.046	-0.084	0.722	0.502	0.859	0.991	0.267	0.658	0.34	0.514	1.175	0.409	0.622	1.638	0.421	0.17	-0.045	0.365	1.09	0.967	0.503	0.865	0.444	1.356	0.818	0.44	0.147	0.645	0.508	1.086	0.958	1.338	0.797	0.456	0.008	1.259	-0.73	0.208	1.456	1.746	2.01	0.306	-0.101	0.566	1.072	0.581
149563	0.615	3.038	1.775	0.877	1.538	-0.363	0.008	-0.248	0.005	0.357	-0.881	1.347	0.621	0.701	0.163	-0.27	0.27	-0.567	-0.13	-0.06	-0.66	0.676	0.641	-0.171	0.606	0.042	3.269	2.311	4.647	5.749	-0.005	-0.171	2.985	0.332	0.078	0.108	1.979	-0.194	-0.408	0.116	0.06	1.163	2.48	-0.473	0.061	-0.133	-0.02	2.027	0.46
790955	0.186	-0.615	-0.222	-0.835	0.807	-0.442	0.475	0.025	-0.354	0.313	-0.815	0.214	-0.403	-0.063	0.467	0.022	0.075	-1.027	-0.11	-0.205	-0.093	0.042	0.244	0.648	1.157	0.305	0.537	0.001	0.727	0.48	0.4	-0.683	0.797	-1.018	0.123	0.275	0.505	-0.703	-0.38	-0.236	-0.569	-0.327	-0.071	-1.133	-0.075	-0.615	-0.617	0.755	-0.111
373861	-0.225	-0.033	-0.113	0.735	0.014	-0.469	-0.221	-0.345	0.135	-0.288	-0.463	0.035	0.028	-0.794	0.701	0.115	-0.038	-0.106	0.009	-0.109	-0.454	-0.293	0.144	0.232	-0.197	0.157	-0.428	0.323	-0.468	0.166	-0.178	-0.283	-0.125	-0.228	-0.11	-0.134	0.091	-0.346	-0.339	0.119	-0.092	-0.11	0.15	-0.167	-0.408	-0.235	-0.539	-0.224	0.318
131965	0.112	0.294	0.319	1.069	0.548	-0.009	-0.1	-0.734	-0.302	0.199	-0.881	0.185	0.048	-0.007	0.563	-0.191	0.106	-0.323	0.171	-0.237	-0.124	-0.384	0.353	-0.316	0.047	0.777	-0.166	0.456	-0.394	0.575	0.178	-0.39	-0.337	-0.201	0.17	-0.295	0.659	-0.294	-0.599	0.162	-0.088	-0.02	-0.101	0.508	-0.126	-0.108	-0.055	0.117	0.607
23132	-0.24	0.53	0.281	0.163	0.641	-0.642	1.625	-0.864	1.414	-0.5	-0.407	0.964	-0.441	0.587	0.633	0.41	0.512	0.211	0.595	-0.689	-0.099	-0.6	0.565	-0.229	0.038	1.422	-0.395	0.906	0.54	0.405	0.567	0.756	-0.067	0.037	0.046	0.593	0.005	0.656	-0.438	-0.418	0.828	1.859	0.194	1.218	0.644	0.043	-0.096	0.342	-0.065
728712	-0.092	-0.2	0.214	0.515	-0.098	0.059	0.152	-0.114	0.405	0.076	-0.05	0.118	-0.14	0.1	0.056	0.123	0.26	-0.353	-0.056	-0.102	-0.318	0.162	0.346	0.135	6.748	0.209	1.435	0.171	0.071	0.052	-0.159	-0.262	0.899	-0.026	0.306	0.239	0.746	0.382	0.531	-0.003	0.253	0.14	0.556	-0.087	-0.516	0.118	-0.378	0.002	0.276
148709	1.327	1.562	2.919	0.803	0.403	1.183	2.233	0.303	2.289	0.534	-1.097	2.153	1.786	-0.524	0.894	-0.275	1.677	-0.118	0.921	1.284	0.179	-0.005	1.904	2.162	0.248	2.135	-0.003	2.187	3.022	3.851	0.38	-0.071	-0.261	-0.337	1.078	1.516	1.558	1.244	0.177	1.85	2.394	1.955	-1.048	1.731	2.457	0.63	-0.917	1.134	2.585
84079	0.837	0.961	1.421	0.036	0.281	1.1	0.518	1.108	0.816	0.238	1.184	0.14	-0.239	1.063	1.005	1.256	1.621	1.425	3.439	0.858	0.637	0.874	0.815	0.247	1.858	0.093	1.611	0.636	0.553	0.87	1.195	0.971	1.074	0.944	1.236	-0.451	0.319	0.89	1.142	0.474	0.064	1.696	1.373	0.463	1.095	0.799	2.58	0.911	1.236
65084	0.644	-0.153	1.16	-1.214	1.886	-0.269	-0.212	0.529	-1.312	-0.148	-0.297	0.137	0.506	-1.187	-0.132	-0.076	0.714	-0.074	1.379	-0.784	0.168	0.675	0.191	0.019	0.046	-0.707	-0.234	0.587	-0.159	0.4	0.917	-0.778	0.231	-1.448	0.227	0.261	0.479	0.004	0.953	1.252	0.202	-1.394	-1.272	-1.736	-0.18	1.374	-0.339	0.491	-1.62
79725	-0.091	-1.325	-0.418	1.327	0.788	0.46	-0.182	0.58	-0.622	0.06	-0.672	1.225	0.83	1.093	-0.213	0.369	-0.57	-0.478	-0.249	-0.114	-0.27	-0.398	0.03	0.792	-0.425	0.045	-1.06	-0.208	0.693	-0.536	-1.198	0.511	-0.002	-1.674	-0.311	-0.184	0.352	-0.075	1.316	-0.227	-0.511	-0.86	-0.555	-1.199	-0.46	0.361	-0.263	-0.168	-0.097
54903	-0.693	1.886	0.62	0.191	0.461	-0.254	0.879	0.845	1.323	0.236	0.019	1.41	0.147	0.726	0.58	0.611	-0.453	0.293	1.314	0.328	0.159	0.07	0.124	0.156	-0.181	0.643	-0.726	0.889	0.808	0.032	-0.36	0.687	0.176	0.347	0.931	0.661	-0.292	0.915	0.441	0.8	0.543	0.53	-0.254	0.728	-0.405	-0.687	0.28	0.391	0.267
116511	0.145	-0.033	-0.424	1.1	0.11	-0.683	-0.172	-0.607	0.45	0.514	-0.248	0.417	-0.35	0.02	1.047	0.055	-0.332	-0.504	0.104	-0.026	0.309	0.131	-0.105	-0.029	0.08	0.584	-0.029	0.376	-0.398	0.732	-0.121	-0.348	-0.46	-0.333	0.257	0.002	0.029	-0.054	-0.104	0.201	0.247	-0.136	-0.065	-0.04	-0.26	-0.443	-0.254	0.219	0.21
9969	-0.63	0.391	0.376	-0.976	0.099	-0.141	0.75	0.824	0.134	-0.463	0.276	0.331	0.489	0.392	1.254	1.143	0.128	-0.689	0.677	0.371	-0.402	0.654	0.418	0.46	-0.802	0.256	-0.01	0.912	0.284	-0.26	0.404	0.315	-0.201	-0.117	0.206	0.038	-0.065	1.05	1.086	1.807	0.095	-0.496	-0.152	-0.09	-0.33	0.518	-0.793	0.364	-1.15
23348	-0.242	-0.387	0.343	0.872	-0.327	0.163	0.76	1.175	0.039	1.232	0.688	0.019	0.634	1.195	-0.337	0.061	0.375	0.828	0.653	-0.108	0.481	0.428	0.107	0.372	-0.539	0.202	0.337	0.191	0.068	0.034	0.424	1.261	0.3	0.912	-0.38	-0.448	0.312	0.509	0.515	0.716	0.339	-0.935	-0.83	1.003	1.332	0.748	-0.068	-0.048	0.609
2009	-0.246	-0.275	-0.624	0.747	-0.588	-0.32	-2.358	-2.287	-1.448	-2.113	0.295	-0.691	-0.659	0.488	-2.66	-2.043	-1.402	-0.148	0.241	0.298	-0.524	-0.668	-0.029	-1.158	-0.444	-1.439	-1.182	-1.925	-0.05	-0.214	-0.408	0.291	0.43	-1.374	0.475	-0.926	-1.71	-1.025	-1.069	-0.349	-3.025	-1.528	-1.257	-1.178	-0.566	-0.158	-2.187	0.112	-1.142
55879	0.283	0.532	0.297	-0.236	0.408	-0.757	0.079	0.353	1.053	0.386	-0.179	0.425	-0.072	0.435	0.478	1.208	0.686	-0.118	0.518	0.008	-0.312	-0.356	0.053	0.156	2.228	0.561	1.779	-0.033	0.427	0.206	0.292	-0.54	0.735	0.15	0.331	0.182	0.694	0.159	0.573	0.005	0.454	0.192	0.338	1.914	1.23	-0.358	-0.137	0.405	-0.063
23237	-0.057	0.026	-0.149	0.453	0.096	-0.085	0.223	-0.329	-0.617	0.019	-1.002	-0.091	-0.421	0.357	0.146	-0.199	-0.29	-0.185	-0.355	-0.295	-0.285	-0.25	-0.358	-0.6	-0.445	1.039	-1.022	0.259	1.359	0.412	-0.384	-0.34	-0.33	-0.641	-0.507	-0.238	-0.202	-0.351	-0.598	0.127	-0.101	-0.033	-0.566	-0.376	-0.234	0.282	-0.114	-0.383	-0.106
10555	-1.465	-1.349	-1.424	0.055	0.193	-1.333	0.414	-0.681	0.841	0.162	-0.877	-1.281	-0.484	-0.721	-1.312	-0.767	0.277	0.515	-1.285	-1.094	-0.196	-1.66	-1.174	-0.74	0.672	-0.465	-1.323	-0.918	-1.087	-1.106	-0.938	0.324	-0.755	-1.321	-0.464	-0.408	-0.853	-1.386	-1.286	-0.629	0.351	1.191	-0.445	-0.515	-0.985	-1.848	-0.681	-0.162	-0.231
9681	0.212	-0.762	0.21	0.832	-0.273	-0.157	1.221	-0.523	-0.129	-0.157	-0.138	0.547	-0.545	-0.122	-0.25	-0.095	0.341	-0.481	0.917	-0.684	-0.429	0.435	0.252	0.846	-0.321	0.793	-0.735	0.749	-0.473	0.953	0.173	0.927	-0.121	0.01	0.616	0.989	0.405	0.35	-2.937	1.372	1.63	-1.322	-0.797	0.781	-0.538	0.334	0.219	-0.475	0.428
642946	0.806	3.368	0.944	-0.101	2.388	1.246	0.012	1.726	2.883	0.534	-0.191	0.991	1.917	-0.072	1.92	0.692	2.051	1.712	2.184	2.347	0.671	1.188	1.122	0.988	2.265	-0.645	1.398	0.658	0.963	0.93	1.778	0.521	1.326	1.044	1.194	2.269	1.675	1.773	1.463	0.087	1.978	1.837	1.091	0.76	1.014	1.507	0.754	0.843	1.779
54886	1.47	1.227	1.849	0.217	3.309	-0.616	1.702	0.813	1.156	-0.649	-0.469	0.444	2.731	0.351	3.217	1.947	1.23	3.181	2.125	1.287	-0.474	2.464	1.664	0.158	2.395	0.49	0.591	2.491	3.193	3.364	1.556	3.715	1.809	-0.751	0.645	2.097	3.034	0.92	-0.132	1.808	0.131	0.526	1.363	-0.135	0.853	3.886	0.851	0.154	0.752
84955	0.576	1.714	2.589	-1.284	1.542	1.471	-0.411	0.882	0.265	0.186	0.701	0.809	1.074	0.906	1.947	1.507	0.328	1.011	1.678	0.614	0.482	2.159	1.703	0.543	1.106	0.145	0.206	0.955	1.693	1.03	0.444	0.287	1.479	0.196	-0.109	0.494	0.58	1.349	0.939	0.291	-0.34	-0.342	1.114	0.365	0.656	0.066	1.332	0.452	0.92
6791	-0.185	0.16	-0.881	-1.205	0.651	0.518	0.554	1.081	0.012	-0.761	0.173	0.824	-0.208	-1.303	0.358	1.004	2.347	-0.011	-0.552	0.364	1.125	1.517	-0.116	0.786	1.017	0.354	0.409	-0.432	-0.05	-1.132	1.034	0.516	-0.009	1.197	0.324	0.613	-0.265	0.913	2.428	-0.981	0.902	1.737	2.147	-0.49	0.992	0.772	0.585	0.343	1.77
116843	-0.361	-0.046	0.121	0.174	0.318	0.154	-0.893	0.675	-0.228	-0.006	0.243	-0.967	0.673	-0.826	-0.47	-0.18	0.631	1.546	1.043	-0.689	0.972	0.003	-0.689	0.854	0.991	-1.31	0.964	-0.072	-0.884	-1.264	0.479	0.186	0.864	0.994	0.871	-0.291	0.155	0.565	-0.011	0.437	0.373	0.851	1.504	0.774	-0.066	0.892	1.365	-0.01	0.191
148252	-0.334	-0.505	-0.759	0.746	0.452	1.158	-0.139	-0.04	2.831	0.066	0.66	0.187	-0.281	-0.433	-0.048	0.01	0.602	1.119	-0.62	0.145	-0.611	0.581	-0.836	-0.309	0.273	0.035	-0.762	-0.192	-0.338	-0.112	-0.344	-0.772	-0.235	-0.228	1.703	0.014	-0.274	1.914	-0.214	-0.676	-0.076	-0.234	-0.355	-0.962	-0.538	-0.571	0.253	-0.094	0.077
6576	0.305	0.307	1.073	0.498	1.259	0.042	1.624	-0.565	0.915	1.057	-0.481	0.467	0.713	-0.321	-0.697	0.013	0.103	0.212	0.457	-0.06	-0.468	0.92	-0.091	-0.224	0.92	1.495	0.02	0.463	0.79	1.125	0.011	-0.386	0.328	-0.399	0.118	0.958	0.728	-0.497	-2.056	0.277	-0.202	-0.358	-0.327	0.514	-0.768	-0.255	-0.324	0.349	0.109
10948	0.061	0.788	-0.176	0.171	-0.002	-0.053	0.432	0.125	0.658	0.533	0.053	0.063	0.078	0.536	0.362	0.32	0.524	0.551	0.035	0.312	-0.142	-0.342	0.391	0.403	-0.024	0.612	0.44	0.712	0.515	0.161	0.24	0.731	0.185	0.294	0.313	0.256	0.314	0.382	-0.248	0.154	-0.333	1.243	0.663	0.408	-0.047	-0.005	0.951	0.414	1.106
256949	-0.618	-0.445	-0.444	0.145	-1.015	-0.45	-0.457	-1.907	-0.469	0.146	-0.808	0.511	0.002	1.269	-1.072	0.479	-1.332	0.009	-0.986	0.389	-0.334	-0.296	-0.469	1.13	-0.826	0.71	-0.357	-0.737	0.17	0.511	-0.678	-0.1	0.399	-0.123	-0.758	-0.758	-0.364	-0.854	-0.321	0.055	-0.99	-0.787	-0.299	-0.055	0.456	-0.539	-0.624	0.425	-0.139
79962	-0.621	-0.507	0.085	-0.894	1.653	-1.196	0.714	0.021	-0.451	2.021	-0.285	-0.484	-0.375	0.16	0.136	0.026	-0.051	-1.013	-0.919	-0.94	0.461	-0.635	-0.822	0.133	1.386	-0.048	0.346	-0.633	-0.224	0.249	0.344	-0.503	0.992	-2.64	-0.258	0.479	-0.401	0.044	0.039	-1.143	0.328	0.646	1.408	-0.315	-1.217	-0.413	-1.416	0.491	-0.158
286186	-0.261	0.164	-0.023	0.185	-0.034	-0.149	-0.197	0.064	-0.086	0.011	0.035	0.385	-0.369	-0.379	-0.218	-0.056	0.24	0.189	-0.209	-0.393	-0.434	-0.017	0.221	0.065	0.354	-0.64	0.006	-0.362	0.141	0.073	0.234	-0.529	-0.392	-0.222	-0.034	-0.01	0.192	0.144	-0.339	0.563	-0.022	0.604	-0.032	0.194	-0.373	0.306	-0.256	0.152	0.013
284486	0.138	1.065	0.801	0.404	1.413	1.114	2.291	1.585	1.083	1.075	0.14	1.507	-0.42	1.757	0.239	-0.152	1.748	-0.629	0.509	0.743	0.737	1.236	1.337	1.642	0.947	1.444	-0.27	2.49	1.071	1.267	2.186	-0.85	1.119	0.947	3.482	1.026	1.385	2.206	1.123	1.99	1.401	1.006	1.2	1.016	0.622	0.372	-0.596	3.063	-0.869
8871	0.321	0.036	0.798	-0.511	-0.193	0.487	0.904	0.821	1.49	0.692	1.073	-0.514	1.869	1.053	0.462	1.329	0.108	1.907	1.195	1.601	0.871	0.009	0.555	0.439	-0.099	0.836	1.333	-0.614	0.489	-0.398	0.325	0.444	0.479	0.031	0.625	1.093	-0.219	1.602	1.311	1.648	0.211	-1.005	0.773	0.86	1.28	1.464	-0.122	0.88	1.452
163259	0.98	-0.331	0.872	0.452	-1.578	-0.107	0.844	0.39	-0.994	-0.117	0.069	-0.249	0.592	-0.624	-1.265	1.344	0.77	0.496	1.751	0.649	0.496	0.092	-0.238	1.087	-1.154	-0.482	-0.06	0.411	-0.303	-0.184	0.84	2.14	-0.389	0.891	0.946	0.591	-0.671	0.585	1.076	1.355	1.238	0.26	-1.021	1.147	-0.733	0.817	0.305	1.363	-0.05
8626	0.194	1.767	1.599	0.454	-1.084	2.15	4.017	1.126	-0.631	-1.131	1.542	1.345	-0.33	0.238	-0.807	-1.654	0.224	-0.334	-1.024	-2.377	2.667	-1.084	-0.001	-0.06	0.239	1.091	0.679	3.554	1.712	-0.003	-1.561	1.161	0.374	3.076	-1.555	-0.928	-0.4	-1.362	2.718	-0.265	1.661	-2.344	-0.095	0.159	-0.973	1.264	0.566	-1.504	-0.98
9849	-0.166	1.684	0.405	0.163	1.138	0.009	0.944	0.582	-0.547	0.099	-0.28	1.049	1.835	0.568	-1.298	1.448	0.679	0.952	0.606	1.774	1.644	-0.697	-0.386	0.289	0.645	-0.089	1.178	0.126	0.657	-0.404	-0.058	2.515	0.336	0.983	1.31	1.565	0.577	0.301	1.712	1.159	1.065	1.466	0.744	0.858	0.734	0.6	0.44	1.406	1.614
1773	-0.067	0.461	0.325	-0.039	0.119	0.35	0.618	0.07	2.172	0.185	0.244	0.52	0.405	-0.019	-0.248	0.006	-0.086	0.589	0.143	-0.388	0.538	-0.746	-0.071	0.941	0.839	0.777	-0.048	0.322	0.222	0.531	-0.156	0.428	0.175	1.153	0.005	0.366	-0.334	0.432	-0.119	0.31	0.646	0.827	0.499	0.949	0.33	0.437	0.418	-0.143	0.674
54465	0.47	1.147	0.669	0.897	0.929	-0.188	-0.074	0.79	0.321	0.196	-0.34	1.553	1.239	0.564	0.278	1.204	0.328	0.773	0.183	0.182	0.474	-0.071	0.366	0.812	-0.625	0.101	1.269	-0.378	-0.115	-0.712	-0.12	1.923	0.94	0.837	1.768	0.841	0.848	0.816	0.982	-0.014	-0.556	1.2	0.399	0.995	1.099	0.58	0.352	0.831	0.586
23314	-1.099	-0.486	0.296	-0.434	0.553	-1.912	0.539	1.652	1.998	2.053	-0.218	0.986	-2.726	2.081	1.278	-2.261	0.917	0.465	0.344	0.501	0.468	0.981	0.586	1.767	1.572	1.027	-0.565	0.529	-0.138	0.807	1.091	-0.244	1.184	0.895	1.332	-0.759	1.348	1.782	1.288	0.319	2.042	1.545	0.405	1.672	0.497	0.632	0.683	1.624	-0.474
9113	-0.08	-0.131	0.191	0.736	0.3	-0.329	0.346	-0.27	-0.144	0.347	-0.212	0.259	-0.04	-0.375	-0.49	-0.019	0.104	0.187	0.2	0.336	0.143	-0.093	-0.267	-0.015	-0.078	0.353	-0.109	0.242	-0.179	-0.005	-0.281	-0.076	-0.088	-0.307	0.153	-0.552	0.087	0.032	-0.133	0.175	0.069	0.149	-0.272	0.361	-0.242	0.281	-0.32	0.002	0.083
122402	-1.275	-0.449	-0.552	-0.813	-1.589	-0.155	-1.502	1.969	-1.483	-0.715	-0.009	-1.028	1.013	0.24	-0.325	-0.69	-0.138	0.678	-0.933	-0.454	-0.006	-0.686	-0.893	-1.093	-0.151	0.225	-0.125	-1.528	-0.104	-1.112	-0.809	-0.58	-0.553	-0.126	-1.498	-1.393	-1.079	-1.629	-0.521	0.066	-1.739	-1.413	-0.704	0.09	0.435	-0.199	-1.086	-0.724	-0.311
83590	0.553	0.546	-0.16	0.406	0.101	-0.316	0.746	-0.208	0.709	0.987	-0.675	0.007	-0.137	0.082	0.454	0.304	1.03	0.555	0.091	-0.715	-0.319	-0.199	0.208	0.221	0.372	0.868	0.205	0.534	0.432	0.395	-0.251	0.493	0.616	0.275	-0.468	0.559	0.695	-0.186	-0.52	-0.035	0.27	1.604	-0.257	0.794	-0.334	-0.067	0.228	0.236	0.29
9957	-0.358	-0.172	-0.984	-0.59	-1.329	0.186	-0.123	-0.073	-0.692	0.638	1.169	-0.001	0.049	0.207	-0.317	-0.403	0.244	0.039	-0.298	0.284	0.249	0.216	0.094	-1.073	-0.918	-0.411	1.164	-1.31	-1.019	-0.342	-0.171	-0.976	-0.034	0.148	-2.736	-0.51	-0.971	-0.642	-1.13	-1.715	-1.48	-0.503	-0.374	0.083	-0.319	-0.284	-0.528	-0.486	0.141
84553	-0.504	3.085	-0.866	-0.801	1.323	-0.094	-2.299	-0.148	0.736	0.455	3.773	-0.623	-0.475	1.252	0.165	-1.754	2.876	1.142	-0.647	-0.654	0.052	2.067	1.483	0.328	-0.644	-0.701	0.608	-3.287	-0.432	-1.739	0.326	-0.484	0.685	-0.582	-2.689	0.155	-2.056	1.8	0.215	-1.22	-0.653	-0.106	3.08	-0.592	0.489	-0.242	-0.188	0.033	0.489
113026	-0.894	1.244	0.096	0.342	-1.43	1.507	0.76	-0.091	1.32	0.272	0.125	0.158	0.198	0.763	0.336	1.24	0.815	0.479	1.762	0.952	0.037	-0.347	0.735	-0.728	-0.3	0.548	0.699	0.078	-0.156	-0.179	0.527	0.269	0.018	0.176	-0.155	-0.472	-0.683	0.971	0.185	-0.47	-0.052	0.886	0.48	0.065	0.418	0.955	1.683	0.313	1.166
729608	-0.501	0.027	0.572	0.074	1.202	0.242	-0.335	-0.461	-1.024	-0.474	-0.185	0.022	0.959	-0.361	0.443	0.753	0.286	0.804	0.588	0.591	0.056	0.06	0.202	0.322	0.188	-0.636	0.532	0.05	-0.317	0.453	1.278	-1.498	-0.563	-0.929	-0.563	-0.312	0.744	0.678	-0.161	0.465	-0.463	-0.794	0.273	-0.266	0.282	0.253	-0.282	-0.331	-0.161
5193	0.084	-0.075	0.349	-0.032	0.515	-0.894	0.14	-0.252	0.15	0.65	-0.767	1.614	-1.123	0.518	-0.073	0.269	-1.81	-1.386	0.931	-1.194	-0.052	0.247	0.337	0.389	-0.802	0.276	-1.364	0.819	-0.175	0.975	-0.245	-0.747	-0.25	-1.156	0.183	-0.107	0.792	0.378	0.292	1.371	-1.546	-3.857	-2.499	0.126	-0.355	-0.789	0.234	-0.266	-1.173
3699	-0.24	-0.133	-0.868	-0.128	-1.272	-0.246	0.194	-0.106	0.211	0.249	-0.149	-0.006	0.089	0.418	0.224	-3.93	-0.366	-0.471	-3.513	0.324	-0.508	-0.797	-0.83	-0.01	0.013	0.502	-2.565	-0.299	0.137	-0.533	0.208	0.426	-0.354	-0.633	-0.645	-0.132	-0.121	-0.565	0.347	-0.167	0.112	-1.543	-0.478	0.249	0.05	-0.457	-0.585	0.138	0.187
2620	0.482	-0.843	0.581	0.611	2.61	-1.547	1.14	-0.193	1.457	-0.49	-1.291	0.245	0.453	-2.074	0.068	-0.509	-0.74	-0.152	0.621	-0.186	-1.135	-0.752	-1.23	0.304	0.25	0.535	0.146	0.671	-1.198	-0.16	-0.773	1.496	-0.147	-0.636	-1.761	0.464	0.926	-1.976	-0.667	0.859	-0.022	-2.593	-0.218	-0.695	-2.008	0.341	0.014	-0.664	-0.852
401282	0.053	0.121	-0.68	0.108	0.374	-0.682	-0.571	-0.252	-0.266	0.295	0.011	0.345	-0.252	0.456	0.081	0.091	0.008	-0.538	-0.293	-0.202	0.085	0.298	0.039	0.258	-0.137	0.437	-0.247	0.213	0.523	0.428	0.117	-0.531	0.033	-0.657	0.66	-0.683	-0.396	0.035	-0.043	-0.299	-0.405	0.9	-0.231	0.079	0.331	-0.635	-0.532	-0.269	-0.162
23576	0.125	-0.682	-0.547	0.023	-0.557	-0.358	0.456	0.479	0.06	0.008	-0.288	0.008	-0.357	-0.57	-0.213	0.54	0.461	-0.394	-0.19	-0.438	0.005	-1.363	-0.33	-0.122	-0.037	-0.245	-0.222	-0.4	-1.988	-0.541	0.762	-0.183	-0.713	-0.428	0.02	-1.069	-0.465	-0.099	0.055	0.458	0.724	0.344	-0.598	0.187	-0.208	0.131	-0.537	0.193	-0.223
5244	0.096	-1.591	-0.145	-0.22	-1.458	-0.999	0.073	0.128	-2.367	0.346	-1.623	0.692	-4.269	-0.681	-2.017	-1.968	-0.784	-2.974	-2.539	-1.738	-0.638	0.544	-0.499	0.466	-2.386	0.69	-2.475	-1.009	0.071	0.819	-1.054	-1.08	-2.311	-1.99	-1.384	-1.902	-0.072	-0.649	-0.156	1.615	-0.062	-2.31	-2.477	-0.32	-1.348	-1.3	-4.186	-0.62	-5.636
155054	0.222	0.511	-0.441	1.566	-0.631	-0.678	1.864	0.473	1.591	2.432	-0.366	2.315	-0.362	1.56	-2.284	1.78	-0.135	0.103	1.733	0.688	-0.382	-0.042	0.649	1.634	-1.015	1.775	-1.372	-0.857	1.093	1.281	-1.011	0.2	0.114	-0.003	0.977	1.283	-0.258	0.135	0.034	2.228	0.332	-2.056	-0.745	1.816	-0.829	1.335	1.423	2.118	1.205
1639	-0.156	1.442	0.57	0.238	0.39	0.506	0.628	0.381	0.623	0.306	0.084	0.318	0.376	0.482	-0.137	0.424	0.653	0.549	1.064	0.564	0.245	-0.196	1.038	-0.167	1.191	0.831	0.552	0.066	1.293	0.607	0.169	0.509	0.983	0.62	1.296	0.611	0.882	0.713	-0.584	-1.044	0.407	0.551	1.229	1.47	0.548	-0.11	0.379	0.62	0.373
6416	-0.952	-0.85	-1.048	0.023	-0.057	-0.689	-1.063	0.047	-0.467	-1.082	-0.714	-0.823	-0.524	0.233	-0.823	-0.904	-0.761	-0.442	-1.13	-0.173	-0.743	-1.132	-0.64	-1.479	-0.411	-1.185	-0.823	-1.209	-0.504	-0.055	-0.654	-0.036	-0.665	-0.781	-0.319	0.006	0.279	-1.492	0.105	-1.137	-0.389	-1.014	-0.152	-0.756	-0.072	-0.961	-0.582	-0.655	-0.155
8856	1.061	-1.763	-0.595	0.31	-3.515	-2.052	-0.36	-0.184	-1.49	-1.047	-1.846	0.068	-2.137	-0.325	-1.703	-0.163	-1.574	-4.221	-1.224	-3.648	-0.711	-5.034	-0.069	-6.691	-5.418	-0.095	-4.591	-0.896	-2.218	0.278	-1.59	-0.375	-3.235	-0.857	-4.84	-4.766	-0.602	-0.185	-1.69	-0.676	-0.006	-6.456	-5.645	-0.032	-4.257	-0.476	0.15	-1.879	-2.464
51277	-0.106	0.471	-0.53	-0.869	-1.224	-0.324	-1.052	-0.277	-0.283	0	-0.082	0.393	-0.506	0.984	-0.187	0.688	-0.951	-0.364	-0.383	0.428	-0.307	-0.592	0.015	0.162	-1.159	0.045	-0.796	-0.604	0.657	0.067	0.029	-0.318	-0.561	0.219	0.265	-0.13	-1.387	0.611	0.101	-0.439	-0.349	-0.986	0.119	-0.283	0.613	0.047	-0.299	-0.104	-0.534
286191	2.018	1.018	0.234	0.31	-0.809	0.166	3.184	0.874	-0.128	-0.65	0.126	0.421	0.246	-0.795	0.075	-0.575	0.088	0.399	0.097	-0.469	-0.277	-0.263	0.063	-0.106	-0.671	-1.168	0.508	0.539	0.106	-0.035	0.178	0.518	-0.365	-0.295	-0.288	-0.485	-0.467	0.035	0.174	0.315	0.62	-0.174	1.199	-0.486	-0.319	-0.642	0.351	0.119	0.399
401459	0.051	0.276	-0.016	0.267	0.004	-0.685	0.272	-0.489	0.29	-0.587	-0.453	0.167	-0.359	0.06	0.127	0.123	0.11	0.108	-0.436	-0.103	-0.541	-0.45	0.088	0.074	-0.315	0.31	-0.193	0.118	-0.5	-0.027	0.361	-0.143	-0.481	-0.999	-0.116	0.201	0.103	0.065	-0.499	0.232	0.132	0.189	-0.033	-0.373	-0.529	-0.527	-0.456	0.174	0.174
285593	-0.184	-0.058	0.035	-0.081	0.255	-0.384	0.164	-0.861	-0.216	0.379	-0.573	-0.074	-0.168	-0.147	-0.056	0.171	0.134	-0.21	-0.296	0.226	0.115	-0.168	-0.11	0.235	0.052	0.135	-0.351	0.223	0.586	0.484	-0.198	-0.578	0.284	-0.269	-0.374	0.05	-0.102	-0.016	-0.544	0.542	-0.088	0.762	-0.229	-0.122	0.11	0.269	-0.391	-0.063	-0.144
5863	0.376	0.43	0.563	-0.181	0.174	0.343	0.268	-1.06	0.458	0.173	-0.179	0.278	1.97	0.55	-0.07	-0.711	-0.581	1.458	0.349	0.515	0.021	0.867	0.563	0.176	-0.139	1.282	0.943	-1.004	1.15	-0.148	-1.117	0.501	0.285	0.638	0.115	0.717	-0.485	0.373	-0.6	0.592	-0.439	1.264	0.78	0.979	-0.109	-0.392	0.635	0.095	1.53
10514	-0.681	0.308	-0.507	-0.013	0.152	-0.005	0.068	-0.316	-1.036	-0.11	-0.013	-0.273	-0.317	1.066	-0.182	0.107	-0.156	0.434	0.12	0.423	-0.238	0.183	0.312	-0.484	0.278	-0.001	0.453	-0.27	0.675	0.325	-0.407	-0.523	0.115	0.181	-0.527	-0.243	0.676	-0.764	0.253	-0.786	-0.438	-0.588	0.885	-0.032	0.493	-1.204	0.379	-0.319	0.376
123264	3.766	-1.111	0.153	2.201	2.972	0.831	0.413	1.756	0.901	1.188	0.202	0.208	0.747	-0.983	2.053	4.723	2.573	1.737	0.984	2.719	1.601	1.629	-1.329	2.057	2.902	0.67	1.242	-1.136	-0.255	0.53	3.083	-0.507	0.3	0.631	1.024	1.125	-0.183	2.076	2.045	2.388	1.301	0.173	0.563	2.977	0.338	2.886	3.274	3.233	1.22
730754	-1.113	-0.731	-0.363	0.227	-0.334	-0.557	-0.216	-1.074	-0.342	-0.616	-0.659	-0.421	-0.675	-0.391	-0.043	-0.28	-0.504	0.152	-0.686	-0.747	-0.582	-1.24	-0.726	0.393	-0.647	-0.394	-0.852	0.745	-1.151	-0.34	-0.35	-0.256	-0.819	-0.804	-0.679	-0.378	-0.264	-0.248	-0.278	0.78	0.358	0.938	-0.874	0.034	-0.392	-0.085	-0.93	-0.761	-0.4
153770	0.811	0.722	2.37	-1.438	0.192	-0.514	0.422	-1.054	-0.018	-0.358	-0.426	0.749	0.322	0.726	-0.005	0.678	0.44	0.747	0.087	1.985	3.076	0.544	0.506	0.663	1.12	1.392	1.633	1.479	-0.473	0.683	-0.234	1.703	2.728	-0.162	1.123	0.463	-0.048	0.589	0.609	0.288	0.822	-0.202	1.636	0.617	0.216	0.37	0.562	-0.037	-0.634
3250	0.456	-0.613	-0.268	-0.767	-1.135	-0.653	0.839	0.604	0.643	0.601	-0.853	0.494	-1.058	-0.762	0.81	0.382	-1.473	-4.314	-2.91	-1.101	-0.844	-0.731	0.931	-0.011	-1.927	-0.13	-3.276	1.446	0.922	1.018	-0.181	0.862	-1.883	-0.97	-1.843	0.058	0.897	-0.787	-0.73	-0.779	0.277	-1.364	-4.928	-0.77	-1.936	-1.078	-0.152	-0.085	-2.29
80163	-0.09	0.297	0.94	-0.19	-0.485	-0.622	-0.059	0.36	0.671	-0.089	-0.816	0.483	0.146	0.335	-0.763	-0.446	-0.466	-0.491	0.219	-0.239	-0.472	0.148	0.57	0.447	-0.781	-0.023	-0.764	0.745	1.208	0.329	-0.17	0.049	-0.682	-0.802	-0.285	0.788	-0.343	-0.704	0.305	-0.005	1.555	-0.369	-1.217	-0.741	-0.992	-0.585	0.145	-0.073	-0.764
9477	0.809	0.199	2.862	-0.869	1.753	0.65	1.295	1.059	0.793	-0.068	0.586	0.776	1.175	1.35	0.994	2.029	0.581	0.399	0.514	0.907	0.722	1.884	1.075	0.757	1.019	0.257	0.656	0.735	2.039	0.549	0.988	0.092	1.194	0.156	0.644	1.208	0.609	0.709	0.452	1.069	0.78	1.659	-0.013	0.256	0.338	0.151	0.262	1.517	0.208
7754	3.287	-1.314	0.079	0.408	-0.846	-0.064	2.333	2.581	-1.427	-0.579	2.73	-0.818	2.703	-0.264	-3.833	-1.195	1.885	1.672	2.551	-3.026	-0.577	1.247	2.079	-0.728	0.104	0.15	1.753	-1.364	-2.06	-2.172	-1.064	-0.046	-1.315	2.727	-1.514	1.155	0.262	1.604	2.477	-0.901	3.904	2.394	-1.58	-0.202	-0.683	0.465	0.784	2.499	1.209
339122	-0.079	-0.272	-0.248	0.068	-0.27	-0.31	0.631	-0.456	-0.657	-0.316	-0.759	-0.425	-0.651	-0.092	-0.065	-0.312	-0.321	-1.355	-0.856	-0.217	-0.622	-0.181	0.035	-1.325	-0.085	0.557	-0.505	-0.143	-0.585	0.044	0.161	-0.289	0	-0.534	-0.742	-0.723	0.326	-0.776	-1.401	-1.004	0.36	-0.609	-0.53	-0.447	-0.738	-0.743	0.043	0.078	-0.507
64116	0.033	0.222	-0.093	0.349	-0.085	0.031	0.188	-0.294	0.129	0.046	-0.36	-0.111	0.353	0.05	0.229	0.197	-0.059	-0.321	0.173	0.01	-0.465	0.095	-0.215	0.252	-0.077	0.447	-0.023	0.463	-0.073	0.311	-0.029	-0.126	-0.109	0.065	-0.09	0.057	-0.109	0.285	0.193	-0.092	0.331	0.064	-0.148	-0.584	0.006	-0.14	-0.6	0.025	-0.359
260429	-0.106	-0.028	-0.405	0.453	0.052	-0.556	-0.336	-0.777	-0.064	0.417	-0.793	-0.582	-0.751	0.155	-0.295	0.166	-0.958	-0.258	-0.121	0.069	-0.249	-0.082	-0.499	-0.079	-0.595	0.298	-0.275	0.227	0.12	-0.064	0.107	-0.487	-0.473	-0.39	-0.19	-1.098	-0.282	0.239	-0.347	0.257	-0.57	-0.033	0.142	-0.39	-0.453	-0.108	0.129	-0.421	-0.241
256112	0.775	0.617	0.343	0.222	0.003	1.474	0.336	1.129	0.433	-0.555	0.631	1.425	0.647	0.338	0.678	0.263	0.124	1.722	0.797	-1.261	0.702	0.641	0.847	0.315	-0.729	1.55	2.12	-0.83	0.033	-0.38	0.053	1.551	0.78	1.835	0.989	-0.36	-0.504	-0.108	1.211	1.222	0.03	0.463	1.529	-0.108	0.462	0.927	0.302	0.45	1.475
389856	-0.413	2.009	1.148	-0.757	1.326	0.595	-0.381	1.586	2.606	-0.236	0.278	-0.388	2.737	0.224	1.154	-0.525	0.458	1.247	-0.201	2.423	0.299	0.368	0.874	-1.276	-1.106	0.529	1.999	0.077	2.505	0.086	0.791	2.639	0.885	0.018	-0.421	1.51	1.032	0.04	-0.793	-0.444	0.764	-1.894	-0.182	0.666	1.568	0.389	3.173	0.623	1.437
2005	-0.005	0.107	0.728	-0.089	0.191	0.454	0.176	0.331	-0.774	-0.039	-0.117	0.426	-0.343	0.145	1.616	-0.13	0.543	-1.174	0.691	0.163	-0.119	1.104	0.631	-0.627	0.205	-0.473	0.366	-0.327	0.115	0.656	0.34	-0.374	-0.03	0.084	1.076	-0.402	1.269	0.819	-0.699	0.778	0.78	-0.256	-0.839	0.437	0.531	0.355	-0.689	0.763	0.726
400673	0.213	-0.191	0.997	0.934	-0.471	1.007	0.437	0.448	-0.116	0.824	0.064	0.482	0.254	0.253	0.728	-0.16	0.055	-0.716	0.464	-0.362	-0.538	1.2	-0.011	-0.154	0.308	0.971	-0.553	0.192	0.757	1.355	-0.394	1.171	0.238	0.54	0.318	1.057	0.648	0.217	0.048	0.783	1.266	0.437	0.36	0.949	0.269	0.017	0.998	0.701	0.841
8330	0.255	0.021	0.267	0.524	0.241	0.126	-0.186	-0.167	0.831	0.73	0.231	0.13	0.43	0.125	0.753	-0.244	-0.235	-0.281	0.136	0	-0.291	0.264	-0.285	0.075	-0.112	0.435	0.2	-0.42	0.256	0.325	-0.166	-0.566	-0.481	-0.453	-0.01	0.333	-0.262	-0.37	0.409	0.135	0.431	1.194	0.002	-0.259	-0.416	-0.795	-0.608	-0.084	0.231
3249	-0.047	-0.291	-0.857	0.324	0.438	-0.206	0.135	-0.778	0.018	0.192	-0.761	-0.154	0.062	0.663	-1.064	-0.733	-0.487	-0.617	-1.47	-0.261	-0.596	-0.49	-0.473	0.107	0.634	0.416	-0.686	-0.322	-0.443	0.165	-0.522	0.193	-0.651	-2.106	0.172	0.049	-0.959	-0.497	-0.172	-0.523	-0.164	-0.741	-2.299	0.032	-0.48	-0.746	-0.672	-0.173	-0.685
127602	0.234	0.053	0.945	-0.318	0.246	0.538	-0.021	-0.375	0.466	0.263	-0.547	0.324	0.932	0.435	0.643	-0.36	0.038	2.044	0.476	1.154	-0.11	-0.411	-0.225	-0.075	0.925	-0.073	0.257	0.633	-0.002	0.347	0.219	0.398	1.052	-0.303	1.012	0.923	-0.189	0.384	-0.365	-0.262	-0.243	0.997	-0.467	-0.19	0.145	0.015	-0.252	0.559	0.158
441124	0.204	0.031	-0.403	0.287	0.302	-0.318	0.122	-0.536	0.481	-0.139	-0.284	0.18	-1.158	-0.198	-0.06	-0.34	-0.085	0.187	0.02	0.197	-0.591	-0.338	-0.204	0.607	0.071	-0.044	-0.092	-0.066	-0.238	0.057	-0.143	-0.3	-0.216	-0.179	-0.318	0.43	0.019	-0.297	0.269	0.165	-0.103	0.229	-0.374	-0.566	0.249	0.215	0.215	0.023	-0.01
404281	-0.084	-0.36	-0.075	0.259	0.363	-0.099	0.471	-0.296	0.271	0.037	-0.957	0.177	-0.755	0.493	-0.187	-0.127	-0.922	-0.361	0.151	-0.067	-0.173	0.11	0.145	0.133	-0.196	0.046	0.219	1.223	0.828	0.204	0.188	0.167	-0.241	0.028	0.351	0.215	0.81	-0.211	0.349	0.786	0.637	-0.101	0.092	-0.141	0.327	-0.144	0.094	-0.253	-0.789
22874	0.088	2.266	-0.207	-0.311	0.575	0.273	2.697	0.057	1.243	2.501	-0.023	0.474	1.669	0.129	-0.369	0.005	1.91	0.638	0.555	-0.569	-0.598	-0.094	-0.488	0.245	0.36	0.539	-0.915	-1.274	0.796	1.185	1.436	0.756	-0.539	-0.181	1.114	0.608	-1.347	1.04	-0.189	1.282	0.416	2.219	1.182	2.305	-1.23	-0.799	-0.6	2.388	2.291
7738	1.12	0.324	1.64	0.98	0.671	0.102	0.482	-0.098	-0.246	-0.526	0.218	1.186	0.514	0.562	0.346	0.287	0.379	-0.204	0.244	0.146	1.213	1.316	1.258	0.32	0.245	1.123	0.283	-0.018	0.151	-0.288	0.217	0.034	0.18	0.397	-0.044	-0.3	0.62	-0.016	1.926	1.458	0.506	-0.122	0.048	0.248	0.477	0.173	0.465	0.2	0.899
64284	0.081	-0.602	-1.204	-0.022	-0.322	-1.46	-0.202	-0.521	0.246	-0.32	-0.84	-0.33	-0.708	-2.986	-3.195	-1.593	0.35	-1.493	-1.647	-1.493	-0.924	-1.223	-1.796	0.566	-1.485	-0.147	-2.383	-0.126	-2.339	-0.091	0.164	0.075	-2.121	-2.564	-0.516	-0.756	-1.259	-0.501	-1.383	-0.683	-0.953	-2.475	-3.897	-0.577	-2.449	-0.597	-0.715	-0.828	-0.79
3104	-0.228	0.05	-0.161	-0.157	-0.988	-0.813	0.884	-0.726	0.162	-0.117	-0.697	0.647	-0.519	-0.122	-0.919	-0.735	-0.575	-0.643	0.713	-1.133	-0.676	-0.53	-0.607	0.004	-0.554	0.485	-0.74	0.007	-0.512	0.492	-0.368	0.519	-0.252	0.049	-0.366	0.108	-0.776	-1.427	-0.344	0.637	0.12	-0.224	-1.232	0.613	-0.626	-0.141	-0.303	-0.664	-0.55
126868	-1.185	0.165	-1.224	-1.19	0.223	0.563	0.241	1.728	-2.092	1.038	-0.298	2.084	-2.011	0.328	-0.269	-1.728	0.433	-3.65	-2.1	0.283	0.589	-0.703	-0.265	-3.387	-1.31	1.43	0.98	0.047	0.356	0.771	1.307	-1.966	-0.502	-0.435	-1.32	-3.39	1.401	0.834	-3.071	-2.904	1.319	2.337	-0.739	-0.667	0.608	0.94	-0.274	0.852	-2.934
90835	-0.116	-0.145	-0.351	1.177	-0.93	0.345	0.177	-0.656	0.74	-0.714	0.646	-0.937	-0.671	-0.159	-0.537	1.091	-0.14	0.504	1.058	-0.63	0.189	-0.137	0.222	-0.446	-1.063	0.457	0.197	-0.51	-0.592	-0.287	-1.177	0.859	0.015	0.683	0.388	-0.61	-0.923	0.185	1.445	-0.541	0.156	0.739	0.064	0.325	0.664	0.368	0.086	-0.721	0.326
27443	-1.175	0.181	0.342	1.666	1.229	-0.864	1.852	0.833	1.043	0.146	0.202	0.861	0.208	1.162	0.294	1.301	0.801	0.424	-1.23	-2.228	0.067	0.759	-0.268	0.288	1.273	1.797	0.542	0.889	0.552	0.82	0.705	0.828	0.815	-0.617	2.343	-0.33	1.247	0.968	-0.302	0.344	0.932	1.046	0.439	1.904	0.172	0.553	1.209	0.96	0.354
23210	0.508	0.822	-0.114	-1.209	0.249	0.655	-0.151	0.735	0.588	-0.076	0.117	0.305	-0.296	0.028	1.501	0.242	1.428	-0.913	0.693	0.487	-0.238	-0.168	0.242	-0.747	-0.321	-0.308	0.014	-0.004	0.806	0.002	0.63	0.038	-0.215	-0.351	0.421	0.215	0.154	0.838	1.002	-0.272	0.379	0.319	0.95	0.173	1.48	-0.061	0.102	0.356	0.214
647869	0.738	2.421	-0.237	-0.188	-2.621	1.402	0.752	0.833	1.337	-1.032	-0.181	-0.504	4.013	1.182	0.681	-2.291	-0.235	4.85	0.139	0.886	1.256	1.064	1.267	-1.089	0.914	0.934	3.655	-0.756	-0.253	-2.868	-0.188	0.851	1.778	1.881	0.585	2.611	0.209	0.703	0.058	-1.871	-0.596	-0.588	1.842	1.404	0.335	1.595	2.747	0.481	2.724
7162	-0.865	-2.091	-2.643	-1.488	-1.123	0.883	-2.796	0.166	-3.616	-3.886	0.332	-2.455	-1.696	-1.809	-3.165	-3.667	-0.93	-0.274	-1.367	-3.009	-0.919	-1.769	-0.846	-2.318	-2.158	-2.306	-0.944	-3.741	-1.692	-2.869	-1.767	-0.843	-1.16	-0.64	-3.402	-0.985	-0.96	-3.147	1.125	-2.956	1.502	1.376	-0.32	-1.145	-0.231	-1.093	-0.104	-2.851	-1.227
285178	-0.148	2.035	0.585	0.622	-0.69	0.433	-0.293	-0.079	-0.148	-0.295	0.222	0.454	0.45	1.433	0.836	0.378	-0.31	1.226	0.491	3.385	0.946	0.626	0.141	1.764	-0.241	0.601	0.137	0.153	0.061	0.593	0.111	0.636	2.438	0.28	0.816	2.373	-0.053	0.368	1.167	0.623	-0.192	0.804	1.489	1.076	-0.386	0.603	0.35	0.591	-0.016
84224	0.084	0.666	-0.586	0.287	-0.51	-0.128	-0.413	-0.277	0.566	0.43	-0.185	-0.122	-0.629	0.606	-0.29	-0.649	0.873	0.013	0.236	-0.685	-0.376	0.473	0.169	0.061	-0.844	-0.056	0.572	-0.067	-0.193	-0.15	-0.237	-0.324	0.508	-0.011	0.024	0.384	-0.907	-0.279	0.376	0.502	0.131	-0.192	0.466	-0.246	0.431	-0.307	0.072	0.484	0.353
57703	-0.098	0.135	-0.054	0.346	0.189	-0.259	-0.428	0.013	-0.909	-0.473	-0.365	-0.057	0.675	0.224	0.083	-0.32	-0.234	0.128	-0.72	0.345	-0.275	0.32	-0.018	-0.079	-0.072	-0.428	0.54	-0.783	-0.371	-0.282	-0.334	-0.238	0.144	0.056	-0.693	-0.194	-0.018	-0.197	0.062	-0.54	-0.861	-0.97	-0.039	0.04	-0.055	-0.173	1.083	0.231	-0.05
79760	-0.814	1.024	0.106	-0.396	1.054	0.63	0.694	0.143	0.485	0.247	0.049	-0.002	0.39	0.52	0.807	-0.068	1.205	0.356	-0.108	1.474	0.394	0.58	-0.365	0.197	2.777	0.691	1.282	0.515	0.252	0.333	0.374	-0.313	1.038	0.462	0.002	0.378	0.705	0.073	0.265	-0.204	0.327	1.708	1.215	0.151	0.515	-0.353	0.164	0.731	0.735
55776	0.525	0.715	1.686	0.518	1.859	0.31	0.321	0.284	0.93	0.366	0.875	0.2	1.218	0.39	0.448	-0.793	0.598	1.033	0.103	1.594	-0.027	0.439	0.522	0.426	1.249	0.486	-0.065	0.353	0.592	0.76	0.396	-0.451	1.169	-0.222	0.947	1.298	0.165	0.388	-0.768	1.498	0.522	1.112	-0.018	0.012	0.145	0.178	0.088	1.503	1.029
64752	-0.802	1.66	0.173	1.029	-0.504	-0.137	-0.104	0.718	-0.547	0.217	0.363	0.312	-0.459	-0.505	-1.148	0.406	0.821	1.482	0.928	0.064	0.112	-0.522	-0.637	-0.007	0.347	-0.875	1.69	-0.113	0.008	-0.146	-0.233	1.74	0.941	0.622	-0.097	-0.361	-1.125	-0.774	1.225	-0.942	-1.321	0.542	0.83	0.493	0.735	-0.006	0.017	0.948	-0.882
57617	-0.001	0.635	-0.007	-0.333	-0.786	0.227	-0.053	0.203	-0.038	0.071	-0.387	0.24	-0.969	0.976	0.318	0.689	1.424	-0.618	0.477	0.364	0.372	0.262	0.129	-0.625	0.296	1.476	0.779	0.494	0.179	0.924	1.02	0.03	-0.178	0.501	1.222	-0.412	0.535	-0.24	-0.29	-0.71	0.042	0.135	0.138	0.682	0.788	-0.074	0.68	1.005	-0.001
2035	0.995	1.457	-1.261	1.121	-0.707	0.165	-0.978	0.315	1.567	-0.318	0.777	-1.566	0.609	-0.548	2.259	1.785	1.436	0.581	-0.624	-1.274	-1.381	1.004	0.743	-0.183	-0.363	-0.453	-0.432	-0.111	0.696	-0.994	1.103	1.47	-1.097	0.816	1.119	0.134	-0.553	1.234	1.243	-1.439	-1.653	1.043	0.116	-0.383	0.148	1.59	1.326	1.32	0.893
57534	0.076	0.07	0.434	-0.148	1.532	0.104	0.906	0.679	0.51	0.553	1.398	0.81	1.904	0.408	0.989	1.016	0.498	0.98	0.285	0.891	0.597	0.335	0.533	0.5	0.758	0.185	0.508	0.574	-0.196	-0.005	0.2	0.79	1.169	0.319	0.71	1.918	0.002	1.184	1.291	0.258	1.14	0.417	0.615	0.75	0.46	0.302	0.739	0.86	0.577
54578	0.011	0.162	0.229	0.023	-3.013	-0.111	-0.006	-0.818	-6.776	0.034	-0.259	0.352	-2.217	-0.238	0.076	-1.407	0.117	-0.822	0.015	-0.227	-0.208	0.013	0.131	-0.215	-2.647	-0.201	-1.273	0.345	-0.092	0.422	0.05	-1.064	-0.534	-1.313	-0.229	-2.395	0.44	0.006	-4.704	-0.455	-6.13	-2.257	-0.339	-0.547	0.065	-0.232	-0.034	-0.614	-4.03
25920	-0.3	1.207	-0.313	0.722	0.836	0.068	1.012	0.004	1.081	0.838	0.384	0.296	0.3	0.961	0.038	0.753	1.062	0.655	0.229	0.047	0.089	0.363	0.008	0.39	1.241	1.024	0.792	0.241	0.902	0.521	0.27	0.419	0.344	0.719	0.861	0.585	0.45	0.491	0.232	0.066	0.033	2.085	0.589	1.034	0.692	0.375	0.994	0.693	0.876
23270	0.046	-0.543	-1.188	0.446	-1.55	-0.458	-0.227	0.073	1.085	-1.032	-0.217	-0.183	0.83	-0.008	-0.17	-0.076	-0.557	0.743	0.529	0.065	0.747	-1.239	-0.18	1.558	-0.197	0.369	-0.631	-1.124	-1.065	-0.685	-0.874	0.181	-0.785	0.747	0.756	-0.338	0.008	0.511	-0.257	0.898	0.232	-0.506	-1.203	0.599	0.098	1.014	-0.068	-1.313	0.818
134	0.954	3.108	1.358	-0.065	-0.942	1.049	-0.721	-0.013	0.538	0.154	0.643	-0.269	-0.741	-0.201	-0.441	-0.509	-0.669	-0.006	0.805	1.077	-0.326	0.364	-0.951	-0.011	0.251	1.643	0.016	0.243	0.478	2.031	-0.226	0.027	-0.402	-0.416	1.173	-1.078	-1.096	0.645	-0.789	-0.138	-1.019	-1.3	-0.269	0.248	1.485	-0.309	-0.565	0.49	0.815
203076	0.258	-0.101	-0.213	0.195	0.265	-0.31	0.413	-0.795	0.402	0.27	-0.139	0.078	-0.081	-0.406	-0.052	-0.015	-0.063	-0.06	0.316	0.295	-0.42	-0.375	0.002	0.175	0.112	0.891	-0.179	0.219	-0.433	0.054	0.092	-0.798	-0.297	-0.726	-0.081	-0.142	0.277	0.301	-0.094	0.179	-0.015	0.632	0.293	-0.329	-0.043	-0.717	-0.277	0.03	0.057
389177	-0.192	-0.181	-0.107	0.433	0.259	-0.342	0.378	-0.12	0.068	-0.85	-0.274	0.328	0.098	-0.471	0.418	-0.529	-0.39	0.007	-0.569	0.199	-0.568	-0.96	-0.088	0.212	0.129	-0.742	0.251	-0.155	-0.252	-0.384	-0.113	0.235	-0.336	-0.561	-0.147	-0.19	-0.078	-0.221	0.059	0.465	0.182	0.178	0.319	-0.881	-0.93	-0.197	-0.532	0.098	0.744
649618	0.615	0.991	2.439	0.018	-0.126	3.569	1.829	3.687	0.536	-0.001	1.084	0.421	-0.513	-0.352	0.512	-0.178	3.111	0.143	4.545	0.428	0.292	0.078	0.136	0.374	0.815	0.905	0.478	0.211	-0.156	0.935	0.581	1.398	0.18	1.907	3.546	0.23	0.133	3.77	0.294	1.009	0.38	0.057	0.422	0.387	0.273	0.175	-0.402	0.934	-0.119
5738	-0.579	1.274	-0.175	-0.966	0.288	0.695	0.063	1.402	-0.425	0.831	1.594	-3.111	0.886	1.139	-2.767	-2.386	1.387	-0.1	-0.134	-1.033	0.508	1.938	0.798	0.496	1.02	0.19	1.589	0.721	0.323	0.973	2.212	0.264	1.118	-0.326	1.784	-0.174	0.293	0.757	0.623	-0.055	1.192	2.383	1.65	1.15	1.887	-0.025	1.277	2.114	0.493
10801	-0.115	1.721	-0.071	0.137	0.404	0.721	0.283	0.728	1.016	0.275	0.742	0.319	0.457	0.708	-0.168	-1.508	0.498	0.117	1.025	0.136	0.433	0.054	0.061	-0.726	0.002	0.94	0.417	0.82	0.877	0.384	0.552	0.118	0.534	1.232	0.849	0.187	-0.046	1.146	-0.261	-0.17	0.247	0.929	1.163	0.668	0.419	-0.139	0.506	0.343	1.124
23151	-1.277	-1.855	-1.696	-1.163	-1.027	-0.643	0.223	-0.907	-1.871	-0.791	0.343	-0.873	-1.355	-1.686	-0.174	-0.896	-1.286	-0.237	-1.39	-0.14	-1.44	1.036	-0.954	-2.161	-0.577	0.246	-0.331	-0.788	0.671	0.251	-0.19	-0.177	-0.205	-1.398	-0.777	-1.173	0.323	-0.532	-3.074	-2.126	-3.155	-2.405	-0.736	-1.725	-1.048	-1.97	-0.309	-1.275	-1.691
26998	-0.533	-6.164	-0.887	0.271	-3.198	-0.559	1.839	0.393	0.921	-0.799	-1.481	0.163	0.2	-0.291	-2.992	-0.643	-0.808	-1.707	-5.63	-1.548	-0.664	-4.688	-3.08	0.429	-2.477	0.007	-4.513	-5.007	-2.565	-3.692	-0.412	-0.591	-3.36	0.234	-1.663	0.169	-0.832	-1.847	-1.064	0.808	2.696	0.025	-4.667	-0.104	-5.163	-0.086	-2.475	-1.467	-2.803
339487	0.227	-0.173	0.529	-0.789	-0.058	0.36	0.764	0.015	-0.032	-0.045	-0.25	0.773	-0.289	-0.373	-0.187	-0.192	0.339	-0.644	0.121	-0.594	-0.264	0.61	0.628	0.338	0.057	0.238	0.293	0.246	-0.568	0.123	0.399	-0.464	0.602	0.218	-0.593	-0.772	0.486	0.088	0.795	0.758	0.912	0.081	0.686	0.097	0.782	0.282	0.147	0.844	-0.9
80184	0.503	0.584	0.979	1.25	-0.12	0.668	-0.576	0.595	0.766	-0.264	0.801	1.995	2.025	-0.035	-0.179	0.6	0.432	1.552	0.625	-0.186	0.366	0.246	0.107	0.646	-0.543	0.211	1.291	-0.667	-0.675	-0.45	0.313	2.365	-0.126	0.927	1.059	0.667	-0.059	0.175	1.786	1.29	0.221	0.938	1.396	0.955	0.249	0.11	0.313	0.562	1.272
10249	0.041	-2.276	-0.35	0.606	-2.764	-1.111	0.274	-0.805	-5.433	-1.014	-2.203	-0.045	-3.361	-1.123	-0.927	-0.876	-0.473	-6.406	-3.623	-6.22	-0.893	-0.714	-1.066	0.084	-6.482	-1.212	-5.658	0.76	-0.639	0.482	-0.878	-1.111	-1.662	-1.858	-3.172	-5.179	-0.089	-0.883	-1.49	-0.011	-0.122	-6.086	-6.335	-1.363	-2.036	-0.081	-1.442	-0.445	-6.137
84532	-1.674	-0.016	-0.999	-1.702	-0.156	0.237	1.409	1.059	0.458	-0.458	1.058	-1.271	-0.186	1.272	-0.107	-0.581	0.58	0.901	-0.193	1.58	0.281	0.459	-0.438	0.352	-0.071	-0.442	0.457	-0.145	-0.512	-1.063	0.746	1.004	0.882	1.792	1.347	-0.038	-0.528	0.001	1.448	0.323	1.232	2.724	1.603	1.357	-0.123	0.314	1.521	0.103	0.398
196707	-0.034	0.012	0.145	-0.31	0.287	-0.061	-0.131	-0.34	-0.312	0.632	-0.405	0.171	-0.391	-0.159	0.31	0.105	-0.091	-0.319	-0.392	-0.216	0.005	-0.369	-0.166	-0.036	0.054	0.106	-0.6	-0.636	-0.686	-0.006	-0.359	-0.517	-0.665	-0.327	-0.105	-0.058	0.393	0.426	-0.027	-0.01	-0.071	0.479	0.142	-0.404	-0.066	-0.346	-0.056	0.252	0.473
285398	-0.779	1.87	0.198	-0.023	0.346	0.304	2.668	-0.398	2.043	1.072	0.68	-0.127	1.183	2.263	0.125	1.132	1.817	2.965	1.728	0.328	0.495	1.004	1.268	1.45	0.53	1.444	0.926	0.485	2.095	0.473	1.459	0.56	0.07	0.942	0.434	0.779	-0.129	1.868	1.193	0.642	0.864	2.009	1.474	1.44	0.206	0.865	2.248	0.427	0.928
4052	-0.678	-1.276	-1.992	-0.57	-0.807	0.664	-1.477	-1.504	-0.529	-1.631	0.312	-2.27	-1.219	-0.301	-1.272	-2.883	-0.407	0.481	-0.086	-2.807	-1.07	-0.818	-0.24	-1.059	-0.618	-0.591	-0.139	-2.517	-0.546	-2.179	-1.703	-0.835	0.125	0.312	-1.551	-0.292	-1.632	-1.563	-3.481	-1.065	-1.091	0.429	-0.808	-0.639	-0.184	0.45	-2.891	-0.93	-0.146
23533	-0.326	-0.736	-1.001	-0.126	-1.555	0.554	-1.609	-0.818	-2.023	-0.894	0.518	-2.203	-0.534	-0.701	-0.769	-0.917	-0.857	0.585	-0.349	-0.548	0.281	-1.234	-1.055	-1.234	-0.785	-0.961	1.526	-1.682	-1.061	-0.681	-1.582	-0.125	-0.111	1.812	-1.434	-1.789	-0.639	-1.835	-0.286	-1.606	-2.528	-0.098	-0.124	-0.348	0.013	0.817	1.1	-2.352	-0.65
6614	-1.66	-1.779	-2.282	-0.34	-2.184	-1.007	-2.582	-1.229	-4.299	-1.022	-0.575	-3.375	-1.159	-0.991	-2.294	-2.46	-2.955	0.265	-1.609	-1.345	-1.098	-2.781	-2.789	-1.169	-0.171	-2.164	0.539	-2.081	-1.317	-1.209	-2.019	-0.267	-0.662	0.291	-3.396	-2.269	-0.779	-2.984	-1.128	-2.522	-4.224	-0.796	0.54	-1.712	-1.116	-1.123	2.18	-3.188	-3.075
317662	0.723	1.066	0.716	-0.052	0.983	-0.153	0.304	0.657	2.155	0.984	-0.348	-0.102	0.904	0.361	-0.333	1.332	-0.135	0.662	0.913	1.093	-0.034	0.44	0.898	-0.285	0.426	0.601	0.278	0.041	2.51	1.265	0.432	0.248	0.463	-0.309	1.099	0.75	0.702	0.507	-0.193	-0.189	0.716	-0.161	0.34	-0.625	0.785	0.718	0.13	1.232	2.689
5309	-0.034	-0.116	-0.163	0.484	0.448	-0.542	-0.757	-0.95	0.1	0.259	-0.663	0.187	-0.179	-0.079	0.446	0.055	-0.129	0.018	-0.08	-0.118	-0.511	-0.144	0.193	0.112	-0.115	0.37	0.076	0.184	0.21	0.423	-0.006	-0.537	-0.055	-0.423	-0.094	0.389	0.3	0.152	-0.313	0.432	-0.048	0.545	-0.235	-0.036	0.247	-0.535	-0.148	0.189	0.293
55643	-0.392	1.452	0.093	0.377	0.965	-0.486	0.509	-0.503	1.174	0.641	-0.221	-0.077	0.149	1.094	0.085	0.617	0.354	0.601	0.199	0.788	-0.148	-0.43	0.363	-0.605	0.654	1.297	-0.157	-0.139	0.317	0.724	0.003	0.237	-0.336	0.364	0.731	0.883	0.567	-0.341	-0.065	-0.645	-0.183	1.345	0.591	0.887	0.69	-0.284	0.132	0.749	0.921
10234	0.353	0.347	0.521	0.325	-1.229	0.039	-1.755	-0.102	-0.231	-0.303	-0.283	-0.03	0.855	1.367	-1.705	-1.584	-0.931	1.516	2.294	-0.116	0.871	-0.692	0.431	-0.633	-0.072	-0.67	-0.294	-1.617	0.585	-0.692	-1.7	2.313	-0.086	-0.371	-0.043	1.52	-1.944	-1.444	0.056	-0.963	-2.241	0.132	-2.391	0.635	0.33	2.243	0.279	-0.696	0.643
421	0.523	0.672	-0.847	0.016	-0.709	-0.609	-0.079	-0.074	-0.089	-0.033	-0.735	-0.314	0.536	-0.172	0.036	-0.541	-0.436	0.955	-0.285	-0.64	-0.577	-0.138	-0.182	-0.296	-0.687	-1.255	0.6	-0.228	-0.55	-0.755	-0.666	0.487	0.258	0.005	-0.571	-0.457	-0.608	-0.57	-1.134	-1.014	-1.423	-0.045	0.389	-0.483	-1.001	-0.481	0.405	-0.178	0.167
55766	0.891	-0.14	-0.898	-2.03	-0.027	0.657	1.432	0.361	-0.941	-0.446	-0.63	1.279	1.355	-0.537	0.091	2.032	0.342	-0.272	-1.146	-0.589	0.479	0.844	0.89	0.077	0.859	0.486	0.907	0.501	1.951	2.075	-0.521	0.968	-0.18	-0.116	0.022	0.381	0.54	-0.17	-0.89	-0.205	1.042	-1.275	0.045	0.001	0.122	-0.1	-0.436	0.157	0.237
126432	0.665	-1.519	0.515	0.603	-0.291	1.174	0.709	0.248	-0.418	4.141	0.644	-1.21	0.808	0.495	1.434	3.029	0.241	0.449	-1.564	-0.133	1.32	4.14	0.908	3.392	1.103	2.06	0.598	-0.297	0.139	0.101	0.193	0.581	0.837	-0.004	3.112	-0.246	0.972	0.372	-1.415	3.155	-0.38	0.705	1.346	-1.978	-1.749	0.931	2.052	-1.906	2.002
649299	0.351	0.053	-0.019	0.733	0.022	0.056	0.371	-0.773	-0.399	-0.342	-0.719	-0.231	-0.035	0.208	0.463	-0.155	0.136	0.47	0.267	0.329	0.185	0.133	0.255	0.145	0.249	-0.876	0.179	0.103	0.185	-0.113	0.148	0.035	0.137	0.039	-0.214	0.637	0.027	0.015	-0.179	0.512	-0.322	-0.522	0.235	-0.471	-0.268	-0.295	0.472	0.283	0.841
7301	0.176	2.81	-0.339	-0.966	0.511	0.885	1.204	-0.433	0.087	-0.4	0.683	-0.401	0.424	0.086	0.315	0.106	0.823	0.488	0.798	1.352	-0.775	-0.457	-0.149	-0.672	2.025	-0.466	2.84	-1.108	0.344	-1.184	0.079	-0.232	1.427	-1.307	2.058	0.987	-0.385	0.891	-0.053	-0.035	-2.49	3.785	3.701	-0.439	-0.07	-0.576	2.415	2.301	1.371
54964	0.737	2.236	-0.978	0.39	0.775	-0.607	1.6	0.858	1.279	1.298	-1.988	0.783	0.968	0.167	0.866	0.574	0.724	-0.41	1.383	-1.194	-0.926	0.222	1.245	-1.044	-0.239	0.86	-1.599	0.564	-0.22	0.481	0.864	0.025	-0.786	-1.106	2.36	1.377	1.84	0.493	-0.093	1.523	1.669	0.942	-2.078	0.53	0.27	-0.074	-0.84	1.65	2.043
60436	-0.583	0.658	-1.188	-1.044	0.754	1.634	-0.189	-0.675	1.492	0.778	0.451	-0.899	1.287	1.095	1.297	0.915	-0.121	1.109	0.68	1.973	0.309	0.135	0.306	0.032	1.912	-0.088	1.107	-0.012	0.881	-0.645	0.366	0.791	1.053	0.195	0.863	1.33	0.072	0.948	-0.671	-1.049	-0.824	2.005	0.91	-0.795	-0.94	-0.016	0.004	0.114	-0.09
2932	0.947	0.357	0.874	0.891	0.761	-0.377	0.305	0.367	0.633	0.201	-0.613	-0.002	0.12	-0.63	-0.389	0.258	0.724	-0.514	0.658	-1.049	-0.398	-0.469	0.808	-1.991	-0.151	0.453	-0.066	0.123	0.059	0.576	0.026	-0.121	-0.638	-0.141	0.495	-0.466	0.185	0.441	-0.053	-0.15	1.006	-0.275	-0.221	0.773	-0.999	0.601	0.402	0.861	0.148
2890	0.173	-0.193	-0.029	0.527	-0.861	-0.718	-0.291	-0.441	-0.331	0.32	0.325	-0.354	0.109	-0.154	-0.032	-0.297	-0.285	-0.507	0.11	0.031	-0.527	-0.435	-0.316	-0.02	-0.214	0.398	-0.198	-0.195	-0.2	0.258	-0.74	0.009	0.161	-0.819	-0.079	-0.567	0.067	0.143	-0.919	0.226	-0.08	-0.282	0.011	-0.01	-0.457	-0.409	-0.42	-0.138	-0.184
4521	1.189	1.101	1.33	-0.056	0.987	1.43	0.735	1.494	1.666	0.723	0.787	0.101	-0.087	-0.113	0.241	1.443	1.178	1.085	2.498	1.067	1.034	1.023	0.802	1.301	1.083	0.809	1.685	0.154	1.426	1.09	0.192	0.701	0.651	1.372	0.731	0.911	0.401	1.445	1.588	1.433	1.054	0.731	1.897	0.917	0.707	1.661	1.342	0.466	0.8
3624	0.743	0.095	0.199	1.239	0.786	0.825	0.341	0.525	-0.843	3.186	1.292	0.402	-0.132	-0.793	-0.967	1.965	2.373	0.328	0.633	-2.216	1.563	-0.134	0.809	1.026	2.357	1.735	-0.352	0.708	1.11	1.322	0.278	0.833	0.655	1.244	-2.598	1.617	-1.143	-0.567	0.089	-0.139	-1.631	1.804	-0.859	2.372	-0.067	-0.246	-0.539	3.018	0.472
5459	-0.019	-0.025	0.058	0.444	0.073	0.059	0.63	-0.494	0.068	0.103	-0.242	-0.074	-0.573	-0.085	0.305	0.085	-0.664	-0.255	-0.306	0.6	-0.409	-0.23	-0.347	0.022	0.196	0.253	-0.531	-0.41	0.231	-0.036	0.27	-0.868	-0.361	-0.452	-0.015	-0.421	-0.095	-0.236	0.161	0.263	-0.226	-0.539	0.381	-0.337	-0.295	-0.773	0.583	-0.015	0.301
11065	2.945	3.974	3.838	1.981	2.963	4.693	3.818	3.903	3.673	2.358	3.523	2.404	2.262	2.289	3.369	5.101	3.845	3.885	3.831	4.676	3.567	2.542	2.331	3.317	4.789	2.226	3.97	1.297	2.825	1.505	3.489	2.478	4.01	4.036	3.039	3.897	2.856	4.831	3.389	3.866	1.865	3.193	4.421	1.536	3.175	2.325	2.449	1.611	5.314
1284	0.899	0.537	1.086	-0.977	-0.05	2.311	-0.638	0.952	1.016	0.982	1.988	0.388	1.309	1.081	-0.196	1.033	1.113	2.704	1.643	1.24	1.027	1.384	1.318	0.812	-0.436	0.127	1.416	-1.155	1.291	0.534	0.468	1.514	1.32	2.006	0.335	1.369	-1.047	0.727	0.483	0.203	-1.85	-0.111	0.679	1.544	3.056	2.07	0.915	0.923	0.806
3050	-0.108	-0.047	-0.079	-0.372	0.343	-0.083	-0.165	-0.17	0.238	0.27	-0.627	-0.178	-0.07	-0.145	0.191	-0.094	0.053	-0.526	-0.232	-0.016	-0.559	-0.133	-0.576	0.015	0.356	0.166	-0.523	-0.386	-0.15	0.016	0.209	-0.811	-0.513	-0.736	-0.427	-0.214	-0.419	0.305	-0.701	0.182	-0.395	-0.283	-0.188	-0.77	-0.029	-0.777	-0.339	-0.513	-0.097
1965	-0.747	0.159	0.091	-0.477	0.25	-0.416	-0.186	0.178	0.433	-0.284	0.087	0.369	0.021	0.166	1.188	0.41	-1.465	0.347	0.317	1.172	-0.382	0.773	0.329	-0.079	0.311	-0.594	0.661	-0.434	-0.096	0.64	0.345	-1.725	0.149	-0.333	0.086	-0.116	-0.052	0.241	0.411	-0.987	-1.71	-1.563	-0.764	-0.161	0.385	-0.97	-0.266	-0.289	-0.344
6390	-0.195	-1.341	-0.156	-0.58	-0.891	-0.721	0.19	-0.364	-0.463	-0.134	-0.769	-0.305	-1.644	-0.934	-0.307	-1.054	-0.067	-2.142	0.13	-1.33	-1.005	-0.074	-0.067	0.255	-0.882	-0.076	-1.037	-0.001	-0.721	0.099	0.4	-0.959	-0.802	-1.327	-1.238	-1.178	-0.006	-0.716	-1.02	0.19	-0.067	-3.478	-0.892	-0.683	0.249	0.053	-0.216	-0.6	-1.793
55184	1.067	0.5	-0.174	-0.67	-0.765	0.316	0.373	0.813	-0.182	-0.012	0.578	-0.332	-1.241	-0.087	-0.388	-0.613	-0.057	-0.017	1.463	-0.273	0.677	-0.13	0.091	0.773	-0.096	1.089	-0.578	0.049	0.168	-0.058	-0.155	0.706	-0.482	0.086	0.379	-1.01	-0.133	0.469	0.977	1.138	0.573	0.201	-0.478	0.484	-0.372	-0.047	0.752	-0.434	-1.082
729425	0.055	0.265	0.067	-0.161	0.06	0.02	-0.308	-0.667	0.315	-0.031	-0.475	-0.091	-0.676	0.256	0.142	-0.169	-0.432	0.126	-0.281	-0.01	-0.481	-0.444	0.44	0.034	0.28	0.293	-0.677	-0.367	-0.298	-0.072	0.016	-0.425	-0.133	-0.844	0.168	0.315	-0.079	0.408	0.009	0.37	0.055	1.202	-0.166	-0.569	-0.637	0.099	-0.616	0.104	-0.165
27434	0.7	0.28	0.146	-0.361	-0.089	0.091	0.622	0.524	1.035	1.207	-0.137	0.101	0.538	0.774	-0.255	0.378	0.022	0.361	0.858	0.149	0.055	0.464	0.517	-0.074	0.134	1.021	0.32	0.352	0.849	0.549	-0.212	0.563	0.301	0.948	0.718	0.634	0.137	0.584	0.346	0.847	0.134	0.526	0.976	0.963	-0.121	0.212	0.568	0.17	0.993
53	-0.69	-0.927	-0.507	0.471	0.589	-0.782	0.264	-0.246	0.542	0.197	-0.554	-0.383	0.139	-0.546	-0.69	-0.091	-0.102	-0.106	-0.703	-0.382	-0.235	-1.052	-0.707	0.08	1.086	-0.071	0.011	-0.353	-1.192	-0.205	0.233	0.072	0.476	-0.436	0.13	-0.281	0.459	-0.816	-0.519	-0.151	-0.319	-0.025	-0.603	0.481	-1.622	0.017	-0.025	-0.563	0.193
527	-0.095	-1.001	0.031	-0.247	-0.223	0.538	0.193	-0.036	-0.182	0.386	0.047	-0.177	0.458	0.259	0.286	0.113	-0.363	-0.425	0.001	0.15	0.157	0.266	-0.233	-0.177	-0.327	0.254	0.686	0.144	0.045	0.418	-0.744	-0.949	-0.161	-0.069	-0.453	-0.588	-0.067	0.306	0.116	-0.122	0.279	-1.201	-0.348	-0.148	-0.016	-0.532	0.326	-1.123	-1.158
57167	-0.171	1.57	0.692	0.133	1.636	-0.65	0.573	-1.368	2.788	0.338	-0.388	-1.156	1.886	0.345	0.437	-0.377	-0.61	2.569	0.779	-0.054	0.871	-0.125	-0.478	-0.918	2.436	-0.865	2.216	-0.849	-0.028	-0.48	0.195	0	2.048	0.305	1.341	2.086	0.405	1.621	1.296	1.019	1.041	3.961	0.574	-0.104	-0.038	-0.34	0.041	0.38	2.573
51073	-0.235	-0.338	-0.105	-0.136	-0.298	-0.621	0.618	-0.597	0.361	0.214	-0.643	0.086	0.113	0.136	0.455	0.701	-0.076	-0.257	-0.438	0.076	-0.567	-0.613	-0.263	0.137	0.41	0.154	-0.341	0.397	-0.079	0.477	0.081	0.023	0.003	-0.206	0.257	0.213	0.504	0.181	-0.105	0.058	-0.09	0.362	0.154	0.115	0.005	-0.725	-0.628	0.051	0.142
2307	0.413	0.982	0.296	-0.252	-0.113	2.673	-0.225	-0.399	0.341	0.333	1.538	0.06	1.257	0.624	-0.158	0.036	0.677	2.778	1.63	-0.055	1.312	0.942	0.749	0.314	0.022	-0.185	0.766	-0.386	0.967	0.43	0.626	0.743	1.255	0.746	0.202	1.815	0.598	-0.274	-0.556	0.397	-0.548	0.456	0.168	0.478	2.645	0.809	0.156	0.752	1.551
146443	-0.203	-0.033	0.216	0.622	0.525	-0.543	0.258	-0.416	-0.182	-0.292	-0.63	0.33	0.209	-0.278	-0.18	0.54	-0.124	-0.054	0.215	0.187	-0.164	-0.708	-0.702	-0.39	-0.163	0.375	-0.42	0.168	0.034	0.328	-0.332	0.038	-0.557	0.513	0.136	0.067	0.727	0.241	0.275	1.046	0.165	-0.731	-0.078	0.096	0.854	-0.353	-0.648	-0.179	-0.254
54962	0.836	0.96	1.557	-1.437	0.792	0.105	1.215	0.954	0.147	0.876	0.89	1.365	-0.157	-0.153	0.73	2.096	1.543	0.421	2.117	0.513	0.775	1.387	0.458	1.042	0.126	0.065	1.241	0.517	0.615	0.549	1.229	0.945	1.185	1.143	1.058	0.371	0.556	1.376	1.224	1.641	1.444	0.61	0.48	0.596	0.055	0.665	0.928	1.887	0.763
26153	-0.105	-1.031	-0.616	-1.302	-0.98	-0.42	-0.678	-0.183	0.178	0.365	-0.037	-0.954	-0.263	0.422	-0.301	-0.375	-0.494	-0.271	-0.66	0.391	-0.158	0.739	-0.502	-0.358	-0.926	0.188	0.136	-0.296	0.543	-0.73	-0.685	-0.011	-0.119	-0.476	0.612	-0.355	-0.741	0.216	-1.228	-0.061	-0.666	-0.37	-0.782	-0.211	-0.576	-0.231	-0.768	-0.305	-0.32
10656	0.096	1.41	1.192	0.83	0.521	0.909	-1.253	0.3	0.6	-0.121	-0.521	0.108	-0.777	1.907	0.152	1.454	0.314	0.796	1.367	-2.664	1.109	1.06	1.457	-0.667	0.837	-0.848	1.215	-1.191	1.189	1.136	0.736	-0.215	0.916	0.604	-0.899	-1.126	0.443	1.939	-0.664	-1.513	-0.451	-0.583	0.538	-0.17	0.44	-0.062	2.473	-0.002	0.545
64850	-0.047	-3.42	0.284	1.355	-1.745	-2.144	-0.302	-1.196	1.213	-0.376	-1.347	-0.57	-3.126	-3.802	-2.088	0.526	-0.1	-3.714	1.376	-2.348	-0.773	-2.391	-2.248	0.425	-4.354	-0.533	-4.835	-0.547	-2.104	-0.589	-1.202	0.075	-4.022	-0.006	-2.105	-3.566	0.574	-0.434	-2.994	-0.852	-0.944	-3.075	-4.365	-0.754	-1.066	1.402	-0.944	-1.845	-3.69
57669	0.427	0.998	0.381	1.518	0.904	-1.095	0.691	-0.009	-0.542	0.095	-0.679	0.711	0.411	-0.181	0.055	0.189	0.974	0.598	0.952	0.527	-0.286	-1.003	-0.213	0.277	0.603	-0.968	-0.536	0.142	-0.106	-0.069	-0.309	1.212	-0.26	-0.506	0.59	1.073	1.097	0.095	0.747	0.672	-1.016	-1.627	-0.196	1.015	-0.811	1.352	-0.916	1.078	-0.685
3920	0.871	-0.54	0.569	0.839	-0.562	0.399	-0.127	0.077	-0.731	0.922	1.142	0.904	-0.033	-0.75	-0.744	-0.604	0.261	-0.296	-0.05	-0.105	0.123	0.757	-0.607	0.833	-1.336	1.251	-0.028	-0.328	0.365	0.832	0.683	0.68	-0.78	-0.77	0.304	-0.248	0.288	0.746	0.315	1.872	0.263	-1.847	-0.317	-0.151	0.352	0.726	-0.706	0.622	0.386
401472	-1.478	1.12	0.094	-1.404	1.392	0.805	1.181	1.493	0.919	1.655	-0.447	-1.579	1.023	-0.466	2.321	1.097	2.064	-0.274	0.169	1.239	0.454	0.74	2.298	-0.749	1.993	2.488	1.947	1.033	-0.422	1.683	1.224	0.194	1.296	1.021	-0.7	0.7	0.107	2.065	-0.424	-1.959	0.46	1.443	0.518	1.352	-0.031	-0.05	1.828	1.415	0.227
80714	0.001	0.167	0.087	-0.428	-0.718	0.493	-0.767	-0.575	-0.863	0.511	0.351	-0.319	0.243	-0.103	-0.285	-0.469	-0.364	-0.174	-0.477	-0.551	0.64	-0.303	-0.322	-0.091	-0.651	-0.048	0.422	0.242	-0.07	-0.458	-0.762	0.464	-0.173	1.078	-0.728	-0.473	-0.066	-0.236	-0.113	-0.591	-0.813	0.548	-0.417	-0.465	-0.832	0.321	-0.003	-0.357	-0.242
3149	-0.1	0.503	0.248	0.272	1.262	-0.004	0.865	0.715	-0.093	0.003	0.464	-2.157	-1.026	2.098	-1.97	1.311	1.467	-0.198	-0.338	-3.003	-0.462	1.936	0.242	2.247	0.659	-0.57	-0.647	-0.472	0.329	-1.902	0.947	0.599	-0.857	-0.226	1.759	-0.247	0.22	1.35	-0.129	1.17	-0.512	1.668	-0.429	0.194	0.512	-0.785	0.649	0.783	-0.586
64167	0.586	0.808	0.678	0.312	-0.854	-0.224	-0.697	-1.656	-2.417	-0.758	0.268	0.314	-0.079	-0.954	-0.763	0.881	-1.074	-0.015	0.277	-1.128	0.54	-1.257	-0.228	0.067	-0.908	-0.659	0.283	1.079	0.322	-0.144	0.105	1.531	0.044	0.993	1.342	-0.465	0.086	0.162	0.6	1.981	-0.069	0.812	-0.555	0.416	0.842	0.741	-0.228	-0.162	-0.071
440823	-0.486	-1.347	-0.683	-0.958	-2.052	2.162	-1.68	-0.084	-2.313	-0.108	1.593	-0.614	-0.223	-0.945	-0.037	-1.66	-1.552	0.771	-1.754	-0.137	2.314	-0.814	-1.261	0.088	-1.16	-0.42	0.194	-0.906	-0.322	-1.32	-1.04	0.469	0.502	4.907	-0.809	-2.04	-0.629	-0.843	0.573	-2.128	-0.987	1.493	-0.161	-0.512	1.824	2.314	0.412	-2.359	0.136
623	0.319	1.097	0.49	0.712	-0.004	0.352	2.267	4.206	-0.305	1.162	0.358	-0.198	0.19	0.485	-0.22	-0.322	0.442	0.761	0.443	-0.171	-0.288	0.451	-0.71	-0.11	0.264	0.664	0.953	-0.996	0.01	-0.361	0.359	-0.136	-0.697	-0.305	-0.884	-0.528	-0.808	1.677	0.474	-1.543	1.953	0.684	0.053	1.709	0.091	-0.401	-0.48	-0.843	0.232
574449	-1.901	-1.419	-1.125	-0.53	-1.007	0.009	-0.185	-0.891	1.079	0.305	0.602	-0.572	1.248	-1.407	-0.209	-0.552	-0.394	-0.451	-1.12	0.474	-1.313	0.204	-0.352	-0.724	-0.451	0.224	-0.56	-1.265	-0.984	-0.813	-0.583	-1.282	-0.894	-0.991	-1.435	0.034	-1.475	-0.445	-1.865	-2.175	-2.128	0.276	-0.824	-0.469	-0.786	-0.807	-1.676	-0.307	-0.349
4134	0.151	1.02	-0.03	-1.773	-0.183	1.247	-0.652	0.073	0.326	0.237	1.148	-0.528	0.646	0.258	-0.104	0.371	0.771	1.026	0.647	0.363	0.251	1.062	0.762	-0.863	0.593	0.175	0.715	0.317	1.356	0.025	0.224	0.291	1.291	0.908	0.133	0.603	0.368	0.5	0.031	-0.641	0.031	1.414	0.817	0.606	1.044	0.353	0.855	0.997	0.881
55808	-0.443	-0.885	-0.565	-1.141	-1.502	-0.288	-1.053	-0.022	-0.815	-0.453	-0.676	-0.769	-1.075	-0.23	-0.673	-1.261	-1.755	-0.965	0.46	-0.649	-0.627	0.07	-0.935	-0.187	-0.894	-0.589	0.034	-0.018	-1.003	-0.923	-1.035	-2.14	-0.977	-0.89	-2.019	-0.984	-1.02	-0.873	-0.019	0.014	-0.129	-0.675	-0.425	-1.704	-0.621	-0.816	-0.884	-1.136	-0.423
256329	0.242	-0.454	-0.719	0.742	-0.181	-0.809	0.264	-0.173	0.859	-0.04	-0.913	0.303	-0.376	-0.232	-0.44	0.149	0.145	-0.529	0.175	-1.231	-0.873	-0.481	-0.237	-0.162	-0.754	0.438	-1.176	-0.04	-1.518	0.639	-1.002	0.539	-0.827	0.468	0.527	-0.357	0.331	-0.301	0.152	-0.264	0.802	0.287	-0.511	-0.547	-0.96	-0.466	-0.22	-0.352	0.266
399827	-0.027	-0.055	0.043	0.038	0.133	-0.332	1.192	-0.721	0.681	0.606	-0.773	0.252	-0.413	-0.348	0.004	0.11	-0.357	-0.477	-0.389	0.416	-0.239	0.064	-0.096	-0.047	0.02	6.038	-0.49	-0.242	0.002	0.385	-0.216	-0.255	0.149	-0.159	0.532	0.317	0.01	-0.134	0.18	-0.393	-0.045	0.424	-0.013	1.259	-0.268	0.025	-0.208	0.197	-0.108
140880	-0.033	-0.155	-0.126	0.396	0.241	-0.139	-0.568	-0.04	0.232	0.088	-0.316	0.103	0.092	-0.218	0.344	-0.029	0.099	0.123	-0.113	0.146	-0.299	-0.082	-0.074	-0.34	0.318	-0.273	-0.269	0.038	0.138	0.055	0.249	-0.415	-0.247	-0.332	-0.168	0.089	0.182	0.149	-0.157	0.114	-0.275	0.498	0.056	-0.24	0.032	-0.437	-0.129	-0.002	0.184
286223	-0.06	-0.09	0.59	-1.27	-0.072	0.655	0.062	0.514	-0.699	0.266	0.723	0.277	-0.179	0.073	-0.076	-0.776	0.165	0.037	0.035	0.012	-0.78	-0.944	-0.495	2.863	-0.332	-1.341	0.028	-0.541	1.052	-0.272	-0.121	0.97	0.288	0.51	0.165	0.7	-0.377	1.842	-0.261	-1.736	-0.211	-0.721	-0.487	-0.743	1.355	0.996	1.066	0.021	-1.185
80736	-0.8	0.442	-0.131	-0.294	-0.231	-0.212	1.158	0.444	2.068	0.214	2.23	-0.232	-0.134	-1.01	0.542	-0.497	0.842	-0.314	3.286	-0.045	0.486	-0.726	0.241	-2.191	1.135	0.463	-0.76	1.799	0.95	1.223	-0.403	2.048	0.584	-0.287	-4.228	0.402	-0.402	-0.178	0.182	-0.644	0.452	0.275	-1.065	-0.145	0.816	-0.292	-1.594	0.625	-0.095
4287	-0.078	-0.116	0.294	0.601	0.706	-0.241	-0.508	0.152	-0.474	0.341	-0.165	0.5	0.387	0.298	0.444	-0.338	-0.859	-0.092	0.805	0.403	-0.457	0.205	0.386	-0.534	0.717	-0.031	0.071	-1.319	0.028	0.256	0.655	-0.314	0.066	-0.45	-0.204	-0.716	-0.091	-0.574	0.034	-0.005	-0.553	-0.365	-1.022	0.081	0.639	0.063	-0.252	0.512	0.927
4838	0.054	0.556	0.12	0.121	0.83	-0.125	0.842	-0.442	0.381	0.371	-0.137	-0.093	0.212	-0.015	0.477	-0.112	-0.117	-0.227	-0.277	0.624	0.176	0.045	0.004	-0.076	0.059	0.601	-0.076	-0.052	-0.173	0.353	-0.323	0.187	0.325	-0.67	0.2	0.848	0	-0.203	0.154	0.423	-0.026	-0.066	0.186	0.142	-0.269	-0.935	0.21	0.256	-0.038
27201	0.207	-0.129	0.058	-0.285	0.15	0.043	-0.097	-0.145	0.157	0.419	-0.281	0.159	-0.337	-0.102	0.391	-0.039	0.076	-0.168	0.186	0.235	-0.374	-0.023	-0.078	-0.137	-0.205	0.183	-0.275	0.016	-0.36	0.376	0.361	-0.536	-0.332	-0.541	-0.094	0.026	0.373	0.186	-0.435	0.416	0.09	-0.608	0.172	-0.335	-0.27	-0.294	-0.006	-0.14	-0.297
9121	-0.812	-0.362	-1.384	-0.539	1.553	-0.96	-0.99	-0.294	-0.05	-0.162	-0.797	-1.604	-0.752	-0.478	-0.807	-0.404	-0.88	1.105	-0.661	-0.599	-0.675	-0.911	-0.93	-0.69	-1.562	-1.117	-0.042	-1.153	-1.496	-0.777	-0.427	-0.331	-0.187	-0.814	-0.975	1.575	-0.809	-1.361	-1.055	-2.008	-0.658	1.873	-0.76	-0.262	-1.334	-0.654	-0.524	-0.321	0.068
283592	-0.2	-0.246	-0.693	0.656	-0.209	-0.255	-0.152	-0.434	0.237	-0.213	-0.288	0.07	-0.473	-0.089	-0.015	-0.064	-0.078	-0.551	-0.206	-0.106	-0.249	-0.153	-0.339	-0.188	-0.048	-0.098	0.43	0.477	0.107	0.191	-0.22	-0.287	0.35	-0.187	0.124	-0.064	0.376	-0.032	-0.166	-0.091	-0.244	0.799	-0.087	-0.033	-0.033	-0.153	-0.617	0.269	0.444
7805	0.191	-1.081	-1.143	-1.207	-0.572	1.035	-1.361	-0.233	-2.398	-1.798	1.402	-2.993	-0.597	-1.102	-0.385	-0.94	-0.084	0.675	-0.349	0.452	0.737	-0.551	-0.716	-0.415	-0.029	-2.196	1.687	-1.782	-0.654	-0.863	-1.715	-1.422	0.594	0.849	-2.931	-1.66	-0.218	-1.103	0.073	-1.053	-2.86	-1.788	0.232	-1.454	0.291	0.56	1.813	-2.714	-1.508
1282	1.127	1.291	1.202	-0.149	0.041	1.949	-0.621	1.903	0.021	1.201	1.809	0.637	1.529	1.279	0.082	0.775	0.961	2.29	1.682	1.808	1.241	1.374	1.114	0.551	-0.126	0.413	1.468	-1.109	1.131	0.358	0.361	1.807	1.145	2.387	0.308	0.912	-0.386	0.962	0.945	0.342	-1.363	-0.232	1.347	1.8	2.512	2.048	0.538	1.373	1.835
5319	1.252	-0.142	1.249	1.127	0.419	0.767	3.235	0.022	5.937	-0.26	2.809	-1.122	3.515	-0.152	1.333	0.675	2.242	-0.807	5.317	6.04	0.65	2.649	1.648	-1.154	1.267	-1.167	1.374	1.312	2.056	0.237	0.631	2.626	0.304	0.924	0.711	4.34	2.109	1.582	-0.032	1.83	5.105	-0.454	0.497	1.006	0.591	-0.157	4.507	1.83	-0.015
5028	-0.273	0.285	-0.804	-0.402	-1.407	0.275	-0.226	-0.747	-2.563	-0.848	0.04	-1.548	-1.041	0.228	-0.117	0.134	-1.226	0.109	-0.772	0.327	-0.25	0.973	-1.174	-0.402	-1.863	-0.145	1.037	-1.099	0.352	-1.568	-0.36	-1.925	-0.257	0.067	-2.164	-0.955	-1.119	-0.398	-0.195	0.579	-2.318	1.091	-0.564	-0.706	0.192	-0.01	0.839	-0.821	-1.198
58527	-0.846	-0.903	-0.765	-0.086	-0.764	0.054	-1.133	0.017	-1.897	-1.355	-0.173	-1.63	-1.951	0.339	-1.961	-3.214	-1.293	-0.669	0.079	-2.419	0.458	-2.594	-0.278	0.128	-0.933	-1.445	-0.442	0.216	-1.916	-0.507	-1.888	-1.443	-0.623	0.405	-1.117	-2.438	-0.185	-2.36	-1.631	-0.305	-0.301	-3.123	-0.962	-1.381	-0.852	0.649	1.594	-1.156	-2
402377	0.394	0.485	1.337	-0.506	1.772	0.054	1.447	0.419	1.71	-0.002	-1.393	1.837	0.1	0.189	1.032	1.265	-0.033	-0.793	2.164	0.256	0.335	0.805	-0.22	1.526	-0.33	1.264	0.087	0.428	0.082	0.908	0.891	0.119	-0.568	0.516	1.433	0.511	1.186	1.393	1.084	2.384	1.174	0.566	-1.049	0.957	0.476	0.322	0.963	0.221	1.292
84070	0.76	0.046	0.043	0.221	0.525	-0.355	-0.275	-0.284	0.387	0.372	-0.713	0.266	-0.45	0.113	-0.397	0.49	-0.771	-0.208	0.1	-0.474	0.348	-0.101	0.025	0.231	-0.372	0.666	-0.384	0.655	-0.184	0.899	-0.311	0.2	-0.47	-0.813	0.102	0.257	0.237	-0.114	-0.031	0.396	0.354	-0.546	0.131	0.17	0.409	-0.652	-0.219	0.182	0.188
1259	-0.534	-2.376	-1.065	0.796	-0.928	-4.093	0.224	-1.287	1.395	0.434	-2.172	-2.096	1.14	-1.017	-1.236	-0.529	-3.21	-0.614	-3.625	-0.146	-1.563	-5.432	-3.538	0.205	-2.768	0.463	-5.062	-3.707	-2.278	-3.888	-1.027	-0.332	-1.854	-5.363	-0.122	1.483	-2.202	-0.943	-1.41	-1.967	-1.309	-4.522	-6.413	0.008	-5.052	-1.102	-2.559	-2.478	-0.437
9019	0.499	1.62	1.102	0.399	0.292	1.036	-0.375	0.977	0.758	1.181	1.762	0.111	0.59	0.167	0.558	0.012	0.69	0.815	1.01	1.504	0.853	1.59	0.945	-0.287	0.934	0.069	0.908	0.313	0.481	0.758	0.819	-0.549	1.156	0.229	0.806	0.371	0.705	1.703	0.096	0.777	0.266	0.203	1.072	0.053	1.065	0.368	0.083	1.787	2.513
84081	-0.242	-0.723	0.013	0.379	0.024	0.096	-0.462	-0.182	-1.063	0.792	-0.247	0.58	-0.011	-0.304	0.452	0.668	-0.332	-0.235	-0.089	-0.441	-0.091	0.706	0.298	0.085	-1.374	-0.281	-0.043	0.266	-0.053	-0.065	-0.242	0.254	-0.312	-0.366	-0.334	-0.324	-0.058	0.381	-0.787	0.159	-0.453	-3.151	-0.61	-0.764	0.327	-0.345	0.046	-0.358	-0.671
54797	-0.112	-0.461	0.304	1.669	-1.253	-0.623	0.075	-0.073	0.348	2.155	-0.079	1.254	-0.658	0.842	-1.341	0.397	-0.212	-1.553	-0.303	-1.038	0.608	0.412	-0.284	-0.063	-0.19	1.268	0.641	1.154	-0.57	0.503	0.291	-0.344	-0.304	-1.518	0.328	-1.534	0.853	-0.567	0.328	1.397	-0.256	-0.367	0.03	0.25	0.133	-0.116	0.108	-0.709	1.736
79848	0.217	0.487	1.444	-0.635	1.844	0.469	-0.525	0.299	0.212	0.086	0.955	0.808	0.413	0.654	1.843	1.523	0.13	1.093	-0.697	0.59	0.592	2.375	1.053	0.306	0.76	-0.728	1.723	0.555	2.217	1.25	-0.202	0.576	1.69	0.091	0.886	1.958	-0.441	1.237	0.141	0.643	0.131	0.577	1.881	-0.346	0.066	0.17	0.98	0.421	0.305
338657	0.09	0.522	-0.12	-0.269	-0.495	0.481	-0.262	0.36	-0.809	-0.209	0.006	0.884	0.197	-0.084	0.1	0.046	0.409	0.793	0.507	-0.699	-0.002	-0.166	0.031	0.576	-0.094	-0.479	0.492	0.093	-0.297	-0.909	0.066	1.234	0.113	0.866	0.711	0.586	-0.737	0.307	1.385	-0.239	-0.247	1.968	0.171	-0.583	0.453	0.57	-0.294	0.626	0.041
4085	1.935	1.106	3.964	0.408	2.308	0.986	1.814	3.352	1.548	1.556	2.092	1.522	1.169	1.531	2.344	2.171	2.932	2.074	3.035	2.544	2.684	2.413	1.061	3.665	2.384	1.099	3.406	0.696	2.144	1.293	0.593	1.691	2.527	2.652	0.581	1.663	1.33	2.861	3.936	2.881	1.312	-0.016	2.602	-0.007	1.666	1.926	2.122	-0.034	1.775
90288	2.142	-0.834	0.121	2.857	-2.507	2.927	1.322	-0.917	-0.333	-0.922	-1.932	-0.836	-0.868	-2.126	-0.613	-1.677	-0.968	0.998	0.506	-1.364	-2.071	-2.025	-0.51	-2.924	-1.049	0.254	-0.036	-0.912	2.966	3.616	-2.912	3.213	-1.738	-3.198	-1.01	-1.603	-1.149	0.741	-1.131	1.472	-1.203	-2.769	-0.804	-1.378	2.182	0.262	0.581	-1.471	0.07
140775	-0.331	-0.041	0.152	-0.069	0.139	-0.573	-0.283	-0.704	0.609	0.259	-0.501	-0.402	-0.584	0.106	-0.312	-0.006	0.318	-0.523	-0.33	-0.31	-0.867	-0.151	0.203	0.584	-0.793	0.313	-0.726	-0.46	-0.954	-0.065	-0.217	-0.627	0.281	-0.086	0.671	-0.221	0.351	0.06	-1.085	0.306	-0.004	-0.584	-0.306	-0.331	0.327	-0.556	0.183	0.183	-0.484
150160	-0.121	-0.114	-0.096	0.269	0.068	-0.641	0.26	-0.558	0.041	-0.038	-0.605	-0.068	-0.547	0.036	0.215	0.147	-0.522	-0.189	-0.319	-0.294	-0.381	0.024	-0.292	0.354	0.031	0.708	-0.339	0.224	-0.408	0.496	0.095	0.043	-0.568	-0.518	-0.132	-0.465	0.121	0.069	-0.428	-0.056	-0.094	-0.13	-0.126	-0.034	0.017	-0.019	-0.245	-0.056	0.183
30835	-0.154	-0.245	-1.551	-1.422	-1.325	-1.108	-1.016	0.628	-2.057	-0.66	-0.502	-1.6	-1.642	-0.502	-1.986	-0.493	-1.555	-0.34	-1.851	0.14	-1.566	-0.58	-0.607	-1.389	1.368	-1.248	1.284	-0.228	-0.274	-1.023	-0.764	-0.779	0.157	-0.839	-2.254	-0.897	-0.657	-0.935	0.202	0.463	-2.125	-0.557	1.109	-2.022	-0.505	-0.733	3.355	-1.586	-0.888
54825	-1.74	-1.027	-4.362	-1.873	-3.911	-1.674	-2.329	-3.858	-1.155	-2.416	-1.722	-5.981	-1.497	-4.474	-0.911	-6.759	-4.768	-3.021	-6.305	-2.786	-2.631	-5.497	-2.527	-5.987	-2.86	-6.269	-4.029	-0.47	-4.109	-5.655	-6.501	-2.244	-2.874	-3.659	-5.842	0.461	-5.004	-6.142	-6.735	-5.674	-0.789	-1.489	-5.962	-3.84	-5.36	-6.105	-0.804	-5.144	-4.966
51308	0.006	0.051	-0.1	0.169	0.638	-0.489	-0.372	-0.836	0.748	0.069	-0.711	0.065	0.279	-0.106	0.547	-0.112	-0.248	0.147	-0.645	0.254	-0.297	0.345	0.37	0.3	0.346	-0.065	-0.135	0.276	-0.394	-0.113	-0.253	-0.522	0.329	0.228	-0.217	0.535	0.618	-0.339	-0.485	0.642	0.11	0.511	0.215	-0.369	-0.143	-0.243	-0.315	-0.111	-0.196
55997	0.02	-0.186	0.116	-0.078	0.017	-0.223	0.32	-0.31	0.243	0.483	-0.216	0.069	0.04	-0.055	0.308	-0.104	-0.117	-0.211	-0.426	-0.082	-0.179	-0.518	0.025	-0.024	0.074	0.257	-0.136	0.345	-0.154	0.274	-0.181	-0.093	-0.203	-0.352	-0.011	-0.145	0.163	0.004	-0.323	0.116	-0.189	0.357	-0.199	-0.204	-0.202	-0.542	-0.098	-0.288	-0.005
57148	-0.059	0.58	0.72	-0.116	0.377	0.907	0.518	0.514	0.62	0.381	0.263	0.346	0.062	-0.547	0.688	0.335	0.86	-0.052	0.854	0.823	0.057	0.14	0.409	-0.131	0.526	-0.394	0.84	0.018	0.124	0.238	0.431	0.228	0.93	0.865	0.733	-0.102	0.669	1.449	0.383	0.347	0.975	0.927	-0.177	0.055	0.056	0.545	-0.054	0.426	0.209
3985	-0.751	0.578	0.157	-0.946	-0.307	0.643	-1.2	1.205	-1.665	0.089	1.73	-0.519	0.488	1.149	0.146	0.754	1.559	0.06	-1.038	0.794	1.89	1.066	-0.127	-0.969	1.374	0.232	1.059	0.424	-0.013	-0.388	1.363	1.082	1.457	1.313	1.118	-0.981	0.528	0.795	-0.205	-0.872	-0.97	1.872	1.254	0.9	0.449	-0.679	-0.379	1.288	1.506
144699	1.107	0.023	-0.465	0.691	-0.105	0.073	-0.114	-0.268	-0.843	0.052	0.145	-0.278	-0.55	-0.28	-0.196	-0.25	0.714	-0.202	-0.041	0.218	0.119	-0.018	-0.253	-0.362	-0.428	-0.373	-0.42	0.072	0.281	0.225	-0.99	0.194	-0.556	0.46	-0.767	-0.431	0.009	-0.264	-0.345	0.607	0.531	-0.899	-0.371	0.192	-0.155	0.207	0.507	-0.215	-0.038
5970	-0.003	-0.157	-0.396	-1.018	0.104	-0.472	0.204	-0.267	-0.246	0.425	0.399	-0.578	0.073	0.465	-0.199	0.277	0.232	-0.577	0.792	0.404	-0.029	1.462	0.642	0.12	0.317	1.386	0.269	0.394	-0.059	0.582	0.086	-0.705	-0.07	-0.421	-0.205	0.222	0.429	-0.257	0.368	-0.362	0.196	0.072	-0.248	-0.068	0.409	0.074	0.073	0.115	-0.93
148229	0.624	1.348	2.518	0.843	-1.306	1.607	-0.393	2.058	0.336	0.938	1.283	-0.679	-0.97	-0.475	1.174	1.255	0.834	-0.121	1.418	0.9	0.635	-0.191	-0.491	0.752	-1.162	-1.391	0.938	0.973	0.014	0.99	-0.035	0.68	0.875	1.481	2.603	0.086	0.624	1.601	1.379	1.934	0.509	-1.027	2.538	1.057	-0.037	1.316	2.432	0.231	0.031
9754	0.405	-0.206	0.242	-0.181	-0.558	-0.177	-0.403	-0.705	0.493	-0.455	-0.272	-1.579	-0.205	1.008	-1.642	1.569	-1.421	-0.694	0.006	-0.319	0.068	-0.803	-0.312	0.736	-1.308	-0.235	0.206	-0.564	1.472	-0.032	-0.437	-0.402	-0.171	-0.645	0.098	-1.111	-1.074	0.826	0.829	-0.473	-0.213	-2.774	-0.035	0.424	-0.278	0.086	0.827	0.068	0.05
23590	0.829	0.555	0.834	-0.506	1.168	0.845	-0.303	1.053	0.639	1.29	-0.116	-0.726	1.428	0.528	-0.412	0.328	1.466	0.557	-0.07	1.144	0.739	1.033	-0.055	0.051	1.278	0.079	2.058	0.131	0.846	-0.155	0.225	0.317	1.566	1.081	-0.179	0.04	0.17	0.784	-0.269	0.74	0.153	1.062	1.819	1.791	0.132	0.085	0.207	1.682	1.196
10243	-1.351	0.796	-0.329	0.137	-0.846	-1.418	-0.007	-0.844	-0.902	-0.292	-1.113	0.748	-0.822	-0.101	-0.568	-2.184	-2.831	-1.344	-0.362	-0.824	-1.633	-0.767	-1.618	-1.144	-0.695	-0.247	-1.418	-0.898	0.301	0.985	-0.604	-1.126	-1.219	-2.325	-1.056	-0.593	-0.407	-1.95	-1.468	-1.066	-0.3	-2.858	-2.216	-1.133	0.101	-1.443	-0.957	-1.007	-0.79
164592	-0.188	-0.116	0.254	-0.204	-0.133	-0.178	0.515	-0.803	-0.348	-0.338	-0.512	-0.174	-0.153	-0.115	0.685	0.105	0.212	-0.432	-0.65	-0.082	-0.383	0.024	0.08	0.499	0.285	0.412	-0.378	-0.404	0.045	0.521	0.214	-0.809	0.054	-0.2	0.638	-0.135	0.498	0.094	0.133	0.04	-0.587	0.59	-0.112	-0.112	0.285	0.205	-0.44	0.034	0.06
728875	-0.171	-0.218	0.492	-0.273	-0.038	-0.075	-0.155	0.044	0.225	-0.322	-0.048	0.302	0.478	0.012	0.065	-0.274	-0.113	0.093	0.028	-0.022	0.247	-0.045	0.011	-0.304	0.317	-0.249	-0.703	0.497	-0.36	-0.253	0.14	-0.284	-0.157	-0.712	0.092	0.083	-0.196	0.35	-0.287	0.864	0.075	-0.383	0.15	0.019	-0.006	-0.35	0.207	-0.088	0.191
117157	-0.887	-2.661	-0.921	-0.029	-1.945	0.649	-0.761	0.621	-0.888	0.606	-0.245	-1.77	-1.224	0.142	-2.471	-0.399	-1.912	-1.648	-2.232	1.346	0.986	-0.693	-1.276	-0.346	-0.34	-0.523	-1.29	-0.114	-1.206	-0.261	-1.795	-0.748	-0.483	0.037	-0.222	-0.784	1.121	-1.955	-0.912	-0.279	-0.41	-0.663	-1.685	0.156	-1.286	-0.892	0.13	-2.191	-1.123
55686	1.385	-0.727	0.586	1.4	0.761	-0.926	1.118	0.14	0.623	-0.431	-0.629	1.705	0.693	-0.7	-0.284	0.365	0.477	-1.535	0.857	-0.681	0.564	-1.393	0.222	1.694	-0.538	0.356	-0.688	-0.194	-0.162	0.151	-0.151	1.871	-0.266	0.712	0.575	0.403	0.353	-0.506	1.302	1.927	0.343	0.095	-1.38	1.074	-1.654	1.426	-0.992	-0.151	0.62
646119	-0.276	-0.103	-0.407	-0.506	0.591	-0.784	-0.046	-0.099	-0.328	0.261	-0.511	0.191	0.155	-0.123	1.037	-0.361	0.106	0.213	0.062	-0.185	-0.452	-0.111	0.095	-0.03	1.202	0.007	0.541	-0.563	0.084	0.172	0.319	-0.321	-0.007	-0.526	-0.507	-0.228	0.403	-0.068	-0.042	-0.054	0.173	2.819	0.922	-0.343	-0.358	-0.361	-0.943	-0.073	0.699
[truncated: 761 more rows]
[truncated: 1 more columns]

## Sheet: geneset_cor0.7.simu
gene	set.1	set.2	set.3	set.4	set.5	set.6	set.7	set.8	set.9	set.10	set.11	set.12	set.13	set.14	set.15	set.16	set.17	set.18	set.19	set.20	set.21	set.22	set.23	set.24	set.25	set.26	set.27	set.28	set.29	set.30	set.31	set.32	set.33	set.34	set.35	set.36	set.37	set.38	set.39	set.40	set.41	set.42	set.43	set.44	set.45	set.46	set.47	set.48	set.49
[truncated: 1,000 more rows]
[truncated: 171 more columns]

[truncated: 4 more sheets: geneset_cor0.8.simu, setpair.simu, result_cor0.7.simu, result_cor0.8.simu]
