# Supplementary material for: Inferring pathway crosstalk networks using gene set co-expression signatures
Source: Royal Society of Chemistry journal article supplement (doi:10.1039/c3mb25506a), 2013-03-21
Supplement: c3mb25506a_3.xlsx [file c3mb25506a_3.xlsx]

## Sheet: ttest_remaining_gene.HCC
gene	t-score	pvalue	fdr
10332	-40.7761	5.38e-62	1.62e-58
55576	-37.8546	4.19e-59	6.3e-56
51266	-37.3019	1.55e-58	1.56e-55
9547	-36.9997	3.2e-58	2.41e-55
8685	-36.6027	8.34e-58	4.35e-55
339390	-36.5728	8.97e-58	4.5e-55
168667	-35.9652	3.96e-57	1.7e-54
2220	-34.15	3.83e-55	1.38e-52
1621	-33.9949	5.71e-55	1.91e-52
170392	-33.0692	6.42e-54	1.93e-51
56000	-31.7875	2.02e-52	5.52e-50
8547	-31.2991	7.74e-52	1.94e-49
1393	-30.9944	1.81e-51	4.18e-49
6368	-30.635	4.95e-51	1.06e-48
7433	-30.3631	1.07e-50	2.07e-48
10584	-30.3153	1.22e-50	2.3e-48
5745	-30.1677	1.86e-50	3.3e-48
1893	-29.4317	1.56e-49	2.6e-47
2823	-28.7347	1.21e-48	1.84e-46
11318	-28.672	1.45e-48	2.17e-46
55143	28.4982	2.44e-48	3.36e-46
131873	-28.4334	2.96e-48	3.92e-46
64399	-28.4173	3.11e-48	4.07e-46
11093	-28.3521	3.78e-48	4.74e-46
5816	-28.0706	8.83e-48	1.06e-45
170685	-27.9511	1.27e-47	1.47e-45
54443	27.8521	1.71e-47	1.91e-45
147372	-27.7632	2.25e-47	2.42e-45
9227	-27.6373	3.3e-47	3.43e-45
4751	27.4021	6.79e-47	6.72e-45
3977	-27.3402	8.22e-47	7.99e-45
9833	27.2384	1.13e-46	1.06e-44
5199	-27.1052	1.7e-46	1.55e-44
11065	26.7969	4.46e-46	3.9e-44
7153	26.6973	6.09e-46	5.2e-44
259266	26.5959	8.39e-46	6.93e-44
113130	26.4757	1.23e-45	9.61e-44
9172	-26.4605	1.29e-45	1e-43
1033	26.4404	1.37e-45	1.05e-43
1063	26.4048	1.53e-45	1.16e-43
9055	26.2144	2.81e-45	2.03e-43
29089	26.1843	3.09e-45	2.22e-43
2305	25.9436	6.69e-45	4.65e-43
1058	25.8476	9.11e-45	6.21e-43
10164	-25.7767	1.14e-44	7.66e-43
55214	-25.6635	1.65e-44	1.08e-42
2658	-25.5294	2.55e-44	1.63e-42
83854	-25.4371	3.45e-44	2.16e-42
3161	25.3015	5.37e-44	3.23e-42
653	-25.2988	5.42e-44	3.26e-42
220134	25.2508	6.34e-44	3.74e-42
29127	25.1621	8.48e-44	4.84e-42
51316	-25.1512	8.79e-44	4.99e-42
143425	-25.0947	1.06e-43	5.91e-42
4908	-25.0048	1.42e-43	7.71e-42
9133	24.9399	1.77e-43	9.31e-42
10112	24.9106	1.95e-43	1.01e-41
146909	24.9081	1.96e-43	1.02e-41
332	24.7501	3.32e-43	1.67e-41
65010	24.7246	3.61e-43	1.81e-41
25891	-24.6719	4.3e-43	2.12e-41
84870	-24.4972	7.71e-43	3.74e-41
6915	-24.4167	1.01e-42	4.83e-41
9232	24.2286	1.91e-42	8.91e-41
9787	24.0943	3e-42	1.37e-40
83461	24.0719	3.24e-42	1.47e-40
995	24.0503	3.49e-42	1.57e-40
55872	23.9813	4.41e-42	1.95e-40
1949	-23.8317	7.35e-42	3.18e-40
116154	-23.8071	8e-42	3.44e-40
83540	23.6623	1.31e-41	5.52e-40
4684	-23.6372	1.43e-41	5.99e-40
387103	23.498	2.32e-41	9.47e-40
140876	-23.425	2.98e-41	1.2e-39
79722	-23.3776	3.51e-41	1.4e-39
54674	-23.3674	3.64e-41	1.44e-39
9630	-23.1859	6.84e-41	2.64e-39
399563	-23.1834	6.9e-41	2.66e-39
27115	-23.0143	1.25e-40	4.71e-39
64151	22.9935	1.34e-40	5.05e-39
891	22.9329	1.66e-40	6.17e-39
147841	22.7964	2.68e-40	9.75e-39
54511	-22.7912	2.73e-40	9.92e-39
55355	22.6841	3.99e-40	1.43e-38
221150	22.5569	6.27e-40	2.22e-38
577	-22.4143	1.04e-39	3.62e-38
1602	-22.3538	1.29e-39	4.44e-38
699	22.3457	1.33e-39	4.56e-38
51203	22.2445	1.91e-39	6.41e-38
10486	22.2387	1.95e-39	6.54e-38
4499	-22.1887	2.34e-39	7.74e-38
9156	22.1262	2.93e-39	9.53e-38
10894	-22.1112	3.09e-39	1e-37
7272	22.0654	3.65e-39	1.17e-37
390	-22.0392	4.01e-39	1.27e-37
9071	-21.864	7.56e-39	2.29e-37
79733	21.83	8.56e-39	2.56e-37
56924	21.8256	8.7e-39	2.59e-37
55600	-21.8212	8.84e-39	2.63e-37
7980	-21.788	9.97e-39	2.93e-37
1894	21.7839	1.01e-38	2.97e-37
24137	21.7684	1.07e-38	3.12e-37
6425	-21.747	1.16e-38	3.33e-37
701	21.7403	1.19e-38	3.4e-37
890	21.7393	1.19e-38	3.41e-37
84189	-21.6793	1.48e-38	4.17e-37
6241	21.6733	1.52e-38	4.26e-37
1071	-21.6313	1.77e-38	4.89e-37
9378	-21.6065	1.93e-38	5.3e-37
81610	21.6055	1.94e-38	5.31e-37
645745	-21.5143	2.71e-38	7.36e-37
400258	-21.3601	4.78e-38	1.28e-36
55010	21.3413	5.13e-38	1.36e-36
150468	21.2637	6.83e-38	1.79e-36
57405	21.2527	7.11e-38	1.86e-36
6491	21.2156	8.16e-38	2.12e-36
2146	21.1207	1.16e-37	2.97e-36
10403	21.1117	1.2e-37	3.06e-36
84620	-21.0054	1.78e-37	4.49e-36
6523	-20.9849	1.92e-37	4.83e-36
983	20.9447	2.24e-37	5.56e-36
11082	20.8736	2.92e-37	7.19e-36
83876	-20.8176	3.6e-37	8.8e-36
3833	20.7534	4.58e-37	1.11e-35
6790	20.7343	4.92e-37	1.18e-35
8406	-20.6932	5.74e-37	1.37e-35
4288	20.6694	6.28e-37	1.48e-35
9638	-20.6581	6.56e-37	1.54e-35
1951	20.6243	7.45e-37	1.74e-35
10712	20.5874	8.56e-37	1.98e-35
284618	20.5389	1.03e-36	2.35e-35
51514	20.5259	1.08e-36	2.46e-35
3832	20.512	1.14e-36	2.58e-35
63941	20.4049	1.71e-36	3.79e-35
54993	20.3955	1.77e-36	3.92e-35
10721	20.3576	2.05e-36	4.49e-35
4436	20.3566	2.05e-36	4.5e-35
28513	-20.3407	2.18e-36	4.76e-35
9319	20.2855	2.69e-36	5.82e-35
991	20.2183	3.48e-36	7.42e-35
219623	-20.2028	3.69e-36	7.85e-35
4498	-20.197	3.78e-36	8.01e-35
5577	-20.1478	4.56e-36	9.59e-35
140851	-20.1187	5.1e-36	1.07e-34
54908	20.0427	6.82e-36	1.4e-34
400550	-20.0329	7.08e-36	1.45e-34
90957	20.0042	7.91e-36	1.61e-34
55165	19.9982	8.09e-36	1.64e-34
30845	-19.9886	8.4e-36	1.7e-34
284013	-19.8935	1.21e-35	2.4e-34
2491	19.8809	1.27e-35	2.51e-34
81930	19.8758	1.3e-35	2.56e-34
11130	19.866	1.35e-35	2.65e-34
23397	19.8334	1.53e-35	2.99e-34
9348	-19.7921	1.79e-35	3.48e-34
200095	19.75	2.11e-35	4.07e-34
646576	-19.693	2.64e-35	5.01e-34
10635	19.669	2.89e-35	5.46e-34
11022	19.6639	2.95e-35	5.57e-34
10990	-19.6463	3.16e-35	5.93e-34
54892	19.6358	3.29e-35	6.16e-34
157313	19.5537	4.53e-35	8.37e-34
9768	19.5282	5.01e-35	9.2e-34
5888	19.4831	5.97e-35	1.09e-33
56992	19.4714	6.25e-35	1.13e-33
2224	19.4691	6.31e-35	1.14e-33
3781	-19.3853	8.76e-35	1.57e-33
10535	19.3555	9.84e-35	1.76e-33
151246	19.3366	1.06e-34	1.89e-33
23428	-19.232	1.6e-34	2.83e-33
22974	19.157	2.15e-34	3.77e-33
1062	19.1346	2.35e-34	4.1e-33
57817	-19.0812	2.9e-34	5.03e-33
9212	19.078	2.94e-34	5.09e-33
89822	-19.0168	3.75e-34	6.42e-33
4886	-18.9813	4.31e-34	7.34e-33
84057	18.9805	4.33e-34	7.36e-33
55723	18.9549	4.79e-34	8.1e-33
1776	-18.9307	5.27e-34	8.87e-33
114132	-18.8921	6.15e-34	1.03e-32
143941	-18.867	6.8e-34	1.13e-32
2015	-18.8606	6.97e-34	1.15e-32
84735	-18.8118	8.47e-34	1.39e-32
29951	-18.8084	8.58e-34	1.4e-32
9580	18.7736	9.87e-34	1.6e-32
79885	18.7545	1.06e-33	1.72e-32
84106	-18.7497	1.09e-33	1.75e-32
4496	-18.723	1.21e-33	1.93e-32
64651	-18.697	1.34e-33	2.13e-32
10024	18.6794	1.44e-33	2.27e-32
2213	-18.6632	1.54e-33	2.41e-32
1031	18.6555	1.58e-33	2.48e-32
51751	18.6387	1.69e-33	2.64e-32
26586	18.5817	2.13e-33	3.26e-32
151648	18.5753	2.18e-33	3.34e-32
59349	18.5623	2.3e-33	3.5e-32
29102	18.5409	2.51e-33	3.79e-32
219527	-18.5394	2.52e-33	3.81e-32
7203	18.5382	2.54e-33	3.82e-32
9493	18.523	2.7e-33	4.04e-32
5648	-18.5076	2.87e-33	4.27e-32
151	-18.4998	2.96e-33	4.39e-32
375444	18.4944	3.03e-33	4.47e-32
83483	18.4909	3.07e-33	4.53e-32
8318	18.4469	3.67e-33	5.37e-32
91057	18.4028	4.38e-33	6.35e-32
3483	-18.4005	4.42e-33	6.41e-32
9869	18.3625	5.16e-33	7.39e-32
57393	-18.3622	5.16e-33	7.4e-32
9928	18.3558	5.3e-33	7.58e-32
55215	18.3455	5.52e-33	7.88e-32
59277	-18.3125	6.31e-33	8.96e-32
4500	-18.2882	6.97e-33	9.85e-32
353514	-18.2378	8.55e-33	1.2e-31
4085	18.2037	9.82e-33	1.36e-31
146956	18.1894	1.04e-32	1.44e-31
5279	18.184	1.06e-32	1.47e-31
10293	18.1755	1.1e-32	1.52e-31
347240	18.17	1.13e-32	1.55e-31
6894	18.148	1.23e-32	1.68e-31
79623	-18.1425	1.26e-32	1.72e-31
5984	18.1124	1.42e-32	1.93e-31
10067	18.1089	1.44e-32	1.95e-31
389558	-18.0681	1.71e-32	2.28e-31
144455	18.0665	1.72e-32	2.29e-31
157570	18.06	1.76e-32	2.35e-31
728688	18.0412	1.91e-32	2.52e-31
63920	18.0246	2.04e-32	2.68e-31
6941	18.0222	2.06e-32	2.71e-31
54825	-18.0082	2.18e-32	2.85e-31
3486	-17.9923	2.33e-32	3.03e-31
113115	17.9892	2.36e-32	3.06e-31
51629	17.9784	2.46e-32	3.18e-31
9464	-17.9641	2.61e-32	3.36e-31
1805	-17.947	2.8e-32	3.59e-31
6387	-17.8845	3.62e-32	4.59e-31
6713	17.864	3.94e-32	4.97e-31
92293	-17.8604	4e-32	5.04e-31
3931	-17.7982	5.16e-32	6.42e-31
84515	17.7919	5.3e-32	6.57e-31
11012	-17.7853	5.45e-32	6.74e-31
5983	17.7812	5.54e-32	6.85e-31
1870	17.7682	5.85e-32	7.2e-31
256236	-17.7602	6.04e-32	7.42e-31
79696	-17.7591	6.07e-32	7.45e-31
112770	17.7408	6.54e-32	7.99e-31
91937	-17.7261	6.95e-32	8.44e-31
126382	17.7188	7.16e-32	8.68e-31
92369	-17.7102	7.42e-32	8.96e-31
10919	17.7042	7.61e-32	9.17e-31
6943	-17.67	8.77e-32	1.05e-30
54821	17.6385	9.98e-32	1.19e-30
3082	-17.6153	1.1e-31	1.31e-30
29940	-17.545	1.47e-31	1.74e-30
374393	17.5105	1.7e-31	2e-30
56944	-17.5047	1.74e-31	2.04e-30
5354	-17.4796	1.93e-31	2.26e-30
4804	-17.4525	2.16e-31	2.52e-30
920	-17.4083	2.6e-31	3e-30
3773	-17.3898	2.81e-31	3.23e-30
55734	17.3543	3.25e-31	3.72e-30
8074	-17.3531	3.27e-31	3.74e-30
169355	-17.3416	3.43e-31	3.91e-30
84701	17.3184	3.78e-31	4.28e-30
84631	-17.3097	3.92e-31	4.42e-30
10051	17.309	3.93e-31	4.44e-30
11185	-17.2996	4.09e-31	4.6e-30
9476	-17.2847	4.35e-31	4.87e-30
9793	17.2773	4.49e-31	5.01e-30
145270	-17.266	4.71e-31	5.23e-30
51744	-17.2634	4.76e-31	5.29e-30
27085	17.2445	5.15e-31	5.68e-30
79689	-17.2311	5.45e-31	5.98e-30
29901	17.226	5.57e-31	6.1e-30
55247	17.2247	5.6e-31	6.13e-30
3397	-17.2033	6.12e-31	6.68e-30
55388	17.1585	7.39e-31	8.01e-30
1544	-17.133	8.23e-31	8.88e-30
7123	-17.0899	9.86e-31	1.06e-29
947	17.0862	1e-30	1.07e-29
1201	17.0632	1.1e-30	1.17e-29
23080	17.0499	1.17e-30	1.24e-29
11339	17.0491	1.17e-30	1.24e-29
10036	17.0456	1.19e-30	1.26e-29
3680	-17.0339	1.25e-30	1.32e-29
10898	16.9966	1.46e-30	1.53e-29
64101	-16.9619	1.69e-30	1.76e-29
28982	16.9339	1.9e-30	1.98e-29
4494	-16.9112	2.1e-30	2.16e-29
81609	16.8983	2.21e-30	2.28e-29
3655	16.8833	2.36e-30	2.42e-29
79022	16.8761	2.43e-30	2.49e-29
84873	-16.8753	2.44e-30	2.5e-29
2563	16.8565	2.64e-30	2.69e-29
6878	16.8506	2.71e-30	2.75e-29
80031	-16.8445	2.78e-30	2.82e-29
7010	-16.8423	2.81e-30	2.84e-29
3838	16.8354	2.89e-30	2.92e-29
306	-16.8067	3.26e-30	3.28e-29
79035	16.7956	3.42e-30	3.43e-29
1869	16.7649	3.9e-30	3.88e-29
2357	-16.7625	3.94e-30	3.91e-29
3101	-16.7329	4.47e-30	4.4e-29
93594	16.7273	4.57e-30	4.5e-29
5787	-16.7129	4.86e-30	4.77e-29
5138	-16.7072	4.98e-30	4.88e-29
2629	16.7044	5.04e-30	4.93e-29
29803	16.7039	5.05e-30	4.94e-29
7538	-16.691	5.34e-30	5.2e-29
57161	-16.6809	5.57e-30	5.41e-29
84417	-16.6506	6.34e-30	6.12e-29
8697	16.6276	6.99e-30	6.72e-29
4192	16.6181	7.28e-30	6.98e-29
1789	16.6174	7.3e-30	7.01e-29
23660	16.585	8.39e-30	8.01e-29
1592	-16.5612	9.29e-30	8.83e-29
11073	16.5271	1.07e-29	1.02e-28
9173	-16.5202	1.11e-29	1.04e-28
1080	-16.4956	1.23e-29	1.15e-28
389677	16.4857	1.28e-29	1.2e-28
2710	-16.4728	1.36e-29	1.27e-28
8483	-16.4541	1.47e-29	1.37e-28
1012	16.4508	1.49e-29	1.38e-28
11027	-16.4332	1.61e-29	1.49e-28
124842	-16.4309	1.62e-29	1.5e-28
9920	-16.4237	1.67e-29	1.54e-28
55118	-16.4174	1.72e-29	1.58e-28
114897	-16.399	1.86e-29	1.7e-28
90780	16.3814	2.01e-29	1.83e-28
990	16.379	2.03e-29	1.85e-28
2354	-16.3746	2.07e-29	1.88e-28
552900	16.3666	2.14e-29	1.94e-28
64231	-16.3586	2.21e-29	2e-28
10554	16.349	2.31e-29	2.08e-28
2358	-16.3435	2.36e-29	2.12e-28
10253	-16.3012	2.83e-29	2.53e-28
8985	16.2598	3.39e-29	2.99e-28
83463	16.253	3.49e-29	3.07e-28
128239	16.2351	3.77e-29	3.3e-28
27303	-16.2334	3.8e-29	3.32e-28
29028	16.2316	3.83e-29	3.35e-28
55664	-16.2305	3.85e-29	3.36e-28
3598	-16.2254	3.93e-29	3.43e-28
65244	16.2252	3.93e-29	3.44e-28
79573	16.223	3.97e-29	3.47e-28
2027	-16.2085	4.23e-29	3.68e-28
2099	-16.1962	4.46e-29	3.87e-28
23272	16.1844	4.69e-29	4.06e-28
2713	-16.1687	5.02e-29	4.32e-28
2643	-16.1401	5.68e-29	4.85e-28
79658	-16.1374	5.75e-29	4.91e-28
5557	16.1371	5.76e-29	4.91e-28
160364	-16.1341	5.83e-29	4.97e-28
286826	16.1255	6.06e-29	5.15e-28
23381	16.114	6.36e-29	5.39e-28
7546	16.112	6.42e-29	5.43e-28
63979	16.091	7.03e-29	5.9e-28
79005	16.0904	7.05e-29	5.91e-28
79831	-16.0856	7.2e-29	6.03e-28
286133	-16.0797	7.39e-29	6.17e-28
374569	-16.076	7.51e-29	6.26e-28
80028	16.0584	8.1e-29	6.72e-28
113828	-16.0571	8.15e-29	6.75e-28
7060	16.0497	8.41e-29	6.95e-28
9340	-16.0359	8.93e-29	7.34e-28
283904	-16.0163	9.72e-29	7.93e-28
11341	-16.0141	9.82e-29	8e-28
2189	16.0094	1e-28	8.15e-28
9719	-16.0055	1.02e-28	8.27e-28
4616	-16.0049	1.02e-28	8.29e-28
5347	15.9976	1.05e-28	8.53e-28
5764	-15.991	1.09e-28	8.75e-28
6283	-15.9868	1.11e-28	8.89e-28
55821	-15.9771	1.15e-28	9.23e-28
55028	15.9748	1.16e-28	9.31e-28
4172	15.9732	1.17e-28	9.37e-28
5101	-15.9716	1.18e-28	9.43e-28
440957	15.9674	1.2e-28	9.58e-28
163786	15.9587	1.25e-28	9.92e-28
654	-15.9479	1.31e-28	1.04e-27
8382	-15.9356	1.38e-28	1.09e-27
645277	-15.9136	1.52e-28	1.2e-27
51053	15.9076	1.56e-28	1.23e-27
286151	15.9042	1.58e-28	1.24e-27
1910	-15.8738	1.81e-28	1.41e-27
64105	15.866	1.87e-28	1.45e-27
10150	-15.8606	1.92e-28	1.49e-27
84727	15.8392	2.1e-28	1.62e-27
94122	-15.8249	2.24e-28	1.72e-27
29950	-15.8228	2.26e-28	1.73e-27
3083	-15.8196	2.29e-28	1.76e-27
56892	-15.8166	2.32e-28	1.78e-27
8629	15.8018	2.48e-28	1.89e-27
55503	-15.7885	2.62e-28	1.99e-27
90381	15.7874	2.64e-28	2e-27
6358	-15.7829	2.69e-28	2.04e-27
1841	15.7746	2.79e-28	2.11e-27
2568	-15.7741	2.8e-28	2.11e-27
607	15.7727	2.81e-28	2.12e-27
27036	-15.758	3e-28	2.25e-27
26511	-15.7578	3e-28	2.25e-27
112	15.753	3.07e-28	2.29e-27
9918	15.747	3.15e-28	2.35e-27
84913	-15.7439	3.19e-28	2.38e-27
57082	15.7322	3.36e-28	2.49e-27
1111	15.7005	3.86e-28	2.84e-27
51166	-15.6994	3.88e-28	2.85e-27
5743	-15.6948	3.96e-28	2.91e-27
57134	-15.6876	4.08e-28	2.99e-27
2949	-15.6865	4.1e-28	3.01e-27
7099	-15.6819	4.19e-28	3.06e-27
84440	15.6802	4.22e-28	3.08e-27
2687	-15.6632	4.54e-28	3.3e-27
5498	15.652	4.77e-28	3.46e-27
10926	15.6496	4.82e-28	3.49e-27
9355	-15.6274	5.32e-28	3.82e-27
221504	15.6273	5.32e-28	3.82e-27
80308	15.6209	5.47e-28	3.92e-27
1969	-15.6202	5.49e-28	3.93e-27
5558	15.6176	5.55e-28	3.97e-27
79019	15.6175	5.56e-28	3.97e-27
4998	15.6118	5.7e-28	4.06e-27
5710	15.6044	5.89e-28	4.18e-27
84792	15.5977	6.06e-28	4.3e-27
91368	15.5966	6.09e-28	4.32e-27
9146	15.5827	6.47e-28	4.56e-27
5473	-15.5709	6.82e-28	4.78e-27
79801	15.5688	6.88e-28	4.82e-27
27163	-15.5569	7.25e-28	5.05e-27
56245	-15.555	7.31e-28	5.09e-27
23594	15.5547	7.32e-28	5.09e-27
140	-15.5528	7.38e-28	5.13e-27
92379	15.5508	7.45e-28	5.17e-27
9068	-15.5482	7.54e-28	5.22e-27
1029	15.5461	7.6e-28	5.26e-27
2110	-15.5417	7.75e-28	5.35e-27
55222	15.5324	8.08e-28	5.57e-27
35	-15.5214	8.48e-28	5.83e-27
8427	15.5029	9.2e-28	6.3e-27
25819	-15.4929	9.62e-28	6.57e-27
23544	-15.4884	9.81e-28	6.69e-27
51512	15.4766	1.03e-27	7.03e-27
3070	15.4752	1.04e-27	7.07e-27
55666	15.4364	1.23e-27	8.34e-27
4023	15.4013	1.44e-27	9.68e-27
26015	15.3853	1.55e-27	1.04e-26
54939	15.3759	1.61e-27	1.08e-26
128346	-15.364	1.7e-27	1.13e-26
10268	-15.3513	1.8e-27	1.19e-26
23111	-15.3492	1.82e-27	1.21e-26
9509	-15.3412	1.88e-27	1.25e-26
6462	-15.3211	2.06e-27	1.36e-26
122953	-15.3185	2.08e-27	1.37e-26
80317	15.317	2.09e-27	1.38e-26
729111	-15.3081	2.18e-27	1.43e-26
286128	15.3012	2.25e-27	1.47e-26
60686	15.2922	2.34e-27	1.53e-26
55257	15.2869	2.39e-27	1.56e-26
84734	-15.2847	2.42e-27	1.58e-26
1306	15.2819	2.45e-27	1.59e-26
5993	15.278	2.49e-27	1.62e-26
11326	-15.2774	2.5e-27	1.62e-26
2954	-15.27	2.58e-27	1.67e-26
388325	-15.257	2.73e-27	1.77e-26
9134	15.2564	2.74e-27	1.77e-26
4521	15.2459	2.87e-27	1.85e-26
90865	-15.243	2.91e-27	1.87e-26
9824	15.2385	2.96e-27	1.9e-26
196051	-15.2377	2.98e-27	1.91e-26
8625	15.2253	3.15e-27	2.01e-26
55695	15.2087	3.38e-27	2.15e-26
388730	15.2042	3.45e-27	2.19e-26
26024	15.2017	3.49e-27	2.21e-26
283600	-15.2011	3.5e-27	2.22e-26
5476	15.1998	3.52e-27	2.23e-26
83875	-15.1923	3.64e-27	2.3e-26
11269	-15.1881	3.71e-27	2.34e-26
27005	15.1868	3.73e-27	2.35e-26
132671	-15.1442	4.51e-27	2.82e-26
2237	15.1326	4.75e-27	2.96e-26
364	-15.1278	4.85e-27	3.02e-26
80174	15.1106	5.24e-27	3.25e-26
7056	-15.1052	5.37e-27	3.32e-26
6905	15.1052	5.37e-27	3.32e-26
23254	-15.0934	5.66e-27	3.49e-26
2294	-15.0871	5.82e-27	3.58e-26
8809	-15.0833	5.92e-27	3.64e-26
401068	15.0801	6e-27	3.69e-26
4758	15.0791	6.03e-27	3.71e-26
4171	15.0717	6.23e-27	3.82e-26
153020	-15.0682	6.33e-27	3.88e-26
140680	15.0654	6.41e-27	3.92e-26
4501	-15.0481	6.93e-27	4.22e-26
92342	15.0451	7.02e-27	4.27e-26
4889	-15.0427	7.09e-27	4.31e-26
125058	15.0284	7.56e-27	4.58e-26
10445	15.0278	7.58e-27	4.59e-26
29899	15.0254	7.67e-27	4.63e-26
414328	-15.0159	8e-27	4.82e-26
7083	14.9982	8.65e-27	5.19e-26
55789	14.9934	8.84e-27	5.3e-26
8546	14.9902	8.97e-27	5.37e-26
8835	-14.9742	9.64e-27	5.74e-26
58497	14.9675	9.93e-27	5.9e-26
79023	14.9668	9.96e-27	5.92e-26
645084	14.9631	1.01e-26	6.01e-26
84295	14.9582	1.04e-26	6.13e-26
388595	-14.9537	1.06e-26	6.25e-26
55732	14.9408	1.12e-26	6.59e-26
220930	14.9381	1.13e-26	6.66e-26
9955	-14.9296	1.18e-26	6.89e-26
9826	14.9248	1.2e-26	7.03e-26
80263	14.9225	1.21e-26	7.09e-26
898	14.9222	1.22e-26	7.1e-26
8013	-14.9176	1.24e-26	7.24e-26
2969	14.9169	1.25e-26	7.26e-26
10	-14.9154	1.25e-26	7.3e-26
84879	-14.9113	1.28e-26	7.42e-26
4018	-14.8939	1.38e-26	8e-26
11169	14.88	1.47e-26	8.49e-26
4061	-14.8589	1.62e-26	9.29e-26
90134	-14.852	1.67e-26	9.57e-26
54407	-14.8467	1.71e-26	9.79e-26
57088	-14.8347	1.8e-26	1.03e-25
286053	14.8309	1.83e-26	1.05e-25
345557	-14.8265	1.87e-26	1.07e-25
388695	14.8257	1.88e-26	1.07e-25
8443	14.8232	1.9e-26	1.08e-25
4058	-14.8103	2.01e-26	1.14e-25
246213	-14.8027	2.08e-26	1.18e-25
445	-14.7953	2.15e-26	1.22e-25
814	-14.795	2.15e-26	1.22e-25
11131	14.7842	2.26e-26	1.27e-25
9139	14.7834	2.27e-26	1.28e-25
64805	-14.7759	2.35e-26	1.32e-25
11311	14.7714	2.39e-26	1.34e-25
84529	14.7638	2.48e-26	1.39e-25
10038	14.7633	2.48e-26	1.39e-25
81691	14.7539	2.59e-26	1.45e-25
443	-14.7512	2.62e-26	1.46e-25
30	-14.7462	2.68e-26	1.49e-25
5858	-14.7307	2.88e-26	1.6e-25
8842	-14.6958	3.37e-26	1.85e-25
10733	14.6945	3.39e-26	1.86e-25
3766	-14.6831	3.56e-26	1.96e-25
401541	14.6782	3.64e-26	2e-25
64946	14.6682	3.81e-26	2.08e-25
55705	14.6614	3.93e-26	2.15e-25
6240	14.6548	4.05e-26	2.21e-25
79680	14.6546	4.05e-26	2.21e-25
80177	-14.6527	4.09e-26	2.23e-25
8682	14.6464	4.21e-26	2.29e-25
55585	14.6402	4.33e-26	2.35e-25
360023	14.6329	4.47e-26	2.42e-25
8564	-14.628	4.57e-26	2.47e-25
6422	-14.6259	4.62e-26	2.49e-25
285195	-14.6217	4.7e-26	2.54e-25
23414	-14.6185	4.77e-26	2.57e-25
731049	14.6093	4.98e-26	2.67e-25
414308	-14.6076	5.01e-26	2.69e-25
341640	-14.603	5.12e-26	2.74e-25
29097	14.6001	5.18e-26	2.78e-25
55166	14.5972	5.25e-26	2.81e-25
929	-14.5892	5.45e-26	2.91e-25
10552	14.5852	5.55e-26	2.96e-25
57111	-14.578	5.73e-26	3.05e-25
81620	14.5679	6e-26	3.18e-25
1163	14.562	6.16e-26	3.26e-25
128869	14.5573	6.29e-26	3.33e-25
9122	-14.5477	6.57e-26	3.46e-25
126661	14.5461	6.62e-26	3.49e-25
23165	14.5414	6.76e-26	3.56e-25
22889	14.5394	6.83e-26	3.59e-25
404201	-14.5262	7.24e-26	3.8e-25
55512	-14.5215	7.4e-26	3.88e-25
9510	-14.491	8.5e-26	4.43e-25
22915	-14.4889	8.58e-26	4.47e-25
10666	-14.4794	8.96e-26	4.66e-25
6839	14.455	1e-25	5.19e-25
5111	14.4511	1.02e-25	5.27e-25
80304	14.4495	1.03e-25	5.31e-25
1827	-14.4441	1.05e-25	5.44e-25
11004	14.4375	1.08e-25	5.6e-25
145389	14.4108	1.22e-25	6.28e-25
285736	-14.3886	1.35e-25	6.92e-25
7283	14.3814	1.4e-25	7.14e-25
54535	14.3644	1.51e-25	7.68e-25
253714	14.3644	1.51e-25	7.68e-25
3726	-14.3596	1.54e-25	7.84e-25
57484	-14.3442	1.66e-25	8.37e-25
55656	14.3412	1.68e-25	8.48e-25
863	-14.3405	1.68e-25	8.5e-25
55337	-14.336	1.72e-25	8.67e-25
79682	14.3359	1.72e-25	8.67e-25
144406	-14.3343	1.73e-25	8.73e-25
1939	14.3328	1.74e-25	8.78e-25
57819	14.3308	1.76e-25	8.86e-25
4588	-14.3303	1.76e-25	8.88e-25
5239	-14.3262	1.8e-25	9.04e-25
1945	14.313	1.91e-25	9.56e-25
387763	-14.3108	1.93e-25	9.65e-25
558	-14.3089	1.94e-25	9.73e-25
25962	14.3021	2.01e-25	1e-24
3654	14.2907	2.11e-25	1.05e-24
6944	14.2855	2.16e-25	1.08e-24
220042	14.2629	2.4e-25	1.18e-24
56893	14.2585	2.45e-25	1.21e-24
2353	-14.2523	2.52e-25	1.24e-24
9677	14.2514	2.53e-25	1.24e-24
57592	14.2478	2.57e-25	1.26e-24
8805	14.2447	2.61e-25	1.28e-24
642946	14.2419	2.64e-25	1.29e-24
10262	14.2406	2.66e-25	1.3e-24
3394	-14.235	2.72e-25	1.33e-24
57648	14.2315	2.77e-25	1.35e-24
91694	-14.2303	2.78e-25	1.36e-24
285313	-14.2285	2.81e-25	1.37e-24
84905	14.2211	2.9e-25	1.41e-24
60675	-14.2141	3e-25	1.46e-24
9332	-14.2126	3.02e-25	1.46e-24
9557	14.208	3.08e-25	1.49e-24
55966	-14.2047	3.13e-25	1.51e-24
79075	14.1907	3.34e-25	1.61e-24
84262	14.1845	3.43e-25	1.65e-24
10439	-14.1787	3.52e-25	1.69e-24
22796	14.1774	3.54e-25	1.7e-24
85480	-14.1625	3.79e-25	1.82e-24
51603	14.1536	3.95e-25	1.89e-24
922	-14.139	4.22e-25	2.01e-24
503639	14.1363	4.28e-25	2.04e-24
5877	14.1291	4.42e-25	2.1e-24
53829	-14.1281	4.44e-25	2.11e-24
285016	-14.1273	4.46e-25	2.12e-24
53588	14.1263	4.48e-25	2.12e-24
55157	14.1227	4.55e-25	2.16e-24
8858	-14.1181	4.65e-25	2.2e-24
200810	14.1028	4.99e-25	2.35e-24
339229	14.0979	5.1e-25	2.4e-24
1378	-14.093	5.21e-25	2.45e-24
65265	14.0919	5.24e-25	2.46e-24
149603	14.0847	5.42e-25	2.54e-24
11264	14.0835	5.45e-25	2.55e-24
7936	14.0792	5.55e-25	2.6e-24
78989	-14.0749	5.67e-25	2.64e-24
4093	-14.0722	5.74e-25	2.67e-24
9735	14.0689	5.82e-25	2.71e-24
4170	-14.0606	6.05e-25	2.81e-24
4210	-14.0591	6.09e-25	2.83e-24
23367	14.059	6.09e-25	2.83e-24
23569	-14.0569	6.15e-25	2.85e-24
201299	14.0424	6.58e-25	3.03e-24
10228	14.0418	6.6e-25	3.04e-24
202347	14.037	6.74e-25	3.1e-24
54102	-14.0363	6.76e-25	3.11e-24
389834	14.0306	6.94e-25	3.19e-24
4489	-14.0273	7.05e-25	3.24e-24
55502	14.0166	7.4e-25	3.39e-24
4176	14.0154	7.45e-25	3.41e-24
120227	14.0029	7.88e-25	3.6e-24
29980	13.9841	8.59e-25	3.9e-24
11314	-13.9783	8.83e-25	4e-24
54460	13.9755	8.94e-25	4.05e-24
57633	-13.9697	9.19e-25	4.15e-24
201799	-13.9637	9.44e-25	4.26e-24
79977	-13.9587	9.66e-25	4.35e-24
150372	-13.9572	9.73e-25	4.38e-24
1645	13.9534	9.9e-25	4.45e-24
912	-13.9469	1.02e-24	4.58e-24
9831	13.9459	1.02e-24	4.6e-24
81559	13.9395	1.06e-24	4.73e-24
8270	13.9389	1.06e-24	4.74e-24
51434	13.938	1.06e-24	4.76e-24
10621	13.9336	1.08e-24	4.85e-24
5525	13.929	1.11e-24	4.94e-24
84300	13.9271	1.12e-24	4.98e-24
9025	13.9208	1.15e-24	5.12e-24
4931	13.9136	1.19e-24	5.28e-24
256691	-13.9032	1.25e-24	5.53e-24
27180	-13.8984	1.28e-24	5.64e-24
56672	13.8936	1.3e-24	5.76e-24
4329	-13.8923	1.31e-24	5.79e-24
79020	13.8916	1.32e-24	5.81e-24
9631	13.8818	1.38e-24	6.06e-24
23354	13.8541	1.56e-24	6.84e-24
37	-13.8511	1.59e-24	6.94e-24
221749	-13.8486	1.6e-24	7.01e-24
85453	-13.8481	1.61e-24	7.03e-24
10951	13.848	1.61e-24	7.03e-24
25936	13.8475	1.61e-24	7.04e-24
9862	13.7973	2.03e-24	8.82e-24
57689	-13.7939	2.06e-24	8.95e-24
161247	-13.7815	2.19e-24	9.46e-24
3556	-13.777	2.23e-24	9.65e-24
1174	13.7717	2.29e-24	9.88e-24
283420	-13.7669	2.34e-24	1.01e-23
55154	13.7545	2.48e-24	1.07e-23
8733	13.7494	2.54e-24	1.09e-23
79595	13.747	2.56e-24	1.1e-23
126375	13.7368	2.69e-24	1.15e-23
4239	-13.7355	2.7e-24	1.16e-23
57505	13.7238	2.85e-24	1.22e-23
6614	-13.7135	2.99e-24	1.28e-23
10615	13.7135	2.99e-24	1.28e-23
137209	13.7111	3.03e-24	1.29e-23
8458	13.7081	3.07e-24	1.31e-23
26574	13.7043	3.12e-24	1.33e-23
10643	13.6954	3.25e-24	1.38e-23
5805	-13.6942	3.27e-24	1.39e-23
57002	13.677	3.54e-24	1.5e-23
2920	-13.6655	3.74e-24	1.58e-23
284598	-13.6648	3.75e-24	1.58e-23
9079	-13.6635	3.77e-24	1.59e-23
2395	-13.6594	3.85e-24	1.62e-23
5346	-13.6582	3.87e-24	1.63e-23
8352	13.6556	3.91e-24	1.65e-23
84904	13.6493	4.03e-24	1.69e-23
131669	-13.6455	4.1e-24	1.72e-23
28511	13.6442	4.12e-24	1.73e-23
220441	-13.6374	4.26e-24	1.78e-23
57674	13.6368	4.27e-24	1.78e-23
78998	13.6337	4.33e-24	1.81e-23
6405	13.6221	4.57e-24	1.9e-23
51605	13.6202	4.61e-24	1.92e-23
5424	13.611	4.81e-24	2e-23
57447	-13.597	5.13e-24	2.13e-23
83985	13.5963	5.15e-24	2.13e-23
4482	-13.5936	5.22e-24	2.16e-23
401081	-13.5854	5.42e-24	2.24e-23
160622	-13.5745	5.7e-24	2.35e-23
1668	-13.5744	5.7e-24	2.35e-23
5528	13.5741	5.71e-24	2.35e-23
123	-13.5714	5.78e-24	2.38e-23
405754	-13.5676	5.88e-24	2.42e-23
5440	13.5569	6.18e-24	2.53e-23
1376	-13.5521	6.32e-24	2.59e-23
993	13.5442	6.56e-24	2.68e-23
3824	-13.5438	6.57e-24	2.68e-23
1958	-13.5289	7.04e-24	2.86e-23
80146	13.5282	7.07e-24	2.87e-23
51660	-13.5279	7.08e-24	2.87e-23
5739	-13.5272	7.1e-24	2.88e-23
81565	-13.5263	7.13e-24	2.89e-23
64149	13.5261	7.14e-24	2.89e-23
10957	-13.5182	7.4e-24	3e-23
2194	13.4994	8.08e-24	3.26e-23
9401	13.4898	8.45e-24	3.4e-23
118429	-13.4874	8.54e-24	3.43e-23
6615	-13.4865	8.58e-24	3.45e-23
1230	-13.4864	8.58e-24	3.45e-23
2918	-13.484	8.68e-24	3.49e-23
55746	13.4736	9.11e-24	3.65e-23
1514	-13.4451	1.04e-23	4.15e-23
11234	-13.4355	1.09e-23	4.33e-23
9077	-13.4303	1.11e-23	4.43e-23
10449	-13.4265	1.13e-23	4.5e-23
10460	13.41	1.23e-23	4.85e-23
11266	13.4054	1.25e-23	4.94e-23
8293	13.405	1.25e-23	4.95e-23
64078	-13.4047	1.26e-23	4.96e-23
148398	-13.4018	1.27e-23	5.02e-23
5156	-13.4	1.28e-23	5.06e-23
8477	-13.3959	1.31e-23	5.15e-23
79102	13.3828	1.39e-23	5.46e-23
124583	13.3804	1.41e-23	5.52e-23
286103	13.3775	1.43e-23	5.59e-23
648603	-13.3725	1.46e-23	5.72e-23
414235	-13.3707	1.47e-23	5.76e-23
5591	13.3696	1.48e-23	5.79e-23
115677	-13.3693	1.48e-23	5.79e-23
3039	-13.3653	1.51e-23	5.9e-23
7472	-13.3588	1.56e-23	6.07e-23
51302	-13.357	1.57e-23	6.11e-23
5955	13.3507	1.62e-23	6.28e-23
55249	13.3506	1.62e-23	6.29e-23
3491	-13.3405	1.69e-23	6.57e-23
288	-13.3396	1.7e-23	6.6e-23
23203	-13.3343	1.74e-23	6.75e-23
84450	13.3284	1.79e-23	6.93e-23
2058	13.3108	1.95e-23	7.48e-23
84869	-13.308	1.97e-23	7.57e-23
3818	-13.2988	2.06e-23	7.88e-23
340526	-13.2952	2.09e-23	8e-23
669	13.2925	2.12e-23	8.09e-23
169611	13.292	2.12e-23	8.11e-23
2218	13.2913	2.13e-23	8.14e-23
221300	-13.2902	2.14e-23	8.18e-23
9887	13.2885	2.16e-23	8.23e-23
7113	-13.2823	2.22e-23	8.46e-23
220107	-13.2806	2.24e-23	8.52e-23
3084	-13.2787	2.26e-23	8.59e-23
51256	13.2772	2.28e-23	8.64e-23
9270	13.2751	2.3e-23	8.72e-23
25886	13.2749	2.3e-23	8.73e-23
84933	13.2749	2.3e-23	8.73e-23
11267	13.2689	2.37e-23	8.96e-23
2057	-13.2635	2.43e-23	9.17e-23
7481	-13.2633	2.43e-23	9.17e-23
401022	13.2533	2.55e-23	9.58e-23
79169	13.2521	2.56e-23	9.63e-23
54437	13.2499	2.59e-23	9.72e-23
8914	13.2497	2.59e-23	9.73e-23
3512	-13.2417	2.69e-23	1.01e-22
2824	-13.2404	2.7e-23	1.01e-22
4615	-13.235	2.77e-23	1.04e-22
23513	13.2347	2.78e-23	1.04e-22
54520	13.2327	2.8e-23	1.05e-22
79137	13.2287	2.86e-23	1.06e-22
81858	13.2271	2.88e-23	1.07e-22
57650	13.2248	2.91e-23	1.08e-22
64754	13.2245	2.91e-23	1.08e-22
51520	13.2216	2.95e-23	1.1e-22
60509	13.2202	2.97e-23	1.1e-22
5546	13.2153	3.04e-23	1.13e-22
440184	-13.2147	3.05e-23	1.13e-22
144571	-13.2086	3.14e-23	1.16e-22
64326	13.2063	3.17e-23	1.17e-22
80178	13.1987	3.29e-23	1.21e-22
5126	-13.1933	3.37e-23	1.24e-22
64858	13.1761	3.66e-23	1.34e-22
90075	13.1752	3.67e-23	1.35e-22
2114	-13.1699	3.76e-23	1.38e-22
11052	13.165	3.85e-23	1.41e-22
81579	-13.1629	3.89e-23	1.42e-22
84079	13.161	3.92e-23	1.43e-22
113763	13.1565	4.01e-23	1.46e-22
203259	13.1524	4.08e-23	1.49e-22
84722	13.1509	4.11e-23	1.5e-22
7752	13.138	4.37e-23	1.59e-22
1379	-13.138	4.37e-23	1.59e-22
5153	-13.128	4.58e-23	1.66e-22
10859	-13.1232	4.68e-23	1.7e-22
283345	13.1225	4.7e-23	1.7e-22
51196	13.1186	4.79e-23	1.73e-22
55839	13.1105	4.97e-23	1.79e-22
25903	13.1088	5.01e-23	1.81e-22
78990	13.0972	5.29e-23	1.9e-22
80851	13.0922	5.42e-23	1.95e-22
148	-13.0901	5.47e-23	1.96e-22
80010	13.0866	5.56e-23	1.99e-22
200765	13.0852	5.6e-23	2.01e-22
653145	-13.077	5.82e-23	2.08e-22
47	13.062	6.24e-23	2.22e-22
8833	13.0613	6.26e-23	2.23e-22
23729	-13.0602	6.29e-23	2.24e-22
4605	13.0554	6.44e-23	2.29e-22
93643	13.0508	6.58e-23	2.34e-22
9761	13.0491	6.63e-23	2.35e-22
23144	13.0404	6.91e-23	2.44e-22
6626	13.0395	6.94e-23	2.45e-22
11181	-13.0392	6.95e-23	2.46e-22
51175	-13.0322	7.18e-23	2.53e-22
4493	-13.032	7.19e-23	2.54e-22
113174	13.0289	7.29e-23	2.57e-22
401251	13.0269	7.36e-23	2.59e-22
7727	13.0264	7.38e-23	2.6e-22
2649	13.0209	7.57e-23	2.66e-22
7840	13.0207	7.58e-23	2.66e-22
348995	13.0157	7.76e-23	2.72e-22
9936	-13.0133	7.85e-23	2.75e-22
26750	13.0079	8.05e-23	2.82e-22
55609	13.0056	8.14e-23	2.85e-22
83591	12.9968	8.48e-23	2.96e-22
137797	-12.9963	8.5e-23	2.96e-22
84320	12.9958	8.52e-23	2.97e-22
5911	12.9829	9.06e-23	3.15e-22
147381	-12.9792	9.21e-23	3.2e-22
55204	12.9787	9.24e-23	3.21e-22
10564	12.9688	9.68e-23	3.35e-22
4201	12.967	9.76e-23	3.38e-22
84928	12.9658	9.82e-23	3.4e-22
64748	12.9569	1.02e-22	3.53e-22
2534	-12.9545	1.04e-22	3.57e-22
284541	-12.9445	1.09e-22	3.73e-22
319	-12.9435	1.09e-22	3.75e-22
120863	12.9372	1.12e-22	3.85e-22
22994	12.9365	1.13e-22	3.86e-22
55174	-12.9354	1.13e-22	3.88e-22
6605	12.9337	1.14e-22	3.91e-22
10138	-12.9328	1.15e-22	3.93e-22
2260	-12.9274	1.18e-22	4.02e-22
55755	12.9215	1.21e-22	4.13e-22
6916	-12.9143	1.25e-22	4.27e-22
24149	12.9135	1.26e-22	4.28e-22
23710	-12.8974	1.35e-22	4.6e-22
9540	12.8962	1.36e-22	4.63e-22
23166	-12.8941	1.38e-22	4.67e-22
84296	12.8785	1.48e-22	5.01e-22
83990	12.8697	1.54e-22	5.21e-22
80704	-12.8689	1.55e-22	5.23e-22
83643	-12.8652	1.58e-22	5.32e-22
201232	-12.8576	1.63e-22	5.5e-22
5915	-12.8569	1.64e-22	5.52e-22
84318	12.8552	1.65e-22	5.56e-22
4783	-12.8549	1.66e-22	5.57e-22
80380	-12.8531	1.67e-22	5.61e-22
22996	12.8506	1.69e-22	5.68e-22
80311	-12.845	1.73e-22	5.82e-22
4047	12.844	1.74e-22	5.84e-22
79968	12.8362	1.81e-22	6.05e-22
23512	12.8346	1.82e-22	6.09e-22
80765	-12.8319	1.85e-22	6.17e-22
155400	12.8265	1.89e-22	6.32e-22
10473	12.8079	2.07e-22	6.87e-22
9611	-12.7992	2.15e-22	7.15e-22
387742	-12.7964	2.18e-22	7.24e-22
10401	12.7958	2.19e-22	7.26e-22
146050	12.7866	2.29e-22	7.56e-22
3159	12.7814	2.34e-22	7.74e-22
54946	12.7805	2.35e-22	7.77e-22
8677	12.7737	2.43e-22	8.02e-22
5271	-12.7731	2.44e-22	8.04e-22
6716	-12.7675	2.5e-22	8.24e-22
26262	12.7668	2.51e-22	8.26e-22
4798	12.7571	2.63e-22	8.63e-22
23225	12.7566	2.63e-22	8.65e-22
79742	12.7539	2.67e-22	8.75e-22
5272	-12.752	2.69e-22	8.83e-22
8496	-12.7476	2.75e-22	9e-22
1902	-12.7448	2.79e-22	9.12e-22
80153	12.7433	2.81e-22	9.18e-22
2040	-12.7395	2.86e-22	9.33e-22
64417	12.7353	2.91e-22	9.51e-22
147	-12.7269	3.03e-22	9.87e-22
7102	-12.721	3.12e-22	1.01e-21
644656	12.7138	3.23e-22	1.05e-21
84221	12.7107	3.27e-22	1.06e-21
55647	-12.7071	3.33e-22	1.08e-21
6665	-12.7061	3.35e-22	1.08e-21
64762	-12.7052	3.36e-22	1.09e-21
10427	-12.7051	3.36e-22	1.09e-21
269	-12.7033	3.39e-22	1.09e-21
2619	-12.7007	3.43e-22	1.11e-21
84260	12.7001	3.44e-22	1.11e-21
123879	-12.696	3.51e-22	1.13e-21
5520	-12.6958	3.51e-22	1.13e-21
9477	12.6925	3.57e-22	1.15e-21
11199	-12.6883	3.64e-22	1.17e-21
2639	-12.6871	3.66e-22	1.18e-21
22995	12.6802	3.78e-22	1.21e-21
84883	12.6776	3.83e-22	1.23e-21
55747	12.6764	3.85e-22	1.23e-21
89231	12.6572	4.22e-22	1.34e-21
1847	-12.6535	4.29e-22	1.37e-21
55038	12.6527	4.31e-22	1.37e-21
2719	12.6519	4.33e-22	1.38e-21
78995	12.6499	4.37e-22	1.39e-21
1634	-12.6494	4.38e-22	1.39e-21
7443	12.6436	4.5e-22	1.43e-21
10395	-12.6412	4.55e-22	1.44e-21
389012	12.6387	4.6e-22	1.46e-21
285580	12.6336	4.72e-22	1.49e-21
375690	12.6316	4.76e-22	1.51e-21
2066	-12.6311	4.77e-22	1.51e-21
185	-12.6275	4.85e-22	1.53e-21
23417	-12.6239	4.94e-22	1.56e-21
7062	-12.6146	5.16e-22	1.62e-21
8438	12.6064	5.37e-22	1.68e-21
5565	12.6033	5.45e-22	1.71e-21
2214	-12.6021	5.48e-22	1.72e-21
152330	-12.6012	5.5e-22	1.72e-21
79175	12.5963	5.63e-22	1.76e-21
441168	-12.5927	5.73e-22	1.79e-21
11024	-12.5909	5.78e-22	1.8e-21
51011	-12.586	5.91e-22	1.84e-21
23766	-12.5815	6.04e-22	1.88e-21
83596	12.5779	6.15e-22	1.91e-21
203427	12.5768	6.18e-22	1.92e-21
63905	12.5758	6.21e-22	1.93e-21
55156	12.5714	6.34e-22	1.96e-21
56970	12.5704	6.37e-22	1.97e-21
23623	12.57	6.38e-22	1.98e-21
5655	-12.5696	6.39e-22	1.98e-21
54932	12.5676	6.45e-22	2e-21
64786	-12.5655	6.52e-22	2.02e-21
2177	12.5614	6.64e-22	2.05e-21
10466	12.5577	6.76e-22	2.08e-21
2160	-12.555	6.85e-22	2.11e-21
3580	-12.5512	6.97e-22	2.14e-21
7371	12.5477	7.09e-22	2.18e-21
80000	12.5476	7.09e-22	2.18e-21
3507	-12.5431	7.25e-22	2.22e-21
5547	-12.5423	7.28e-22	2.23e-21
9343	12.539	7.39e-22	2.26e-21
388962	12.5365	7.48e-22	2.29e-21
79966	-12.5358	7.5e-22	2.29e-21
643616	-12.528	7.79e-22	2.37e-21
5810	12.5255	7.88e-22	2.4e-21
4173	12.5248	7.91e-22	2.4e-21
2104	-12.5229	7.98e-22	2.42e-21
23054	12.5214	8.04e-22	2.44e-21
5422	12.5211	8.05e-22	2.44e-21
642340	-12.5197	8.1e-22	2.46e-21
23421	12.5195	8.11e-22	2.46e-21
90462	12.5164	8.23e-22	2.49e-21
84336	12.5134	8.35e-22	2.53e-21
3315	12.4986	8.96e-22	2.7e-21
6296	-12.4967	9.04e-22	2.73e-21
79915	12.4957	9.08e-22	2.74e-21
79905	12.4906	9.3e-22	2.8e-21
57188	-12.4898	9.34e-22	2.81e-21
2065	12.483	9.65e-22	2.9e-21
4651	-12.4801	9.78e-22	2.94e-21
54868	12.47	1.03e-21	3.07e-21
346887	-12.4678	1.04e-21	3.11e-21
5957	-12.4653	1.05e-21	3.14e-21
5296	12.4582	1.09e-21	3.24e-21
9400	12.4536	1.11e-21	3.31e-21
5924	12.4501	1.13e-21	3.36e-21
2306	12.4483	1.14e-21	3.39e-21
94239	12.4427	1.17e-21	3.48e-21
9590	-12.4412	1.18e-21	3.5e-21
8370	12.4383	1.19e-21	3.55e-21
528	12.4374	1.2e-21	3.56e-21
6403	-12.4364	1.2e-21	3.58e-21
25878	-12.4292	1.25e-21	3.69e-21
23236	12.4272	1.26e-21	3.73e-21
63874	12.4254	1.27e-21	3.76e-21
3880	-12.4182	1.31e-21	3.88e-21
10212	12.4127	1.35e-21	3.97e-21
60626	12.4107	1.36e-21	4.01e-21
51222	12.4106	1.36e-21	4.01e-21
4439	12.4069	1.39e-21	4.08e-21
84930	12.4059	1.39e-21	4.09e-21
1852	12.4058	1.39e-21	4.1e-21
28234	-12.3981	1.45e-21	4.24e-21
51348	-12.3925	1.48e-21	4.35e-21
51279	-12.3914	1.49e-21	4.37e-21
2022	-12.3896	1.51e-21	4.41e-21
7515	12.3875	1.52e-21	4.45e-21
115330	-12.3855	1.53e-21	4.49e-21
55833	12.3787	1.59e-21	4.63e-21
137835	-12.3754	1.61e-21	4.7e-21
8530	-12.364	1.7e-21	4.95e-21
23551	12.3529	1.79e-21	5.21e-21
54094	-12.3498	1.82e-21	5.28e-21
79980	12.3423	1.89e-21	5.46e-21
10057	12.3303	2e-21	5.77e-21
1464	12.3288	2.01e-21	5.81e-21
26205	12.3275	2.02e-21	5.84e-21
9501	-12.3274	2.02e-21	5.85e-21
23150	-12.324	2.06e-21	5.94e-21
6348	-12.3171	2.13e-21	6.13e-21
51654	12.311	2.19e-21	6.3e-21
55071	12.3102	2.2e-21	6.32e-21
7067	12.308	2.22e-21	6.38e-21
9019	12.2967	2.34e-21	6.72e-21
10400	-12.294	2.37e-21	6.8e-21
92312	12.2865	2.46e-21	7.03e-21
3454	-12.2803	2.54e-21	7.23e-21
90417	12.28	2.54e-21	7.24e-21
29937	12.277	2.58e-21	7.34e-21
55835	12.2738	2.61e-21	7.44e-21
57332	12.2664	2.71e-21	7.7e-21
8799	12.256	2.85e-21	8.06e-21
400709	-12.2503	2.93e-21	8.27e-21
124975	-12.2483	2.95e-21	8.34e-21
2152	-12.2467	2.98e-21	8.4e-21
27141	-12.2438	3.02e-21	8.51e-21
1675	-12.2424	3.04e-21	8.57e-21
353174	12.2421	3.04e-21	8.57e-21
1025	-12.2391	3.09e-21	8.69e-21
5359	-12.2388	3.09e-21	8.7e-21
6913	-12.2371	3.12e-21	8.77e-21
59350	-12.2347	3.15e-21	8.86e-21
201725	12.234	3.16e-21	8.89e-21
6416	-12.2322	3.19e-21	8.96e-21
23179	-12.2302	3.22e-21	9.04e-21
2875	-12.2292	3.24e-21	9.08e-21
8631	-12.2275	3.26e-21	9.15e-21
283377	-12.2215	3.36e-21	9.39e-21
8317	12.2215	3.36e-21	9.39e-21
64785	12.2207	3.37e-21	9.43e-21
642477	12.2168	3.43e-21	9.59e-21
2157	-12.2155	3.45e-21	9.64e-21
285440	-12.2134	3.49e-21	9.73e-21
9203	12.2087	3.57e-21	9.94e-21
10963	12.2024	3.68e-21	1.02e-20
728568	12.201	3.7e-21	1.03e-20
326343	-12.1992	3.74e-21	1.04e-20
79845	-12.1989	3.74e-21	1.04e-20
121599	-12.1982	3.75e-21	1.04e-20
57048	-12.1952	3.81e-21	1.05e-20
151313	-12.1923	3.86e-21	1.07e-20
57504	12.1894	3.91e-21	1.08e-20
9897	12.1892	3.92e-21	1.08e-20
337	-12.1882	3.94e-21	1.09e-20
64132	12.1881	3.94e-21	1.09e-20
660	-12.1876	3.95e-21	1.09e-20
7049	-12.1875	3.95e-21	1.09e-20
51594	12.183	4.04e-21	1.11e-20
137886	12.1814	4.07e-21	1.12e-20
10055	12.1789	4.12e-21	1.13e-20
3503	-12.1785	4.12e-21	1.13e-20
55771	12.1756	4.18e-21	1.15e-20
3399	-12.1755	4.18e-21	1.15e-20
554235	-12.1709	4.28e-21	1.17e-20
10875	-12.1686	4.33e-21	1.18e-20
219595	-12.1643	4.42e-21	1.21e-20
5604	-12.1629	4.44e-21	1.21e-20
91433	12.1626	4.45e-21	1.21e-20
270	-12.1625	4.45e-21	1.21e-20
157680	12.1604	4.5e-21	1.23e-20
652995	-12.1591	4.53e-21	1.23e-20
284161	12.1586	4.54e-21	1.23e-20
340351	12.158	4.55e-21	1.24e-20
80179	12.1576	4.56e-21	1.24e-20
3681	-12.1575	4.56e-21	1.24e-20
64359	-12.1556	4.6e-21	1.25e-20
54823	12.1521	4.68e-21	1.27e-20
387775	-12.1484	4.76e-21	1.29e-20
27297	-12.1476	4.78e-21	1.3e-20
54981	-12.1461	4.82e-21	1.3e-20
28231	-12.1429	4.89e-21	1.32e-20
5594	12.1294	5.22e-21	1.41e-20
84288	12.1277	5.26e-21	1.42e-20
84614	12.1191	5.48e-21	1.47e-20
682	12.1185	5.5e-21	1.48e-20
51027	12.1167	5.55e-21	1.49e-20
6351	-12.1149	5.59e-21	1.5e-20
84129	-12.1075	5.8e-21	1.55e-20
57187	12.1001	6e-21	1.61e-20
715	-12.0997	6.02e-21	1.61e-20
90987	12.0986	6.05e-21	1.62e-20
594	-12.0982	6.06e-21	1.62e-20
166785	-12.0981	6.06e-21	1.62e-20
10616	12.0974	6.08e-21	1.63e-20
283871	12.0948	6.16e-21	1.64e-20
221477	12.0905	6.29e-21	1.68e-20
5635	12.0899	6.31e-21	1.68e-20
57623	12.0862	6.42e-21	1.71e-20
5799	-12.083	6.52e-21	1.74e-20
55740	12.0709	6.91e-21	1.83e-20
94120	-12.0683	6.99e-21	1.85e-20
80054	12.0675	7.02e-21	1.86e-20
284403	12.0674	7.02e-21	1.86e-20
7074	-12.0665	7.05e-21	1.87e-20
55957	12.0654	7.09e-21	1.88e-20
9839	-12.0607	7.25e-21	1.92e-20
50999	-12.0596	7.29e-21	1.93e-20
128240	12.0552	7.45e-21	1.97e-20
4916	-12.0547	7.47e-21	1.97e-20
5420	12.052	7.56e-21	1.99e-20
116841	12.0438	7.87e-21	2.07e-20
286077	12.0433	7.89e-21	2.07e-20
730	-12.0366	8.14e-21	2.14e-20
144165	-12.0348	8.21e-21	2.16e-20
55823	12.0322	8.31e-21	2.18e-20
8703	12.0315	8.34e-21	2.19e-20
9703	12.0271	8.52e-21	2.23e-20
8396	12.0243	8.64e-21	2.26e-20
56548	-12.0186	8.88e-21	2.32e-20
10042	12.018	8.9e-21	2.32e-20
8336	12.0165	8.96e-21	2.34e-20
115727	-12.0075	9.36e-21	2.44e-20
55657	12.0024	9.6e-21	2.49e-20
10409	-12.0007	9.67e-21	2.51e-20
3915	12.0003	9.69e-21	2.52e-20
6663	-11.9971	9.84e-21	2.55e-20
3820	-11.9958	9.9e-21	2.57e-20
26578	-11.9927	1.01e-20	2.6e-20
84629	11.9916	1.01e-20	2.62e-20
23113	11.9898	1.02e-20	2.64e-20
4091	-11.9856	1.04e-20	2.69e-20
7070	11.9851	1.04e-20	2.69e-20
116461	11.9845	1.05e-20	2.7e-20
84900	11.9824	1.06e-20	2.72e-20
285989	11.9813	1.06e-20	2.74e-20
192668	-11.9804	1.07e-20	2.75e-20
57798	11.971	1.12e-20	2.87e-20
200186	11.9706	1.12e-20	2.87e-20
5322	-11.9649	1.15e-20	2.95e-20
6464	11.9646	1.15e-20	2.95e-20
387787	11.9627	1.16e-20	2.98e-20
4591	11.9531	1.22e-20	3.11e-20
79974	-11.953	1.22e-20	3.11e-20
284613	11.9514	1.23e-20	3.14e-20
11097	11.9492	1.24e-20	3.17e-20
9552	-11.9491	1.24e-20	3.17e-20
26034	-11.9426	1.28e-20	3.26e-20
11062	11.9393	1.3e-20	3.31e-20
10196	11.939	1.3e-20	3.32e-20
91775	-11.9295	1.36e-20	3.46e-20
22822	-11.9247	1.39e-20	3.54e-20
151393	-11.9222	1.41e-20	3.58e-20
79924	11.9155	1.46e-20	3.69e-20
10052	11.915	1.46e-20	3.7e-20
1616	11.9126	1.48e-20	3.74e-20
128061	11.9063	1.52e-20	3.85e-20
10014	11.9059	1.53e-20	3.85e-20
7175	11.9051	1.53e-20	3.87e-20
28796	-11.9036	1.54e-20	3.89e-20
84542	11.8937	1.62e-20	4.07e-20
8690	11.8932	1.62e-20	4.08e-20
587	11.8925	1.63e-20	4.09e-20
10144	-11.8894	1.65e-20	4.15e-20
6949	11.8878	1.66e-20	4.18e-20
220296	-11.8868	1.67e-20	4.2e-20
816	-11.8852	1.69e-20	4.23e-20
10614	-11.8839	1.7e-20	4.25e-20
84915	11.8817	1.71e-20	4.29e-20
84283	11.8809	1.72e-20	4.31e-20
38	-11.8797	1.73e-20	4.33e-20
56849	-11.8793	1.73e-20	4.34e-20
445815	-11.875	1.77e-20	4.42e-20
11127	11.8717	1.8e-20	4.49e-20
969	-11.871	1.8e-20	4.5e-20
122664	-11.8699	1.81e-20	4.53e-20
1856	11.8647	1.86e-20	4.63e-20
6597	11.8623	1.88e-20	4.68e-20
23636	11.8599	1.9e-20	4.73e-20
54149	-11.8571	1.93e-20	4.79e-20
57534	11.856	1.94e-20	4.81e-20
730101	11.855	1.95e-20	4.83e-20
5618	11.8545	1.95e-20	4.84e-20
955	11.8493	2e-20	4.96e-20
29985	11.8472	2.02e-20	5.01e-20
57688	-11.8425	2.07e-20	5.12e-20
10652	11.8419	2.08e-20	5.13e-20
197021	11.8399	2.1e-20	5.18e-20
116238	11.8342	2.15e-20	5.31e-20
9890	11.824	2.26e-20	5.56e-20
1196	11.8228	2.28e-20	5.59e-20
7248	11.8188	2.32e-20	5.69e-20
55930	11.8175	2.33e-20	5.73e-20
1620	-11.8115	2.4e-20	5.88e-20
5067	-11.81	2.42e-20	5.92e-20
23215	11.8093	2.43e-20	5.94e-20
4495	-11.8039	2.49e-20	6.09e-20
9820	11.8038	2.49e-20	6.09e-20
4905	11.8022	2.51e-20	6.13e-20
11143	11.7982	2.56e-20	6.24e-20
388780	11.797	2.58e-20	6.28e-20
148789	11.7961	2.59e-20	6.3e-20
79723	11.7959	2.59e-20	6.31e-20
51074	11.7927	2.63e-20	6.4e-20
64641	11.7913	2.65e-20	6.44e-20
55182	11.791	2.65e-20	6.45e-20
56901	11.7906	2.66e-20	6.46e-20
5716	11.7906	2.66e-20	6.46e-20
731450	11.7892	2.68e-20	6.5e-20
6363	-11.7872	2.7e-20	6.56e-20
284018	11.7808	2.79e-20	6.74e-20
9129	11.7808	2.79e-20	6.75e-20
3553	-11.7795	2.8e-20	6.78e-20
1186	11.7787	2.82e-20	6.81e-20
58189	-11.7728	2.9e-20	6.99e-20
255252	11.7716	2.91e-20	7.03e-20
23024	-11.765	3.01e-20	7.25e-20
119467	-11.7615	3.06e-20	7.36e-20
9551	11.7615	3.06e-20	7.36e-20
84619	-11.7607	3.07e-20	7.39e-20
23029	11.7562	3.14e-20	7.54e-20
10928	11.7459	3.3e-20	7.91e-20
55610	11.7452	3.31e-20	7.93e-20
80092	11.7443	3.32e-20	7.96e-20
54976	11.7388	3.41e-20	8.16e-20
8535	11.7354	3.47e-20	8.29e-20
7940	-11.7348	3.48e-20	8.32e-20
64129	-11.7344	3.48e-20	8.33e-20
9480	11.7288	3.58e-20	8.55e-20
85451	11.7275	3.6e-20	8.6e-20
672	11.7267	3.62e-20	8.63e-20
348793	11.7198	3.74e-20	8.9e-20
79872	11.7183	3.77e-20	8.96e-20
79847	11.7174	3.78e-20	9e-20
400961	-11.7167	3.8e-20	9.03e-20
91431	11.7119	3.88e-20	9.23e-20
10687	-11.7045	4.03e-20	9.54e-20
3554	-11.7041	4.03e-20	9.56e-20
8519	-11.7004	4.11e-20	9.72e-20
11026	-11.6966	4.18e-20	9.89e-20
8676	-11.6961	4.19e-20	9.91e-20
51604	11.6929	4.26e-20	1.01e-19
10060	-11.6927	4.26e-20	1.01e-19
5988	-11.6925	4.27e-20	1.01e-19
11077	11.6909	4.3e-20	1.01e-19
202151	-11.6872	4.38e-20	1.03e-19
54662	11.6858	4.41e-20	1.04e-19
92304	-11.6782	4.57e-20	1.07e-19
63982	-11.6768	4.6e-20	1.08e-19
80350	-11.6723	4.7e-20	1.1e-19
5732	-11.6696	4.76e-20	1.12e-19
4968	11.669	4.78e-20	1.12e-19
3043	-11.6679	4.8e-20	1.13e-19
49854	-11.667	4.83e-20	1.13e-19
79574	11.6584	5.03e-20	1.17e-19
92960	-11.6574	5.05e-20	1.18e-19
4846	-11.6543	5.13e-20	1.2e-19
90410	11.6509	5.22e-20	1.21e-19
58484	-11.6507	5.22e-20	1.22e-19
7551	11.6506	5.22e-20	1.22e-19
5883	11.6492	5.26e-20	1.22e-19
1844	-11.6484	5.28e-20	1.23e-19
150383	11.6483	5.28e-20	1.23e-19
64388	-11.644	5.39e-20	1.25e-19
85459	11.6393	5.52e-20	1.28e-19
9672	-11.637	5.58e-20	1.29e-19
5335	11.6334	5.68e-20	1.32e-19
8851	11.6323	5.71e-20	1.32e-19
27320	11.6296	5.78e-20	1.34e-19
81928	11.628	5.83e-20	1.35e-19
641	11.6233	5.96e-20	1.38e-19
10314	11.6141	6.23e-20	1.44e-19
249	-11.6135	6.25e-20	1.44e-19
59341	-11.6131	6.26e-20	1.44e-19
6601	11.6075	6.43e-20	1.48e-19
6563	-11.6075	6.43e-20	1.48e-19
9465	-11.6055	6.5e-20	1.49e-19
51547	11.6049	6.51e-20	1.5e-19
2308	-11.6022	6.6e-20	1.51e-19
1555	-11.5985	6.72e-20	1.54e-19
8671	-11.5976	6.75e-20	1.55e-19
50489	-11.5958	6.81e-20	1.56e-19
401052	11.5934	6.89e-20	1.58e-19
27154	11.5913	6.96e-20	1.59e-19
57521	11.585	7.17e-20	1.64e-19
2203	-11.5814	7.3e-20	1.66e-19
79829	11.5801	7.34e-20	1.67e-19
90324	11.5744	7.55e-20	1.72e-19
2346	-11.5742	7.55e-20	1.72e-19
117145	11.5736	7.58e-20	1.72e-19
92292	-11.5702	7.7e-20	1.75e-19
7298	11.5696	7.73e-20	1.75e-19
23248	11.5694	7.73e-20	1.76e-19
2187	11.5691	7.75e-20	1.76e-19
55240	-11.5685	7.77e-20	1.76e-19
7398	11.5685	7.77e-20	1.76e-19
4893	11.5655	7.88e-20	1.79e-19
284513	11.5642	7.93e-20	1.8e-19
8807	-11.5623	8e-20	1.81e-19
8615	-11.5587	8.15e-20	1.84e-19
5947	-11.5558	8.26e-20	1.87e-19
3426	-11.5544	8.31e-20	1.88e-19
11190	11.5452	8.69e-20	1.96e-19
149832	11.5439	8.75e-20	1.97e-19
339344	11.5414	8.86e-20	1.99e-19
23031	11.5382	8.99e-20	2.02e-19
283989	11.5356	9.11e-20	2.05e-19
440731	11.5354	9.12e-20	2.05e-19
10929	-11.5349	9.14e-20	2.05e-19
79736	11.5344	9.16e-20	2.06e-19
54069	11.5323	9.25e-20	2.08e-19
197257	-11.5306	9.33e-20	2.09e-19
10871	-11.5253	9.57e-20	2.14e-19
84865	11.5226	9.7e-20	2.17e-19
64084	-11.5206	9.8e-20	2.19e-19
79902	11.5163	1e-19	2.23e-19
387680	11.5144	1.01e-19	2.25e-19
3837	11.5109	1.03e-19	2.29e-19
84964	11.5104	1.03e-19	2.29e-19
285268	11.5068	1.05e-19	2.33e-19
55897	11.5068	1.05e-19	2.33e-19
55616	11.5061	1.05e-19	2.34e-19
2690	-11.5058	1.05e-19	2.34e-19
1763	11.5041	1.06e-19	2.36e-19
219972	-11.5033	1.06e-19	2.36e-19
2805	-11.4999	1.08e-19	2.4e-19
8436	-11.488	1.15e-19	2.54e-19
59307	-11.4874	1.15e-19	2.54e-19
8801	-11.482	1.18e-19	2.61e-19
1476	11.481	1.19e-19	2.62e-19
4634	-11.4803	1.19e-19	2.63e-19
57050	-11.4798	1.19e-19	2.64e-19
54941	-11.4794	1.2e-19	2.64e-19
285590	11.4693	1.26e-19	2.77e-19
10744	11.4675	1.27e-19	2.79e-19
1788	11.465	1.28e-19	2.82e-19
6721	11.4641	1.29e-19	2.83e-19
5205	11.462	1.3e-19	2.86e-19
8613	-11.4567	1.33e-19	2.93e-19
144305	11.4551	1.34e-19	2.95e-19
5606	-11.455	1.35e-19	2.95e-19
3195	11.4467	1.4e-19	3.07e-19
8818	11.4437	1.42e-19	3.11e-19
134266	11.4423	1.43e-19	3.13e-19
23126	11.4402	1.45e-19	3.16e-19
254295	-11.4387	1.46e-19	3.18e-19
439	11.426	1.55e-19	3.38e-19
5427	11.4253	1.55e-19	3.39e-19
10592	11.4218	1.58e-19	3.44e-19
2976	11.4192	1.6e-19	3.48e-19
11213	-11.4171	1.62e-19	3.52e-19
4837	-11.415	1.63e-19	3.55e-19
55248	11.4126	1.65e-19	3.59e-19
3479	-11.4065	1.7e-19	3.69e-19
55303	-11.4034	1.73e-19	3.75e-19
5742	-11.4006	1.75e-19	3.8e-19
7225	11.3988	1.77e-19	3.83e-19
3164	-11.3957	1.79e-19	3.88e-19
57604	-11.3954	1.8e-19	3.89e-19
145748	11.393	1.82e-19	3.93e-19
727736	11.388	1.86e-19	4.02e-19
114299	-11.3857	1.88e-19	4.07e-19
2180	-11.3805	1.93e-19	4.16e-19
10902	11.38	1.94e-19	4.17e-19
5274	11.3759	1.97e-19	4.25e-19
902	-11.375	1.98e-19	4.27e-19
10878	-11.373	2e-19	4.31e-19
1263	-11.3716	2.02e-19	4.33e-19
4795	11.3679	2.05e-19	4.41e-19
25973	11.3637	2.09e-19	4.49e-19
124995	11.362	2.11e-19	4.53e-19
8778	-11.3604	2.13e-19	4.56e-19
6542	-11.3602	2.13e-19	4.56e-19
6873	11.3584	2.15e-19	4.6e-19
3514	-11.3566	2.17e-19	4.64e-19
23163	11.355	2.19e-19	4.67e-19
8449	11.3543	2.19e-19	4.69e-19
5142	-11.3527	2.21e-19	4.72e-19
2178	11.3463	2.28e-19	4.86e-19
28981	11.3458	2.29e-19	4.87e-19
1843	-11.3435	2.31e-19	4.93e-19
9585	11.3386	2.37e-19	5.04e-19
118433	11.3334	2.43e-19	5.16e-19
27165	-11.3322	2.44e-19	5.19e-19
9231	11.3294	2.47e-19	5.26e-19
339201	11.3292	2.48e-19	5.26e-19
64063	-11.3285	2.49e-19	5.28e-19
6347	-11.3264	2.51e-19	5.33e-19
27235	-11.3174	2.62e-19	5.55e-19
84134	11.317	2.63e-19	5.56e-19
9424	-11.3164	2.64e-19	5.58e-19
1119	11.3141	2.67e-19	5.63e-19
2273	-11.3106	2.71e-19	5.72e-19
148811	-11.3085	2.74e-19	5.78e-19
221078	-11.3049	2.79e-19	5.87e-19
1019	11.3003	2.85e-19	6e-19
7007	-11.3002	2.85e-19	6e-19
3712	-11.2995	2.86e-19	6.02e-19
375260	11.2989	2.87e-19	6.04e-19
9670	11.2969	2.9e-19	6.09e-19
404636	11.2956	2.92e-19	6.13e-19
51225	-11.2942	2.94e-19	6.16e-19
149478	-11.2928	2.96e-19	6.2e-19
55342	11.2921	2.97e-19	6.22e-19
4982	-11.29	3e-19	6.28e-19
5977	11.284	3.08e-19	6.46e-19
285643	11.282	3.12e-19	6.52e-19
203068	11.2786	3.17e-19	6.62e-19
139201	-11.2773	3.19e-19	6.66e-19
441024	-11.2755	3.22e-19	6.72e-19
79805	11.2744	3.23e-19	6.75e-19
9473	-11.2672	3.35e-19	6.98e-19
83716	-11.2666	3.36e-19	7e-19
134359	11.2661	3.37e-19	7.01e-19
1983	-11.2633	3.41e-19	7.11e-19
89845	11.2548	3.56e-19	7.39e-19
23070	11.2527	3.59e-19	7.46e-19
6279	-11.2485	3.67e-19	7.6e-19
11275	-11.2439	3.75e-19	7.77e-19
1434	11.2422	3.78e-19	7.83e-19
644010	11.2409	3.8e-19	7.87e-19
899	11.2386	3.85e-19	7.96e-19
57282	-11.2363	3.89e-19	8.04e-19
84803	-11.2349	3.92e-19	8.09e-19
360	-11.2347	3.92e-19	8.1e-19
1020	11.2337	3.94e-19	8.14e-19
1102	-11.2315	3.98e-19	8.22e-19
8548	11.2306	4e-19	8.25e-19
25809	11.2271	4.07e-19	8.39e-19
9499	-11.2178	4.26e-19	8.75e-19
728715	11.2168	4.28e-19	8.79e-19
55072	11.2148	4.32e-19	8.87e-19
9569	11.2108	4.4e-19	9.03e-19
84231	11.2094	4.43e-19	9.09e-19
159090	11.2089	4.44e-19	9.11e-19
25927	-11.2073	4.48e-19	9.18e-19
2717	11.2055	4.52e-19	9.25e-19
6366	-11.204	4.55e-19	9.32e-19
8974	11.2022	4.59e-19	9.39e-19
29941	11.1999	4.64e-19	9.49e-19
735	-11.1995	4.65e-19	9.51e-19
221272	11.1986	4.67e-19	9.55e-19
26151	11.1982	4.68e-19	9.57e-19
84851	11.1963	4.72e-19	9.64e-19
26090	11.1942	4.77e-19	9.74e-19
9448	11.1873	4.94e-19	1.01e-18
63943	11.1815	5.08e-19	1.03e-18
219743	11.1753	5.23e-19	1.06e-18
286827	11.1748	5.25e-19	1.07e-18
646962	11.1745	5.25e-19	1.07e-18
55689	11.1717	5.33e-19	1.08e-18
29798	11.1684	5.41e-19	1.1e-18
22914	-11.1618	5.59e-19	1.13e-18
8175	11.1612	5.6e-19	1.13e-18
29085	11.1611	5.61e-19	1.13e-18
1491	-11.1595	5.65e-19	1.14e-18
57680	11.155	5.78e-19	1.17e-18
1723	-11.1518	5.87e-19	1.18e-18
3607	11.1515	5.88e-19	1.19e-18
57125	11.1493	5.94e-19	1.2e-18
10613	-11.1489	5.95e-19	1.2e-18
3609	11.1441	6.09e-19	1.23e-18
3209	11.1425	6.14e-19	1.24e-18
9655	11.1405	6.2e-19	1.25e-18
548645	-11.1363	6.33e-19	1.27e-18
83853	-11.1333	6.42e-19	1.29e-18
11260	11.1332	6.42e-19	1.29e-18
147341	-11.1307	6.5e-19	1.3e-18
10288	-11.1286	6.57e-19	1.32e-18
54676	11.1273	6.61e-19	1.32e-18
6602	11.1273	6.61e-19	1.32e-18
3696	-11.126	6.65e-19	1.33e-18
90522	11.1218	6.79e-19	1.36e-18
114905	-11.1209	6.82e-19	1.36e-18
8266	11.1198	6.86e-19	1.37e-18
55722	11.1157	6.99e-19	1.4e-18
3572	-11.1153	7.01e-19	1.4e-18
256435	-11.114	7.05e-19	1.41e-18
29095	11.1136	7.07e-19	1.41e-18
55959	-11.1126	7.1e-19	1.41e-18
51428	11.102	7.48e-19	1.49e-18
54463	-11.1007	7.52e-19	1.49e-18
29920	11.0999	7.55e-19	1.5e-18
124222	11.0998	7.56e-19	1.5e-18
5865	11.0994	7.57e-19	1.5e-18
23649	11.0938	7.78e-19	1.54e-18
64764	11.0931	7.81e-19	1.55e-18
148327	11.0909	7.89e-19	1.56e-18
1436	-11.0904	7.91e-19	1.57e-18
56947	11.0888	7.97e-19	1.58e-18
112817	-11.0872	8.04e-19	1.59e-18
23498	-11.0858	8.09e-19	1.6e-18
339230	11.0825	8.22e-19	1.62e-18
152015	-11.0824	8.22e-19	1.62e-18
760	-11.0792	8.36e-19	1.65e-18
401152	-11.0788	8.37e-19	1.65e-18
91614	-11.0713	8.68e-19	1.71e-18
27166	11.0691	8.78e-19	1.73e-18
6442	-11.0674	8.85e-19	1.74e-18
127	-11.0657	8.93e-19	1.75e-18
64407	-11.0652	8.94e-19	1.76e-18
467	-11.0647	8.97e-19	1.76e-18
55571	11.0556	9.37e-19	1.84e-18
10750	-11.053	9.49e-19	1.86e-18
6608	11.049	9.68e-19	1.89e-18
10611	-11.0475	9.75e-19	1.91e-18
23385	11.0444	9.9e-19	1.94e-18
728705	11.04	1.01e-18	1.98e-18
4828	11.0383	1.02e-18	1.99e-18
4175	11.0344	1.04e-18	2.03e-18
388969	11.0344	1.04e-18	2.03e-18
8563	11.0333	1.04e-18	2.04e-18
22827	11.029	1.07e-18	2.08e-18
64838	-11.0238	1.09e-18	2.13e-18
27309	-11.0219	1.1e-18	2.15e-18
8425	-11.0205	1.11e-18	2.16e-18
2760	11.0193	1.12e-18	2.17e-18
64761	11.018	1.13e-18	2.19e-18
5889	11.0155	1.14e-18	2.21e-18
3055	-11.0117	1.16e-18	2.25e-18
7957	-11.0101	1.17e-18	2.27e-18
27101	11.0101	1.17e-18	2.27e-18
344405	11.01	1.17e-18	2.27e-18
84281	-10.9987	1.24e-18	2.39e-18
9829	10.9983	1.24e-18	2.39e-18
2113	-10.9951	1.26e-18	2.43e-18
4522	-10.9914	1.28e-18	2.47e-18
151230	10.9912	1.28e-18	2.48e-18
63897	10.9882	1.3e-18	2.51e-18
5451	10.9866	1.31e-18	2.53e-18
55589	-10.9854	1.32e-18	2.54e-18
79866	10.9792	1.36e-18	2.62e-18
654434	10.9766	1.38e-18	2.65e-18
123041	-10.9749	1.39e-18	2.67e-18
3298	10.9689	1.43e-18	2.74e-18
29781	10.9672	1.44e-18	2.76e-18
54874	10.9671	1.44e-18	2.77e-18
256880	10.9637	1.47e-18	2.81e-18
1848	-10.9589	1.5e-18	2.87e-18
7186	10.9586	1.5e-18	2.87e-18
57684	10.9582	1.51e-18	2.88e-18
23584	-10.9504	1.57e-18	2.98e-18
140809	10.9501	1.57e-18	2.99e-18
1197	10.95	1.57e-18	2.99e-18
83937	10.9498	1.57e-18	2.99e-18
6783	-10.9495	1.57e-18	3e-18
162239	-10.9479	1.58e-18	3.02e-18
64097	-10.9477	1.59e-18	3.02e-18
3978	10.9456	1.6e-18	3.05e-18
1047	10.9429	1.62e-18	3.09e-18
80119	10.9386	1.66e-18	3.15e-18
399909	10.9372	1.67e-18	3.17e-18
5367	10.9303	1.73e-18	3.27e-18
23135	-10.9275	1.75e-18	3.31e-18
11198	10.926	1.76e-18	3.33e-18
166929	-10.9253	1.77e-18	3.35e-18
1857	10.9202	1.81e-18	3.42e-18
3782	10.9189	1.83e-18	3.44e-18
57409	10.9178	1.84e-18	3.46e-18
284486	10.9172	1.84e-18	3.47e-18
55093	10.9164	1.85e-18	3.48e-18
283431	10.9161	1.85e-18	3.49e-18
10462	-10.9153	1.86e-18	3.5e-18
392465	-10.9144	1.87e-18	3.51e-18
3059	-10.914	1.87e-18	3.52e-18
1478	10.9128	1.88e-18	3.54e-18
63922	10.9108	1.9e-18	3.57e-18
50854	10.9071	1.93e-18	3.63e-18
5783	-10.9053	1.95e-18	3.66e-18
126364	-10.9052	1.95e-18	3.66e-18
2781	10.9043	1.96e-18	3.68e-18
2188	10.9038	1.97e-18	3.69e-18
5834	10.9036	1.97e-18	3.69e-18
7746	10.9018	1.99e-18	3.72e-18
3162	-10.9014	1.99e-18	3.73e-18
23355	10.9011	1.99e-18	3.73e-18
57683	-10.9003	2e-18	3.75e-18
57469	-10.8941	2.06e-18	3.85e-18
4320	10.8919	2.08e-18	3.89e-18
5387	10.8895	2.11e-18	3.93e-18
847	-10.8891	2.11e-18	3.94e-18
9021	-10.8873	2.13e-18	3.97e-18
11070	10.8869	2.13e-18	3.98e-18
81537	-10.8845	2.16e-18	4.02e-18
440145	10.8829	2.18e-18	4.05e-18
641654	-10.8814	2.19e-18	4.08e-18
84310	10.8792	2.22e-18	4.12e-18
10402	-10.879	2.22e-18	4.12e-18
9891	10.8783	2.23e-18	4.14e-18
728743	10.8783	2.23e-18	4.14e-18
9976	-10.8765	2.25e-18	4.17e-18
54855	-10.8747	2.27e-18	4.2e-18
8793	-10.8726	2.29e-18	4.24e-18
818	10.8723	2.29e-18	4.25e-18
23542	10.8681	2.34e-18	4.33e-18
23094	10.8595	2.44e-18	4.5e-18
27300	10.8594	2.44e-18	4.51e-18
2625	-10.8573	2.47e-18	4.55e-18
11194	10.8543	2.5e-18	4.61e-18
7133	-10.8541	2.51e-18	4.62e-18
10979	-10.8536	2.51e-18	4.63e-18
1786	10.8529	2.52e-18	4.64e-18
220158	-10.8521	2.53e-18	4.66e-18
3608	10.8512	2.54e-18	4.68e-18
25890	-10.8503	2.55e-18	4.7e-18
200933	10.8451	2.62e-18	4.81e-18
1398	-10.8442	2.63e-18	4.83e-18
23136	-10.8437	2.64e-18	4.84e-18
60625	10.8419	2.66e-18	4.88e-18
5576	10.8406	2.68e-18	4.91e-18
55721	10.8391	2.7e-18	4.94e-18
54478	10.8352	2.75e-18	5.03e-18
23557	10.8348	2.75e-18	5.04e-18
713	-10.8319	2.79e-18	5.11e-18
9158	10.8306	2.81e-18	5.14e-18
633	-10.8276	2.85e-18	5.21e-18
57446	10.8245	2.89e-18	5.29e-18
200298	10.8232	2.91e-18	5.32e-18
57510	10.8226	2.92e-18	5.33e-18
55094	10.8186	2.98e-18	5.43e-18
5981	10.8173	3e-18	5.47e-18
120376	10.8113	3.09e-18	5.62e-18
8208	10.8061	3.17e-18	5.75e-18
3015	10.806	3.17e-18	5.76e-18
7407	10.8052	3.18e-18	5.78e-18
285971	10.8042	3.2e-18	5.8e-18
4097	10.8034	3.21e-18	5.82e-18
345275	-10.7982	3.29e-18	5.96e-18
85450	-10.7979	3.3e-18	5.97e-18
145873	10.7963	3.32e-18	6.02e-18
90120	10.7939	3.36e-18	6.08e-18
25854	-10.7927	3.38e-18	6.12e-18
1069	10.7901	3.43e-18	6.19e-18
54566	-10.789	3.44e-18	6.22e-18
23139	10.789	3.44e-18	6.22e-18
286101	10.7843	3.52e-18	6.36e-18
643501	-10.7842	3.53e-18	6.36e-18
2870	10.7832	3.54e-18	6.39e-18
2646	-10.783	3.55e-18	6.39e-18
2842	10.7817	3.57e-18	6.43e-18
254827	-10.7775	3.64e-18	6.55e-18
7364	-10.7745	3.7e-18	6.65e-18
92335	10.7723	3.74e-18	6.71e-18
1030	10.7706	3.77e-18	6.76e-18
124976	-10.7693	3.79e-18	6.8e-18
22849	-10.765	3.87e-18	6.94e-18
55144	10.7647	3.88e-18	6.95e-18
1312	-10.7646	3.88e-18	6.95e-18
340385	10.764	3.89e-18	6.97e-18
7053	10.762	3.93e-18	7.03e-18
2941	10.7615	3.94e-18	7.05e-18
441631	-10.7611	3.95e-18	7.06e-18
400793	10.7603	3.96e-18	7.08e-18
7701	10.7541	4.08e-18	7.29e-18
9737	-10.7511	4.15e-18	7.39e-18
79758	-10.7505	4.16e-18	7.41e-18
285521	-10.7502	4.16e-18	7.42e-18
25788	10.7495	4.18e-18	7.44e-18
64776	-10.7491	4.19e-18	7.45e-18
10912	-10.749	4.19e-18	7.45e-18
8490	10.7483	4.2e-18	7.48e-18
27319	-10.7457	4.26e-18	7.57e-18
57506	10.7431	4.31e-18	7.66e-18
54508	-10.7429	4.32e-18	7.66e-18
3791	-10.7425	4.32e-18	7.68e-18
55151	10.7365	4.45e-18	7.89e-18
199745	10.7363	4.46e-18	7.9e-18
284422	-10.7328	4.53e-18	8.03e-18
758	-10.7294	4.61e-18	8.15e-18
360219	-10.7247	4.72e-18	8.33e-18
79901	-10.7219	4.78e-18	8.44e-18
23406	-10.7203	4.82e-18	8.5e-18
10330	10.7186	4.86e-18	8.57e-18
253152	10.7184	4.86e-18	8.58e-18
57325	10.7141	4.97e-18	8.75e-18
6522	10.7137	4.98e-18	8.76e-18
9994	10.7124	5.01e-18	8.81e-18
347734	10.7082	5.11e-18	8.98e-18
8320	-10.7059	5.17e-18	9.08e-18
117246	10.7054	5.18e-18	9.1e-18
168374	10.704	5.22e-18	9.16e-18
22976	10.7037	5.23e-18	9.17e-18
155038	-10.7025	5.26e-18	9.22e-18
22895	-10.701	5.3e-18	9.28e-18
4645	-10.701	5.3e-18	9.28e-18
10418	-10.7002	5.32e-18	9.32e-18
4284	-10.7001	5.32e-18	9.32e-18
5298	10.6994	5.34e-18	9.35e-18
55870	10.6957	5.43e-18	9.51e-18
9595	-10.6927	5.52e-18	9.64e-18
4163	-10.6913	5.55e-18	9.7e-18
91464	10.6904	5.58e-18	9.74e-18
2775	-10.6893	5.61e-18	9.79e-18
4000	10.688	5.64e-18	9.85e-18
27232	-10.6869	5.67e-18	9.9e-18
54962	10.685	5.73e-18	9.99e-18
23327	10.6829	5.79e-18	1.01e-17
54509	10.6814	5.83e-18	1.02e-17
8639	-10.679	5.9e-18	1.03e-17
29843	10.6755	6e-18	1.04e-17
10888	-10.6721	6.1e-18	1.06e-17
219928	-10.6713	6.13e-18	1.06e-17
8566	10.6713	6.13e-18	1.06e-17
84268	-10.6708	6.14e-18	1.07e-17
6622	-10.667	6.25e-18	1.08e-17
79818	10.6591	6.5e-18	1.13e-17
389658	-10.6547	6.64e-18	1.15e-17
4306	-10.6464	6.92e-18	1.19e-17
5314	-10.6444	6.99e-18	1.21e-17
200634	-10.6438	7.01e-18	1.21e-17
317649	-10.6425	7.05e-18	1.22e-17
1486	-10.6414	7.09e-18	1.22e-17
4255	-10.6412	7.1e-18	1.22e-17
4213	-10.6402	7.13e-18	1.23e-17
8314	10.6377	7.22e-18	1.24e-17
51285	10.6366	7.26e-18	1.25e-17
1757	-10.6353	7.31e-18	1.26e-17
339324	10.6332	7.38e-18	1.27e-17
908	10.6283	7.56e-18	1.3e-17
146712	10.6238	7.73e-18	1.33e-17
1122	10.6072	8.38e-18	1.43e-17
9191	10.6029	8.56e-18	1.46e-17
9926	10.5988	8.73e-18	1.49e-17
79897	10.5918	9.04e-18	1.54e-17
5740	-10.5892	9.16e-18	1.56e-17
5013	10.5842	9.38e-18	1.6e-17
170482	-10.5828	9.45e-18	1.61e-17
1374	-10.5798	9.58e-18	1.63e-17
83992	-10.5785	9.65e-18	1.64e-17
111	-10.5782	9.66e-18	1.64e-17
5552	-10.5782	9.66e-18	1.64e-17
51575	10.5782	9.66e-18	1.64e-17
23657	10.5781	9.67e-18	1.64e-17
3725	-10.5741	9.86e-18	1.67e-17
3700	-10.5724	9.94e-18	1.68e-17
10500	10.5717	9.97e-18	1.69e-17
26504	10.5714	9.99e-18	1.69e-17
9535	-10.5704	1e-17	1.7e-17
7707	10.5684	1.01e-17	1.72e-17
168455	-10.5673	1.02e-17	1.73e-17
440944	10.5654	1.03e-17	1.74e-17
10479	10.5627	1.04e-17	1.76e-17
29907	10.5625	1.04e-17	1.76e-17
51339	-10.5617	1.05e-17	1.77e-17
51361	-10.561	1.05e-17	1.78e-17
6709	10.5584	1.06e-17	1.8e-17
4929	-10.5581	1.07e-17	1.8e-17
6929	10.5574	1.07e-17	1.81e-17
10922	10.5562	1.08e-17	1.81e-17
80007	10.5532	1.09e-17	1.84e-17
26276	10.5528	1.09e-17	1.84e-17
147166	10.5513	1.1e-17	1.86e-17
84975	10.551	1.1e-17	1.86e-17
3603	-10.5507	1.11e-17	1.86e-17
10171	-10.5477	1.12e-17	1.89e-17
10471	10.5474	1.12e-17	1.89e-17
65062	10.5458	1.13e-17	1.9e-17
8876	-10.5424	1.15e-17	1.93e-17
8726	10.5393	1.17e-17	1.96e-17
57211	-10.5367	1.18e-17	1.98e-17
202020	10.5364	1.19e-17	1.99e-17
79608	-10.5362	1.19e-17	1.99e-17
7564	10.5361	1.19e-17	1.99e-17
84988	10.5343	1.2e-17	2.01e-17
256394	-10.5343	1.2e-17	2.01e-17
3067	-10.5325	1.21e-17	2.02e-17
64081	-10.5323	1.21e-17	2.02e-17
25807	10.5315	1.21e-17	2.03e-17
23169	-10.5314	1.22e-17	2.03e-17
7365	-10.5311	1.22e-17	2.04e-17
4070	-10.5267	1.24e-17	2.08e-17
80869	10.521	1.28e-17	2.13e-17
731	-10.5196	1.29e-17	2.15e-17
23294	-10.5192	1.29e-17	2.15e-17
4580	10.5178	1.3e-17	2.16e-17
58499	-10.5166	1.31e-17	2.18e-17
285636	10.5162	1.31e-17	2.18e-17
25851	10.5146	1.32e-17	2.2e-17
116028	10.5111	1.34e-17	2.23e-17
5287	10.5104	1.35e-17	2.24e-17
64174	-10.5086	1.36e-17	2.26e-17
253264	-10.5082	1.36e-17	2.26e-17
55813	10.5068	1.37e-17	2.28e-17
56957	10.5008	1.41e-17	2.34e-17
55704	10.4986	1.43e-17	2.36e-17
7293	10.4981	1.43e-17	2.37e-17
9684	10.489	1.5e-17	2.47e-17
29958	-10.4878	1.51e-17	2.49e-17
3265	10.4865	1.51e-17	2.5e-17
84455	10.4862	1.52e-17	2.51e-17
84640	-10.4853	1.52e-17	2.52e-17
26284	10.483	1.54e-17	2.54e-17
84986	10.483	1.54e-17	2.54e-17
83752	-10.4815	1.55e-17	2.56e-17
26502	10.4797	1.57e-17	2.58e-17
27173	10.4733	1.62e-17	2.66e-17
2531	-10.4704	1.64e-17	2.7e-17
6319	10.4673	1.66e-17	2.74e-17
124491	-10.4651	1.68e-17	2.76e-17
25896	10.4628	1.7e-17	2.79e-17
129642	-10.4601	1.72e-17	2.83e-17
4174	10.4592	1.73e-17	2.84e-17
51373	10.4564	1.76e-17	2.88e-17
55974	10.4532	1.78e-17	2.92e-17
55843	-10.4498	1.81e-17	2.97e-17
51427	10.4498	1.81e-17	2.97e-17
55127	10.4435	1.87e-17	3.05e-17
55159	10.4426	1.88e-17	3.07e-17
203228	-10.442	1.88e-17	3.08e-17
150465	10.4418	1.89e-17	3.08e-17
25920	10.4398	1.9e-17	3.11e-17
388403	-10.4387	1.92e-17	3.12e-17
441016	10.438	1.92e-17	3.13e-17
4952	10.4369	1.93e-17	3.15e-17
3294	-10.4359	1.94e-17	3.16e-17
9592	-10.4347	1.95e-17	3.18e-17
51098	10.4324	1.97e-17	3.22e-17
55815	-10.4314	1.98e-17	3.23e-17
3908	-10.4302	2e-17	3.25e-17
283140	-10.4298	2e-17	3.25e-17
135228	10.4263	2.03e-17	3.31e-17
221908	10.4226	2.07e-17	3.36e-17
6584	10.4197	2.1e-17	3.41e-17
4225	-10.419	2.11e-17	3.42e-17
10974	-10.4182	2.12e-17	3.43e-17
8642	-10.4172	2.13e-17	3.45e-17
3376	10.4152	2.15e-17	3.48e-17
1879	10.415	2.15e-17	3.48e-17
1558	-10.4132	2.17e-17	3.51e-17
590	-10.4109	2.19e-17	3.55e-17
64601	10.4082	2.22e-17	3.59e-17
441771	-10.408	2.23e-17	3.6e-17
1573	-10.406	2.25e-17	3.63e-17
27302	-10.4009	2.3e-17	3.72e-17
57697	10.4006	2.31e-17	3.72e-17
2998	-10.3984	2.33e-17	3.76e-17
1635	-10.3977	2.34e-17	3.77e-17
84793	10.3951	2.37e-17	3.82e-17
7162	-10.3944	2.38e-17	3.83e-17
2950	-10.3932	2.39e-17	3.85e-17
10494	10.3867	2.47e-17	3.96e-17
3560	-10.3853	2.49e-17	3.99e-17
63035	10.3851	2.49e-17	3.99e-17
125150	-10.3846	2.5e-17	4e-17
123887	-10.3841	2.5e-17	4.01e-17
2184	-10.3824	2.52e-17	4.04e-17
10179	-10.3819	2.53e-17	4.05e-17
23708	-10.3813	2.54e-17	4.06e-17
126295	10.3803	2.55e-17	4.08e-17
25855	10.3797	2.56e-17	4.09e-17
54762	-10.3793	2.56e-17	4.1e-17
139221	-10.377	2.59e-17	4.14e-17
27148	10.376	2.6e-17	4.16e-17
1318	-10.3752	2.61e-17	4.18e-17
51380	-10.373	2.64e-17	4.22e-17
57595	-10.3688	2.7e-17	4.3e-17
2562	-10.3646	2.75e-17	4.39e-17
1960	-10.3627	2.78e-17	4.43e-17
147912	10.3626	2.78e-17	4.43e-17
9922	10.3597	2.82e-17	4.49e-17
9526	-10.3572	2.86e-17	4.54e-17
10350	-10.355	2.89e-17	4.59e-17
57459	10.3542	2.9e-17	4.6e-17
9772	10.3539	2.9e-17	4.61e-17
64599	10.3529	2.92e-17	4.63e-17
9097	10.3519	2.93e-17	4.65e-17
11259	-10.3502	2.96e-17	4.69e-17
5446	-10.3459	3.02e-17	4.78e-17
29126	-10.3452	3.03e-17	4.8e-17
728208	-10.3392	3.12e-17	4.93e-17
58526	10.3362	3.17e-17	5e-17
259232	-10.3352	3.18e-17	5.02e-17
2204	-10.3326	3.22e-17	5.08e-17
23241	10.3324	3.23e-17	5.09e-17
7296	10.3314	3.24e-17	5.11e-17
1388	10.3295	3.27e-17	5.16e-17
11232	10.3282	3.29e-17	5.19e-17
2706	-10.3276	3.3e-17	5.2e-17
53826	-10.3269	3.31e-17	5.22e-17
400573	-10.3246	3.35e-17	5.27e-17
54919	10.3237	3.37e-17	5.29e-17
51706	10.3219	3.4e-17	5.34e-17
65980	10.3201	3.43e-17	5.38e-17
92283	10.32	3.43e-17	5.38e-17
23086	-10.3166	3.49e-17	5.47e-17
55002	10.3154	3.51e-17	5.5e-17
4942	-10.3145	3.52e-17	5.52e-17
55568	10.3138	3.53e-17	5.54e-17
3003	-10.3125	3.56e-17	5.57e-17
3902	-10.3119	3.57e-17	5.59e-17
11117	-10.3109	3.58e-17	5.61e-17
5578	10.3106	3.59e-17	5.62e-17
147179	10.3103	3.59e-17	5.63e-17
81875	10.3081	3.63e-17	5.68e-17
266812	-10.3074	3.65e-17	5.7e-17
158326	-10.3053	3.68e-17	5.75e-17
3636	10.3036	3.72e-17	5.8e-17
51122	10.3034	3.72e-17	5.8e-17
348110	10.3007	3.77e-17	5.88e-17
83637	10.2996	3.79e-17	5.91e-17
54953	10.2994	3.79e-17	5.91e-17
50626	10.2982	3.81e-17	5.94e-17
339175	10.2971	3.84e-17	5.97e-17
1576	-10.2928	3.92e-17	6.09e-17
79807	10.2894	3.98e-17	6.19e-17
7165	10.2875	4.02e-17	6.24e-17
92667	10.2873	4.02e-17	6.25e-17
55055	10.2837	4.1e-17	6.36e-17
2053	-10.2831	4.11e-17	6.37e-17
6580	-10.2816	4.14e-17	6.42e-17
215	10.279	4.19e-17	6.5e-17
124936	-10.2784	4.2e-17	6.51e-17
10148	-10.2768	4.24e-17	6.56e-17
10877	-10.2766	4.24e-17	6.57e-17
3953	-10.2716	4.35e-17	6.72e-17
273	-10.2697	4.39e-17	6.78e-17
9857	10.2669	4.45e-17	6.87e-17
80168	-10.2669	4.45e-17	6.87e-17
57524	10.265	4.49e-17	6.93e-17
8216	10.2607	4.59e-17	7.08e-17
343413	-10.2596	4.61e-17	7.11e-17
285398	10.2579	4.65e-17	7.17e-17
9848	-10.2527	4.77e-17	7.34e-17
389432	-10.2521	4.78e-17	7.36e-17
4137	10.2509	4.81e-17	7.4e-17
9130	10.2448	4.96e-17	7.62e-17
445347	-10.2427	5.01e-17	7.69e-17
90580	10.2398	5.08e-17	7.8e-17
10755	10.2394	5.09e-17	7.81e-17
6596	10.235	5.2e-17	7.97e-17
714	-10.2349	5.21e-17	7.98e-17
124930	10.2328	5.26e-17	8.05e-17
10516	-10.2312	5.3e-17	8.11e-17
84733	10.2301	5.33e-17	8.15e-17
3937	-10.2285	5.37e-17	8.22e-17
7517	10.2255	5.45e-17	8.33e-17
440519	10.2249	5.47e-17	8.35e-17
86	10.2239	5.49e-17	8.39e-17
89910	10.2223	5.54e-17	8.45e-17
148709	10.2208	5.58e-17	8.51e-17
2819	-10.2196	5.61e-17	8.56e-17
57585	10.2185	5.64e-17	8.6e-17
23403	10.2158	5.72e-17	8.71e-17
124637	-10.2157	5.72e-17	8.71e-17
84848	-10.2154	5.73e-17	8.73e-17
731151	10.2145	5.76e-17	8.76e-17
57184	10.2143	5.76e-17	8.77e-17
440270	10.212	5.83e-17	8.87e-17
440432	10.2094	5.9e-17	8.97e-17
116984	-10.2015	6.14e-17	9.31e-17
9023	-10.1924	6.42e-17	9.72e-17
64837	10.1919	6.43e-17	9.74e-17
64708	10.1916	6.44e-17	9.76e-17
51337	10.1907	6.47e-17	9.79e-17
22954	10.189	6.52e-17	9.87e-17
3216	-10.1886	6.54e-17	9.89e-17
84981	-10.1867	6.6e-17	9.98e-17
9330	10.1862	6.61e-17	1e-16
55100	10.1844	6.67e-17	1.01e-16
28299	-10.1815	6.77e-17	1.02e-16
1543	-10.1791	6.85e-17	1.03e-16
80167	-10.1788	6.86e-17	1.04e-16
3577	-10.1771	6.92e-17	1.04e-16
9797	10.1736	7.04e-17	1.06e-16
6599	10.1728	7.06e-17	1.06e-16
116372	10.1721	7.09e-17	1.07e-16
2030	10.1688	7.21e-17	1.09e-16
51239	10.1681	7.23e-17	1.09e-16
[truncated: 10,037 more rows]

## Sheet: sGSCA.HCC
pairid	#gene(n.set1,n.set2,n.overlap)	GSCoL	pvalue	fdr
hsa04514---hsa04062	87,125,0	3.09183	0	0
hsa04664---hsa04062	57,125,23	2.94848	0	0
hsa04370---hsa04660	55,72,25	2.94503	0	0
hsa04062---hsa04630	125,87,14	2.93603	0	0
hsa04662---hsa04630	54,87,12	2.91903	0	0
hsa04660---hsa04062	72,125,25	2.89605	0	0
hsa04660---hsa04662	72,54,35	2.88473	0	0
hsa04514---hsa04660	87,72,6	2.8639	0	0
hsa04514---hsa04060	87,158,2	2.84966	0	0
hsa04662---hsa04062	54,125,26	2.82623	0	0
hsa04621---hsa04662	38,54,5	2.81858	0	0
hsa04664---hsa04630	57,87,11	2.78544	0	0
hsa04620---hsa04662	65,54,16	2.76743	0	0
hsa04060---hsa04660	158,72,4	2.75963	0	0
hsa04060---hsa04062	158,125,42	2.75728	0	0
hsa04620---hsa04660	65,72,21	2.75654	0	0
hsa04621---hsa04370	38,55,5	2.75436	0	0
hsa04660---hsa04630	72,87,17	2.73859	0	0
hsa04664---hsa04620	57,65,21	2.71053	0	0
hsa04514---hsa04630	87,87,0	2.66362	0	0
hsa04664---hsa04621	57,38,8	2.65315	0	0
hsa04370---hsa04630	55,87,9	2.61747	0	0
hsa04210---hsa04662	55,54,13	2.59455	0	0
hsa04664---hsa04060	57,158,1	2.43846	0	0
hsa04664---hsa04210	57,55,10	2.60672	0.0001	0.00089275
hsa04662---hsa04020	54,92,4	2.58348	0.0001	0.00089275
hsa04620---hsa04514	65,87,3	2.46344	0.0001	0.00089275
hsa04060---hsa04662	158,54,0	2.45052	0.0001	0.00089275
hsa04664---hsa04020	57,92,4	2.57906	0.0002	0.00163024
hsa04370---hsa04060	55,158,1	2.43972	0.0002	0.00163024
hsa04664---hsa04662	57,54,27	2.54145	0.0003	0.00224973
hsa04621---hsa04630	38,87,1	2.50985	0.0003	0.00224973
hsa04621---hsa04514	38,87,0	2.49857	0.0003	0.00224973
hsa04370---hsa04514	55,87,0	2.52173	0.0004	0.00277745
hsa04621---hsa04660	38,72,10	2.39512	0.0004	0.00277745
hsa04620---hsa04630	65,87,13	2.32941	0.0004	0.00277745
hsa04210---hsa04660	55,72,14	2.41062	0.0005	0.00323795
hsa04664---hsa04514	57,87,0	2.47441	0.0006	0.00364034
hsa04210---hsa04020	55,92,4	2.46157	0.0006	0.00364034
hsa04514---hsa04662	87,54,1	2.45118	0.0006	0.00364034
hsa04620---hsa04062	65,125,20	2.20266	0.0006	0.00364034
hsa04620---hsa04060	65,158,13	2.21356	0.0007	0.00399496
hsa04664---hsa04660	57,72,27	2.34668	0.0008	0.00430983
hsa04370---hsa04020	55,92,8	2.34077	0.0008	0.00430983
hsa04620---hsa04621	65,38,18	2.33779	0.0008	0.00430983
hsa04020---hsa04070	92,50,13	2.31114	0.0008	0.00430983
hsa04621---hsa04210	38,55,6	2.40298	0.0009	0.00459129
hsa04062---hsa04020	125,92,12	2.20322	0.0009	0.00459129
hsa04060---hsa04630	158,87,45	2.08002	0.0009	0.00459129
hsa04620---hsa04020	65,92,0	2.34288	0.0012	0.00576854
hsa04620---hsa04370	65,55,15	2.31962	0.0012	0.00576854
hsa04210---hsa04062	55,125,13	2.14448	0.0014	0.00648071
hsa04621---hsa04070	38,50,0	2.41519	0.0015	0.00681737
hsa04350---hsa04512	59,58,5	2.37379	0.0015	0.00681737
hsa04020---hsa04630	92,87,0	2.26668	0.0016	0.007142
hsa04150---hsa04020	33,92,0	2.25998	0.0017	0.00745525
hsa04510---hsa04060	129,158,12	2.11934	0.0017	0.00745525
hsa04010---hsa04630	161,87,6	2.13313	0.0018	0.00775769
hsa04070---hsa04630	50,87,6	2.24291	0.0019	0.00804989
hsa04660---hsa04070	72,50,7	2.21572	0.0026	0.0103988
hsa04620---hsa04210	65,55,16	2.19513	0.0026	0.0103988
hsa04660---hsa04020	72,92,3	2.2194	0.0029	0.0113268
hsa04621---hsa04020	38,92,0	2.22944	0.003	0.0116265
hsa04510---hsa04630	129,87,13	2.06551	0.003	0.0116265
hsa04010---hsa04660	161,72,26	1.95629	0.0031	0.0119217
hsa04662---hsa04070	54,50,9	2.20114	0.0033	0.0124985
hsa04621---hsa04062	38,125,11	2.02638	0.0042	0.0154393
hsa04510---hsa04514	129,87,4	2.07255	0.0048	0.0173056
hsa04150---hsa04621	33,38,2	2.29369	0.0054	0.0191015
hsa04370---hsa04210	55,55,13	2.10415	0.0059	0.0205471
hsa04060---hsa04070	158,50,0	1.98251	0.0059	0.0205471
hsa04664---hsa04070	57,50,11	2.03186	0.0068	0.0230394
hsa04012---hsa04020	63,92,11	1.94619	0.0068	0.0230394
hsa04621---hsa04010	38,161,14	1.89385	0.0069	0.023308
hsa04514---hsa04070	87,50,0	2.0327	0.0074	0.0246562
hsa04514---hsa04210	87,55,0	1.97418	0.0088	0.0282429
hsa04150---hsa04060	33,158,2	1.9076	0.0099	0.0308812
hsa04620---hsa04010	65,161,24	1.83205	0.0101	0.031345
hsa04514---hsa04010	87,161,0	1.89043	0.0103	0.0318042
hsa04150---hsa04514	33,87,0	2.00744	0.0105	0.0322587
hsa04110---hsa04115	92,52,20	1.885	0.0111	0.0335953
hsa04664---hsa04912	57,63,30	1.85082	0.0112	0.0338142
hsa04370---hsa04010	55,161,34	1.70321	0.0113	0.0340321
hsa04620---hsa04070	65,50,6	1.89088	0.0131	0.0380258
hsa04912---hsa04660	63,72,12	1.82437	0.014	0.0399163
hsa04510---hsa04020	129,92,8	1.80616	0.0142	0.0403273
hsa04060---hsa04210	158,55,12	1.76349	0.0143	0.0405316
hsa04510---hsa04660	129,72,24	1.71575	0.0148	0.0415411
hsa04210---hsa04070	55,50,6	1.89322	0.0152	0.0423348
hsa04912---hsa04330	63,25,0	2.01545	0.0159	0.0436946
hsa04621---hsa04510	38,129,5	1.76739	0.016	0.0438859
hsa04370---hsa04062	55,125,20	1.72149	0.0165	0.0448316
hsa04621---hsa04912	38,63,7	1.82414	0.0199	0.0515428
hsa04010---hsa04662	161,54,22	1.63558	0.02	0.0517307
hsa04621---hsa04012	38,63,4	1.84517	0.0205	0.0526625
hsa04310---hsa04630	93,87,4	1.73586	0.0208	0.0532156
hsa04912---hsa04370	63,55,23	1.65048	0.0237	0.0583381
hsa04060---hsa04012	158,63,1	1.66605	0.0239	0.0586771
hsa04010---hsa04060	161,158,13	1.63352	0.0239	0.0586771
hsa04510---hsa04210	129,55,13	1.65058	0.0244	0.0595169
hsa04910---hsa04020	90,92,6	1.69043	0.0245	0.0596836
hsa04620---hsa04912	65,63,12	1.68356	0.0249	0.060346
hsa04510---hsa04350	129,59,8	1.63822	0.0254	0.0611644
hsa04621---hsa04920	38,44,6	1.82336	0.0261	0.0622928
hsa04150---hsa04912	33,63,2	1.81108	0.0263	0.0626116
hsa04370---hsa04662	55,54,25	1.62083	0.0283	0.066424
hsa04664---hsa04370	57,55,35	1.53663	0.0294	0.0684754
hsa04150---hsa04010	33,161,7	1.6121	0.0303	0.0701305
hsa04664---hsa04150	57,33,11	1.63349	0.0372	0.0824103
hsa04010---hsa04070	161,50,2	1.52759	0.0382	0.0841032
hsa04010---hsa04062	161,125,24	1.46946	0.0386	0.0847745
hsa04664---hsa04010	57,161,35	1.39329	0.0395	0.086273
hsa04310---hsa04660	93,72,9	1.51017	0.0408	0.0884084
hsa04510---hsa04330	129,25,0	1.55655	0.0442	0.0938373
hsa04912---hsa04210	63,55,2	1.55636	0.0443	0.0939936
hsa04621---hsa04310	38,93,3	1.54257	0.0446	0.0944615
hsa04514---hsa04012	87,63,0	1.53728	0.0449	0.0949278
hsa04912---hsa04662	63,54,10	1.51996	0.0462	0.0969292
hsa04010---hsa04330	161,25,0	1.55347	0.0473	0.098599
hsa04621---hsa04060	38,158,10	1.4287	0.0491	0.101286
hsa04010---hsa04210	161,55,18	1.36294	0.0532	0.107201
hsa04150---hsa04662	33,54,11	1.50093	0.0545	0.10902
hsa04620---hsa04510	65,129,16	1.39273	0.0567	0.112038
hsa04510---hsa04062	129,125,30	1.31625	0.0573	0.112848
hsa04150---hsa04310	33,93,0	1.47771	0.0577	0.113386
hsa04012---hsa04660	63,72,27	1.35135	0.0579	0.113653
hsa04512---hsa04020	58,92,0	1.44275	0.0597	0.116037
hsa04370---hsa04070	55,50,10	1.43531	0.0599	0.116299
hsa04310---hsa04330	93,25,4	1.44498	0.0606	0.117211
hsa04912---hsa04020	63,92,22	1.29985	0.0666	0.124757
hsa04060---hsa04020	158,92,3	1.36389	0.0668	0.125
hsa04912---hsa04910	63,90,13	1.3302	0.0676	0.125968
hsa04912---hsa04630	63,87,2	1.39844	0.0691	0.127762
hsa04910---hsa04662	90,54,19	1.27544	0.0692	0.127881
hsa04150---hsa04012	33,63,14	1.32019	0.0714	0.130459
hsa04664---hsa04910	57,90,20	1.26947	0.0717	0.130806
hsa04210---hsa04012	55,63,10	1.33513	0.0728	0.13207
hsa04310---hsa04512	93,58,0	1.37635	0.0731	0.132412
hsa04912---hsa04012	63,63,20	1.26975	0.0749	0.134503
hsa04621---hsa04910	38,90,4	1.33615	0.0771	0.13701
hsa04910---hsa03320	90,51,4	1.32965	0.0783	0.138355
hsa04622---hsa04330	33,25,0	1.44736	0.0807	0.141001
hsa04150---hsa04330	33,25,0	1.45689	0.0824	0.14284
hsa04310---hsa04210	93,55,4	1.28968	0.0844	0.144967
hsa04150---hsa04062	33,125,11	1.26312	0.0853	0.145911
hsa04620---hsa04012	65,63,16	1.23829	0.086	0.14664
hsa04512---hsa04340	58,38,0	1.35852	0.0875	0.148187
hsa04370---hsa04330	55,25,0	1.35163	0.0893	0.150016
hsa04912---hsa04010	63,161,38	1.08699	0.0902	0.150919
hsa04514---hsa04330	87,25,0	1.32957	0.0914	0.152112
hsa04330---hsa04020	25,92,0	1.30567	0.0926	0.153293
hsa04912---hsa04622	63,33,5	1.24708	0.1003	0.162142
hsa04920---hsa04062	44,125,8	1.17663	0.1015	0.163484
hsa04150---hsa04370	33,55,11	1.18133	0.1029	0.165037
hsa04664---hsa04512	57,58,0	1.20401	0.1094	0.172079
hsa04150---hsa04070	33,50,6	1.20374	0.1094	0.172079
hsa04510---hsa04070	129,50,9	1.1008	0.1171	0.180078
hsa04062---hsa04070	125,50,9	1.10418	0.1176	0.180585
hsa04150---hsa04920	33,44,6	1.15715	0.1179	0.180889
hsa04622---hsa04010	33,161,10	1.07965	0.1206	0.183597
hsa04010---hsa04012	161,63,21	1.03455	0.1214	0.184392
hsa04514---hsa04920	87,44,0	1.16616	0.122	0.184985
hsa04920---hsa04662	44,54,7	1.13015	0.122	0.184985
hsa04512---hsa04662	58,54,0	1.17349	0.1225	0.185478
hsa04370---hsa04512	55,58,0	1.16321	0.1237	0.186655
hsa04620---hsa04920	65,44,8	1.09144	0.1275	0.190331
hsa04514---hsa04020	87,92,0	1.07634	0.1345	0.196901
hsa04912---hsa04514	63,87,0	1.07543	0.1379	0.200001
hsa04920---hsa03320	44,51,10	1.02918	0.1407	0.202511
hsa04310---hsa04910	93,90,5	1.05095	0.1422	0.20384
hsa04310---hsa04070	93,50,4	1.05053	0.1422	0.20384
hsa04512---hsa04070	58,50,0	1.06401	0.147	0.208022
hsa04912---hsa04920	63,44,2	1.05843	0.1471	0.208108
hsa04622---hsa04020	33,92,0	1.0676	0.1472	0.208194
hsa04622---hsa04370	33,55,3	1.05036	0.1487	0.209477
hsa04310---hsa04340	93,38,16	0.93636	0.1502	0.21075
hsa04912---hsa04070	63,50,6	0.999941	0.152	0.212265
hsa04510---hsa04512	129,58,46	0.797267	0.1532	0.213267
hsa04370---hsa04920	55,44,3	1.01723	0.1574	0.216724
hsa04920---hsa04630	44,87,7	0.956504	0.1603	0.219068
hsa04150---hsa04512	33,58,0	0.995806	0.1642	0.222165
hsa04012---hsa04662	63,54,21	0.852556	0.1674	0.22466
hsa04664---hsa04012	57,63,24	0.838115	0.1678	0.224969
hsa04310---hsa04514	93,87,0	0.955696	0.1697	0.226429
hsa04912---hsa04060	63,158,1	0.95248	0.171	0.227419
hsa04620---hsa04310	65,93,4	0.930749	0.1714	0.227723
hsa04150---hsa04630	33,87,9	0.893987	0.1719	0.228101
hsa04210---hsa04630	55,87,11	0.897996	0.1741	0.229756
hsa04310---hsa04060	93,158,0	0.929644	0.1786	0.233084
hsa04012---hsa04630	63,87,15	0.86541	0.1786	0.233084
hsa04621---hsa04622	38,33,12	0.800036	0.1801	0.234177
hsa04912---hsa04512	63,58,0	0.938602	0.1814	0.235118
hsa04910---hsa04514	90,87,1	0.919615	0.1817	0.235335
hsa04664---hsa04510	57,129,24	0.802562	0.1865	0.23914
hsa04210---hsa04330	55,25,0	0.912365	0.1884	0.240626
hsa04210---hsa04920	55,44,7	0.855286	0.1891	0.24117
hsa04510---hsa04012	129,63,34	0.744776	0.1916	0.243118
hsa04210---hsa04512	55,58,0	0.887645	0.1978	0.248391
hsa04622---hsa04310	33,93,3	0.856617	0.1992	0.249566
hsa04620---hsa04150	65,33,11	0.774953	0.2009	0.250986
hsa04150---hsa04910	33,90,21	0.654503	0.208	0.256832
hsa04310---hsa04920	93,44,2	0.842856	0.2093	0.257887
hsa04310---hsa04012	93,63,10	0.797029	0.2122	0.260226
hsa04012---hsa04512	63,58,0	0.817807	0.2184	0.265152
hsa04910---hsa04010	90,161,17	0.756557	0.2201	0.266486
hsa04512---hsa04630	58,87,0	0.793422	0.2237	0.269286
hsa04150---hsa04210	33,55,9	0.694604	0.2273	0.272055
hsa04910---hsa04920	90,44,21	0.631468	0.2318	0.275471
hsa04010---hsa04512	161,58,0	0.757055	0.2351	0.277945
hsa04115---hsa04330	52,25,0	0.741682	0.236	0.278615
hsa04621---hsa04330	38,25,0	0.721327	0.2378	0.279951
hsa04510---hsa04662	129,54,22	0.645786	0.2383	0.28032
hsa04664---hsa04920	57,44,6	0.710675	0.2395	0.281205
hsa04910---hsa04060	90,158,0	0.718978	0.2498	0.289794
hsa04621---hsa04512	38,58,0	0.710762	0.2524	0.291929
hsa04664---hsa04622	57,33,6	0.648192	0.2526	0.292093
hsa04340---hsa04020	38,92,2	0.702524	0.2533	0.292666
hsa04150---hsa04622	33,33,0	0.646317	0.2658	0.302736
hsa04350---hsa04330	59,25,1	0.653105	0.2662	0.303054
hsa04660---hsa04512	72,58,0	0.668358	0.269	0.305268
hsa04330---hsa04340	25,38,0	0.632799	0.2691	0.305347
hsa04010---hsa04920	161,44,9	0.583479	0.2873	0.319402
hsa04622---hsa04070	33,50,0	0.596478	0.2874	0.319478
hsa04370---hsa04012	55,63,23	0.466147	0.2925	0.323314
hsa04510---hsa04340	129,38,1	0.598774	0.2979	0.327329
hsa04912---hsa04310	63,93,12	0.518814	0.3041	0.331881
hsa04115---hsa04012	52,63,1	0.54445	0.3067	0.333771
hsa04310---hsa04020	93,92,11	0.539005	0.3078	0.334568
hsa04310---hsa04010	93,161,16	0.510168	0.3096	0.335867
hsa04622---hsa04662	33,54,3	0.501726	0.3101	0.336227
hsa04620---hsa04512	65,58,1	0.529422	0.3129	0.338236
hsa04510---hsa04310	129,93,11	0.507491	0.3145	0.339379
hsa04012---hsa04330	63,25,0	0.52301	0.3146	0.33945
hsa04012---hsa04062	63,125,25	0.446763	0.3211	0.344051
hsa04150---hsa04660	33,72,11	0.413065	0.3228	0.345243
hsa04622---hsa04920	33,44,7	0.399005	0.3276	0.348588
hsa04622---hsa04012	33,63,2	0.464119	0.3288	0.349418
hsa04060---hsa04920	158,44,3	0.486491	0.3296	0.349971
hsa04510---hsa04910	129,90,25	0.441902	0.3307	0.350729
hsa04370---hsa04910	55,90,17	0.402832	0.3396	0.3568
hsa04510---hsa04622	129,33,2	0.477175	0.3414	0.358015
hsa04350---hsa04020	59,92,0	0.454392	0.3485	0.362759
hsa04510---hsa04010	129,161,25	0.422708	0.3487	0.362892
hsa03320---hsa04630	51,87,0	0.429278	0.3524	0.365336
hsa04012---hsa04070	63,50,10	0.355587	0.3552	0.367173
hsa04514---hsa04340	87,38,0	0.40585	0.3609	0.370879
hsa04912---hsa04510	63,129,13	0.391846	0.3627	0.372041
hsa04115---hsa04910	52,90,1	0.391494	0.3634	0.372492
hsa04620---hsa04622	65,33,17	0.27247	0.3685	0.375755
hsa04510---hsa04920	129,44,5	0.319059	0.3975	0.393684
hsa04110---hsa04330	92,25,2	0.293874	0.3977	0.393804
hsa04910---hsa04210	90,55,15	0.265838	0.3978	0.393864
hsa04920---hsa04020	44,92,0	0.316936	0.3984	0.394224
hsa04910---hsa04630	90,87,17	0.273063	0.3995	0.394883
hsa04115---hsa04920	52,44,0	0.281377	0.3999	0.395122
hsa04115---hsa04310	52,93,3	0.26978	0.4089	0.400453
hsa04514---hsa04512	87,58,7	0.250193	0.4202	0.407016
hsa04010---hsa04020	161,92,13	0.265462	0.4232	0.408734
hsa04622---hsa04340	33,38,0	0.19467	0.4246	0.409532
hsa04510---hsa04370	129,55,23	0.192013	0.4295	0.41231
hsa04310---hsa03320	93,51,1	0.245422	0.4307	0.412986
hsa04910---hsa04512	90,58,0	0.222177	0.4307	0.412986
hsa04910---hsa04062	90,125,24	0.185872	0.4359	0.415898
hsa04920---hsa04070	44,50,0	0.177797	0.4437	0.420213
hsa04010---hsa03320	161,51,0	0.199033	0.46	0.429027
hsa04115---hsa03320	52,51,0	0.140785	0.4615	0.429825
hsa04060---hsa03320	158,51,0	0.176467	0.4644	0.431361
hsa04622---hsa04514	33,87,0	0.129369	0.465	0.431678
hsa04070---hsa03320	50,51,0	0.123501	0.4672	0.432836
hsa04622---hsa04060	33,158,4	0.149979	0.4681	0.433309
hsa04350---hsa04340	59,38,7	0.0701406	0.4693	0.433937
hsa04210---hsa03320	55,51,0	0.124427	0.4706	0.434617
hsa04512---hsa04062	58,125,0	0.143041	0.4776	0.438249
hsa04920---hsa04012	44,63,6	0.0679194	0.4781	0.438506
hsa04115---hsa04621	52,38,1	0.070559	0.4799	0.439432
hsa04622---hsa04210	33,55,5	0.0336103	0.4857	0.442393
hsa04622---hsa04630	33,87,2	0.0772647	0.4865	0.442799
hsa04110---hsa04340	92,38,1	0.0524086	0.502	0.45055
hsa04062---hsa03320	125,51,0	0.0257654	0.5182	0.458425
hsa04060---hsa04512	158,58,0	0.0375254	0.5218	0.460144
hsa04912---hsa04062	63,125,23	-0.0140484	0.5282	0.463174
hsa04620---hsa04910	65,90,14	-0.0576201	0.5387	0.468071
hsa04910---hsa04070	90,50,9	-0.068927	0.5398	0.468579
hsa04910---hsa04330	90,25,0	-0.0670097	0.5421	0.469638
hsa04310---hsa04662	93,54,11	-0.0815858	0.5499	0.473198
hsa04340---hsa03320	38,51,0	-0.138555	0.5608	0.478093
hsa04664---hsa04115	57,52,0	-0.117875	0.561	0.478182
hsa04115---hsa04070	52,50,0	-0.147944	0.5719	0.482986
hsa04622---hsa04062	33,125,4	-0.141306	0.5746	0.484162
hsa04660---hsa03320	72,51,0	-0.147805	0.5801	0.486542
hsa04330---hsa04062	25,125,0	-0.189002	0.5941	0.492501
hsa04330---hsa03320	25,51,0	-0.268681	0.6054	0.497211
hsa04620---hsa04330	65,25,0	-0.267073	0.6092	0.498775
hsa04010---hsa04340	161,38,2	-0.286114	0.6336	0.508592
hsa04110---hsa03320	92,51,0	-0.307061	0.64	0.511103
hsa04310---hsa04370	93,55,10	-0.314124	0.6407	0.511377
hsa04622---hsa04660	33,72,8	-0.354221	0.6481	0.514246
hsa04912---hsa04350	63,59,2	-0.352037	0.6519	0.515706
hsa04110---hsa04920	92,44,0	-0.358667	0.6557	0.517157
hsa04622---hsa03320	33,51,0	-0.394114	0.657	0.517652
hsa04664---hsa04310	57,93,6	-0.340789	0.6572	0.517728
hsa04622---hsa04350	33,59,1	-0.384359	0.6574	0.517804
hsa04622---hsa04910	33,90,2	-0.400851	0.6675	0.52161
hsa04115---hsa04020	52,92,0	-0.436963	0.683	0.527335
hsa04912---hsa04340	63,38,2	-0.47023	0.686	0.528427
hsa04920---hsa04512	44,58,1	-0.501395	0.6987	0.532996
hsa04110---hsa04012	92,63,4	-0.470904	0.6995	0.53328
hsa04330---hsa04070	25,50,0	-0.539998	0.7061	0.535617
hsa04920---hsa04660	44,72,9	-0.538104	0.7172	0.539495
hsa04370---hsa04340	55,38,0	-0.608827	0.7321	0.544599
hsa04620---hsa03320	65,51,0	-0.6018	0.7329	0.54487
hsa04115---hsa04370	52,55,1	-0.615478	0.7403	0.54736
hsa04920---hsa04330	44,25,0	-0.655276	0.7413	0.547694
hsa04350---hsa04920	59,44,1	-0.644796	0.7439	0.548561
hsa04350---hsa04370	59,55,2	-0.640095	0.7486	0.550121
hsa04350---hsa04310	59,93,7	-0.647428	0.7564	0.552685
hsa04510---hsa03320	129,51,1	-0.671	0.7644	0.555284
hsa04664---hsa03320	57,51,0	-0.742949	0.7735	0.558205
hsa04150---hsa04350	33,59,3	-0.7464	0.7821	0.56093
hsa04110---hsa04622	92,33,0	-0.769597	0.7858	0.562092
hsa04664---hsa04110	57,92,0	-0.779234	0.7891	0.563123
hsa04370---hsa03320	55,51,0	-0.803158	0.7914	0.563839
hsa04350---hsa04060	59,158,15	-0.744408	0.7933	0.564428
hsa04012---hsa03320	63,51,0	-0.837637	0.802	0.567108
hsa04150---hsa04340	33,38,0	-0.865874	0.8042	0.56778
hsa04060---hsa04340	158,38,2	-0.858489	0.8097	0.569452
hsa04020---hsa03320	92,51,0	-0.886128	0.8126	0.570329
hsa04621---hsa04350	38,59,3	-0.888255	0.8174	0.571771
hsa04150---hsa04110	33,92,0	-0.955956	0.8266	0.574509
hsa04330---hsa04630	25,87,1	-0.929941	0.83	0.575513
hsa04110---hsa04621	92,38,0	-1.01636	0.8454	0.579997
hsa04110---hsa04912	92,63,0	-1.02166	0.8468	0.5804
hsa04110---hsa04370	92,55,0	-1.02832	0.8479	0.580717
hsa04514---hsa03320	87,51,0	-1.05335	0.8488	0.580975
hsa04350---hsa04010	59,161,7	-1.03985	0.856	0.58303
hsa04150---hsa04510	33,129,16	-0.923164	0.8587	0.583795
hsa04621---hsa04340	38,38,0	-1.09924	0.8607	0.58436
hsa04350---hsa03320	59,51,0	-1.17314	0.8738	0.588024
hsa04664---hsa04340	57,38,0	-1.15911	0.8743	0.588163
hsa04620---hsa04115	65,52,1	-1.19115	0.8797	0.589654
hsa04110---hsa04660	92,72,2	-1.19901	0.8816	0.590176
hsa04110---hsa04310	92,93,7	-1.16042	0.8824	0.590395
hsa04115---hsa04622	52,33,1	-1.19947	0.8841	0.59086
hsa04920---hsa04340	44,38,0	-1.22193	0.886	0.591379
hsa04621---hsa03320	38,51,0	-1.23904	0.8878	0.59187
hsa04115---hsa04350	52,59,1	-1.26161	0.8943	0.593631
hsa04150---hsa04115	33,52,2	-1.22812	0.8957	0.594008
hsa04330---hsa04662	25,54,0	-1.32182	0.904	0.59623
hsa04310---hsa04062	93,125,8	-1.35785	0.9116	0.598244
hsa04664---hsa04330	57,25,0	-1.39519	0.9149	0.599112
hsa04910---hsa04660	90,72,21	-1.25338	0.9164	0.599506
hsa04350---hsa04514	59,87,0	-1.45685	0.9184	0.600029
hsa04210---hsa04340	55,38,2	-1.44397	0.923	0.601228
hsa04150---hsa03320	33,51,1	-1.43847	0.9258	0.601953
hsa04115---hsa04010	52,161,5	-1.5154	0.9305	0.603166
hsa04110---hsa04910	92,90,1	-1.59132	0.9357	0.604499
hsa04012---hsa04340	63,38,1	-1.65388	0.9486	0.607768
hsa04912---hsa03320	63,51,0	-1.78248	0.9512	0.60842
hsa04910---hsa04012	90,63,32	-1.38185	0.9518	0.608571
hsa04910---hsa04340	90,38,3	-1.73227	0.955	0.60937
hsa04512---hsa03320	58,51,1	-1.78071	0.9575	0.609992
hsa04110---hsa04070	92,50,0	-1.85185	0.958	0.610116
hsa04110---hsa04512	92,58,0	-1.90119	0.9598	0.610563
hsa04110---hsa04210	92,55,1	-1.92608	0.9634	0.611452
hsa04340---hsa04070	38,50,0	-1.85496	0.9641	0.611625
hsa04350---hsa04070	59,50,0	-1.88903	0.9649	0.611822
hsa04115---hsa04662	52,54,0	-1.88581	0.9653	0.61192
hsa04110---hsa04662	92,54,1	-1.99059	0.9673	0.612412
hsa04350---hsa04012	59,63,4	-1.93659	0.9699	0.613049
hsa04350---hsa04662	59,54,2	-2.00104	0.9733	0.613879
hsa04662---hsa04340	54,38,1	-2.09365	0.9781	0.615044
hsa04330---hsa04660	25,72,0	-2.10367	0.9788	0.615213
hsa04115---hsa04912	52,63,0	-2.19934	0.9807	0.615672
hsa04115---hsa04340	52,38,0	-2.14786	0.9812	0.615793
hsa04110---hsa04630	92,87,4	-2.51488	0.9873	0.617258
hsa04110---hsa04060	92,158,2	-2.67207	0.9878	0.617378
hsa04115---hsa04210	52,55,7	-2.20026	0.9887	0.617593
hsa04350---hsa04062	59,125,3	-2.54203	0.9888	0.617617
hsa04062---hsa04340	125,38,3	-2.4674	0.9891	0.617688
hsa04620---hsa04110	65,92,0	-2.56731	0.9891	0.617688
hsa04620---hsa04340	65,38,0	-2.5177	0.9913	0.618213
hsa04115---hsa04512	52,58,1	-2.63958	0.9932	0.618665
hsa04662---hsa03320	54,51,0	-2.72255	0.994	0.618855
hsa04350---hsa04630	59,87,3	-2.82559	0.994	0.618855
hsa04664---hsa04350	57,59,3	-2.64309	0.995	0.619092
hsa04110---hsa04020	92,92,0	-3.08933	0.9955	0.61921
hsa04110---hsa04350	92,59,10	-2.68884	0.9956	0.619234
hsa04350---hsa04210	59,55,1	-3.02599	0.9974	0.61966
hsa04110---hsa04510	92,129,3	-3.41421	0.9977	0.619731
hsa04340---hsa04630	38,87,0	-3.28944	0.9979	0.619778
hsa04350---hsa04910	59,90,3	-3.24872	0.9981	0.619825
hsa04620---hsa04350	65,59,3	-3.23758	0.9982	0.619849
hsa04115---hsa04062	52,125,0	-3.56909	0.9985	0.61992
hsa04115---hsa04630	52,87,2	-3.57276	0.9986	0.619943
hsa04115---hsa04060	52,158,1	-3.80945	0.9987	0.619967
hsa04115---hsa04514	52,87,0	-3.65997	0.9988	0.61999
hsa04115---hsa04660	52,72,1	-3.56959	0.999	0.620038
hsa04110---hsa04010	92,161,7	-3.95976	0.9994	0.620132
hsa04660---hsa04340	72,38,1	-3.87702	0.9996	0.620179
hsa04350---hsa04660	59,72,4	-3.79474	0.9998	0.620226
hsa04115---hsa04510	52,129,4	-4.44222	0.9998	0.620226
hsa04110---hsa04062	92,125,1	-4.45025	0.9999	0.62025
hsa04110---hsa04514	92,87,0	-5.31635	1	0.620273

## Sheet: weighted_genes.HCC
EntrezGene	Gene
6850	SYK
5880	RAC2
7409	VAV1
3937	LCP2
23533	PIK3R5
5294	PIK3CG
942	CD86
6352	CCL5
5293	PIK3CD
941	CD80
51311	TLR8
5579	PRKCB1
695	BTK
4283	CXCL9
6351	CCL4
3606	IL18
58484	NLRC4
834	CASP1
1234	CCR5
50615	IL21R
1439	CSF2RB
1436	CSF1R
3575	IL7R
3561	IL2RG
7040	TGFB1
3560	IL2RB
608	TNFRSF17
939	CD27
3587	IL10RA
1236	CCR7
7852	CXCR4
8807	IL18RAP
6363	CCL19
10663	CXCR6
10673	TNFSF13B
11009	IL24
80301	PLEKHO2
2207	FCER1G
57580	PREX1
59345	GNB4
3718	JAK3
54331	GNG2
7454	WAS
653361	NCF1
113	ADCY7
3055	HCK
1794	DOCK2
3702	ITK
2793	GNGT2
867	CBL
5777	PTPN6
5788	PTPRC
10125	RASGRP1
917	CD3G
916	CD3E
925	CD8A
3932	LCK
926	CD8B
919	CD247
10333	TLR6
27071	DAPP1
971	CD72
9051	PSTPIP1
9047	SH2D2A
5321	PLA2G4A
5743	PTGS2
4772	NFATC1
391013	PLA2G2C
3109	HLA-DMB
3689	ITGB2
6402	SELL
3676	ITGA4
6693	SPN
914	CD2
3111	HLA-DOA
10666	CD226
923	CD6
356	FASLG
3115	HLA-DPB1
3122	HLA-DRA
959	CD40LG
5588	PRKCQ
596	BCL2
7124	TNF
5577	PRKAR2B
2021	ENDOG
11213	IRAK3
5724	PTAFR
196883	ADCY4
814	CAMK4
10800	CYSLTR1
3269	HRH1
952	CD38
2769	GNA15
5023	P2RX1
5330	PLCB2
5026	P2RX5
3707	ITPKB
27040	LAT
11025	LILRB3
22861	NLRP1
7097	TLR2
7096	TLR1
23643	LY96
1230	CCR1
6348	CCL3
1606	DGKA
643	BLR1
4052	LTBP1
3400	ID4
1634	DCN
392255	GDF6
3399	ID3
7043	TGFB3
4093	SMAD9
7058	THBS2
1281	COL3A1
3680	ITGA9
1293	COL6A3
10319	LAMC3
1284	COL4A2
3908	LAMA2
1292	COL6A2
22801	ITGA11
7057	THBS1
1311	COMP
10000	AKT3
1282	COL4A1
64098	PARVG
85366	MYLK2
10398	MYL9
5156	PDGFRA
3082	HGF
7424	VEGFC
9175	MAP3K13
4773	NFATC2
4208	MEF2C
4215	MAP3K3
1846	DUSP4
2260	FGFR1
784	CACNB3
5159	PDGFRB
1844	DUSP2
1847	DUSP5
5881	RAC3
11184	MAP4K1
409	ARRB2
5602	MAPK10
773	CACNA1A
5305	PIP4K2A
8395	PIP5K1B
1301	COL11A1
5228	PGF
23396	PIP5K1C
896	CCND3
30814	PLA2G2E
2353	FOS
973	CD79A
868	CBLB
369	ARAF
374	AREG
109	ADCY3
9064	MAP3K6
115727	RASGRP4
6404	SELPLG
993	CDC25A
701	BUB1B
890	CCNA2
991	CDC20
995	CDC25C
4085	MAD2L1
7272	TTK
8318	CDC45L
9232	PTTG1
699	BUB1
23594	ORC6L
1111	CHEK1
6241	RRM2
891	CCNB1
983	CDC2
9133	CCNB2
5347	PLK1
317	APAF1
3479	IGF1
8493	PPM1D
51512	GTSE1
3708	ITPR1
4313	MMP2
994	CDC25B
2767	GNA11
5136	PDE1A
4323	MMP14
5322	PLA2G5
4854	NOTCH3
84441	MAML2
1488	CTBP2
114548	NLRP3

## Sheet: GSEA.HCC
NAME	SIZE	ES	NES	NOM p-val	FDR q-val
hsa04060	208	-0.565462	-2.74642	0	0
hsa04630	115	-0.471022	-2.09138	0	0
hsa04110	103	0.639083	2.69014	0	0
hsa03320	56	-0.514848	-2.02038	0	0.00027
hsa04514	121	-0.451338	-2.02375	0	0.00036
hsa04062	155	-0.423437	-1.96357	0	0.000429
hsa04620	78	-0.424526	-1.76137	0.00278164	0.00368275
hsa04350	69	-0.398469	-1.62171	0.0041919	0.013636
hsa04115	59	0.399913	1.53181	0.0157398	0.0183543
hsa04662	65	-0.386486	-1.56227	0.00561535	0.020832
hsa04150	41	0.442553	1.55739	0.0176196	0.0209732
hsa04920	55	-0.39306	-1.52339	0.0130814	0.0288824
hsa04210	72	-0.361391	-1.48633	0.0201311	0.0354341
hsa04020	130	-0.318505	-1.44667	0.0080402	0.0456264
hsa04621	53	-0.368112	-1.42188	0.032539	0.0524672
hsa04010	215	-0.276398	-1.34476	0.015873	0.0803479
hsa04664	67	-0.335805	-1.35143	0.0546654	0.0819154
hsa04340	49	-0.360707	-1.36135	0.0556066	0.0820021
hsa04070	62	0.338195	1.29541	0.0855856	0.0987896
hsa04660	89	-0.305096	-1.30345	0.0645487	0.10406
hsa04310	122	-0.26713	-1.19344	0.120575	0.212352
hsa04330	41	0.30692	1.09281	0.309201	0.287128
hsa04912	83	-0.267626	-1.12653	0.220363	0.301813
hsa04510	167	-0.224819	-1.05622	0.309917	0.405159
hsa04370	63	-0.265043	-1.05785	0.346636	0.422304
hsa04012	75	-0.248838	-1.02116	0.40825	0.460918
hsa04910	116	-0.226135	-1.00926	0.436821	0.466186
hsa04512	75	-0.232545	-0.962839	0.530911	0.554707
hsa04622	43	-0.239185	-0.884373	0.674715	0.715188

## Sheet: LiteratureMining_HCC_gene
GeneSymbol	EntrezGene	Number of Abstracts the Gene Occurs
AFP	174	3874
HCCS	3052	2672
TP53	7157	1328
PRO1341	213	1145
ILPR	3630	768
PCNA	5111	683
GPT	2875	526
HSPG2	3339	518
HGF	3569	517
VEGFA	7422	513
TNF	7124	494
CASP3	836	454
TGFB1	7040	435
IFNA1	3439	427
NFKB1	4790	399
BCL2	596	382
CTNNB1	1499	378
MYC	4609	364
EGF	1950	350
AKT1	207	343
LPA	4018	316
ROS1	6098	285
IFNG	3458	263
HGF	3082	260
CCND1	595	246
ODZ1	10178	242
CDKN2A	1029	222
IL2	3558	220
PRO2086	7018	215
MMP2	4313	210
EGFR	1956	209
MMP9	4318	203
STAT3	6774	202
SLC25A3	5250	200
IL1F6	27179	195
IGF2	3481	193
TCEAL1	9338	188
SLC17A5	26503	182
PLG	5340	181
CD4	920	176
JUN	3725	174
PTGS2	5743	167
HIF1A	3091	164
DCP	1636	163
IL1B	3553	161
BCL2L1	598	157
KRAS	3845	149
MAPK8	5599	146
HNF4A	3172	144
DUOXA1	90527	140
TRT	7015	139
GPC3	2719	137
CATALASE	847	137
KRT19	3880	135
IGF1	3479	135
CD8A	925	134
CD34	947	133
HHF5	3643	132
AHR	196	132
EPO	2056	128
CYP1A1	1543	127
CASP8	841	125
CASP9	842	125
PPARA	5465	120
TGFA	7039	118
CD40LG	959	118
HGFR	4233	116
CLTC	1213	115
FHC	3949	115
HLA-E	3133	115
MVD	4597	114
ADM	133	114
PKC	50818	108
PTEN	5728	108
TYROSINE AMINOTRANSFERASE	6898	107
MAPK3	5595	106
IL10	3586	103
FLJ36605	7431	102
NAF	3576	98
ELANE	1991	97
APC	324	97
PPARG	5468	95
SETD2	29072	95
SOAT1	6646	93
SERPINE1	5054	93
HNF1A	6927	91
RB1	5925	90
EBP	10682	89
CO2	717	88
SLC26A3	1811	88
KRT7	3855	87
CYP2E1	1571	87
CISH	1154	86
SMUG1	23583	85
KDR	3791	82
CD44	960	81
HSPA4	3308	80
RAF1	5894	78
CCL4	6351	77
CDKN1A	1026	77
SPP1	6696	77
MMRN1	22915	77
SMST	6750	76
CNR	1268	75
SERPINA1	5265	75
ADC	113451	72
HRAS	3265	72
AGT	183	71
AIS	367	71
ABCB1	5243	70
CDK4	1019	69
CCL16	6360	69
HFE	3077	69
IRF6	3664	68
IL4	3565	68
ICAM1	3383	68
ABCB6	10058	67
ERVWE1	30816	67
PTK2	5747	65
HPA1S	3240	64
HCA	266790	64
PROM1	8842	64
DNAH8	1769	63
STAT1	6772	62
GAPDH	2597	61
ABCD1	215	60
CEBPB	1051	60
GSK3B	2932	60
HLF	3131	60
HTC2	3342	60
MDM2	4193	59
CEBPA	1050	59
XIAP	331	59
EXT1	2131	59
CDK2	1017	59
CRP	1401	58
IFNB1	3456	57
AKR1B1	231	57
COL18A1	80781	56
TFR	7037	56
SOD2	6648	56
DNS	1243	55
FOXM1	2305	55
NUDT6	11162	55
CYP1A2	1544	55
XRCC1	7515	55
TH1L	51497	54
TIMP1	7076	54
RELA	5970	53
CSF2	1437	53
APOB	338	53
NEU1	4758	53
PLAU	5328	53
IRS1	3667	53
TNFRSF10B	8795	53
SERPINC1	462	52
NFKBIA	4792	52
FASL	356	52
EPCAM	4072	51
TTR	7276	51
GLUL	2752	50
HSPA5	3309	50
GSTP1	2950	50
IGF1R	3480	50
PCK2	5106	50
DECR1	1666	50
HDAC9	9734	50
PRDX2	7001	49
RASSF1	11186	49
HLP	1576	49
MCL1	4170	49
DDX41	51428	49
MAPK10	5602	49
ESR	2099	48
HBE1	3046	48
IFNA2	3440	48
PPIG	9360	48
LEP	3952	48
E2F1	1869	47
HMOX1	3162	46
IGFBP1	3484	46
SMAD3	4088	46
KRT122P	85348	44
BSG	682	44
KRT18	3875	43
MAT1A	4143	43
FAH	2184	43
CD81	975	43
TFPI	7035	43
ALDH9A1	223	43
ACTB	60	42
RTEL1	51750	42
TIMP2	7077	42
DERL2	51009	41
AKR1A1	10327	41
SSI1	8651	41
CONNEXIN	100128922	41
OPN1SW	611	41
SLC2A1	6513	40
CD80	941	40
KRT8	3856	40
WDTC1	23038	40
CP2	1356	39
IGFBP3	3486	39
CD86	942	39
SLC25A1	6576	39
PRKCA	5578	38
MIB1	57534	38
ERBB2	2064	38
BAK1	578	38
SMAD4	4089	38
FOXP3	50943	38
TXN	7295	38
PTH	5741	38
IL1A	3552	37
HPSE	10855	37
RFS	65211	37
LIF	3976	37
IL6R	3570	37
FGF2	2247	37
RHOA	387	36
RXRA	6256	36
DLC1	10395	36
SLC3A2	6520	36
GJB1	2705	35
NEP	4311	35
HM89	7852	35
G6PD	2539	35
CD56	4684	35
DNMT1	1786	35
EP300	2033	35
MAP2K1	5604	35
CCNB1	891	35
NOVA2	4858	35
ASV	6714	35
MMP1	4312	35
ARID4B	51742	34
FUT1	2523	34
ADIPOQ	9370	34
VTN	7448	34
MYCN	4613	33
MUC7	4589	33
MMP14	4323	33
CCL2	6347	33
FAS	355	33
CSF3	1440	33
SSI3	9021	32
FAP	2191	32
SAR	8856	32
UROD	7389	32
SMN1	6606	32
MTG1	92170	32
JAG1	182	32
HDAC1	3065	31
GOLM1	51280	31
GSTM1	2944	31
ARHGAP24	83478	31
CYP27B1	1594	31
MUC1	4582	30
FOXA2	3170	30
APP	351	30
AIFM1	9131	30
AAVS1	17	30
GJA1	2697	30
YWHAZ	7534	30
IL18	3606	30
SMAD2	4087	29
TNS1	7145	29
GPC1	2817	29
EGR1	1958	29
CCL5	6352	29
CD40	958	29
CCL14	6358	28
GHR	2690	28
PDGFRB	5159	28
NQO1	1728	28
FLT1	2321	28
SCARB1	949	28
SREBF1	6720	28
HSP90B2P	7190	28
GSR	2936	27
FUCA1	2517	27
LBR	3930	27
PBT	3815	27
MAPK1	5594	27
DES	1674	27
SERPINA7	6906	27
CAV1	857	27
JAK2	3717	27
SDS	10993	27
PRL	5617	27
TNFRSF10A	8797	27
SARNP	84324	27
SHC3	53358	27
HAMP	57817	27
IGA	973	26
CXCL12	6387	26
MT1E	4493	26
GNMT	27232	26
DDIT3	1649	26
ACTA1	58	26
ANTXR2	118429	26
DPYD	1806	26
TLR4	7099	26
SHBG	6462	25
MSMP	692094	25
IGF2R	3482	25
H19	283120	25
MMP3	4314	25
RPS6KB1	6198	25
IGKV2D-29	28882	25
NR1H4	9971	25
ATM	472	24
DNMT3B	1789	24
ABCA1	19	24
CDKN2B	1030	24
PSMD10	5716	24
ITGB1	3688	24
CREB1	1385	24
ARO	1588	24
ERB	2100	24
IL24	11009	24
MGMT	4255	24
K20	54474	24
MAT2A	4144	23
CCR1	1230	23
BCKDHB	594	23
FBN2	2201	23
CDK1	983	23
FASN	2194	23
KLF6	1316	23
CADM1	23705	23
RAC1	5879	23
SLC25A10	1468	23
LPL	4023	23
SLC4A1	6521	23
NT5C2	22978	23
RAPH1	65059	22
CXCL10	3627	22
CD68	968	22
CD14	929	22
SYNM	23336	22
THY1	7070	22
MAA	4080	22
ASGR1	432	21
CTGF	1490	21
IRF1	3659	21
JAK1	3716	21
MGAT5	4249	21
IL28C	282617	21
RUNX3	864	21
TIMM8A	1678	21
SPO	4025	21
GLI2	2736	21
ENT	4907	21
PGRMC1	10857	21
CTX	1593	21
BECN1	8678	21
CDH1	999	21
PGCP	10404	21
MIR21	406991	21
HDL3	53369	21
SLC10A1	6554	21
ASGR2	433	21
TYMP	1890	20
CSF1	1435	20
MLH1	4292	20
MDK	4192	20
HPX	3263	20
BBS9	27241	20
TERC	7012	20
HK2	3099	20
ABL	4547	20
GSTT1	2952	20
FHIT	2272	20
AHSG	197	20
NOTCH1	4851	20
CLDN7	1366	20
RIT2	6014	20
CCS	9973	19
SKP2	6502	19
OTC	5009	19
ATP7B	540	19
PPP2R4	5524	19
GCK	2645	19
BLVRB	645	19
LTA	4049	19
RGN	9104	19
ABCC3	8714	19
SMAC	56616	19
KMT6	2146	19
HMI	3160	19
THBS1	7057	19
KITLG	4254	19
GGT1	2678	19
FAM20C	56975	19
DR1	1810	18
MMP7	4316	18
AMBP	259	18
MAMLD1	10046	18
HLA-A	3105	18
OSM	5008	18
DBP	1628	18
CD274	29126	18
SLC5A5	6528	18
SLC45A2	51151	18
SERPINA3	12	18
FOXO1	2308	18
FADD	8772	18
FOS	2353	18
PKU	5053	18
CDAN1	146059	17
GNLY	10578	17
NAAA	27163	17
TGFB2	7042	17
IKBKB	3551	17
VIPR1	7433	17
HBB	3043	17
THPO	7066	17
NME1	4830	17
CREM	1390	17
STN	1177	17
CCL3	6348	17
ABCC1	4363	17
MIF	4282	17
TIM1	26762	17
ID1	3397	17
PGR	5241	17
UGT1A1	54658	17
PTPRE	5791	17
WT1	7490	17
G6PC	2538	17
PEG10	23089	17
F10	2159	17
HSPD1	3329	17
ABCB4	5244	17
KLRK1	22914	17
TLR3	7098	16
CTAG1B	1485	16
VCAM1	7412	16
ESRRB	2103	16
AXIN1	8312	16
AIC	192	16
FEZF2	55079	16
SMAD7	4092	16
SHP	8431	16
FNRA	3678	16
VHL	7428	16
ACR	49	16
LCAT	3931	16
CFLAR	8837	16
HDGF	3068	16
DDT	1652	16
SERPINF2	5345	16
ANGPT2	285	16
LC27	55353	16
SYP	6855	16
FABP1	2168	16
SOS1	6654	16
UBE2B	7320	16
OGG1	4968	16
VEGFC	7424	16
SERPINF1	5176	16
B2M	567	16
CYP7A1	1581	16
MLC1	23209	16
CD83	9308	16
AVP	551	16
SOD1	6647	16
CLDN11	5010	16
POMC	5443	15
ALDH2	217	15
SCD	6319	15
PIK3CG	5294	15
CYLD	1540	15
HBEGF	1839	15
COPS5	10987	15
MTX1	4580	15
PI3	5266	15
FLT3	2322	15
TIMP3	7078	15
CLU	1191	15
CDK6	1021	15
MGAT3	4248	15
NR1H3	10062	15
HSP90AA1	3320	15
GADD45B	4616	15
AES	166	15
MIP	4284	15
GLI1	2735	15
F8C	2157	15
KLF2	10365	15
ANXA2	302	15
EDN1	1906	15
TFR2	7036	15
PLK1	5347	15
CNBP	7555	15
FLT4	2324	15
MB67	9970	15
FOXA1	3169	15
EPHA3	2042	15
SEC14L2	23541	15
DUSP1	1843	14
MIR221	407006	14
CYP1B1	1545	14
A2M	2	14
PCA	559	14
ACACA	31	14
TBP	6908	14
XBP1	7494	14
TWSG1	57045	14
CYP2D6	1565	14
BCR	613	14
THM	7063	14
GDF15	9518	14
CCR5	1234	14
XDH	7498	14
PML	5371	14
FGFR4	2264	14
ABO	28	14
NR5A2	2494	14
PRDM2	7799	14
CASP1	834	14
MSH2	4436	14
FGFR2	2263	14
CASR	846	14
F12	2161	14
VWF	7450	14
ETS1	2113	14
UBASH3B	84959	14
APCS	325	14
RHOC	389	14
RARB	5915	14
APOE	348	14
CTS1	1507	14
ABCA4	24	14
TYK2	7297	14
IGKV6D-21	28870	14
EPAS1	2034	13
GPX1	2876	13
DDC	1644	13
CDC42	998	13
PPARGC1A	10891	13
TEK	7010	13
PPK	2706	13
HIST4H4	121504	13
A 4	3476	13
GLS	2744	13
PHB	5245	13
ENG	2022	13
TLR2	7097	13
DSG3	1830	13
PHIP	55023	13
DLGAP5	9787	13
CD2	914	13
FPF	7132	13
HPRT1	3251	13
PXN	5829	13
AKR1B10	57016	13
SREBF2	6721	13
IL11	3589	13
TYMS	7298	13
CCND2	894	13
CSE	1433	13
CTNNA1	1495	13
EIF4EBP1	1978	13
ZNF331	55422	13
SPINK1	6690	13
NPC1	4864	13
STAT2	6773	13
MCR	4306	13
CSO	1403	13
FDP	56914	13
GFER	2671	13
IL3	3562	12
SRL	6345	12
LGALS4	3960	12
CASP12	120329	12
ATF6	22926	12
CASP2	835	12
ARHGAP1	392	12
DNMT3A	1788	12
NR1H2	7376	12
NPM1	4869	12
P80	3554	12
CLIC4	25932	12
PRS	5640	12
TGN	7038	12
GPI	2821	12
NDRG1	10397	12
TCFL5	10732	12
PGF	5228	12
ING1	3621	12
EZR	7430	12
MBP	4155	12
REG3A	5068	12
SDGF	374	12
TCF7L2	6934	12
IGKV3-31	28910	12
CSTB	1476	12
LIPA	3988	12
ABCG2	9429	12
POU5F1	5460	12
APN	290	12
LEPR	3953	12
PTHLH	5744	12
CENPK	64105	12
ASL	435	12
CYP2B6	1555	12
ALC	55821	12
SLC2A2	6514	12
MIR122	406906	12
OCLN	4950	12
PTPN11	5781	12
CD24	100133941	12
PDIK1L	149420	12
CGA	1081	12
AFM	173	12
MAPK9	5601	12
CDC25A	993	12
BDNF	627	12
FGFR1	2260	12
CHEK1	1111	12
EIF2S1	1965	12
DCC	1630	11
UBD	10537	11
CCT4	10575	11
ARG1	383	11
PDX1	3651	11
CDC25C	995	11
BRCA2	675	11
CRYZ	1429	11
ARNT	405	11
TPO	7173	11
CETP	1071	11
CCL20	6364	11
RAPGEF5	9771	11
MAP1LC3A	84557	11
CD69	969	11
SMYD3	64754	11
WNT1	7471	11
SORD	6652	11
CD36	948	11
EFS	10278	11
ADENOSINE DEAMINASE	100	11
LCA	5788	11
TYRP1	7306	11
PSCP	672	11
PDGFRA	5156	11
SHC1	6464	11
SFRP1	6422	11
CVID	23495	11
TGM2	7052	11
RD7	10002	11
GPR9	2833	11
ALDH7A1	501	11
BRAF	673	11
CTLA4	1493	11
SSTR2	6752	11
ATP2C1	27032	11
CASP7	840	11
NKX2-1	7080	11
AURKA	6790	11
PDGFB	5155	11
EVL	51466	11
PTCH1	5727	11
UGT1A7	54577	11
NF1	4763	11
MX1	4599	11
REN	5972	11
CYP2C9	1559	11
CTSB	1508	11
SULF1	23213	11
ERBB3	2065	11
NAT2	10	11
SULT2A1	6822	11
NTS	4922	11
CDX2	1045	11
POLA1	5422	11
ATG5	9474	11
IL15	3600	11
DCE	1631	11
GRB2	2885	11
PDLIM5	10611	10
MIA	8190	10
PRKG1	5592	10
STS	412	10
DNTT	1791	10
LAMC2	3918	10
CLA	6404	10
HMGCR	3156	10
CD28	940	10
CRTC1	23373	10
PTK2B	2185	10
ENPP3	5169	10
ATF2	1386	10
PEBP1	5037	10
MAGEA3	4102	10
HTATIP2	10553	10
GNRH1	2796	10
ATR	545	10
ZNF77	58492	10
GFAP	2670	10
EPHA1	2041	10
FGF19	9965	10
CDH17	1015	10
NF2	4771	10
CCL21	6366	10
PGS	5242	10
ONECUT1	3175	10
NLRP3	114548	10
CD1A	909	10
HNF1B	6928	10
DSP	1832	10
LGALS3	3958	10
MTHFR	4524	10
CABIN1	23523	10
DPEP1	1800	10
SIAH1	6477	10
MMP13	4322	10
MAGEA4	4103	10
HPN	3249	10
TRIT1	54802	10
PPOX	5498	10
