# Supplementary material for: Inferring pathway crosstalk networks using gene set co-expression signatures
Source: Royal Society of Chemistry journal article supplement (doi:10.1039/c3mb25506a), 2013-03-21
Supplement: c3mb25506a_4.xlsx [file c3mb25506a_4.xlsx]

## Sheet: ttest_remaining_gene.lungC
gene	t-score	pvalue	fdr
762	-19.1765	4.96788e-27	1.44965e-23
2823	-18.8459	1.20297e-26	1.74944e-23
6711	-18.6767	1.89998e-26	1.84808e-23
100131848	-18.4947	3.1167e-26	2.13241e-23
9806	-18.3779	4.2893e-26	2.28231e-23
177	-18.3175	5.06246e-26	2.34935e-23
344148	-18.2713	5.74738e-26	2.39587e-23
219790	-18.122	8.67919e-26	3.16578e-23
51280	17.4201	6.22032e-25	1.6765e-22
22898	-17.4098	6.40624e-25	1.71109e-22
338328	-17.3585	7.4131e-25	1.88811e-22
6748	17.238	1.04614e-24	2.33622e-22
8507	17.2331	1.06087e-24	2.35509e-22
11170	-17.1836	1.22284e-24	2.54879e-22
94	-17.0867	1.61606e-24	2.97984e-22
256949	-17.0406	1.8455e-24	3.1883e-22
55101	-17.0363	1.86905e-24	3.20822e-22
54922	-16.9614	2.32101e-24	3.76267e-22
285313	-16.8601	3.11348e-24	4.68705e-22
147372	-16.8232	3.46638e-24	5.05753e-22
6445	-16.6928	5.07332e-24	7.04961e-22
132299	16.5014	8.90291e-24	1.15349e-21
10391	-16.4583	1.011e-23	1.28257e-21
5831	16.3833	1.26215e-23	1.53458e-21
79567	-16.159	2.45999e-23	2.738e-21
54538	-16.1528	2.50655e-23	2.78068e-21
1300	16.1061	2.88267e-23	3.11547e-21
8676	-15.8611	6.02595e-23	6.09732e-21
1901	-15.7886	7.50495e-23	7.37264e-21
2524	15.7397	8.7066e-23	8.35537e-21
10974	-15.6609	1.10675e-22	1.01596e-20
51751	-15.6503	1.14295e-22	1.04224e-20
140706	-15.4805	1.92177e-22	1.54806e-20
26084	-15.4499	2.1114e-22	1.65385e-20
7123	-15.4241	2.28612e-22	1.74629e-20
146894	-15.4218	2.30241e-22	1.75467e-20
7134	-15.4122	2.37118e-22	1.78964e-20
863	-15.4038	2.43287e-22	1.82045e-20
2327	-15.4038	2.4334e-22	1.82071e-20
4311	-15.3479	2.89127e-22	2.03391e-20
6886	-15.3421	2.94292e-22	2.05637e-20
257019	-15.3373	2.98707e-22	2.07533e-20
80177	-15.2749	3.62259e-22	2.42044e-20
9365	-15.2366	4.07972e-22	2.65276e-20
11095	-15.2101	4.42838e-22	2.82175e-20
90952	-15.2045	4.50621e-22	2.85855e-20
400120	-15.1277	5.72209e-22	3.42659e-20
5787	-15.122	5.82365e-22	3.47117e-20
1910	-15.121	5.84299e-22	3.47961e-20
64115	-15.0827	6.5822e-22	3.84143e-20
83595	-15.0145	8.14621e-22	4.61026e-20
23645	-14.9492	9.99382e-22	5.46059e-20
641700	-14.928	1.0681e-21	5.76205e-20
7010	-14.8694	1.28424e-21	6.66232e-20
2167	-14.8617	1.31577e-21	6.78793e-20
57514	-14.8323	1.4433e-21	7.28197e-20
10266	-14.8319	1.44521e-21	7.28919e-20
1945	14.8265	1.46968e-21	7.38145e-20
161198	-14.7776	1.71503e-21	8.26533e-20
375033	-14.7741	1.73388e-21	8.3303e-20
1003	-14.7693	1.76028e-21	8.4206e-20
23423	14.6761	2.36388e-21	1.10977e-19
10268	-14.5303	3.75756e-21	1.69142e-19
5832	14.5265	3.80361e-21	1.70983e-19
10044	-14.4879	4.30243e-21	1.90601e-19
152273	-14.385	5.97987e-21	2.52592e-19
7122	-14.3771	6.13304e-21	2.57967e-19
1636	-14.3574	6.53345e-21	2.71804e-19
115908	14.3308	7.11633e-21	2.91415e-19
3777	-14.3195	7.37994e-21	3.00083e-19
57513	-14.3162	7.45936e-21	3.02671e-19
23336	-14.2957	7.96747e-21	3.18972e-19
445815	-14.248	9.28973e-21	3.59419e-19
627	-14.2216	1.01166e-20	3.83362e-19
23328	-14.2175	1.02507e-20	3.8715e-19
79017	14.202	1.07771e-20	4.0179e-19
395	-14.1946	1.10386e-20	4.08922e-19
53826	-14.1814	1.15188e-20	4.21787e-19
55679	-14.1669	1.20695e-20	4.36177e-19
343450	-14.1581	1.24196e-20	4.45134e-19
9037	-14.152	1.26686e-20	4.51413e-19
6943	-14.1506	1.27246e-20	4.52815e-19
11069	-14.1261	1.37752e-20	4.82972e-19
79812	-14.1116	1.44363e-20	5.01496e-19
54732	14.0538	1.74162e-20	5.92941e-19
2294	-14.0104	2.00507e-20	6.70802e-19
150378	-13.9952	2.10702e-20	7.00212e-19
8612	13.985	2.17833e-20	7.20553e-19
400506	13.9663	2.31484e-20	7.58967e-19
29091	-13.9196	2.69637e-20	8.69068e-19
9413	-13.8583	3.29482e-20	1.03444e-18
85358	-13.8381	3.51908e-20	1.09422e-18
64397	-13.7872	4.1593e-20	1.25874e-18
116835	-13.7717	4.3761e-20	1.31248e-18
9079	-13.746	4.7611e-20	1.40556e-18
23287	-13.7431	4.80642e-20	1.41633e-18
64321	-13.7427	4.81304e-20	1.4179e-18
51705	-13.725	5.10257e-20	1.48572e-18
59350	-13.7017	5.50949e-20	1.57841e-18
7056	-13.6887	5.75016e-20	1.63185e-18
7049	-13.6821	5.87619e-20	1.65943e-18
443	-13.6703	6.10948e-20	1.70977e-18
8714	13.6694	6.12756e-20	1.71364e-18
79834	-13.6661	6.19511e-20	1.72803e-18
115330	-13.6337	6.89265e-20	1.87236e-18
3384	-13.6314	6.94641e-20	1.88317e-18
55974	13.6308	6.96001e-20	1.8859e-18
6696	13.6275	7.03657e-20	1.9012e-18
58494	-13.6151	7.3304e-20	1.96227e-18
64411	-13.6002	7.70081e-20	2.03767e-18
2890	-13.5859	8.07266e-20	2.11163e-18
9754	-13.5791	8.25605e-20	2.14748e-18
23235	-13.5619	8.7407e-20	2.24033e-18
84991	-13.5516	9.0434e-20	2.29696e-18
57188	-13.5505	9.07639e-20	2.30307e-18
23294	-13.5011	1.06916e-19	2.64512e-18
55321	-13.4857	1.12523e-19	2.75991e-18
51248	13.4805	1.14496e-19	2.79982e-18
948	-13.451	1.26265e-19	3.03302e-18
2078	-13.4424	1.29963e-19	3.1046e-18
10894	-13.4405	1.30762e-19	3.11995e-18
150696	13.4226	1.38784e-19	3.2722e-18
84701	-13.4145	1.4258e-19	3.343e-18
51267	-13.3909	1.54267e-19	3.55608e-18
63876	-13.39	1.54699e-19	3.5638e-18
80761	-13.3877	1.55905e-19	3.58536e-18
80014	-13.3858	1.56898e-19	3.60306e-18
133619	13.3707	1.64979e-19	3.74516e-18
54674	-13.3662	1.67481e-19	3.78849e-18
10284	-13.3354	1.85646e-19	4.14007e-18
196883	-13.3183	1.96529e-19	4.346e-18
28513	-13.3096	2.02354e-19	4.45479e-18
2995	-13.3031	2.06786e-19	4.53692e-18
79586	13.2606	2.38369e-19	5.14887e-18
29931	-13.2591	2.39563e-19	5.17165e-18
79622	13.2439	2.52084e-19	5.40877e-18
8436	-13.2045	2.87717e-19	6.09543e-18
5175	-13.1756	3.17047e-19	6.64775e-18
7075	-13.1621	3.31769e-19	6.92074e-18
23266	-13.1552	3.39636e-19	7.06547e-18
115572	-13.1359	3.62412e-19	7.48004e-18
81849	-13.1027	4.0519e-19	8.24133e-18
9768	13.0855	4.29392e-19	8.66232e-18
55526	13.08	4.37474e-19	8.80139e-18
219348	-13.0664	4.57948e-19	9.15029e-18
857	-13.0655	4.5947e-19	9.17603e-18
79053	13.0479	4.87454e-19	9.64481e-18
9245	13.0357	5.08024e-19	9.9839e-18
23460	-13.0159	5.43157e-19	1.05526e-17
116159	-13.0104	5.53291e-19	1.07142e-17
285016	-12.9956	5.81821e-19	1.11636e-17
100129405	12.9728	6.28557e-19	1.18822e-17
2791	-12.9653	6.44549e-19	1.21233e-17
256435	-12.9633	6.48962e-19	1.21894e-17
1316	-12.9582	6.60303e-19	1.23584e-17
147463	-12.9573	6.62327e-19	1.23884e-17
84326	12.9484	6.8266e-19	1.26881e-17
5738	12.9187	7.54869e-19	1.3865e-17
27347	12.9036	7.94811e-19	1.45042e-17
168667	-12.8696	8.92131e-19	1.60275e-17
4855	-12.8667	9.00831e-19	1.61614e-17
2013	-12.8574	9.29861e-19	1.66054e-17
10401	12.853	9.43899e-19	1.68187e-17
7450	-12.8397	9.87454e-19	1.74744e-17
149832	-12.8379	9.93459e-19	1.75641e-17
51277	-12.8033	1.11788e-18	1.93853e-17
25928	-12.7923	1.16053e-18	1.99937e-17
3040	-12.7899	1.17025e-18	2.01312e-17
57493	-12.7752	1.23039e-18	2.09732e-17
23753	12.7676	1.26256e-18	2.14172e-17
1602	-12.745	1.36403e-18	2.27903e-17
1382	12.7439	1.36918e-18	2.2859e-17
3145	12.7386	1.39381e-18	2.31855e-17
154	-12.7357	1.40813e-18	2.33743e-17
23284	-12.733	1.42081e-18	2.35408e-17
54432	12.7296	1.43758e-18	2.376e-17
79413	-12.7261	1.45482e-18	2.39843e-17
23359	-12.6911	1.63966e-18	2.67414e-17
1906	-12.6898	1.64728e-18	2.68538e-17
7162	12.654	1.86206e-18	3.0033e-17
22918	-12.6482	1.89918e-18	3.05755e-17
9068	-12.6276	2.03886e-18	3.25996e-17
80760	-12.6197	2.09457e-18	3.33991e-17
2273	-12.5604	2.56818e-18	4.0111e-17
9601	12.5552	2.61425e-18	4.07492e-17
387758	-12.5449	2.70849e-18	4.20468e-17
6237	-12.5297	2.85392e-18	4.40287e-17
7111	-12.5118	3.03603e-18	4.6476e-17
28984	-12.4923	3.24642e-18	4.92567e-17
5334	-12.4818	3.36637e-18	5.08202e-17
8322	-12.4751	3.44529e-18	5.18403e-17
9452	-12.4715	3.48845e-18	5.23953e-17
51809	12.4654	3.56177e-18	5.33337e-17
27324	12.4567	3.67039e-18	5.47132e-17
155038	-12.442	3.86167e-18	5.71129e-17
1674	-12.4379	3.91749e-18	5.78061e-17
728932	12.4335	3.97768e-18	5.855e-17
91433	12.4293	4.03591e-18	5.92662e-17
474344	-12.4262	4.07935e-18	5.97983e-17
1036	-12.4058	4.37697e-18	6.33939e-17
57576	-12.3946	4.54958e-18	6.54402e-17
64951	12.3747	4.87462e-18	6.92179e-17
92312	12.3742	4.88278e-18	6.93114e-17
79783	12.35	5.31056e-18	7.41351e-17
9131	12.348	5.34675e-18	7.4536e-17
79833	12.3424	5.45235e-18	7.5699e-17
64651	-12.3418	5.46387e-18	7.58252e-17
8692	-12.3273	5.74553e-18	7.88788e-17
200010	-12.3251	5.78941e-18	7.93487e-17
5348	-12.3246	5.7997e-18	7.94586e-17
26063	12.3237	5.81685e-18	7.96417e-17
116028	12.3149	5.99747e-18	8.15553e-17
2277	-12.3114	6.07042e-18	8.23207e-17
33	-12.3103	6.09443e-18	8.25718e-17
8613	-12.3046	6.21525e-18	8.38281e-17
8547	-12.3021	6.26967e-18	8.43903e-17
10549	12.2961	6.40107e-18	8.57383e-17
284654	-12.2953	6.41886e-18	8.59199e-17
1001	12.2867	6.61364e-18	8.79064e-17
90161	12.2832	6.69426e-18	8.87205e-17
751867	12.2788	6.79849e-18	8.9766e-17
79825	-12.2694	7.02479e-18	9.21386e-17
92344	12.2624	7.19818e-18	9.39353e-17
6456	-12.26	7.25842e-18	9.45553e-17
7873	12.2516	7.4728e-18	9.67809e-17
11014	12.2473	7.58507e-18	9.79362e-17
728554	12.2188	8.37626e-18	1.06438e-16
3149	12.2068	8.73529e-18	1.10208e-16
51763	-12.2064	8.74627e-18	1.10323e-16
5420	-12.2048	8.79443e-18	1.10824e-16
53405	-12.2039	8.82226e-18	1.11114e-16
199675	-12.191	9.22911e-18	1.15307e-16
5050	12.186	9.39076e-18	1.16954e-16
57171	12.1816	9.53595e-18	1.18425e-16
2824	-12.1814	9.54249e-18	1.18491e-16
203190	-12.1699	9.93535e-18	1.22497e-16
55698	-12.1584	1.03391e-17	1.26556e-16
7466	-12.1513	1.06004e-17	1.2915e-16
22885	-12.1489	1.06887e-17	1.30022e-16
400568	-12.1468	1.07695e-17	1.30817e-16
91663	-12.1397	1.1037e-17	1.33434e-16
285025	-12.1229	1.17038e-17	1.39849e-16
2662	-12.1168	1.1959e-17	1.42266e-16
154810	-12.1126	1.21329e-17	1.439e-16
54438	-12.1119	1.21627e-17	1.44179e-16
3730	-12.1068	1.23816e-17	1.4622e-16
8839	-12.1023	1.2579e-17	1.48048e-16
57519	-12.102	1.25943e-17	1.48189e-16
9590	-12.091	1.30883e-17	1.53221e-16
10651	12.0802	1.3592e-17	1.58299e-16
26628	-12.0732	1.39284e-17	1.61662e-16
2534	-12.0685	1.41587e-17	1.63952e-16
285812	-12.0494	1.51396e-17	1.73957e-16
11130	12.0468	1.52774e-17	1.7535e-16
9500	12.0397	1.56607e-17	1.79211e-16
9314	-12.0212	1.67125e-17	1.89916e-16
80704	-12.0191	1.68388e-17	1.91192e-16
643733	-12.0023	1.78619e-17	2.01501e-16
85463	-11.9911	1.85756e-17	2.08615e-16
1650	11.9842	1.90287e-17	2.13099e-16
55273	-11.9719	1.98708e-17	2.21364e-16
653110	-11.9636	2.04566e-17	2.27063e-16
4810	11.9577	2.08901e-17	2.31253e-16
1410	-11.9462	2.17481e-17	2.39482e-16
56967	-11.9403	2.2211e-17	2.43885e-16
7145	-11.9383	2.23642e-17	2.45337e-16
6509	11.9247	2.34582e-17	2.55873e-16
29089	11.9142	2.43413e-17	2.64291e-16
29953	-11.9122	2.45191e-17	2.65977e-16
4499	-11.8932	2.62104e-17	2.81858e-16
8835	-11.8893	2.65728e-17	2.85225e-16
1675	-11.8841	2.70696e-17	2.89821e-16
84740	11.8802	2.74402e-17	2.93234e-16
185	-11.8694	2.85067e-17	3.02985e-16
2247	-11.8516	3.036e-17	3.1968e-16
2615	-11.8486	3.06773e-17	3.22507e-16
1804	-11.8414	3.14667e-17	3.29502e-16
2118	11.82	3.39385e-17	3.51053e-16
8727	-11.8199	3.39568e-17	3.5121e-16
9647	-11.8103	3.512e-17	3.61169e-16
63875	11.7977	3.67238e-17	3.74715e-16
388722	11.7975	3.67531e-17	3.74961e-16
57415	11.7965	3.68738e-17	3.75971e-16
26073	11.7955	3.70054e-17	3.77072e-16
79602	-11.7826	3.87362e-17	3.91417e-16
128272	11.78	3.90898e-17	3.94318e-16
728113	-11.7792	3.9212e-17	3.95319e-16
1611	11.7786	3.92935e-17	3.95984e-16
7922	11.7783	3.93317e-17	3.96297e-16
5797	-11.7763	3.96119e-17	3.98584e-16
10186	-11.7583	4.22145e-17	4.20391e-16
11185	-11.7506	4.33773e-17	4.2999e-16
347735	11.7448	4.42876e-17	4.37442e-16
57608	-11.7344	4.59501e-17	4.50917e-16
220213	-11.7269	4.71938e-17	4.60884e-16
79839	-11.7256	4.7403e-17	4.62551e-16
3043	-11.7249	4.75247e-17	4.6352e-16
6532	-11.7192	4.84837e-17	4.7112e-16
4833	11.7187	4.85849e-17	4.71918e-16
2015	-11.7183	4.86419e-17	4.72368e-16
57477	-11.7158	4.90858e-17	4.75863e-16
64754	11.6902	5.37508e-17	5.14588e-16
29968	11.6824	5.52504e-17	5.26833e-16
2701	-11.6805	5.5633e-17	5.29942e-16
196383	-11.6674	5.82842e-17	5.51308e-16
145781	-11.6611	5.95993e-17	5.61796e-16
1469	11.6556	6.07843e-17	5.71184e-16
23623	11.6552	6.08687e-17	5.71851e-16
401093	-11.6551	6.08812e-17	5.7195e-16
130733	-11.6489	6.2246e-17	5.82685e-16
100127983	-11.6453	6.30515e-17	5.88985e-16
25803	11.6431	6.3534e-17	5.92746e-16
221687	-11.6377	6.47715e-17	6.0235e-16
284119	-11.6331	6.58389e-17	6.10583e-16
9060	-11.6285	6.69147e-17	6.18836e-16
8508	11.624	6.7999e-17	6.27108e-16
85450	-11.6203	6.89115e-17	6.34034e-16
1281	11.6147	7.02905e-17	6.44438e-16
2776	-11.6112	7.11759e-17	6.5108e-16
4239	-11.6031	7.3262e-17	6.67097e-16
7704	-11.5934	7.58413e-17	6.867e-16
51208	-11.5823	7.88853e-17	7.09553e-16
8462	-11.5737	8.13418e-17	7.27777e-16
976	-11.5706	8.22443e-17	7.34424e-16
84945	-11.5689	8.27527e-17	7.38157e-16
55340	-11.5677	8.31027e-17	7.40722e-16
5583	-11.5657	8.36898e-17	7.45016e-16
51294	-11.5624	8.46993e-17	7.52375e-16
7058	11.5577	8.6104e-17	7.62562e-16
80833	-11.5554	8.68325e-17	7.67821e-16
23710	-11.5452	9.00295e-17	7.91568e-16
4831	11.5419	9.11134e-17	7.99558e-16
8395	-11.5394	9.19193e-17	8.05479e-16
148327	11.5318	9.44502e-17	8.25179e-16
27089	11.5115	1.01547e-16	8.80064e-16
3959	11.5043	1.04203e-16	9.00381e-16
1073	-11.4914	1.09101e-16	9.37532e-16
51554	-11.4851	1.11599e-16	9.56325e-16
149175	11.4843	1.11922e-16	9.58748e-16
7433	-11.4834	1.12267e-16	9.61329e-16
2532	-11.482	1.1285e-16	9.65696e-16
84981	-11.4713	1.17228e-16	9.98788e-16
153	-11.4539	1.24759e-16	1.05505e-15
1301	11.4536	1.24903e-16	1.05612e-15
64236	-11.4497	1.2666e-16	1.06911e-15
78992	11.4441	1.29213e-16	1.08793e-15
125	-11.4381	1.32051e-16	1.10873e-15
5166	-11.4221	1.39828e-16	1.16514e-15
6330	-11.4094	1.46351e-16	1.2118e-15
5138	-11.4051	1.48602e-16	1.22777e-15
1311	11.3969	1.53047e-16	1.25909e-15
54664	11.3956	1.53778e-16	1.26422e-15
3316	-11.3935	1.54926e-16	1.27226e-15
10908	-11.3878	1.58121e-16	1.29453e-15
1278	11.3818	1.61545e-16	1.31824e-15
4008	-11.3812	1.61906e-16	1.32074e-15
22899	-11.374	1.66122e-16	1.34971e-15
100129550	-11.3726	1.67012e-16	1.35579e-15
90780	11.3649	1.71696e-16	1.38766e-15
126393	-11.3624	1.73221e-16	1.39797e-15
51053	11.3598	1.74849e-16	1.40895e-15
134265	-11.3592	1.75207e-16	1.41136e-15
80223	-11.3557	1.77412e-16	1.42616e-15
221303	-11.3453	1.84186e-16	1.47247e-15
4134	-11.3434	1.85479e-16	1.48125e-15
2054	-11.3403	1.87533e-16	1.49516e-15
347734	11.3273	1.96496e-16	1.55833e-15
2819	-11.327	1.96739e-16	1.56004e-15
28969	11.3035	2.14052e-16	1.68204e-15
128872	11.2977	2.18572e-16	1.71353e-15
23673	-11.2916	2.2344e-16	1.74727e-15
54491	-11.2883	2.2608e-16	1.76551e-15
100126326	-11.287	2.27159e-16	1.77294e-15
57381	-11.2812	2.31978e-16	1.80606e-15
283904	-11.2799	2.32985e-16	1.81296e-15
8908	11.2638	2.46904e-16	1.90927e-15
115677	-11.2606	2.49787e-16	1.92907e-15
57580	-11.2519	2.5775e-16	1.98349e-15
284889	11.2468	2.62534e-16	2.01601e-15
3764	-11.2434	2.65777e-16	2.03797e-15
9674	-11.2384	2.70625e-16	2.07068e-15
84262	11.2346	2.74339e-16	2.09563e-15
83648	-11.2218	2.87337e-16	2.18379e-15
3241	-11.2149	2.94504e-16	2.23202e-15
114789	-11.2049	3.05411e-16	2.3049e-15
57156	11.2046	3.05727e-16	2.307e-15
57407	11.1992	3.11735e-16	2.34688e-15
9846	-11.1968	3.14386e-16	2.36441e-15
3017	11.1908	3.21337e-16	2.41047e-15
3858	11.1719	3.43985e-16	2.56159e-15
131873	-11.1625	3.55874e-16	2.64005e-15
27255	-11.1606	3.58377e-16	2.65648e-15
79686	-11.1501	3.72238e-16	2.74705e-15
196410	11.1489	3.73904e-16	2.75788e-15
6403	-11.1475	3.75693e-16	2.7695e-15
139341	11.1466	3.76939e-16	2.77759e-15
645722	-11.1332	3.95716e-16	2.89943e-15
10058	11.13	4.00292e-16	2.92891e-15
6867	-11.1285	4.02447e-16	2.94276e-15
92162	-11.1074	4.34366e-16	3.14592e-15
51599	11.1013	4.44096e-16	3.20708e-15
6768	11.0998	4.46473e-16	3.22196e-15
55571	11.0992	4.47452e-16	3.22809e-15
3632	-11.0984	4.48826e-16	3.23668e-15
64798	11.0915	4.60179e-16	3.3074e-15
55118	-11.0882	4.65665e-16	3.3414e-15
1944	11.0866	4.6845e-16	3.35862e-15
2159	-11.0756	4.87482e-16	3.47567e-15
1839	-11.0657	5.05342e-16	3.58435e-15
84817	11.0634	5.09596e-16	3.61007e-15
11142	-11.0543	5.26656e-16	3.71257e-15
53342	-11.0497	5.355e-16	3.76531e-15
6368	-11.0487	5.37373e-16	3.77645e-15
10742	-11.0396	5.55395e-16	3.88299e-15
9467	-11.0326	5.69657e-16	3.96653e-15
3983	-11.0315	5.72031e-16	3.98036e-15
286205	-11.0296	5.76056e-16	4.00378e-15
1346	-11.0278	5.79804e-16	4.02554e-15
7203	11.0274	5.80666e-16	4.03054e-15
220965	-11.0267	5.81996e-16	4.03825e-15
80763	-11.024	5.87882e-16	4.07229e-15
51259	11.0068	6.25624e-16	4.28789e-15
27145	-11.0048	6.30308e-16	4.31432e-15
83879	11.0045	6.30923e-16	4.31779e-15
160622	-11.0033	6.33724e-16	4.33356e-15
220164	-11.003	6.34395e-16	4.33734e-15
25943	-10.9989	6.43898e-16	4.39064e-15
29128	10.9987	6.44414e-16	4.39353e-15
79960	-10.9916	6.612e-16	4.49079e-15
734	-10.9893	6.66867e-16	4.52346e-15
285736	-10.9817	6.8536e-16	4.62949e-15
57213	-10.975	7.02446e-16	4.72667e-15
4093	-10.9704	7.14195e-16	4.79306e-15
29926	10.9695	7.16463e-16	4.80583e-15
3579	-10.9632	7.33093e-16	4.89911e-15
57486	10.9582	7.46682e-16	4.97483e-15
124512	10.9427	7.89856e-16	5.21236e-15
2937	10.9412	7.9426e-16	5.23634e-15
7979	10.9402	7.97217e-16	5.25241e-15
2889	-10.9311	8.23941e-16	5.39672e-15
728358	-10.9297	8.28159e-16	5.41933e-15
23331	-10.9289	8.30837e-16	5.43368e-15
10938	-10.9238	8.4623e-16	5.51579e-15
124540	10.9228	8.4923e-16	5.53172e-15
3084	-10.9219	8.52074e-16	5.54681e-15
81607	10.9208	8.55697e-16	5.56602e-15
51185	-10.9155	8.7233e-16	5.65376e-15
23604	-10.9074	8.98534e-16	5.79072e-15
6526	10.9046	9.07645e-16	5.83798e-15
4005	-10.9041	9.093e-16	5.84654e-15
6715	10.904	9.09579e-16	5.84799e-15
84331	10.9027	9.13968e-16	5.87066e-15
170575	-10.898	9.29699e-16	5.95161e-15
65055	-10.8945	9.41706e-16	6.01303e-15
9811	-10.8907	9.54659e-16	6.07893e-15
10319	-10.8898	9.57954e-16	6.09563e-15
3048	-10.8886	9.6225e-16	6.11738e-15
374378	-10.8875	9.66127e-16	6.13697e-15
10131	10.8864	9.69901e-16	6.15601e-15
8270	10.8857	9.72483e-16	6.16902e-15
5034	10.8784	9.98573e-16	6.3112e-15
4192	10.8703	1.02866e-15	6.47385e-15
27147	-10.87	1.02984e-15	6.48022e-15
10209	-10.8638	1.05329e-15	6.606e-15
51205	10.8598	1.06883e-15	6.68893e-15
57556	-10.8579	1.07612e-15	6.72766e-15
11126	-10.8547	1.08896e-15	6.79575e-15
56920	-10.8531	1.09525e-15	6.82903e-15
858	-10.837	1.16151e-15	7.18895e-15
27293	10.8349	1.17065e-15	7.2382e-15
9457	-10.8247	1.21477e-15	7.47444e-15
90634	-10.8222	1.2259e-15	7.53367e-15
10471	10.818	1.24501e-15	7.63506e-15
10072	10.8154	1.25714e-15	7.69915e-15
3396	10.813	1.26807e-15	7.7568e-15
54480	10.8097	1.28338e-15	7.83731e-15
80055	-10.8036	1.31249e-15	7.9896e-15
2530	10.8006	1.32692e-15	8.06478e-15
55240	10.7997	1.33143e-15	8.08818e-15
51348	-10.7973	1.34283e-15	8.14732e-15
10174	-10.7966	1.34635e-15	8.16557e-15
27253	-10.7854	1.40257e-15	8.4549e-15
7264	10.7835	1.41241e-15	8.50517e-15
22854	-10.7823	1.41891e-15	8.53833e-15
654483	10.7788	1.43691e-15	8.62987e-15
4881	-10.7723	1.47162e-15	8.80543e-15
9444	-10.7679	1.49546e-15	8.92526e-15
30001	10.7668	1.50145e-15	8.95526e-15
10972	10.7609	1.53429e-15	9.11916e-15
64399	-10.7548	1.5688e-15	9.29012e-15
56649	10.7533	1.57759e-15	9.33345e-15
2264	-10.7523	1.58356e-15	9.36287e-15
64174	-10.7514	1.58846e-15	9.38698e-15
1719	10.7507	1.59245e-15	9.40656e-15
123041	-10.7416	1.64659e-15	9.67453e-15
150223	10.7409	1.65124e-15	9.69739e-15
196527	-10.7238	1.75774e-15	1.02158e-14
84309	10.7224	1.76705e-15	1.02606e-14
7102	-10.719	1.78926e-15	1.03672e-14
84969	-10.7146	1.81791e-15	1.0504e-14
5754	10.7131	1.8283e-15	1.05533e-14
27237	10.7107	1.84437e-15	1.06296e-14
201266	10.7102	1.84734e-15	1.06437e-14
54511	-10.71	1.84881e-15	1.06506e-14
1052	-10.7048	1.88486e-15	1.08206e-14
6697	10.7019	1.90461e-15	1.09133e-14
6909	-10.6991	1.92472e-15	1.10073e-14
26003	10.6988	1.92658e-15	1.10159e-14
81553	-10.698	1.93205e-15	1.10414e-14
3977	-10.697	1.93938e-15	1.10755e-14
25927	-10.6871	2.01102e-15	1.14064e-14
5199	-10.6864	2.01615e-15	1.143e-14
51692	10.6861	2.01853e-15	1.14409e-14
7498	10.6842	2.03292e-15	1.15067e-14
8809	-10.6831	2.04074e-15	1.15424e-14
79644	10.6807	2.05918e-15	1.16264e-14
84417	-10.6802	2.06282e-15	1.1643e-14
2690	-10.6771	2.08616e-15	1.17519e-14
27074	-10.6661	2.17188e-15	1.2153e-14
388795	-10.665	2.18126e-15	1.21965e-14
51804	10.6638	2.19058e-15	1.22398e-14
731424	-10.6603	2.21934e-15	1.23727e-14
761	-10.6596	2.22441e-15	1.23961e-14
644242	-10.6585	2.23359e-15	1.24384e-14
83849	-10.6542	2.26902e-15	1.26041e-14
8554	-10.652	2.2876e-15	1.26907e-14
3373	-10.6319	2.46318e-15	1.3531e-14
6935	-10.6309	2.4719e-15	1.35723e-14
65993	10.6303	2.47786e-15	1.36005e-14
140597	-10.6296	2.48391e-15	1.36292e-14
493861	-10.6283	2.49647e-15	1.36885e-14
94274	-10.6237	2.53873e-15	1.38875e-14
1776	-10.6178	2.59393e-15	1.41462e-14
191	10.613	2.64013e-15	1.43614e-14
2878	-10.613	2.64051e-15	1.43631e-14
79974	-10.6051	2.71888e-15	1.47257e-14
3133	-10.6026	2.74304e-15	1.48369e-14
9749	-10.6021	2.74812e-15	1.48602e-14
57406	-10.5973	2.7979e-15	1.50882e-14
117157	-10.5909	2.8644e-15	1.53908e-14
6274	-10.5858	2.91836e-15	1.56347e-14
56061	10.5832	2.94704e-15	1.57638e-14
9837	10.5797	2.98531e-15	1.59354e-14
51232	-10.5788	2.99475e-15	1.59776e-14
57658	-10.574	3.04825e-15	1.62161e-14
10810	-10.5576	3.23847e-15	1.70528e-14
80775	10.556	3.25703e-15	1.71336e-14
79927	-10.5555	3.26379e-15	1.71629e-14
4818	-10.5545	3.27558e-15	1.72141e-14
1798	10.5541	3.28044e-15	1.72352e-14
9353	-10.5533	3.28999e-15	1.72766e-14
471	10.5505	3.32341e-15	1.74211e-14
91319	10.548	3.35514e-15	1.75577e-14
642946	10.5478	3.35701e-15	1.75658e-14
79762	-10.5468	3.37007e-15	1.76219e-14
202915	10.5443	3.40082e-15	1.77537e-14
91694	-10.542	3.42976e-15	1.78774e-14
9510	-10.5412	3.43932e-15	1.79182e-14
152137	-10.541	3.44185e-15	1.7929e-14
122953	-10.5403	3.45165e-15	1.79707e-14
29960	10.5363	3.5029e-15	1.81882e-14
90865	-10.5331	3.54388e-15	1.83614e-14
56924	10.5313	3.56838e-15	1.84645e-14
2949	-10.5311	3.57077e-15	1.84746e-14
23492	-10.5198	3.72259e-15	1.91456e-14
54933	10.5097	3.86349e-15	1.97613e-14
166336	-10.5093	3.87e-15	1.97896e-14
116238	10.5078	3.89055e-15	1.98788e-14
11222	10.506	3.91747e-15	1.99955e-14
9934	-10.5042	3.94294e-15	2.01055e-14
51629	10.4993	4.01515e-15	2.04165e-14
84447	10.4991	4.01763e-15	2.04272e-14
9124	-10.4979	4.03503e-15	2.05019e-14
8914	10.497	4.04854e-15	2.05598e-14
8843	-10.4959	4.06619e-15	2.06353e-14
316	-10.4923	4.12079e-15	2.08761e-14
83888	-10.4764	4.36918e-15	2.19631e-14
2012	-10.475	4.39205e-15	2.20623e-14
51303	10.4707	4.46196e-15	2.23648e-14
65005	10.4692	4.4864e-15	2.24702e-14
58986	10.4691	4.48819e-15	2.24779e-14
118932	10.469	4.4906e-15	2.24883e-14
26051	-10.4676	4.51319e-15	2.25856e-14
8639	-10.4595	4.65049e-15	2.31739e-14
200504	-10.4581	4.67449e-15	2.32763e-14
22889	10.4561	4.70906e-15	2.34234e-14
5002	10.4533	4.75884e-15	2.36347e-14
26086	-10.4519	4.78386e-15	2.37407e-14
9535	-10.4387	5.02326e-15	2.47601e-14
89944	10.4361	5.07187e-15	2.49654e-14
4628	-10.4359	5.07543e-15	2.49804e-14
6732	10.4334	5.12214e-15	2.51771e-14
154467	10.4299	5.18875e-15	2.54568e-14
58484	-10.4294	5.19808e-15	2.54958e-14
9728	-10.4225	5.33346e-15	2.60606e-14
2719	-10.4181	5.41945e-15	2.64172e-14
84908	10.4175	5.43263e-15	2.64717e-14
100133944	10.4173	5.43737e-15	2.64913e-14
11285	10.411	5.56517e-15	2.70175e-14
201254	10.4097	5.59141e-15	2.7125e-14
7105	10.4038	5.71604e-15	2.76339e-14
8425	-10.3986	5.82544e-15	2.80776e-14
11067	-10.3952	5.89929e-15	2.83757e-14
2828	-10.3905	6.00311e-15	2.87926e-14
79697	10.3894	6.02804e-15	2.88924e-14
51393	-10.3876	6.0684e-15	2.90536e-14
9844	-10.3861	6.10122e-15	2.91844e-14
9022	-10.3855	6.11639e-15	2.92448e-14
51421	-10.381	6.2189e-15	2.96517e-14
64118	10.3809	6.22023e-15	2.96569e-14
5603	10.3797	6.24827e-15	2.97678e-14
10945	10.3786	6.27335e-15	2.98668e-14
7153	10.377	6.31193e-15	3.00189e-14
79581	10.3759	6.33802e-15	3.01215e-14
51128	10.3653	6.59026e-15	3.11775e-14
5551	-10.3646	6.60727e-15	3.12483e-14
32	-10.3594	6.73621e-15	3.1784e-14
1326	-10.3568	6.80208e-15	3.20567e-14
113878	10.3542	6.86917e-15	3.23338e-14
8777	-10.3522	6.91932e-15	3.25406e-14
4118	-10.3455	7.09366e-15	3.32562e-14
348094	-10.3399	7.24269e-15	3.38644e-14
79184	10.3389	7.26957e-15	3.39738e-14
55086	-10.3381	7.29123e-15	3.40619e-14
4215	-10.3327	7.43887e-15	3.46602e-14
10765	10.3323	7.45017e-15	3.47058e-14
57458	-10.3261	7.62175e-15	3.5397e-14
23213	10.3225	7.72552e-15	3.58129e-14
1470	10.3223	7.73059e-15	3.58332e-14
6586	-10.3138	7.97997e-15	3.68264e-14
9547	10.3118	8.03696e-15	3.70522e-14
345557	-10.3113	8.05218e-15	3.71124e-14
29100	10.3111	8.05898e-15	3.71393e-14
1728	10.3051	8.24115e-15	3.78573e-14
221749	-10.2942	8.58164e-15	3.91871e-14
84791	10.2889	8.75217e-15	3.98472e-14
23764	-10.2887	8.75905e-15	3.98738e-14
5137	-10.2878	8.78871e-15	3.99882e-14
3995	-10.2824	8.96526e-15	4.06666e-14
81575	-10.2806	9.0274e-15	4.09044e-14
23321	10.278	9.11254e-15	4.12294e-14
57549	10.2767	9.15732e-15	4.13999e-14
84978	10.2712	9.34754e-15	4.21214e-14
3026	10.2699	9.39283e-15	4.22925e-14
26577	-10.2697	9.39999e-15	4.23195e-14
387763	-10.269	9.42527e-15	4.24149e-14
57716	-10.2678	9.46576e-15	4.25675e-14
1468	10.2668	9.50183e-15	4.27032e-14
10331	10.2662	9.52338e-15	4.27842e-14
51162	-10.2626	9.65119e-15	4.32634e-14
23499	-10.2625	9.65513e-15	4.32782e-14
11065	10.2552	9.91831e-15	4.4307e-14
4023	-10.247	1.02275e-14	4.55068e-14
9913	-10.2406	1.04719e-14	4.64483e-14
3842	10.2399	1.05001e-14	4.6557e-14
9638	-10.2385	1.05542e-14	4.67642e-14
317649	-10.2373	1.06035e-14	4.69532e-14
646808	10.236	1.06538e-14	4.71455e-14
54532	-10.2339	1.07396e-14	4.74732e-14
4321	10.2312	1.08455e-14	4.78766e-14
100129069	-10.2296	1.09102e-14	4.81227e-14
26153	-10.2282	1.09692e-14	4.83467e-14
10578	-10.2255	1.10801e-14	4.87666e-14
991	10.2214	1.12474e-14	4.94084e-14
6247	-10.2179	1.13982e-14	4.99848e-14
8799	10.2028	1.2055e-14	5.24724e-14
375346	-10.2022	1.20846e-14	5.25837e-14
51285	-10.2013	1.21252e-14	5.27361e-14
2	-10.1986	1.22455e-14	5.31871e-14
388228	10.1961	1.23618e-14	5.36221e-14
22915	-10.1928	1.25125e-14	5.41836e-14
4653	-10.1863	1.28183e-14	5.53177e-14
23766	-10.1823	1.30141e-14	5.60394e-14
441194	10.1812	1.30637e-14	5.6222e-14
4739	-10.1772	1.32646e-14	5.69586e-14
51299	-10.1763	1.33069e-14	5.71132e-14
100287525	10.1757	1.33352e-14	5.72167e-14
54499	10.1755	1.3346e-14	5.72562e-14
8363	10.17	1.36225e-14	5.82629e-14
56155	-10.1688	1.36838e-14	5.84854e-14
701	10.1659	1.38306e-14	5.90167e-14
64223	10.1647	1.38963e-14	5.92539e-14
3898	10.1598	1.41539e-14	6.01803e-14
6676	10.1535	1.44897e-14	6.13806e-14
200894	-10.1523	1.45526e-14	6.16045e-14
55760	10.1511	1.46193e-14	6.18414e-14
10609	10.1504	1.46565e-14	6.19736e-14
10195	10.1503	1.46635e-14	6.19981e-14
2113	-10.1473	1.4827e-14	6.25772e-14
266812	-10.147	1.48432e-14	6.26344e-14
599	-10.145	1.4953e-14	6.30218e-14
10763	-10.1421	1.51145e-14	6.35903e-14
149420	10.1376	1.53739e-14	6.44988e-14
55695	10.1367	1.54243e-14	6.46748e-14
81617	-10.1367	1.54273e-14	6.46849e-14
23237	-10.1294	1.58508e-14	6.61558e-14
6185	10.1262	1.60435e-14	6.68204e-14
474384	10.126	1.60554e-14	6.68612e-14
84100	-10.1254	1.60881e-14	6.69737e-14
10360	10.1236	1.61999e-14	6.73576e-14
4783	-10.1213	1.63392e-14	6.78349e-14
138151	-10.1207	1.63718e-14	6.79462e-14
120329	-10.1188	1.64902e-14	6.83503e-14
5937	-10.1178	1.65531e-14	6.85648e-14
80021	10.1167	1.66213e-14	6.87969e-14
222166	-10.1144	1.67661e-14	6.92977e-14
142	10.1103	1.70199e-14	7.01734e-14
6281	-10.1079	1.71786e-14	7.07187e-14
5745	-10.1019	1.75649e-14	7.20394e-14
81932	10.1011	1.76194e-14	7.2225e-14
445329	-10.0984	1.7795e-14	7.28214e-14
100132910	10.097	1.78924e-14	7.31513e-14
50650	-10.0933	1.81371e-14	7.39774e-14
58477	10.0928	1.81691e-14	7.40851e-14
114898	-10.0911	1.82852e-14	7.44756e-14
11197	-10.0902	1.83498e-14	7.46925e-14
57520	-10.0897	1.83838e-14	7.48064e-14
57572	-10.0862	1.86278e-14	7.56226e-14
8685	-10.0857	1.86583e-14	7.57242e-14
100128731	10.0816	1.89522e-14	7.67219e-14
388650	10.0812	1.89798e-14	7.68153e-14
10272	-10.0697	1.98072e-14	7.98203e-14
10326	-10.0687	1.9884e-14	8.00981e-14
4905	10.0684	1.99089e-14	8.0188e-14
4580	10.064	2.02391e-14	8.13788e-14
2358	-10.06	2.05419e-14	8.24673e-14
2706	10.0595	2.0579e-14	8.26002e-14
420	-10.0543	2.09871e-14	8.40739e-14
5997	-10.052	2.11694e-14	8.47302e-14
4616	-10.0462	2.16287e-14	8.63787e-14
100144603	10.0445	2.17701e-14	8.68851e-14
405754	-10.0384	2.22744e-14	8.86843e-14
3202	-10.0314	2.28661e-14	9.07847e-14
2202	-10.027	2.32439e-14	9.21198e-14
401115	10.024	2.35042e-14	9.30367e-14
219995	-10.0208	2.37894e-14	9.40388e-14
7760	10.0181	2.40337e-14	9.4895e-14
84259	-10.0159	2.42318e-14	9.55878e-14
122961	10.0155	2.42603e-14	9.56875e-14
200185	10.0095	2.48204e-14	9.7639e-14
5091	10.0091	2.48546e-14	9.77578e-14
64116	-10.0082	2.49336e-14	9.80321e-14
54539	10.0037	2.53637e-14	9.95222e-14
147968	10.0027	2.54562e-14	9.98419e-14
22796	9.99609	2.60941e-14	1.02059e-13
23600	9.99197	2.65001e-14	1.03464e-13
9721	-9.99123	2.65737e-14	1.03718e-13
5471	9.9901	2.66865e-14	1.04107e-13
100288730	-9.98525	2.7176e-14	1.05813e-13
55808	9.98231	2.74769e-14	1.06858e-13
57153	-9.97711	2.80176e-14	1.08729e-13
8645	9.97581	2.81546e-14	1.09202e-13
6283	-9.96695	2.91056e-14	1.12471e-13
55765	9.96348	2.94868e-14	1.13775e-13
55075	-9.95518	3.04191e-14	1.16947e-13
7818	9.95143	3.08497e-14	1.18404e-13
121053	9.95087	3.09148e-14	1.18624e-13
2009	-9.94886	3.11493e-14	1.19415e-13
51400	9.94746	3.13129e-14	1.19967e-13
10007	9.94611	3.14717e-14	1.20501e-13
4931	9.94465	3.16441e-14	1.2108e-13
23111	-9.93728	3.2532e-14	1.24051e-13
30815	-9.93187	3.31996e-14	1.26272e-13
55920	9.9305	3.33703e-14	1.26838e-13
26575	9.92547	3.40063e-14	1.2894e-13
10112	9.92248	3.43904e-14	1.30205e-13
80308	9.92124	3.45501e-14	1.3073e-13
64175	9.91904	3.48376e-14	1.31672e-13
55204	9.91892	3.48531e-14	1.31723e-13
2017	9.91322	3.56064e-14	1.34184e-13
2869	-9.91276	3.56681e-14	1.34385e-13
171024	-9.91117	3.58817e-14	1.3508e-13
3563	-9.90959	3.60958e-14	1.35775e-13
29950	-9.90657	3.65063e-14	1.37105e-13
8648	-9.90623	3.6553e-14	1.37256e-13
619423	-9.90056	3.73404e-14	1.39795e-13
27286	9.89876	3.75937e-14	1.40609e-13
2219	-9.89783	3.77252e-14	1.4103e-13
79901	-9.89526	3.80912e-14	1.42202e-13
3569	-9.88985	3.88733e-14	1.44694e-13
27301	9.88783	3.9169e-14	1.45633e-13
9093	9.88486	3.96098e-14	1.47028e-13
2525	9.88381	3.97659e-14	1.47521e-13
7538	-9.88263	3.99426e-14	1.48079e-13
650	-9.88132	4.01397e-14	1.487e-13
256691	-9.87908	4.04795e-14	1.49768e-13
84081	-9.87797	4.06488e-14	1.50299e-13
2268	-9.87748	4.07224e-14	1.5053e-13
55313	-9.87668	4.0845e-14	1.50914e-13
23090	-9.87182	4.15989e-14	1.53268e-13
115361	-9.87156	4.16398e-14	1.53395e-13
2286	9.8681	4.21852e-14	1.55089e-13
283508	-9.86654	4.24334e-14	1.55858e-13
361	-9.86561	4.25816e-14	1.56316e-13
1290	9.86439	4.27765e-14	1.56918e-13
53838	9.86328	4.29557e-14	1.5747e-13
2590	9.848	4.54961e-14	1.65724e-13
947	-9.84482	4.60439e-14	1.6749e-13
55620	9.84172	4.65834e-14	1.69224e-13
10203	-9.83981	4.69207e-14	1.70306e-13
23438	9.83737	4.73536e-14	1.71692e-13
8704	9.83713	4.73956e-14	1.71827e-13
29094	-9.83296	4.81444e-14	1.74217e-13
2802	9.8294	4.87939e-14	1.76282e-13
3161	9.82504	4.96009e-14	1.7884e-13
55303	-9.82235	5.01057e-14	1.80435e-13
226	9.81897	5.07488e-14	1.8246e-13
85028	9.81847	5.08431e-14	1.82757e-13
51428	9.81777	5.0978e-14	1.83181e-13
3005	9.81769	5.09931e-14	1.83228e-13
9770	-9.81567	5.13833e-14	1.84453e-13
55040	9.80842	5.28048e-14	1.88894e-13
8668	9.80688	5.31106e-14	1.89845e-13
10237	9.80606	5.32754e-14	1.90357e-13
1741	9.80525	5.34387e-14	1.90864e-13
79739	-9.80221	5.40546e-14	1.92773e-13
26470	9.80145	5.42085e-14	1.93249e-13
389125	-9.79847	5.48198e-14	1.95136e-13
6491	9.79427	5.56944e-14	1.97827e-13
55422	-9.79228	5.6113e-14	1.9911e-13
10330	9.79023	5.6549e-14	2.00444e-13
408	-9.78744	5.71469e-14	2.02269e-13
114905	-9.7871	5.72201e-14	2.02492e-13
10076	9.78337	5.80294e-14	2.04953e-13
9780	-9.78332	5.80403e-14	2.04986e-13
66036	-9.7799	5.87935e-14	2.07268e-13
84334	9.77935	5.89149e-14	2.07635e-13
64123	-9.77929	5.89281e-14	2.07675e-13
83857	-9.77384	6.01517e-14	2.11423e-13
11027	-9.77277	6.03953e-14	2.12166e-13
10322	9.77154	6.06753e-14	2.1302e-13
10529	-9.7695	6.11421e-14	2.14441e-13
8345	9.76551	6.20704e-14	2.17288e-13
79703	9.76339	6.25679e-14	2.18809e-13
91461	-9.75802	6.38479e-14	2.22709e-13
6103	-9.7535	6.49449e-14	2.26035e-13
25878	9.75256	6.51766e-14	2.26736e-13
2357	-9.75182	6.53586e-14	2.27286e-13
114769	-9.74604	6.67967e-14	2.31617e-13
255743	-9.74463	6.71549e-14	2.32691e-13
6515	-9.74417	6.72697e-14	2.33036e-13
687	-9.74341	6.74648e-14	2.3362e-13
139231	9.74071	6.81532e-14	2.35679e-13
26499	9.73733	6.90285e-14	2.38288e-13
2597	9.73507	6.96195e-14	2.40045e-13
728	-9.73495	6.96519e-14	2.40142e-13
11149	-9.73011	7.09346e-14	2.4394e-13
79977	9.72966	7.10559e-14	2.44298e-13
91862	9.72907	7.12132e-14	2.44762e-13
7126	-9.7268	7.18262e-14	2.46579e-13
389136	-9.72117	7.33697e-14	2.51245e-13
5101	-9.72082	7.34671e-14	2.51539e-13
55568	9.71632	7.47247e-14	2.55322e-13
6397	-9.71429	7.52981e-14	2.57042e-13
10749	-9.71266	7.57626e-14	2.58432e-13
54443	9.70803	7.71003e-14	2.62426e-13
84706	9.70639	7.75788e-14	2.63851e-13
11024	-9.70634	7.75941e-14	2.63896e-13
26151	9.6979	8.01046e-14	2.71441e-13
670	9.69681	8.04354e-14	2.7243e-13
5437	9.68962	8.26497e-14	2.79033e-13
9618	9.68795	8.31742e-14	2.8059e-13
1277	9.68292	8.47697e-14	2.85314e-13
283208	9.68271	8.48364e-14	2.85511e-13
255480	-9.67787	8.6403e-14	2.90127e-13
11313	9.67717	8.66316e-14	2.90799e-13
152007	-9.67543	8.72025e-14	2.92475e-13
55144	9.67437	8.75523e-14	2.93501e-13
54873	-9.67434	8.75604e-14	2.93524e-13
283298	-9.67391	8.77048e-14	2.93948e-13
285203	-9.67307	8.79815e-14	2.94757e-13
155400	9.66893	8.93684e-14	2.98823e-13
80222	9.66633	9.0253e-14	3.01408e-13
3791	-9.66221	9.16672e-14	3.05526e-13
808	-9.65923	9.27075e-14	3.08546e-13
51236	9.65869	9.28975e-14	3.09096e-13
53918	-9.65651	9.36656e-14	3.11319e-13
57091	-9.65435	9.44351e-14	3.13541e-13
27095	9.6525	9.50975e-14	3.1545e-13
286133	-9.65061	9.57776e-14	3.17406e-13
57605	-9.64699	9.70996e-14	3.21198e-13
8406	-9.64217	9.88848e-14	3.26297e-13
65990	9.64199	9.89528e-14	3.2649e-13
7051	-9.64009	9.96635e-14	3.28513e-13
10970	9.63866	1.00207e-13	3.30055e-13
6241	9.63851	1.00261e-13	3.3021e-13
1879	-9.63051	1.03343e-13	3.39357e-13
83604	-9.62137	1.06978e-13	3.50079e-13
50512	9.61888	1.07992e-13	3.53055e-13
8622	-9.61861	1.08103e-13	3.53382e-13
65009	-9.61195	1.10861e-13	3.61448e-13
374500	-9.60987	1.11738e-13	3.64005e-13
3727	-9.60662	1.13121e-13	3.68027e-13
2921	-9.60635	1.13236e-13	3.6836e-13
9232	9.60304	1.14664e-13	3.72504e-13
891	9.60039	1.15819e-13	3.75846e-13
90139	-9.59472	1.18331e-13	3.83089e-13
116228	9.59389	1.18704e-13	3.84159e-13
2542	9.59134	1.19856e-13	3.87469e-13
89846	-9.59068	1.20157e-13	3.88332e-13
5692	9.58976	1.20575e-13	3.8953e-13
342527	-9.58908	1.20886e-13	3.90419e-13
51657	9.58838	1.21206e-13	3.91336e-13
10874	9.58704	1.21821e-13	3.93095e-13
27143	-9.58469	1.22912e-13	3.96208e-13
26353	-9.58001	1.25112e-13	4.02468e-13
84518	9.57587	1.27086e-13	4.08065e-13
55163	9.57538	1.27322e-13	4.08732e-13
10516	-9.57148	1.29217e-13	4.14082e-13
9922	-9.57096	1.29473e-13	4.14805e-13
1521	-9.5705	1.29697e-13	4.15436e-13
339229	9.56567	1.32094e-13	4.2222e-13
607	9.56126	1.34322e-13	4.28497e-13
3824	-9.554	1.38065e-13	4.3899e-13
7082	-9.55312	1.38528e-13	4.40284e-13
284	-9.55224	1.38993e-13	4.41583e-13
839	9.54958	1.40397e-13	4.45495e-13
8404	-9.54918	1.40612e-13	4.46091e-13
9276	9.54631	1.4215e-13	4.50363e-13
144195	-9.54627	1.42174e-13	4.50432e-13
81889	9.54195	1.44517e-13	4.56918e-13
5016	9.5405	1.45314e-13	4.59118e-13
2523	-9.53786	1.46778e-13	4.63153e-13
344595	-9.53644	1.47571e-13	4.65333e-13
169611	-9.53563	1.48023e-13	4.66575e-13
23594	9.53414	1.48861e-13	4.68873e-13
10327	9.53233	1.49889e-13	4.71692e-13
3142	-9.53073	1.508e-13	4.74181e-13
83892	-9.52646	1.5326e-13	4.81146e-13
1808	-9.5204	1.56827e-13	4.91207e-13
871	9.5139	1.60741e-13	5.0219e-13
168537	-9.51246	1.6162e-13	5.0465e-13
9401	9.5109	1.62579e-13	5.07329e-13
83695	9.503	1.67524e-13	5.21095e-13
10525	9.50236	1.67937e-13	5.2224e-13
57683	-9.49802	1.70723e-13	5.29953e-13
55856	9.49619	1.71913e-13	5.33238e-13
55656	9.49478	1.72835e-13	5.3578e-13
27303	-9.4936	1.73612e-13	5.3792e-13
22801	9.49343	1.73725e-13	5.38232e-13
126789	9.49087	1.75417e-13	5.42886e-13
2767	-9.48919	1.76541e-13	5.45971e-13
7083	9.48797	1.77358e-13	5.4821e-13
3421	9.48456	1.79673e-13	5.54544e-13
27123	-9.4837	1.80256e-13	5.56137e-13
79728	9.47595	1.8564e-13	5.70784e-13
7407	9.47481	1.86449e-13	5.72975e-13
221908	9.47298	1.87747e-13	5.76487e-13
9833	9.47275	1.8791e-13	5.76929e-13
11080	-9.46967	1.90124e-13	5.82904e-13
6275	-9.4681	1.91261e-13	5.85967e-13
11230	9.46764	1.91591e-13	5.86856e-13
360023	9.46576	1.92969e-13	5.90562e-13
8086	9.46386	1.94365e-13	5.94308e-13
2762	9.46207	1.9569e-13	5.97858e-13
51659	9.45859	1.98294e-13	6.04816e-13
2617	9.45794	1.98782e-13	6.06117e-13
26524	-9.45504	2.00985e-13	6.12051e-13
84106	-9.44768	2.06687e-13	6.27335e-13
6578	-9.44463	2.09094e-13	6.33757e-13
84886	-9.44407	2.09542e-13	6.3495e-13
147184	9.44395	2.09638e-13	6.35206e-13
3939	9.44134	2.1173e-13	6.40768e-13
283481	-9.43844	2.14074e-13	6.46986e-13
1958	-9.43739	2.14929e-13	6.4925e-13
23607	9.43459	2.1723e-13	6.55331e-13
5010	-9.42977	2.21245e-13	6.65905e-13
84734	-9.42806	2.22689e-13	6.69696e-13
3201	-9.4272	2.23418e-13	6.71607e-13
56052	9.42166	2.28174e-13	6.84037e-13
6751	-9.42127	2.2851e-13	6.84911e-13
5739	-9.41963	2.29937e-13	6.88628e-13
113000	9.41818	2.31209e-13	6.91933e-13
161753	-9.41744	2.31866e-13	6.9364e-13
11079	9.41572	2.3338e-13	6.97566e-13
29767	-9.41187	2.36831e-13	7.06489e-13
79590	9.41119	2.37438e-13	7.08054e-13
80347	9.41043	2.3813e-13	7.0984e-13
1356	9.41026	2.38279e-13	7.10223e-13
10113	9.40746	2.40835e-13	7.16869e-13
7283	9.39996	2.47799e-13	7.34885e-13
22820	9.39919	2.48529e-13	7.36764e-13
6790	9.39907	2.48637e-13	7.37043e-13
130271	-9.39605	2.51517e-13	7.44449e-13
81565	-9.39596	2.516e-13	7.4466e-13
124583	9.39055	2.5683e-13	7.58049e-13
25791	9.38859	2.58756e-13	7.62962e-13
64374	9.3861	2.61218e-13	7.69227e-13
55222	9.3823	2.65022e-13	7.78874e-13
86	9.38058	2.66768e-13	7.8329e-13
84985	9.38033	2.67017e-13	7.83918e-13
2648	9.37922	2.68149e-13	7.86777e-13
7078	-9.37833	2.69062e-13	7.89078e-13
91057	9.37531	2.72171e-13	7.96903e-13
23139	9.37321	2.74351e-13	8.02373e-13
51099	-9.37318	2.74389e-13	8.02467e-13
140707	9.37308	2.74488e-13	8.02715e-13
10130	9.37275	2.7483e-13	8.03573e-13
23209	-9.36955	2.78202e-13	8.12286e-13
79782	9.36574	2.82268e-13	8.22759e-13
203228	-9.36453	2.83568e-13	8.26099e-13
1051	-9.36376	2.84399e-13	8.28231e-13
11097	9.36107	2.87324e-13	8.35916e-13
4171	9.35575	2.93206e-13	8.51457e-13
55924	-9.35332	2.95938e-13	8.58657e-13
2999	-9.35131	2.98212e-13	8.64637e-13
6817	-9.34567	3.04687e-13	8.81627e-13
7133	-9.34491	3.05569e-13	8.83935e-13
10606	9.34357	3.0713e-13	8.88018e-13
10591	9.33284	3.19943e-13	9.21382e-13
729680	-9.33279	3.20007e-13	9.21548e-13
3422	-9.32824	3.25595e-13	9.36016e-13
442075	9.32446	3.30324e-13	9.48221e-13
2150	9.32101	3.34695e-13	9.59468e-13
84617	-9.32094	3.34783e-13	9.59695e-13
26585	9.31881	3.37513e-13	9.66704e-13
10228	9.31253	3.45695e-13	9.87643e-13
780	9.31218	3.46156e-13	9.88817e-13
89853	-9.30839	3.5119e-13	1.00165e-12
9787	9.30614	3.54216e-13	1.00933e-12
114822	9.30598	3.54424e-13	1.00986e-12
578	9.30305	3.58405e-13	1.01996e-12
79174	9.30257	3.59073e-13	1.02165e-12
59338	-9.30198	3.59879e-13	1.02369e-12
10398	-9.29683	3.67018e-13	1.04171e-12
710	-9.293	3.72414e-13	1.05529e-12
51204	9.28979	3.76995e-13	1.06677e-12
56114	-9.2884	3.78995e-13	1.07178e-12
4242	-9.28793	3.79689e-13	1.07351e-12
1020	9.28756	3.80216e-13	1.07483e-12
79077	9.28602	3.82463e-13	1.08044e-12
651746	-9.28544	3.83302e-13	1.08254e-12
51744	-9.28145	3.89185e-13	1.09719e-12
26284	9.27952	3.92052e-13	1.1043e-12
9277	9.27911	3.92678e-13	1.10586e-12
2237	9.27708	3.95727e-13	1.11341e-12
51512	9.27373	4.00814e-13	1.12599e-12
2354	-9.27371	4.00853e-13	1.12608e-12
3832	9.26893	4.0823e-13	1.14425e-12
6622	-9.26778	4.10021e-13	1.14865e-12
9759	-9.26681	4.11543e-13	1.15238e-12
2444	9.26669	4.11727e-13	1.15283e-12
64786	-9.26186	4.19382e-13	1.17156e-12
2188	9.26055	4.21493e-13	1.1767e-12
3628	-9.25955	4.23103e-13	1.18063e-12
9429	-9.25904	4.23918e-13	1.18261e-12
79000	9.24368	4.49515e-13	1.24676e-12
10551	9.2425	4.5154e-13	1.2518e-12
663	-9.24136	4.53524e-13	1.25674e-12
79852	9.24036	4.5526e-13	1.26106e-12
79035	9.23892	4.57754e-13	1.26725e-12
51537	9.23729	4.60616e-13	1.27435e-12
286097	-9.23696	4.61208e-13	1.27582e-12
1950	9.23685	4.61391e-13	1.27627e-12
590	-9.23087	4.72051e-13	1.30263e-12
57864	-9.22602	4.80877e-13	1.32436e-12
91683	9.22498	4.82781e-13	1.32903e-12
7048	-9.21359	5.04263e-13	1.38151e-12
113130	9.21268	5.06012e-13	1.38576e-12
11015	9.21252	5.0633e-13	1.38653e-12
5877	9.212	5.07332e-13	1.38896e-12
157310	-9.21099	5.09295e-13	1.39373e-12
84792	9.20787	5.15402e-13	1.40852e-12
6799	-9.20735	5.1643e-13	1.41101e-12
51203	9.20634	5.18421e-13	1.41582e-12
91851	-9.20551	5.20069e-13	1.4198e-12
10891	-9.20437	5.22334e-13	1.42526e-12
29970	-9.20037	5.30374e-13	1.44462e-12
51361	9.19902	5.33118e-13	1.45121e-12
4734	-9.19888	5.33417e-13	1.45193e-12
6442	-9.19744	5.36353e-13	1.45897e-12
57669	-9.1972	5.36844e-13	1.46014e-12
4221	9.19525	5.40856e-13	1.46975e-12
4163	-9.19488	5.41624e-13	1.47158e-12
57584	-9.19068	5.50394e-13	1.49291e-12
26253	-9.1887	5.5456e-13	1.50302e-12
2157	-9.18549	5.61423e-13	1.51964e-12
147920	9.18343	5.6585e-13	1.53033e-12
128240	9.18227	5.68371e-13	1.53641e-12
260294	9.18051	5.72197e-13	1.54563e-12
219738	9.17689	5.80183e-13	1.56483e-12
9477	9.17593	5.82313e-13	1.56994e-12
3810	-9.17315	5.88541e-13	1.58487e-12
128239	9.17075	5.9397e-13	1.59785e-12
152330	-9.16999	5.95692e-13	1.60196e-12
4205	-9.16689	6.02792e-13	1.61888e-12
6652	9.16591	6.05045e-13	1.62424e-12
5351	9.16044	6.17852e-13	1.65572e-12
2281	-9.15651	6.27205e-13	1.67865e-12
2048	9.1531	6.35426e-13	1.69875e-12
83707	9.15081	6.41029e-13	1.71243e-12
124222	9.141	6.65551e-13	1.77203e-12
3823	-9.13977	6.68678e-13	1.77961e-12
23075	-9.1344	6.82558e-13	1.81314e-12
30846	-9.1295	6.95471e-13	1.84423e-12
81563	-9.12945	6.95602e-13	1.84454e-12
9459	-9.12875	6.97476e-13	1.84904e-12
9761	9.1269	7.02434e-13	1.86094e-12
64344	-9.12629	7.04072e-13	1.86487e-12
8013	-9.12445	7.09043e-13	1.87678e-12
10791	-9.12353	7.1156e-13	1.88281e-12
55154	9.12046	7.19961e-13	1.90289e-12
27295	-9.11913	7.23629e-13	1.91164e-12
123016	9.11645	7.31112e-13	1.92947e-12
29760	9.11574	7.33092e-13	1.93418e-12
80010	9.11372	7.3878e-13	1.9477e-12
9021	-9.11018	7.4887e-13	1.97164e-12
54894	9.10969	7.50272e-13	1.97496e-12
219844	9.10862	7.5334e-13	1.98222e-12
285147	-9.10561	7.62074e-13	2.0029e-12
55009	9.09889	7.81937e-13	2.04976e-12
8772	9.09626	7.89874e-13	2.06842e-12
5723	9.09273	8.00616e-13	2.09361e-12
200634	9.09212	8.02482e-13	2.09798e-12
5734	-9.0868	8.18996e-13	2.13655e-12
83461	9.08557	8.22871e-13	2.14557e-12
10435	-9.08118	8.36832e-13	2.17802e-12
80227	9.08062	8.38638e-13	2.1822e-12
84300	9.07393	8.60394e-13	2.2325e-12
28511	9.07179	8.6749e-13	2.24885e-12
9950	9.06944	8.75328e-13	2.26687e-12
388753	9.06885	8.77302e-13	2.2714e-12
51449	-9.06858	8.78221e-13	2.27351e-12
7841	9.06823	8.79386e-13	2.27618e-12
622	9.0678	8.80831e-13	2.2795e-12
10260	-9.06476	8.9116e-13	2.30315e-12
81619	-9.06448	8.92118e-13	2.30535e-12
57147	9.06228	8.99669e-13	2.32259e-12
146439	9.0609	9.04447e-13	2.33349e-12
3608	9.05926	9.10148e-13	2.34648e-12
2621	-9.0579	9.149e-13	2.35729e-12
6573	-9.05525	9.2423e-13	2.37847e-12
26229	9.05477	9.25949e-13	2.38237e-12
7791	-9.05296	9.32381e-13	2.39694e-12
8443	9.05169	9.36949e-13	2.40727e-12
28232	-9.04431	9.63845e-13	2.46786e-12
65124	-9.04382	9.6563e-13	2.47187e-12
124454	9.04379	9.65741e-13	2.47211e-12
256714	9.0424	9.709e-13	2.48368e-12
445347	-9.03999	9.79934e-13	2.5039e-12
2308	-9.03562	9.96485e-13	2.54083e-12
56913	9.03347	1.00473e-12	2.55916e-12
322	-9.03339	1.00505e-12	2.55987e-12
51058	9.03336	1.00518e-12	2.56016e-12
51557	9.02986	1.01876e-12	2.59027e-12
5003	9.02726	1.02895e-12	2.61282e-12
10535	9.02685	1.03055e-12	2.61634e-12
135932	-9.02643	1.03223e-12	2.62006e-12
5627	-9.02619	1.03319e-12	2.62217e-12
202658	9.02408	1.04155e-12	2.6406e-12
29984	9.02209	1.04957e-12	2.65822e-12
23258	-9.01775	1.06717e-12	2.6968e-12
358	-9.017	1.07022e-12	2.70347e-12
493856	9.01582	1.0751e-12	2.71411e-12
5315	9.01514	1.07791e-12	2.72025e-12
643790	9.01237	1.08942e-12	2.74532e-12
1289	9.01226	1.08988e-12	2.74632e-12
141	-9.01092	1.09551e-12	2.75855e-12
3726	-9.01068	1.09653e-12	2.76076e-12
112939	9.00658	1.11389e-12	2.79923e-12
29901	9.0052	1.1198e-12	2.81228e-12
4969	-9.00251	1.13141e-12	2.83789e-12
84295	9.00229	1.13237e-12	2.84e-12
1979	-9.00104	1.13784e-12	2.85204e-12
5255	8.99953	1.14443e-12	2.86652e-12
29915	-8.99617	1.15927e-12	2.89908e-12
22974	8.99298	1.17356e-12	2.93032e-12
572558	-8.99191	1.17838e-12	2.94083e-12
2034	-8.99031	1.18565e-12	2.95669e-12
6862	8.98979	1.18801e-12	2.96181e-12
909	8.9874	1.19895e-12	2.98561e-12
202243	8.9871	1.20037e-12	2.98869e-12
2673	8.98162	1.22585e-12	3.04486e-12
113451	8.97915	1.23755e-12	3.07057e-12
9737	-8.97629	1.25122e-12	3.10055e-12
55450	-8.97237	1.27018e-12	3.14197e-12
7267	8.97236	1.27022e-12	3.14207e-12
60675	-8.97213	1.27136e-12	3.14456e-12
4929	-8.9708	1.27786e-12	3.15873e-12
3703	8.96884	1.28751e-12	3.17973e-12
65244	8.96881	1.28768e-12	3.1801e-12
30009	-8.96801	1.29162e-12	3.18867e-12
51645	8.95897	1.33725e-12	3.29318e-12
124808	8.95826	1.34091e-12	3.30153e-12
3110	8.9534	1.36614e-12	3.35908e-12
348801	-8.94855	1.39187e-12	3.41759e-12
146956	8.94143	1.43044e-12	3.50502e-12
7965	8.94076	1.43413e-12	3.51336e-12
10979	-8.93803	1.44927e-12	3.54756e-12
54733	8.93402	1.47175e-12	3.59825e-12
3251	8.93347	1.47488e-12	3.60531e-12
64063	8.93009	1.49416e-12	3.64866e-12
6359	-8.92941	1.49804e-12	3.65736e-12
1960	-8.92262	1.53763e-12	3.74608e-12
124976	-8.91727	1.56957e-12	3.81737e-12
64847	8.91435	1.58731e-12	3.85688e-12
84129	-8.91216	1.60073e-12	3.8867e-12
26520	8.91159	1.60424e-12	3.89448e-12
147694	-8.90566	1.64122e-12	3.97643e-12
57002	8.90165	1.66672e-12	4.03274e-12
220979	-8.90124	1.66932e-12	4.03849e-12
54463	-8.89728	1.69497e-12	4.09495e-12
4211	-8.8959	1.70401e-12	4.11481e-12
5888	8.89586	1.70426e-12	4.11536e-12
116225	8.88977	1.74462e-12	4.20385e-12
28514	-8.88976	1.74472e-12	4.20405e-12
3835	8.88888	1.7506e-12	4.21693e-12
136647	8.8877	1.75854e-12	4.23427e-12
100133660	-8.8851	1.77622e-12	4.27285e-12
6964	-8.88454	1.78009e-12	4.28128e-12
163183	8.88335	1.78825e-12	4.29906e-12
10802	8.88012	1.81057e-12	4.3476e-12
158376	-8.87933	1.81612e-12	4.35965e-12
100132169	8.87887	1.81934e-12	4.36664e-12
23176	-8.8768	1.83385e-12	4.39809e-12
55721	8.87368	1.85597e-12	4.44598e-12
4528	8.87216	1.86685e-12	4.46949e-12
1805	-8.86955	1.88573e-12	4.51022e-12
84230	-8.86879	1.89125e-12	4.5221e-12
346689	-8.86779	1.89849e-12	4.53769e-12
25837	8.86737	1.90161e-12	4.54441e-12
6793	-8.86395	1.92679e-12	4.5985e-12
79829	8.85362	2.00488e-12	4.76539e-12
10960	8.84802	2.04858e-12	4.85818e-12
6327	-8.84798	2.04893e-12	4.85893e-12
140893	8.84356	2.08406e-12	4.93321e-12
6659	8.84189	2.0975e-12	4.96158e-12
113675	8.84093	2.10525e-12	4.97789e-12
5693	8.84002	2.11262e-12	4.99341e-12
29102	8.83981	2.11435e-12	4.99706e-12
6563	-8.83964	2.11572e-12	4.99994e-12
24141	8.83865	2.1238e-12	5.01693e-12
10811	8.83681	2.13894e-12	5.04873e-12
144501	8.83542	2.15037e-12	5.07272e-12
9173	-8.83508	2.15316e-12	5.07855e-12
10218	-8.83412	2.16113e-12	5.09525e-12
5987	8.83291	2.17126e-12	5.11646e-12
10040	8.83275	2.17258e-12	5.11922e-12
79922	8.83165	2.18181e-12	5.13852e-12
119559	8.82459	2.24188e-12	5.26515e-12
65263	8.82313	2.25457e-12	5.2918e-12
286827	8.81899	2.29076e-12	5.36766e-12
57648	8.81679	2.3103e-12	5.40852e-12
24137	8.81639	2.31387e-12	5.41596e-12
3953	-8.81441	2.33151e-12	5.45276e-12
5376	-8.80803	2.38955e-12	5.57343e-12
55165	8.80618	2.40665e-12	5.60886e-12
57217	-8.80097	2.45545e-12	5.70965e-12
3399	-8.80067	2.45826e-12	5.71543e-12
80305	8.80065	2.45844e-12	5.71581e-12
54345	-8.80064	2.45857e-12	5.71608e-12
64151	8.79865	2.47746e-12	5.75495e-12
253782	8.79844	2.47945e-12	5.75906e-12
580	8.79598	2.50308e-12	5.80759e-12
51043	8.79023	2.55907e-12	5.92216e-12
477	-8.79014	2.55997e-12	5.924e-12
4907	8.78996	2.56176e-12	5.92765e-12
23371	-8.78757	2.58545e-12	5.97593e-12
148304	8.78715	2.58965e-12	5.98449e-12
22880	8.78664	2.59479e-12	5.99494e-12
8787	-8.78164	2.64526e-12	6.09737e-12
11335	8.78103	2.65141e-12	6.10983e-12
378708	8.7808	2.65384e-12	6.11475e-12
253827	-8.78001	2.66193e-12	6.13111e-12
29929	8.77933	2.66893e-12	6.14526e-12
221504	8.77837	2.6788e-12	6.16518e-12
219539	-8.77661	2.69701e-12	6.20192e-12
2040	-8.77541	2.70948e-12	6.22705e-12
23193	8.772	2.74537e-12	6.29917e-12
9069	8.76989	2.76776e-12	6.34405e-12
1472	8.76555	2.81445e-12	6.43734e-12
5373	8.76543	2.81569e-12	6.43981e-12
57653	-8.76517	2.8186e-12	6.44561e-12
56886	8.76039	2.87095e-12	6.54969e-12
2195	8.75965	2.8792e-12	6.56605e-12
8861	8.75582	2.92204e-12	6.6508e-12
6944	8.75448	2.93716e-12	6.68063e-12
118	-8.75286	2.95549e-12	6.71674e-12
3601	-8.75226	2.96237e-12	6.73027e-12
80345	8.75167	2.96907e-12	6.74345e-12
5858	-8.75053	2.98222e-12	6.76931e-12
10282	8.74838	3.007e-12	6.81791e-12
89845	8.74775	3.01433e-12	6.83225e-12
55143	8.74765	3.01546e-12	6.83447e-12
26011	8.74623	3.03199e-12	6.86682e-12
8260	8.74536	3.04229e-12	6.88693e-12
222962	8.74523	3.04374e-12	6.88977e-12
2677	8.74494	3.04715e-12	6.89643e-12
57001	8.74431	3.05457e-12	6.91091e-12
10067	8.74358	3.06325e-12	6.92782e-12
4045	-8.7425	3.07599e-12	6.95265e-12
54935	8.73775	3.13281e-12	7.06376e-12
1012	-8.73721	3.13934e-12	7.07649e-12
55816	8.73407	3.17757e-12	7.1509e-12
84306	8.73406	3.17774e-12	7.15122e-12
55226	8.7338	3.18089e-12	7.15734e-12
5919	-8.72963	3.23244e-12	7.25725e-12
1028	-8.72738	3.26062e-12	7.31169e-12
10897	8.72696	3.26589e-12	7.32186e-12
54893	-8.72524	3.28764e-12	7.36375e-12
10659	-8.72478	3.29348e-12	7.375e-12
2274	8.72406	3.30267e-12	7.39268e-12
10615	8.72158	3.33435e-12	7.45349e-12
57026	8.7214	3.33667e-12	7.45794e-12
84848	8.72134	3.33747e-12	7.45947e-12
79618	-8.72075	3.34514e-12	7.47417e-12
5163	8.71792	3.38182e-12	7.5482e-12
146225	-8.71619	3.40443e-12	7.59376e-12
1066	-8.71242	3.45432e-12	7.69406e-12
51249	8.70873	3.50385e-12	7.79336e-12
10245	8.70714	3.52541e-12	7.83649e-12
6631	8.70667	3.53181e-12	7.84929e-12
57143	8.70663	3.53234e-12	7.85035e-12
80323	-8.69924	3.63447e-12	8.05844e-12
151011	-8.69855	3.64421e-12	8.07823e-12
219749	-8.69839	3.64645e-12	8.08279e-12
23197	8.69708	3.66501e-12	8.12047e-12
222663	8.68318	3.86699e-12	8.5339e-12
4751	8.68254	3.87656e-12	8.5534e-12
11099	-8.67715	3.95795e-12	8.71901e-12
79169	8.67636	3.97011e-12	8.74371e-12
124801	8.67149	4.04539e-12	8.89633e-12
51004	8.67116	4.05058e-12	8.90684e-12
9710	-8.66642	4.12532e-12	9.05789e-12
51155	8.66458	4.15472e-12	9.1172e-12
6472	8.6645	4.15613e-12	9.12004e-12
55061	8.66312	4.17831e-12	9.16473e-12
55733	8.66215	4.19401e-12	9.19633e-12
7298	8.66147	4.20503e-12	9.2185e-12
9218	-8.6595	4.23702e-12	9.28283e-12
23035	-8.65896	4.24591e-12	9.30068e-12
64960	8.65624	4.29077e-12	9.39071e-12
7128	-8.65018	4.39228e-12	9.59386e-12
126014	-8.64833	4.42389e-12	9.65695e-12
8318	8.64728	4.44177e-12	9.6926e-12
166815	8.64639	4.45711e-12	9.72317e-12
3811	-8.6424	4.52635e-12	9.86091e-12
90527	-8.64172	4.53827e-12	9.88458e-12
1843	-8.64045	4.56054e-12	9.9288e-12
4141	8.63753	4.6123e-12	1.00314e-11
348995	8.63513	4.65529e-12	1.01164e-11
51762	-8.6344	4.66837e-12	1.01423e-11
147015	8.6322	4.70821e-12	1.0221e-11
7070	8.62817	4.78217e-12	1.03666e-11
26112	-8.62803	4.78469e-12	1.03716e-11
7071	-8.62469	4.84688e-12	1.04938e-11
63897	8.62438	4.85253e-12	1.05049e-11
1478	8.62425	4.85497e-12	1.05097e-11
222643	8.62135	4.90975e-12	1.06173e-11
55732	8.61702	4.99254e-12	1.07797e-11
899	8.61683	4.99635e-12	1.07871e-11
112950	8.61412	5.04884e-12	1.08898e-11
283209	8.61319	5.06705e-12	1.09253e-11
27102	8.60511	5.22764e-12	1.12379e-11
6440	-8.605	5.23e-12	1.12425e-11
79870	-8.60339	5.26254e-12	1.13056e-11
65078	8.60131	5.30503e-12	1.13878e-11
55971	8.60003	5.33135e-12	1.14387e-11
51650	8.59587	5.41785e-12	1.16057e-11
57175	8.59233	5.49238e-12	1.17491e-11
9729	-8.59225	5.49418e-12	1.17525e-11
2806	8.59225	5.4942e-12	1.17526e-11
1186	8.59164	5.5071e-12	1.17774e-11
23522	-8.59155	5.50902e-12	1.1781e-11
91703	8.59067	5.52774e-12	1.1817e-11
131583	-8.58513	5.64736e-12	1.20461e-11
23120	8.58451	5.66107e-12	1.20723e-11
79154	8.58178	5.72111e-12	1.21869e-11
51060	8.57925	5.77736e-12	1.2294e-11
9088	8.57822	5.80025e-12	1.23375e-11
85236	8.57682	5.83184e-12	1.23975e-11
10430	8.57584	5.85396e-12	1.24395e-11
9055	8.57474	5.87885e-12	1.24867e-11
8711	8.57149	5.95329e-12	1.26276e-11
89970	8.56987	5.99077e-12	1.26984e-11
6332	-8.56874	6.01696e-12	1.27477e-11
10653	8.56683	6.06146e-12	1.28316e-11
116841	8.56535	6.09628e-12	1.28971e-11
134145	8.56468	6.11211e-12	1.29268e-11
128346	-8.56238	6.16672e-12	1.30294e-11
4234	8.56128	6.19291e-12	1.30784e-11
84057	8.55897	6.24862e-12	1.31827e-11
55082	-8.5563	6.31339e-12	1.33037e-11
55022	-8.55582	6.32524e-12	1.33258e-11
64979	8.55421	6.36458e-12	1.33991e-11
27044	8.55377	6.37556e-12	1.34195e-11
6723	8.55273	6.40125e-12	1.34673e-11
2070	-8.54848	6.50731e-12	1.36675e-11
11004	8.5468	6.54985e-12	1.37476e-11
10288	-8.54554	6.58176e-12	1.38077e-11
64793	8.54546	6.58385e-12	1.38116e-11
84986	-8.54265	6.65566e-12	1.39484e-11
415	8.53936	6.741e-12	1.41105e-11
6809	-8.53784	6.78086e-12	1.41861e-11
10160	8.53634	6.8203e-12	1.42608e-11
2041	8.53287	6.91226e-12	1.44348e-11
439921	-8.53278	6.91478e-12	1.44395e-11
79774	8.5292	7.01121e-12	1.46214e-11
4056	-8.52837	7.03374e-12	1.46638e-11
1441	-8.52778	7.04997e-12	1.46944e-11
4487	-8.52235	7.1996e-12	1.49779e-11
51016	8.52133	7.22808e-12	1.50317e-11
6894	8.52054	7.25024e-12	1.50736e-11
1850	-8.51837	7.31123e-12	1.51887e-11
2990	8.51669	7.35889e-12	1.52785e-11
328	8.5134	7.45317e-12	1.54559e-11
4641	-8.51045	7.53872e-12	1.56165e-11
22900	-8.51027	7.5442e-12	1.56267e-11
3159	8.50816	7.60586e-12	1.57423e-11
169200	-8.50788	7.61424e-12	1.57579e-11
94081	8.50123	7.81285e-12	1.61294e-11
1361	-8.5009	7.82285e-12	1.6148e-11
6382	8.50063	7.8308e-12	1.61628e-11
285043	-8.49869	7.88995e-12	1.6273e-11
7167	8.49616	7.96763e-12	1.64176e-11
4320	8.48935	8.18049e-12	1.68121e-11
9398	-8.48897	8.1925e-12	1.68343e-11
100133941	8.48724	8.24739e-12	1.69357e-11
80745	8.48652	8.27064e-12	1.69786e-11
79007	8.48592	8.28972e-12	1.70138e-11
8807	-8.48245	8.40184e-12	1.72202e-11
23464	8.48232	8.40605e-12	1.7228e-11
79614	-8.48038	8.46956e-12	1.73446e-11
221692	-8.4802	8.47549e-12	1.73555e-11
56474	8.47725	8.57265e-12	1.75336e-11
79794	-8.47708	8.5784e-12	1.75442e-11
2058	8.47675	8.5894e-12	1.75643e-11
79683	-8.47376	8.68946e-12	1.77479e-11
6182	8.47221	8.74163e-12	1.78434e-11
9020	-8.47128	8.7732e-12	1.79012e-11
306	-8.4673	8.90972e-12	1.81504e-11
5322	-8.45853	9.21734e-12	1.87091e-11
63877	-8.45702	9.27143e-12	1.8807e-11
9898	8.45679	9.27984e-12	1.88222e-11
27092	-8.45583	9.31428e-12	1.88844e-11
170371	-8.45486	9.34922e-12	1.89474e-11
768211	-8.45469	9.35538e-12	1.89585e-11
23759	8.45337	9.40333e-12	1.9045e-11
55342	8.45325	9.40773e-12	1.90529e-11
64332	-8.45015	9.5216e-12	1.92578e-11
2624	-8.4482	9.59359e-12	1.9387e-11
284361	8.44607	9.67334e-12	1.95299e-11
8850	-8.44208	9.82385e-12	1.9799e-11
4201	8.44029	9.89217e-12	1.99208e-11
653639	8.43997	9.90458e-12	1.99429e-11
84513	8.43909	9.93823e-12	2.00028e-11
121227	8.43889	9.94601e-12	2.00166e-11
55215	8.43526	1.00868e-11	2.02666e-11
51596	8.43514	1.00918e-11	2.02754e-11
55802	-8.43475	1.01069e-11	2.03023e-11
683	-8.43058	1.02717e-11	2.05938e-11
64840	8.43031	1.02822e-11	2.06123e-11
7226	8.42936	1.03201e-11	2.06792e-11
221927	8.42713	1.04097e-11	2.08371e-11
8833	8.42572	1.04669e-11	2.09377e-11
440335	8.42505	1.0494e-11	2.09854e-11
440603	8.42478	1.0505e-11	2.10046e-11
6119	8.42275	1.05877e-11	2.11498e-11
84661	8.42269	1.05905e-11	2.11546e-11
8291	-8.42039	1.06853e-11	2.13206e-11
9641	8.42032	1.06881e-11	2.13255e-11
5480	8.4203	1.06891e-11	2.13272e-11
3065	8.41834	1.07706e-11	2.14696e-11
5588	-8.41751	1.08051e-11	2.15298e-11
9592	-8.41499	1.09113e-11	2.17147e-11
4974	-8.40911	1.11626e-11	2.21507e-11
8336	8.40902	1.11667e-11	2.21578e-11
2259	-8.40864	1.11829e-11	2.21858e-11
158584	8.40809	1.12069e-11	2.22273e-11
3678	-8.40593	1.13012e-11	2.23901e-11
51321	8.40557	1.13167e-11	2.24168e-11
23210	-8.40467	1.13564e-11	2.24851e-11
135	-8.40392	1.13894e-11	2.25419e-11
25802	-8.40284	1.14373e-11	2.26243e-11
5155	-8.40085	1.15259e-11	2.27765e-11
79081	8.39742	1.168e-11	2.30404e-11
120425	-8.39474	1.18023e-11	2.32491e-11
5192	8.39134	1.19589e-11	2.35155e-11
132203	-8.39025	1.20094e-11	2.36013e-11
64097	-8.38827	1.21019e-11	2.3758e-11
55572	8.38793	1.21179e-11	2.37851e-11
144110	8.3879	1.21193e-11	2.37875e-11
84948	8.38775	1.21264e-11	2.37995e-11
2873	8.38773	1.21271e-11	2.38007e-11
55357	-8.38701	1.21613e-11	2.38585e-11
26995	8.38643	1.21886e-11	2.39046e-11
79723	8.38378	1.23145e-11	2.41171e-11
27173	8.38224	1.2388e-11	2.42407e-11
2630	8.38193	1.2403e-11	2.4266e-11
3838	8.38174	1.2412e-11	2.42811e-11
9052	-8.38087	1.2454e-11	2.43516e-11
6804	8.38032	1.24805e-11	2.43962e-11
6391	8.3766	1.26622e-11	2.47006e-11
84105	8.37569	1.2707e-11	2.47754e-11
6279	-8.37457	1.27619e-11	2.48669e-11
114904	8.37411	1.27848e-11	2.49051e-11
8910	-8.37323	1.28284e-11	2.49777e-11
57447	-8.37316	1.28323e-11	2.49843e-11
2146	8.37286	1.2847e-11	2.50088e-11
553158	8.37087	1.29466e-11	2.51786e-11
3068	8.36941	1.30201e-11	2.53038e-11
3692	8.3687	1.30561e-11	2.5365e-11
90427	8.36508	1.32408e-11	2.56905e-11
5099	8.36324	1.33355e-11	2.58571e-11
3418	8.36207	1.33958e-11	2.5963e-11
2107	-8.36132	1.34352e-11	2.60322e-11
92342	8.35882	1.3566e-11	2.62627e-11
11164	8.35479	1.37794e-11	2.66381e-11
27352	8.35274	1.38894e-11	2.6831e-11
10276	8.35252	1.39013e-11	2.68519e-11
21	-8.35193	1.39332e-11	2.69078e-11
10865	-8.34189	1.44866e-11	2.78885e-11
8100	-8.33893	1.46541e-11	2.81841e-11
10509	8.33765	1.47273e-11	2.83131e-11
3654	8.33531	1.48613e-11	2.85489e-11
10223	-8.33404	1.49348e-11	2.86783e-11
5634	8.33378	1.49497e-11	2.87044e-11
51608	8.33086	1.51202e-11	2.90038e-11
10053	8.32921	1.52174e-11	2.91742e-11
7225	-8.3281	1.52827e-11	2.92884e-11
5962	-8.32695	1.5351e-11	2.94081e-11
79801	8.32316	1.55784e-11	2.98054e-11
11116	8.32286	1.5597e-11	2.98377e-11
84959	-8.32185	1.56582e-11	2.99446e-11
89941	8.31545	1.60519e-11	3.06293e-11
147841	8.31211	1.62612e-11	3.09921e-11
80237	8.31203	1.62661e-11	3.10005e-11
6910	-8.30283	1.68574e-11	3.20209e-11
64755	8.30223	1.68971e-11	3.20893e-11
54828	-8.30152	1.69434e-11	3.21689e-11
10101	8.30115	1.69681e-11	3.22112e-11
403341	-8.29885	1.71198e-11	3.24716e-11
8706	-8.29837	1.71517e-11	3.25263e-11
5829	-8.29769	1.71972e-11	3.26042e-11
5730	-8.29741	1.72158e-11	3.26361e-11
10491	-8.29608	1.73048e-11	3.27885e-11
727787	-8.29547	1.73464e-11	3.28596e-11
54478	8.2934	1.74864e-11	3.30989e-11
2810	8.29278	1.75281e-11	3.31701e-11
64376	-8.29059	1.76778e-11	3.34256e-11
115290	-8.2895	1.77529e-11	3.35533e-11
6320	8.28902	1.77857e-11	3.36093e-11
54953	8.28666	1.79493e-11	3.38875e-11
54839	-8.28501	1.80648e-11	3.40837e-11
54620	8.28416	1.81247e-11	3.41852e-11
81620	8.28398	1.81371e-11	3.42063e-11
79947	8.28006	1.84157e-11	3.46779e-11
285378	-8.27924	1.84743e-11	3.47769e-11
8530	-8.2787	1.85126e-11	3.48416e-11
146857	8.27769	1.85856e-11	3.49646e-11
27344	8.2768	1.865e-11	3.50733e-11
95681	8.27624	1.86906e-11	3.51418e-11
25853	8.26977	1.91664e-11	3.59537e-11
139818	-8.26802	1.9297e-11	3.61757e-11
1071	-8.25715	2.01287e-11	3.75843e-11
2353	-8.25667	2.01663e-11	3.76478e-11
201627	-8.25522	2.02798e-11	3.7839e-11
79763	8.25478	2.03147e-11	3.78977e-11
5579	-8.25332	2.04306e-11	3.80928e-11
91775	-8.25124	2.05965e-11	3.83715e-11
22872	8.2502	2.06796e-11	3.8511e-11
127687	8.24547	2.10632e-11	3.91534e-11
131578	8.24254	2.1304e-11	3.95556e-11
81037	8.24086	2.14438e-11	3.97886e-11
2705	8.24067	2.14589e-11	3.98136e-11
10982	-8.2403	2.14902e-11	3.98657e-11
5033	8.24002	2.15132e-11	3.9904e-11
112817	-8.23977	2.15347e-11	3.99398e-11
983	8.23938	2.15668e-11	3.99932e-11
51121	8.23843	2.16472e-11	4.01269e-11
8493	-8.23713	2.17562e-11	4.0308e-11
2313	-8.23705	2.17632e-11	4.03198e-11
7272	8.23392	2.20292e-11	4.07609e-11
51175	-8.23192	2.22015e-11	4.1046e-11
79717	8.23177	2.2214e-11	4.10667e-11
158158	8.23159	2.22298e-11	4.10927e-11
9172	-8.2314	2.22464e-11	4.11202e-11
7469	8.22783	2.25564e-11	4.16319e-11
153579	-8.22645	2.26784e-11	4.18328e-11
5939	-8.22445	2.28552e-11	4.21237e-11
5111	8.22362	2.29287e-11	4.22443e-11
100132074	8.22297	2.29864e-11	4.2339e-11
8751	8.22259	2.30205e-11	4.2395e-11
2968	8.22212	2.30628e-11	4.24645e-11
55958	-8.22163	2.31064e-11	4.2536e-11
5990	-8.22036	2.32209e-11	4.27235e-11
4312	8.21703	2.35229e-11	4.32275e-11
8208	8.21428	2.37757e-11	4.36485e-11
10256	8.21392	2.38091e-11	4.3704e-11
10295	8.21338	2.38594e-11	4.37877e-11
25973	8.20965	2.42076e-11	4.43656e-11
79064	8.20853	2.4313e-11	4.45403e-11
80179	8.20713	2.44459e-11	4.47603e-11
80142	8.20306	2.48357e-11	4.54043e-11
23031	-8.20203	2.4935e-11	4.5568e-11
5549	-8.19765	2.53631e-11	4.62724e-11
1465	-8.19696	2.54308e-11	4.63836e-11
5241	-8.19671	2.54564e-11	4.64257e-11
7099	-8.19602	2.55242e-11	4.65368e-11
5709	8.19205	2.5921e-11	4.71869e-11
79711	8.19048	2.60795e-11	4.74459e-11
55355	8.1869	2.64453e-11	4.80427e-11
25880	8.18115	2.70432e-11	4.90143e-11
59274	-8.18106	2.70523e-11	4.9029e-11
9820	8.18034	2.71278e-11	4.91513e-11
9980	8.17885	2.72854e-11	4.94065e-11
84231	8.17439	2.77631e-11	5.0178e-11
3783	8.17398	2.78069e-11	5.02486e-11
54955	8.17361	2.78471e-11	5.03135e-11
79962	8.17357	2.78514e-11	5.03203e-11
4332	-8.17328	2.78835e-11	5.03721e-11
28956	8.17321	2.78905e-11	5.03834e-11
3398	-8.17286	2.7929e-11	5.04453e-11
81894	-8.17246	2.7972e-11	5.05146e-11
5140	-8.16876	2.83772e-11	5.11657e-11
10133	-8.16692	2.85808e-11	5.14921e-11
55210	8.16522	2.87702e-11	5.17953e-11
7356	-8.16348	2.89654e-11	5.21074e-11
26040	-8.16313	2.90048e-11	5.21703e-11
57232	8.16232	2.90964e-11	5.23165e-11
3659	-8.16095	2.92524e-11	5.25653e-11
90861	8.15639	2.97755e-11	5.33972e-11
23143	-8.1561	2.98084e-11	5.34494e-11
1371	8.15169	3.03247e-11	5.4267e-11
79733	8.14934	3.06028e-11	5.4706e-11
5593	-8.14888	3.06572e-11	5.47919e-11
55353	8.14888	3.06575e-11	5.47923e-11
3002	-8.14744	3.08297e-11	5.50636e-11
81928	8.14672	3.09158e-11	5.51991e-11
10196	8.14643	3.0951e-11	5.52545e-11
51495	8.14548	3.10661e-11	5.54354e-11
847	-8.14535	3.10818e-11	5.54602e-11
6635	8.1445	3.11837e-11	5.56203e-11
27042	8.14411	3.12316e-11	5.56953e-11
112937	8.143	3.13668e-11	5.59074e-11
26578	-8.14248	3.143e-11	5.60065e-11
55824	-8.14084	3.16306e-11	5.63207e-11
25886	8.14069	3.16491e-11	5.63495e-11
128869	8.14003	3.17309e-11	5.64775e-11
25807	8.13932	3.18183e-11	5.66142e-11
3590	-8.13749	3.20465e-11	5.69714e-11
81027	-8.13631	3.21933e-11	5.72009e-11
26234	-8.13426	3.24511e-11	5.76032e-11
9411	-8.13384	3.25041e-11	5.76859e-11
54508	-8.13149	3.28025e-11	5.81505e-11
10922	8.13131	3.2826e-11	5.81871e-11
27339	8.1278	3.32762e-11	5.88859e-11
6495	8.12705	3.33738e-11	5.90372e-11
79742	-8.12428	3.37348e-11	5.95954e-11
51027	8.12391	3.37842e-11	5.96718e-11
8778	-8.12305	3.38973e-11	5.98463e-11
11311	8.12231	3.39943e-11	5.99958e-11
54867	8.12046	3.42405e-11	6.0375e-11
79005	8.12042	3.42455e-11	6.03827e-11
56005	8.1198	3.43276e-11	6.0509e-11
4486	8.11897	3.44391e-11	6.06803e-11
23136	-8.11783	3.45927e-11	6.09163e-11
22849	-8.11672	3.47423e-11	6.11457e-11
9928	8.11289	3.52636e-11	6.19707e-11
51604	8.11059	3.55804e-11	6.2471e-11
55203	8.10456	3.64247e-11	6.37996e-11
80025	-8.10289	3.66619e-11	6.41717e-11
25825	8.10268	3.6692e-11	6.42189e-11
10799	8.10182	3.68144e-11	6.44107e-11
147949	-8.10167	3.68372e-11	6.44464e-11
64841	8.10153	3.68573e-11	6.44778e-11
100133775	8.09832	3.73199e-11	6.52015e-11
389072	-8.09827	3.73274e-11	6.52131e-11
338758	-8.09617	3.76332e-11	6.56903e-11
554	-8.09556	3.77232e-11	6.58306e-11
5473	-8.09422	3.79194e-11	6.61361e-11
2821	8.09388	3.79703e-11	6.62154e-11
26521	8.09232	3.82004e-11	6.65733e-11
730394	8.09057	3.84619e-11	6.69794e-11
64801	8.0895	3.8623e-11	6.72292e-11
8642	-8.08871	3.87407e-11	6.74116e-11
240	-8.08424	3.94216e-11	6.84646e-11
128434	8.08371	3.95019e-11	6.85885e-11
642475	8.08246	3.96953e-11	6.88867e-11
10610	-8.08212	3.97476e-11	6.89674e-11
54606	8.08161	3.98266e-11	6.9089e-11
9282	8.08002	4.00741e-11	6.94699e-11
23327	-8.07865	4.02884e-11	6.97992e-11
6690	8.07822	4.03547e-11	6.9901e-11
1163	8.07772	4.04345e-11	7.00235e-11
898	8.07605	4.06979e-11	7.04378e-11
56521	8.07135	4.14479e-11	7.16325e-11
51497	8.06785	4.20166e-11	7.25361e-11
79087	8.06775	4.20336e-11	7.25631e-11
3045	-8.06716	4.21305e-11	7.27168e-11
59353	-8.06443	4.25801e-11	7.34293e-11
1019	8.06358	4.27203e-11	7.36513e-11
440995	8.05635	4.39407e-11	7.55784e-11
3028	8.05409	4.43282e-11	7.61884e-11
8906	8.05344	4.44414e-11	7.63666e-11
9453	8.05103	4.48592e-11	7.70229e-11
200035	8.04927	4.51685e-11	7.75083e-11
55653	8.0485	4.5303e-11	7.7719e-11
79611	-8.043	4.62835e-11	7.92528e-11
1893	8.03885	4.70371e-11	8.04278e-11
6505	-8.03706	4.73659e-11	8.09394e-11
390	-8.03422	4.78924e-11	8.17573e-11
5710	8.02742	4.91779e-11	8.37473e-11
6252	-8.0273	4.92006e-11	8.37824e-11
56729	-8.02705	4.92493e-11	8.38575e-11
8187	8.02527	4.95914e-11	8.43854e-11
83478	-8.02451	4.97385e-11	8.46122e-11
4323	8.02397	4.98427e-11	8.47728e-11
8994	-8.02258	5.01128e-11	8.51886e-11
5058	8.02178	5.027e-11	8.54304e-11
6925	-8.0159	5.14326e-11	8.72144e-11
4122	-8.01483	5.16485e-11	8.75449e-11
6447	8.0142	5.17738e-11	8.77366e-11
399818	-8.0142	5.17753e-11	8.77388e-11
387119	-8.01076	5.2472e-11	8.88029e-11
51106	8.00817	5.30049e-11	8.96149e-11
2675	-8.00804	5.30314e-11	8.96551e-11
55667	-8.00631	5.33895e-11	9.01999e-11
2517	8.00304	5.40743e-11	9.12394e-11
284018	8.00287	5.41091e-11	9.1292e-11
1524	-8.00275	5.41362e-11	9.13332e-11
51752	-8.00232	5.4225e-11	9.14678e-11
646962	-8.0022	5.42512e-11	9.15075e-11
4919	-8.0022	5.42518e-11	9.15083e-11
201625	-7.99912	5.49058e-11	9.2498e-11
9839	-7.99908	5.49133e-11	9.25093e-11
150094	-7.99784	5.51799e-11	9.29121e-11
79152	7.9972	5.5317e-11	9.3119e-11
79442	-7.99659	5.545e-11	9.33196e-11
5427	7.99472	5.58548e-11	9.39297e-11
10289	-7.99436	5.59326e-11	9.40468e-11
100131683	-7.99343	5.61368e-11	9.43541e-11
150967	-7.9909	5.66913e-11	9.51874e-11
728052	-7.99065	5.67474e-11	9.52717e-11
55706	7.9893	5.7047e-11	9.5721e-11
3575	-7.98832	5.72646e-11	9.60471e-11
10000	-7.98758	5.74284e-11	9.62925e-11
128308	7.98704	5.75503e-11	9.6475e-11
23762	7.98406	5.82217e-11	9.74784e-11
282679	7.9838	5.82799e-11	9.75653e-11
8605	-7.98345	5.83613e-11	9.76868e-11
8871	7.9801	5.91271e-11	9.88277e-11
730	-7.9792	5.93355e-11	9.91376e-11
120071	7.97649	5.99631e-11	1.00069e-10
10365	-7.97631	6.00069e-11	1.00134e-10
516	7.97304	6.07748e-11	1.01271e-10
4605	7.97242	6.09225e-11	1.0149e-10
284367	-7.97214	6.0988e-11	1.01587e-10
26502	7.97201	6.10205e-11	1.01634e-10
153339	7.97149	6.11427e-11	1.01815e-10
113655	7.97055	6.13672e-11	1.02146e-10
54535	7.96971	6.15678e-11	1.02442e-10
1196	7.96889	6.17665e-11	1.02735e-10
57592	7.96696	6.22323e-11	1.03421e-10
81931	7.96671	6.22919e-11	1.03508e-10
83853	-7.96661	6.23154e-11	1.03543e-10
22883	7.96055	6.38053e-11	1.05727e-10
51523	7.96004	6.39309e-11	1.05911e-10
257000	-7.95725	6.46315e-11	1.06934e-10
332	7.95583	6.49881e-11	1.07453e-10
57570	7.95484	6.524e-11	1.0782e-10
29126	-7.95445	6.53397e-11	1.07964e-10
90990	7.95422	6.53966e-11	1.08047e-10
29920	7.95168	6.60473e-11	1.08992e-10
51264	7.95159	6.60714e-11	1.09027e-10
134429	-7.94923	6.66811e-11	1.0991e-10
64428	7.94786	6.70388e-11	1.10427e-10
51287	7.94758	6.71108e-11	1.10531e-10
25974	7.94611	6.74954e-11	1.11086e-10
11200	7.94509	6.77659e-11	1.11476e-10
51316	-7.94422	6.79954e-11	1.11807e-10
2531	-7.94389	6.80816e-11	1.11931e-10
10280	7.94353	6.81795e-11	1.12072e-10
116832	7.94276	6.8383e-11	1.12365e-10
3400	-7.94248	6.84575e-11	1.12472e-10
4801	-7.94167	6.86751e-11	1.12784e-10
100287616	7.9412	6.88004e-11	1.12964e-10
7421	7.93849	6.95308e-11	1.14011e-10
5743	-7.93846	6.95378e-11	1.14021e-10
283358	7.93747	6.98078e-11	1.14408e-10
399949	-7.93656	7.00541e-11	1.1476e-10
51256	7.93577	7.02724e-11	1.15072e-10
26054	-7.93314	7.09957e-11	1.1612e-10
22905	-7.93268	7.11218e-11	1.16302e-10
27297	7.92978	7.193e-11	1.17469e-10
53844	-7.92925	7.20777e-11	1.17682e-10
83543	-7.92919	7.2096e-11	1.17708e-10
9723	-7.92832	7.23406e-11	1.18061e-10
83878	-7.92583	7.30461e-11	1.19079e-10
81792	7.9255	7.31403e-11	1.19215e-10
343637	-7.92448	7.34322e-11	1.19635e-10
79935	7.92296	7.38661e-11	1.20259e-10
9894	7.92215	7.41003e-11	1.20596e-10
548593	7.92002	7.47168e-11	1.21485e-10
5296	7.91626	7.58197e-11	1.23071e-10
10019	-7.91496	7.62046e-11	1.23623e-10
51373	7.91373	7.65729e-11	1.24151e-10
727738	-7.91165	7.7196e-11	1.25043e-10
5537	-7.91073	7.74712e-11	1.25436e-10
11187	7.91072	7.74758e-11	1.25442e-10
6499	7.9083	7.82106e-11	1.26491e-10
65983	7.90818	7.8246e-11	1.26541e-10
9706	-7.90791	7.83278e-11	1.26658e-10
2191	7.90703	7.85986e-11	1.27044e-10
4237	7.90599	7.89174e-11	1.27497e-10
908	7.90389	7.95646e-11	1.28417e-10
2305	7.9038	7.95915e-11	1.28455e-10
9625	-7.90376	7.9604e-11	1.28473e-10
57876	7.90267	7.99438e-11	1.28955e-10
3491	-7.89925	8.10173e-11	1.30506e-10
63979	7.89778	8.14818e-11	1.31176e-10
9869	7.89746	8.15848e-11	1.31324e-10
9107	-7.89435	8.25772e-11	1.32752e-10
84934	7.89347	8.28622e-11	1.33161e-10
4288	7.8911	8.36316e-11	1.34265e-10
83891	-7.88954	8.41419e-11	1.34996e-10
678	-7.88952	8.41471e-11	1.35003e-10
4133	-7.88927	8.42297e-11	1.35122e-10
285758	-7.88738	8.48531e-11	1.36013e-10
84897	-7.88674	8.50655e-11	1.36316e-10
115207	-7.88527	8.55525e-11	1.37011e-10
144809	-7.88433	8.58656e-11	1.37458e-10
56849	-7.87981	8.73917e-11	1.39628e-10
730052	7.87941	8.75301e-11	1.39824e-10
64407	-7.87938	8.75411e-11	1.3984e-10
148066	7.8791	8.76365e-11	1.39975e-10
55759	7.87903	8.76598e-11	1.40008e-10
9556	7.87538	8.8916e-11	1.41807e-10
79896	7.87484	8.91015e-11	1.42073e-10
55859	-7.87371	8.94963e-11	1.42637e-10
64764	7.87358	8.95409e-11	1.427e-10
84069	7.86951	9.09746e-11	1.44774e-10
3090	-7.86673	9.19657e-11	1.46203e-10
51728	7.86602	9.22182e-11	1.46567e-10
63943	7.86545	9.24235e-11	1.46863e-10
55238	7.86408	9.29186e-11	1.47575e-10
25923	7.8619	9.37124e-11	1.48716e-10
3925	7.86162	9.38158e-11	1.48864e-10
729810	7.85901	9.47721e-11	1.50236e-10
84910	7.85318	9.69519e-11	1.53353e-10
79001	7.85231	9.72817e-11	1.53823e-10
255812	7.85124	9.76869e-11	1.544e-10
11140	-7.85049	9.79753e-11	1.54811e-10
93183	7.85023	9.80749e-11	1.54953e-10
55120	7.8458	9.978e-11	1.57376e-10
10301	7.8448	1.0017e-10	1.57928e-10
84870	-7.84428	1.00375e-10	1.58219e-10
1030	-7.84408	1.00454e-10	1.5833e-10
284252	7.84393	1.00514e-10	1.58416e-10
845	-7.84213	1.0122e-10	1.59415e-10
6404	-7.84032	1.01936e-10	1.60427e-10
83716	-7.84013	1.0201e-10	1.60532e-10
85395	7.83973	1.02171e-10	1.60759e-10
84869	7.83726	1.0316e-10	1.62154e-10
3301	-7.8352	1.03991e-10	1.63324e-10
366	-7.83244	1.05118e-10	1.64907e-10
54802	7.83078	1.05798e-10	1.6586e-10
64949	7.83035	1.05975e-10	1.66109e-10
10403	7.8301	1.0608e-10	1.66255e-10
167681	-7.82924	1.06436e-10	1.66754e-10
57333	7.82915	1.06472e-10	1.66804e-10
16	7.82883	1.06608e-10	1.66994e-10
54707	7.82864	1.06685e-10	1.67102e-10
10279	7.82633	1.07652e-10	1.68468e-10
59335	-7.82474	1.08318e-10	1.69408e-10
54507	-7.82237	1.09327e-10	1.70829e-10
1058	7.82096	1.09928e-10	1.71675e-10
7555	-7.81654	1.11839e-10	1.74357e-10
80022	-7.81448	1.12739e-10	1.75617e-10
79573	7.81233	1.13691e-10	1.76947e-10
90488	7.81048	1.14514e-10	1.78095e-10
25962	-7.80965	1.14886e-10	1.78613e-10
3741	-7.80941	1.14992e-10	1.78761e-10
645431	7.80878	1.15274e-10	1.79155e-10
22914	-7.80854	1.15385e-10	1.79308e-10
25777	-7.80791	1.15669e-10	1.79704e-10
9976	-7.80552	1.1675e-10	1.81206e-10
27233	-7.80544	1.16787e-10	1.81258e-10
51142	7.80541	1.16801e-10	1.81277e-10
1033	7.80454	1.17197e-10	1.81827e-10
261726	7.80423	1.1734e-10	1.82025e-10
80723	-7.80191	1.18403e-10	1.83498e-10
92840	7.80137	1.18656e-10	1.83848e-10
114657	7.79991	1.19333e-10	1.84785e-10
56000	-7.79907	1.19724e-10	1.85325e-10
7869	-7.79796	1.20241e-10	1.86038e-10
3141	7.79352	1.22342e-10	1.88951e-10
126695	7.79137	1.23374e-10	1.90379e-10
254359	7.79007	1.24001e-10	1.91245e-10
221914	7.78838	1.24822e-10	1.92376e-10
1802	7.78665	1.25663e-10	1.93535e-10
50489	7.78664	1.25667e-10	1.93541e-10
9056	-7.78621	1.25881e-10	1.93834e-10
1763	7.78578	1.26092e-10	1.94125e-10
6340	-7.78337	1.27284e-10	1.95763e-10
56954	7.78265	1.2764e-10	1.96251e-10
10826	-7.78195	1.27988e-10	1.96729e-10
23518	7.78055	1.2869e-10	1.97689e-10
890	7.77872	1.29611e-10	1.9895e-10
23462	-7.77836	1.29793e-10	1.99199e-10
57130	7.77658	1.307e-10	2.00437e-10
1789	7.77561	1.31192e-10	2.01109e-10
26233	7.77512	1.31443e-10	2.01451e-10
22874	7.77509	1.31459e-10	2.01472e-10
541578	7.77252	1.32782e-10	2.03298e-10
4542	-7.7722	1.32947e-10	2.03527e-10
481	7.77	1.34093e-10	2.05104e-10
84320	7.76904	1.34599e-10	2.05801e-10
79924	7.7659	1.36259e-10	2.08081e-10
259173	-7.76539	1.36529e-10	2.08451e-10
9750	-7.76291	1.37856e-10	2.1027e-10
1128	-7.76265	1.37993e-10	2.10457e-10
6351	-7.76242	1.38119e-10	2.10629e-10
22873	-7.76091	1.38937e-10	2.11747e-10
144363	-7.75899	1.39977e-10	2.13168e-10
10652	7.75861	1.40188e-10	2.13456e-10
199745	7.75589	1.41684e-10	2.15493e-10
128602	-7.75298	1.43298e-10	2.17688e-10
1428	7.75284	1.43375e-10	2.17792e-10
56164	7.75239	1.43631e-10	2.1814e-10
51148	7.75044	1.44724e-10	2.19622e-10
83540	7.75007	1.44932e-10	2.19904e-10
10380	7.74728	1.46522e-10	2.22054e-10
55157	7.74703	1.46665e-10	2.22248e-10
29980	7.74618	1.47148e-10	2.229e-10
255520	7.74496	1.47855e-10	2.23854e-10
729238	-7.74487	1.47907e-10	2.23924e-10
8796	-7.74325	1.48842e-10	2.25184e-10
23367	7.74297	1.49005e-10	2.25403e-10
84658	-7.7383	1.51741e-10	2.29145e-10
57657	7.73771	1.52091e-10	2.29623e-10
54145	7.73708	1.52467e-10	2.30135e-10
5753	7.73613	1.53033e-10	2.30907e-10
84313	7.73399	1.54314e-10	2.32652e-10
50937	-7.7332	1.54796e-10	2.33307e-10
2591	7.73285	1.55006e-10	2.33593e-10
4091	-7.73195	1.55552e-10	2.34335e-10
89958	7.73038	1.56505e-10	2.3563e-10
9805	7.72881	1.57465e-10	2.36932e-10
152831	-7.72791	1.58019e-10	2.37684e-10
84951	7.72599	1.59208e-10	2.39303e-10
10084	7.72161	1.61952e-10	2.4303e-10
55723	7.7212	1.6221e-10	2.43379e-10
253980	7.72001	1.62966e-10	2.44404e-10
66008	-7.71992	1.63024e-10	2.44482e-10
9373	-7.7185	1.63926e-10	2.45703e-10
54845	7.71828	1.64069e-10	2.45897e-10
91624	-7.71582	1.65649e-10	2.48055e-10
732419	7.71427	1.66657e-10	2.49431e-10
55657	7.71296	1.67508e-10	2.5059e-10
2014	-7.71167	1.68354e-10	2.51742e-10
222256	-7.70647	1.71808e-10	2.56434e-10
199800	-7.70595	1.72153e-10	2.56901e-10
23533	-7.70375	1.73638e-10	2.58913e-10
54810	-7.70115	1.75406e-10	2.61303e-10
28968	-7.70092	1.75564e-10	2.61517e-10
7368	7.70041	1.75913e-10	2.61988e-10
969	-7.70012	1.76113e-10	2.62257e-10
4322	7.70007	1.76146e-10	2.62302e-10
56935	7.69792	1.7763e-10	2.64304e-10
3364	7.69663	1.78528e-10	2.65514e-10
401494	-7.69634	1.78728e-10	2.65783e-10
4092	-7.69534	1.79433e-10	2.66732e-10
57562	-7.69386	1.80466e-10	2.6813e-10
3397	-7.69086	1.82591e-10	2.71043e-10
23624	7.68933	1.83689e-10	2.72547e-10
2161	7.68865	1.84173e-10	2.73209e-10
9496	-7.6837	1.87765e-10	2.78116e-10
257062	-7.6815	1.89386e-10	2.80325e-10
359845	-7.68041	1.90194e-10	2.81425e-10
653450	-7.67602	1.93478e-10	2.85889e-10
4016	7.67385	1.95121e-10	2.88117e-10
170690	7.67184	1.96658e-10	2.90199e-10
54941	-7.66962	1.98367e-10	2.9251e-10
2771	-7.66943	1.98516e-10	2.92712e-10
7020	7.66888	1.98941e-10	2.93287e-10
638	7.66694	2.00452e-10	2.95327e-10
860	7.66447	2.02399e-10	2.97952e-10
406991	7.66439	2.02457e-10	2.9803e-10
2954	7.66434	2.02496e-10	2.98082e-10
1635	7.66388	2.02866e-10	2.98581e-10
338620	-7.66362	2.03066e-10	2.9885e-10
54830	7.6627	2.038e-10	2.99839e-10
2256	7.65966	2.06229e-10	3.03103e-10
6873	7.65723	2.08194e-10	3.05739e-10
55258	7.65488	2.10118e-10	3.08316e-10
93343	7.6548	2.10178e-10	3.08398e-10
1663	7.65238	2.12171e-10	3.11063e-10
57631	-7.65071	2.13563e-10	3.12921e-10
27101	7.64998	2.1417e-10	3.13732e-10
23400	7.64983	2.14293e-10	3.13896e-10
3753	-7.64976	2.14355e-10	3.13978e-10
10493	-7.64857	2.15354e-10	3.1531e-10
7259	-7.64481	2.18535e-10	3.19557e-10
51538	7.64466	2.18667e-10	3.19734e-10
83871	7.64413	2.19113e-10	3.20328e-10
391632	-7.64263	2.20401e-10	3.22044e-10
80023	7.63931	2.23274e-10	3.25866e-10
4327	-7.63897	2.23573e-10	3.26263e-10
[truncated: 8,939 more rows]

## Sheet: sGSCA.lungC
pairid	#genes(n.set1,n.set2,n.overlap)	GSCoL	pvalue	fdr
hsa04110---hsa04115	74,43,17	3.17424	0	0
hsa04621---hsa04660	45,60,11	2.80927	0	0
hsa04620---hsa04660	59,60,25	2.6858	0.0001	0.0074571
hsa04062---hsa04630	115,74,11	2.55921	0.0001	0.0074571
hsa04060---hsa04660	153,60,3	2.52265	0.0001	0.0074571
hsa04660---hsa04630	60,74,12	2.51867	0.0002	0.0124285
hsa04664---hsa04620	45,59,21	2.36285	0.0007	0.0314165
hsa04664---hsa04062	45,115,19	2.25518	0.0007	0.0314165
hsa04514---hsa04630	79,74,0	2.45032	0.0009	0.0363534
hsa04620---hsa04514	59,79,1	2.35981	0.0015	0.0466069
hsa04664---hsa04514	45,79,0	2.29762	0.0015	0.0466069
hsa04660---hsa04062	60,115,23	2.17165	0.0015	0.0466069
hsa04620---hsa04010	59,148,25	2.04708	0.0024	0.0673545
hsa04620---hsa04630	59,74,13	2.13988	0.0034	0.0861549
hsa04210---hsa04660	59,60,17	2.07815	0.0036	0.0894852
hsa04664---hsa04010	45,148,26	1.8817	0.0048	0.109816
hsa04060---hsa04062	153,115,39	1.81804	0.0064	0.132372
hsa04620---hsa04621	59,45,18	1.93274	0.0079	0.149911
hsa04514---hsa04060	79,153,2	1.9747	0.0083	0.15411
hsa04514---hsa04062	79,115,0	1.98057	0.0099	0.16924
hsa04662---hsa04062	45,115,23	1.75106	0.0107	0.17594
hsa04514---hsa04660	79,60,6	1.88422	0.0109	0.177535
hsa04664---hsa04630	45,74,9	1.89423	0.011	0.178322
hsa04620---hsa04060	59,153,10	1.80846	0.0134	0.201802
hsa04664---hsa04660	45,60,22	1.70492	0.0142	0.208905
hsa04664---hsa04662	45,45,22	1.63108	0.0188	0.244118
hsa04350---hsa04010	53,148,6	1.67976	0.0195	0.248765
hsa04150---hsa04350	33,53,3	1.78622	0.0211	0.258797
hsa04020---hsa04630	86,74,0	1.77343	0.0216	0.261775
hsa04620---hsa04210	59,59,20	1.615	0.0231	0.2703
hsa04620---hsa04150	59,33,11	1.66969	0.0237	0.273547
hsa04660---hsa04662	60,45,29	1.50058	0.0237	0.273547
hsa04514---hsa04210	79,59,0	1.75168	0.0256	0.283271
hsa04150---hsa04310	33,90,0	1.69268	0.0283	0.295784
hsa04621---hsa04210	45,59,9	1.63017	0.0283	0.295784
hsa04621---hsa04514	45,79,0	1.67974	0.0309	0.306589
hsa04370---hsa04630	43,74,9	1.58412	0.0336	0.316708
hsa04620---hsa04510	59,142,17	1.49665	0.0339	0.31777
hsa04370---hsa04660	43,60,21	1.42682	0.0361	0.325215
hsa04150---hsa04010	33,148,6	1.54461	0.0362	0.325539
hsa04514---hsa04662	79,45,0	1.60127	0.0375	0.329658
hsa04620---hsa04062	59,115,20	1.43546	0.0376	0.329967
hsa04350---hsa04920	53,43,1	1.62904	0.0383	0.332101
hsa04620---hsa04662	59,45,19	1.40685	0.0406	0.343163
hsa04620---hsa04020	59,86,0	1.5183	0.0483	0.37645
hsa04010---hsa04662	148,45,20	1.34048	0.0494	0.380787
hsa04622---hsa04630	37,74,2	1.50172	0.0501	0.383498
hsa04621---hsa04630	45,74,1	1.51707	0.0506	0.385411
hsa04664---hsa04210	45,59,10	1.40672	0.0507	0.385791
hsa04621---hsa04310	45,90,3	1.42284	0.0571	0.408766
hsa04070---hsa04630	50,74,7	1.37581	0.0586	0.413762
hsa04664---hsa04012	45,53,21	1.23279	0.0601	0.418624
hsa04662---hsa04630	45,74,10	1.36775	0.0613	0.42242
hsa04621---hsa04060	45,153,12	1.30799	0.064	0.430671
hsa04514---hsa04010	79,148,0	1.35435	0.0666	0.438258
hsa04510---hsa04350	142,53,10	1.2941	0.068	0.442206
hsa04910---hsa04062	71,115,20	1.25618	0.0688	0.444421
hsa04350---hsa04070	53,50,0	1.4044	0.0694	0.446063
hsa04310---hsa04010	90,148,16	1.25236	0.0695	0.446335
hsa04370---hsa04514	43,79,0	1.35775	0.0733	0.459524
hsa04622---hsa04920	37,43,9	1.26396	0.0772	0.472423
hsa04910---hsa04514	71,79,1	1.31459	0.0781	0.475313
hsa04210---hsa04062	59,115,14	1.21909	0.0794	0.479432
hsa04012---hsa04660	53,60,23	1.11162	0.0839	0.493202
hsa04310---hsa04630	90,74,3	1.24255	0.0874	0.503419
hsa04664---hsa04910	45,71,17	1.12554	0.0903	0.511578
hsa04010---hsa04660	148,60,25	1.09289	0.0918	0.515693
hsa04510---hsa04660	142,60,22	1.09321	0.095	0.524246
hsa04510---hsa04310	142,90,16	1.14051	0.0961	0.527116
hsa04010---hsa04630	148,74,3	1.18793	0.0981	0.532248
hsa04115---hsa04621	43,45,0	1.25833	0.0989	0.534269
hsa04150---hsa04115	33,43,1	1.23908	0.1024	0.542911
hsa04150---hsa04070	33,50,7	1.11639	0.1098	0.560168
hsa04012---hsa04630	53,74,13	1.07068	0.1106	0.561956
hsa04664---hsa04510	45,142,21	1.01424	0.1134	0.5681
hsa04012---hsa04662	53,45,18	0.995169	0.1137	0.568748
hsa04115---hsa04350	43,53,1	1.13262	0.1184	0.578654
hsa04150---hsa04622	33,37,0	1.15073	0.1231	0.588115
hsa04115---hsa03320	43,37,0	1.14463	0.1241	0.590074
hsa04510---hsa04662	142,45,19	0.958124	0.1272	0.596028
hsa04910---hsa04660	71,60,17	0.965847	0.1275	0.596595
hsa04350---hsa04210	53,59,1	1.09212	0.1301	0.601444
hsa04620---hsa04370	59,43,15	0.94469	0.1362	0.612375
hsa04115---hsa04512	43,59,1	1.05691	0.1365	0.612897
hsa04660---hsa04070	60,50,7	1.0139	0.1402	0.619223
hsa04664---hsa04060	45,153,1	1.0447	0.1414	0.621231
hsa04510---hsa04630	142,74,11	0.991235	0.1432	0.624203
hsa04060---hsa04630	153,74,40	0.84579	0.145	0.627128
hsa04150---hsa04512	33,59,0	1.02798	0.1505	0.635792
hsa04150---hsa04630	33,74,9	0.909881	0.1537	0.64065
hsa04350---hsa04662	53,45,2	0.986233	0.1576	0.646398
hsa04110---hsa04512	74,59,0	0.948578	0.1684	0.661397
hsa04010---hsa04210	148,59,19	0.857186	0.1709	0.664689
hsa04620---hsa04622	59,37,19	0.776011	0.1709	0.664689
hsa04664---hsa04370	45,43,28	0.693826	0.1736	0.668174
hsa04664---hsa04621	45,45,7	0.86502	0.1747	0.669573
hsa04210---hsa04020	59,86,3	0.916824	0.1763	0.671586
hsa04510---hsa04514	142,79,5	0.886479	0.1785	0.674316
hsa04510---hsa04010	142,148,29	0.835687	0.1791	0.675052
hsa04150---hsa04210	33,59,9	0.831838	0.1806	0.676879
hsa04912---hsa04370	59,43,17	0.773013	0.1814	0.677845
hsa04370---hsa04662	43,45,23	0.696251	0.1851	0.682239
hsa04310---hsa04330	90,29,3	0.85585	0.19	0.687876
hsa04514---hsa04020	79,86,0	0.882017	0.1908	0.688777
hsa04620---hsa04350	59,53,3	0.854737	0.1923	0.690453
hsa04012---hsa04330	53,29,0	0.890733	0.1925	0.690675
hsa04510---hsa04062	142,115,28	0.759753	0.1969	0.695483
hsa04010---hsa04060	148,153,15	0.817694	0.1979	0.696555
hsa04621---hsa04920	45,43,7	0.791046	0.199	0.697725
hsa04912---hsa03320	59,37,0	0.848422	0.2028	0.701699
hsa04621---hsa04012	45,53,4	0.795785	0.2093	0.708261
hsa04310---hsa04070	90,50,7	0.763955	0.2151	0.713876
hsa04350---hsa04310	53,90,7	0.749325	0.2193	0.71781
hsa04620---hsa04310	59,90,5	0.755523	0.2241	0.722175
hsa04150---hsa04920	33,43,4	0.720077	0.2243	0.722354
hsa04350---hsa04910	53,71,3	0.7581	0.2259	0.723777
hsa04150---hsa04062	33,115,11	0.681775	0.2266	0.724395
hsa04210---hsa04920	59,43,10	0.686979	0.2277	0.725361
hsa04010---hsa04062	148,115,21	0.702182	0.2301	0.727445
hsa04621---hsa04062	45,115,14	0.65864	0.2398	0.735554
hsa04622---hsa04350	37,53,1	0.712048	0.2469	0.741191
hsa04510---hsa04920	142,43,4	0.683731	0.247	0.741268
hsa04150---hsa04330	33,29,0	0.703413	0.2484	0.742351
hsa04912---hsa04910	59,71,12	0.637851	0.2489	0.742735
hsa04660---hsa04020	60,86,2	0.696934	0.2509	0.744261
hsa04370---hsa04210	43,59,11	0.617726	0.251	0.744337
hsa04664---hsa04150	45,33,11	0.57285	0.2515	0.744716
hsa04662---hsa04070	45,50,10	0.60718	0.2539	0.746517
hsa04514---hsa04512	79,59,7	0.623945	0.2653	0.754738
hsa04510---hsa04622	142,37,2	0.655238	0.2674	0.756195
hsa04620---hsa04070	59,50,7	0.585081	0.2751	0.76139
hsa04622---hsa04010	37,148,11	0.561315	0.2753	0.761522
hsa04621---hsa04350	45,53,3	0.60593	0.2757	0.761786
hsa04115---hsa04910	43,71,1	0.614025	0.2781	0.763355
hsa04370---hsa04060	43,153,2	0.587787	0.2953	0.774024
hsa04664---hsa04350	45,53,3	0.554832	0.2964	0.774674
hsa04622---hsa04062	37,115,5	0.547934	0.3007	0.777178
hsa04664---hsa04070	45,50,11	0.466183	0.3038	0.778949
hsa04310---hsa04920	90,43,2	0.534188	0.3102	0.782518
hsa04910---hsa04662	71,45,16	0.441712	0.3105	0.782682
hsa04110---hsa04350	74,53,7	0.473154	0.3212	0.78839
hsa04110---hsa04621	74,45,0	0.517626	0.3218	0.788701
hsa04912---hsa04660	59,60,11	0.455836	0.3242	0.789937
hsa04060---hsa04210	153,59,14	0.450906	0.3294	0.792565
hsa04062---hsa04020	115,86,11	0.442037	0.3355	0.795565
hsa04620---hsa04912	59,59,11	0.418588	0.3362	0.795904
hsa04621---hsa04010	45,148,14	0.413826	0.3397	0.797581
hsa04020---hsa03320	86,37,0	0.463661	0.3426	0.79895
hsa04622---hsa04910	37,71,2	0.399573	0.3582	0.806008
hsa04620---hsa04910	59,71,14	0.338165	0.3629	0.808038
hsa04150---hsa04662	33,45,11	0.294312	0.3692	0.810693
hsa04210---hsa04662	59,45,15	0.294339	0.3722	0.811932
hsa04350---hsa04512	53,59,5	0.341775	0.3756	0.813317
hsa04664---hsa04310	45,90,7	0.348997	0.3778	0.814202
hsa04150---hsa04621	33,45,2	0.317244	0.3797	0.81496
hsa04620---hsa04115	59,43,0	0.361332	0.3808	0.815395
hsa04115---hsa04210	43,59,6	0.319219	0.3815	0.815672
hsa04621---hsa04662	45,45,6	0.302942	0.3846	0.816885
hsa04664---hsa04912	45,59,21	0.234064	0.3912	0.819417
hsa04620---hsa04330	59,29,0	0.320051	0.3937	0.820357
hsa04370---hsa04062	43,115,20	0.262755	0.394	0.82047
hsa04664---hsa04622	45,37,5	0.262297	0.3992	0.822393
hsa04060---hsa04662	153,45,0	0.337313	0.4005	0.822867
hsa04621---hsa04370	45,43,4	0.261256	0.4017	0.823303
hsa04910---hsa04630	71,74,13	0.270735	0.4023	0.82352
hsa04010---hsa04330	148,29,0	0.327749	0.403	0.823773
hsa04910---hsa04210	71,59,13	0.243014	0.4113	0.826713
hsa04150---hsa04910	33,71,18	0.191517	0.4143	0.827751
hsa04510---hsa04210	142,59,12	0.253628	0.4159	0.8283
hsa04920---hsa04660	43,60,10	0.213453	0.417	0.828675
hsa04060---hsa04020	153,86,2	0.278008	0.419	0.829354
hsa04622---hsa04012	37,53,2	0.223945	0.4218	0.830294
hsa04310---hsa04514	90,79,0	0.26535	0.4244	0.831158
hsa04150---hsa04660	33,60,11	0.187846	0.4256	0.831554
hsa04912---hsa04210	59,59,1	0.243978	0.429	0.832666
hsa04912---hsa04350	59,53,2	0.231481	0.431	0.833313
hsa04510---hsa04060	142,153,14	0.226104	0.4365	0.835067
hsa04621---hsa04622	45,37,12	0.137081	0.4389	0.835821
hsa04920---hsa04012	43,53,5	0.180884	0.4427	0.837
hsa04350---hsa04370	53,43,2	0.191837	0.4437	0.837308
hsa04912---hsa04340	59,29,1	0.169537	0.4505	0.839369
hsa04150---hsa04510	33,142,16	0.127471	0.4512	0.839578
hsa04115---hsa04012	43,53,1	0.18386	0.4515	0.839668
hsa04370---hsa04012	43,53,20	0.0955282	0.4521	0.839846
hsa04512---hsa03320	59,37,1	0.171524	0.4524	0.839936
hsa04510---hsa04512	142,59,48	0.109423	0.4531	0.840143
hsa04115---hsa04062	43,115,0	0.189968	0.4555	0.840852
hsa04115---hsa04630	43,74,2	0.130787	0.4683	0.844525
hsa04622---hsa04070	37,50,0	0.135088	0.4703	0.845084
hsa04912---hsa04012	59,53,18	0.0913798	0.4729	0.845804
hsa04912---hsa04630	59,74,0	0.145743	0.4782	0.847252
hsa04664---hsa04920	45,43,5	0.0769928	0.482	0.848274
hsa04664---hsa04020	45,86,3	0.100664	0.4825	0.848407
hsa04910---hsa04012	71,53,26	0.0496075	0.4829	0.848514
hsa04115---hsa04010	43,148,4	0.116832	0.4835	0.848673
hsa04620---hsa04512	59,59,1	0.0993145	0.4865	0.849466
hsa04310---hsa04210	90,59,4	0.106599	0.4881	0.849885
hsa04912---hsa04622	59,37,4	0.048227	0.4932	0.851207
hsa04310---hsa04660	90,60,9	0.0768381	0.4943	0.851489
hsa04910---hsa04512	71,59,0	0.0652757	0.5014	0.853283
hsa04330---hsa04340	29,29,0	0.00892557	0.505	0.854176
hsa04912---hsa04514	59,79,0	0.0618843	0.5063	0.854496
hsa04622---hsa04210	37,59,10	0.0228264	0.5087	0.855083
hsa04621---hsa04510	45,142,7	0.0467768	0.5112	0.85569
hsa04514---hsa04070	79,50,0	0.0437876	0.5115	0.855762
hsa04920---hsa04330	43,29,0	0.0160207	0.5115	0.855762
hsa04920---hsa04630	43,74,6	6.16613e-06	0.516	0.85684
hsa04512---hsa04662	59,45,0	0.0148833	0.5242	0.858763
hsa04370---hsa04910	43,71,14	-0.0338956	0.5274	0.8595
hsa04621---hsa04070	45,50,0	-0.0243998	0.5361	0.861464
hsa04622---hsa04370	37,43,2	-0.0723964	0.5443	0.863266
hsa04621---hsa04330	45,29,0	-0.0784333	0.5479	0.864042
hsa04910---hsa04920	71,43,14	-0.0808809	0.549	0.864277
hsa04370---hsa04020	43,86,7	-0.0630541	0.5495	0.864384
hsa04622---hsa04330	37,29,0	-0.0839034	0.551	0.864703
hsa04920---hsa04662	43,45,7	-0.0893563	0.5513	0.864767
hsa04920---hsa04070	43,50,0	-0.0930299	0.5572	0.866007
hsa04350---hsa04012	53,53,4	-0.100807	0.5606	0.866711
hsa04370---hsa04330	43,29,0	-0.108145	0.5606	0.866711
hsa04620---hsa04012	59,53,17	-0.11068	0.5665	0.867916
hsa04664---hsa04330	45,29,0	-0.135094	0.5687	0.86836
hsa04910---hsa04330	71,29,0	-0.119165	0.5702	0.868661
hsa04370---hsa04340	43,29,0	-0.160868	0.5748	0.869575
hsa04910---hsa03320	71,37,3	-0.146506	0.5749	0.869595
hsa04912---hsa04510	59,142,13	-0.115586	0.5759	0.869791
hsa04350---hsa04630	53,74,2	-0.12881	0.5823	0.871038
hsa04622---hsa04310	37,90,3	-0.155101	0.585	0.871557
hsa04060---hsa04012	153,53,2	-0.17385	0.601	0.874547
hsa04350---hsa04060	53,153,13	-0.182067	0.6053	0.875327
hsa04912---hsa04060	59,153,1	-0.193983	0.612	0.876524
hsa04514---hsa04012	79,53,0	-0.224559	0.614	0.876876
hsa04060---hsa04070	153,50,0	-0.21364	0.6168	0.877367
hsa04010---hsa04070	148,50,3	-0.21133	0.6169	0.877384
hsa04621---hsa04912	45,59,6	-0.253545	0.6182	0.87761
hsa04514---hsa04330	79,29,0	-0.281061	0.6295	0.879543
hsa04210---hsa04070	59,50,7	-0.293971	0.6362	0.88066
hsa04010---hsa04920	148,43,10	-0.289711	0.6413	0.881497
hsa04510---hsa04910	142,71,24	-0.32447	0.6553	0.883734
hsa04115---hsa04310	43,90,3	-0.316711	0.656	0.883844
hsa04622---hsa04514	37,79,0	-0.349141	0.6572	0.884031
hsa04622---hsa04512	37,59,0	-0.354431	0.6583	0.884202
hsa04662---hsa03320	45,37,0	-0.378181	0.668	0.885692
hsa04912---hsa04920	59,43,2	-0.39735	0.6691	0.885858
hsa04012---hsa04062	53,115,22	-0.341058	0.6694	0.885904
hsa04340---hsa04020	29,86,1	-0.389524	0.6698	0.885964
hsa04920---hsa03320	43,37,11	-0.377458	0.6701	0.886009
hsa04150---hsa04370	33,43,12	-0.360766	0.6724	0.886355
hsa04330---hsa04662	29,45,0	-0.3985	0.6729	0.88643
hsa04062---hsa04070	115,50,12	-0.381401	0.6773	0.887084
hsa04512---hsa04070	59,50,0	-0.423323	0.6805	0.887555
hsa04310---hsa04662	90,45,10	-0.395862	0.6807	0.887585
hsa04020---hsa04070	86,50,16	-0.372401	0.6819	0.88776
hsa04912---hsa04330	59,29,0	-0.438746	0.6827	0.887877
hsa04115---hsa04622	43,37,0	-0.43599	0.6828	0.887892
hsa04370---hsa04070	43,50,11	-0.399051	0.6833	0.887965
hsa04620---hsa04920	59,43,9	-0.412252	0.684	0.888066
hsa04350---hsa04330	53,29,0	-0.437821	0.6854	0.888269
hsa04115---hsa04660	43,60,1	-0.452616	0.6864	0.888414
hsa04912---hsa04310	59,90,12	-0.418102	0.6895	0.88886
hsa04210---hsa04630	59,74,11	-0.438206	0.6963	0.889826
hsa04514---hsa03320	79,37,0	-0.469814	0.6974	0.88998
hsa04350---hsa04660	53,60,5	-0.467307	0.6998	0.890316
hsa04664---hsa04512	45,59,0	-0.49653	0.7025	0.890692
hsa04920---hsa04020	43,86,0	-0.498413	0.7089	0.891572
hsa04621---hsa03320	45,37,0	-0.536471	0.7154	0.892451
hsa04010---hsa04340	148,29,1	-0.517794	0.7191	0.892945
hsa04621---hsa04910	45,71,4	-0.520357	0.7225	0.893395
hsa04115---hsa04514	43,79,0	-0.536981	0.7228	0.893435
hsa04662---hsa04020	45,86,4	-0.546505	0.7264	0.893907
hsa04370---hsa04010	43,148,26	-0.47043	0.7283	0.894154
hsa04910---hsa04010	71,148,13	-0.511956	0.7315	0.894568
hsa04060---hsa03320	153,37,0	-0.576074	0.7327	0.894723
hsa04514---hsa04920	79,43,0	-0.566083	0.7332	0.894787
hsa04150---hsa03320	33,37,1	-0.597024	0.734	0.89489
hsa04210---hsa04012	59,53,9	-0.570317	0.7453	0.896318
hsa04010---hsa04020	148,86,15	-0.570173	0.7459	0.896393
hsa04115---hsa04662	43,45,0	-0.637689	0.747	0.89653
hsa04310---hsa04020	90,86,12	-0.582195	0.7482	0.896679
hsa04660---hsa03320	60,37,0	-0.646079	0.7506	0.896975
hsa04310---hsa04910	90,71,4	-0.605183	0.7519	0.897135
hsa04620---hsa03320	59,37,0	-0.655974	0.7528	0.897245
hsa04910---hsa04060	71,153,0	-0.634856	0.7579	0.897866
hsa04621---hsa04512	45,59,0	-0.66365	0.761	0.89824
hsa04310---hsa04012	90,53,10	-0.635049	0.7614	0.898288
hsa04115---hsa04070	43,50,1	-0.672928	0.7628	0.898455
hsa04340---hsa04070	29,50,0	-0.711458	0.7661	0.898848
hsa04512---hsa04020	59,86,0	-0.685678	0.7667	0.89892
hsa04370---hsa04920	43,43,2	-0.704418	0.7705	0.899368
hsa04150---hsa04514	33,79,0	-0.729733	0.7734	0.899707
hsa04510---hsa03320	142,37,2	-0.690618	0.7756	0.899964
hsa04350---hsa04020	53,86,0	-0.731171	0.7784	0.900287
hsa04664---hsa04340	45,29,0	-0.774852	0.7815	0.900644
hsa04912---hsa04662	59,45,7	-0.72954	0.786	0.901156
hsa04664---hsa04115	45,43,0	-0.779599	0.787	0.90127
hsa04310---hsa04370	90,43,10	-0.741768	0.7978	0.902476
hsa04010---hsa04012	148,53,21	-0.700093	0.7984	0.902542
hsa04210---hsa03320	59,37,0	-0.833333	0.7989	0.902597
hsa04350---hsa04514	53,79,0	-0.824849	0.7991	0.902619
hsa04350---hsa03320	53,37,0	-0.839744	0.8022	0.902959
hsa04210---hsa04330	59,29,0	-0.846643	0.8032	0.903068
hsa04060---hsa04920	153,43,4	-0.817049	0.8087	0.903664
hsa04310---hsa04060	90,153,0	-0.842503	0.8089	0.903685
hsa04310---hsa04340	90,29,15	-0.774739	0.8243	0.905314
hsa04150---hsa04912	33,59,2	-0.907902	0.8247	0.905356
hsa04910---hsa04070	71,50,12	-0.856397	0.8264	0.905532
hsa04012---hsa04340	53,29,1	-0.929101	0.8272	0.905615
hsa04660---hsa04340	60,29,1	-0.931383	0.8305	0.905954
hsa04510---hsa04020	142,86,6	-0.932324	0.8353	0.906444
hsa04310---hsa04062	90,115,12	-0.901788	0.836	0.906515
hsa04510---hsa04370	142,43,25	-0.792551	0.8364	0.906556
hsa04622---hsa04060	37,153,4	-0.938183	0.8364	0.906556
hsa04664---hsa03320	45,37,0	-1.00033	0.8411	0.90703
hsa04010---hsa03320	148,37,0	-1.04531	0.8506	0.907972
hsa04115---hsa04912	43,59,0	-1.09243	0.8588	0.908771
hsa04060---hsa04340	153,29,2	-1.05874	0.8601	0.908896
hsa04330---hsa04512	29,59,0	-1.10828	0.8616	0.90904
hsa04115---hsa04920	43,43,0	-1.1087	0.8655	0.909413
hsa04150---hsa04020	33,86,0	-1.14471	0.8679	0.909641
hsa04912---hsa04010	59,148,31	-0.943104	0.8715	0.909981
hsa04310---hsa04512	90,59,0	-1.15945	0.8761	0.910411
hsa04514---hsa04340	79,29,0	-1.19201	0.8782	0.910606
hsa04310---hsa03320	90,37,1	-1.18315	0.8783	0.910615
hsa04115---hsa04060	43,153,1	-1.19384	0.8806	0.910828
hsa04912---hsa04020	59,86,27	-0.971626	0.8827	0.911021
hsa04150---hsa04012	33,53,14	-0.991308	0.8834	0.911085
hsa04115---hsa04370	43,43,0	-1.23389	0.885	0.911232
hsa04150---hsa04060	33,153,3	-1.21674	0.8898	0.911668
hsa04912---hsa04070	59,50,12	-1.09134	0.8909	0.911768
hsa04920---hsa04062	43,115,7	-1.17741	0.8917	0.91184
hsa04012---hsa04070	53,50,11	-1.11332	0.8918	0.911849
hsa04070---hsa03320	50,37,0	-1.24222	0.8928	0.911939
hsa04910---hsa04020	71,86,6	-1.21245	0.8936	0.912011
hsa04330---hsa03320	29,37,0	-1.26942	0.894	0.912047
hsa04510---hsa04070	142,50,12	-1.19818	0.8991	0.912502
hsa04150---hsa04340	33,29,0	-1.32985	0.907	0.913198
hsa04110---hsa04622	74,37,0	-1.39203	0.9105	0.913503
hsa04664---hsa04110	45,74,0	-1.41008	0.9119	0.913624
hsa04622---hsa04660	37,60,9	-1.22562	0.915	0.913892
hsa04062---hsa03320	115,37,0	-1.44686	0.9162	0.913995
hsa04330---hsa04660	29,60,0	-1.44062	0.9167	0.914038
hsa04340---hsa03320	29,37,0	-1.47056	0.9256	0.914794
hsa04912---hsa04062	59,115,19	-1.41092	0.9375	0.915784
hsa04370---hsa03320	43,37,0	-1.61506	0.9379	0.915817
hsa04350---hsa04340	53,29,6	-1.48417	0.9421	0.916161
hsa04330---hsa04062	29,115,0	-1.68424	0.9432	0.916251
hsa04510---hsa04330	142,29,0	-1.65518	0.9433	0.916259
hsa04620---hsa04340	59,29,0	-1.68295	0.9468	0.916542
hsa04660---hsa04512	60,59,0	-1.74062	0.9474	0.916591
hsa04622---hsa04662	37,45,4	-1.5571	0.9478	0.916623
hsa04510---hsa04012	142,53,31	-1.36399	0.9481	0.916647
hsa04110---hsa04012	74,53,4	-1.68787	0.9528	0.917024
hsa04621---hsa04020	45,86,0	-1.80223	0.953	0.91704
hsa04512---hsa04630	59,74,0	-1.90603	0.9619	0.917745
hsa04115---hsa04020	43,86,0	-1.9742	0.965	0.917987
hsa04622---hsa03320	37,37,0	-1.92573	0.9666	0.918112
hsa04012---hsa04020	53,86,7	-1.89074	0.9699	0.918368
hsa04110---hsa03320	74,37,0	-2.06155	0.9709	0.918445
hsa04662---hsa04340	45,29,1	-1.94737	0.9716	0.918499
hsa04210---hsa04512	59,59,0	-2.05725	0.9734	0.918638
hsa04012---hsa03320	53,37,0	-2.11651	0.9751	0.918768
hsa04350---hsa04062	53,115,5	-2.07383	0.9756	0.918806
hsa04622---hsa04340	37,29,0	-2.05264	0.976	0.918837
hsa04012---hsa04512	53,59,0	-2.14205	0.9765	0.918875
hsa04110---hsa04310	74,90,6	-2.13312	0.9785	0.919027
hsa04330---hsa04020	29,86,0	-2.23289	0.979	0.919065
hsa03320---hsa04630	37,74,0	-2.25756	0.9797	0.919118
hsa04330---hsa04630	29,74,0	-2.24517	0.9805	0.919179
hsa04370---hsa04512	43,59,0	-2.2482	0.9808	0.919202
hsa04150---hsa04110	33,74,0	-2.2305	0.9812	0.919232
hsa04621---hsa04340	45,29,0	-2.3026	0.9827	0.919345
hsa04110---hsa04920	74,43,0	-2.35681	0.9836	0.919413
hsa04110---hsa04910	74,71,1	-2.49387	0.9867	0.919646
hsa04330---hsa04070	29,50,0	-2.48238	0.9882	0.919758
hsa04910---hsa04340	71,29,2	-2.55257	0.9922	0.920056
hsa04060---hsa04330	153,29,0	-2.80482	0.9922	0.920056
hsa04340---hsa04630	29,74,0	-2.67815	0.9927	0.920093
hsa04062---hsa04340	115,29,2	-2.69393	0.9934	0.920145
hsa04060---hsa04512	153,59,0	-2.97488	0.9944	0.920219
hsa04622---hsa04020	37,86,0	-2.89637	0.9952	0.920278
hsa04115---hsa04330	43,29,0	-2.78617	0.9956	0.920307
hsa04510---hsa04340	142,29,1	-2.96219	0.9956	0.920307
hsa04110---hsa04010	74,148,4	-3.34024	0.997	0.92041
hsa04010---hsa04512	148,59,0	-3.34117	0.9972	0.920425
hsa04512---hsa04062	59,115,0	-3.28894	0.9973	0.920432
hsa04920---hsa04340	43,29,0	-3.04649	0.9975	0.920447
hsa04110---hsa04070	74,50,0	-3.23841	0.9978	0.920469
hsa04210---hsa04340	59,29,1	-3.01699	0.998	0.920484
hsa04110---hsa04370	74,43,0	-3.23006	0.998	0.920484
hsa04115---hsa04340	43,29,0	-3.24865	0.9982	0.920498
hsa04620---hsa04110	59,74,0	-3.61306	0.9986	0.920528
hsa04110---hsa04912	74,59,0	-3.6489	0.9989	0.92055
hsa04115---hsa04510	43,142,4	-3.44428	0.999	0.920557
hsa04912---hsa04512	59,59,0	-3.83416	0.9991	0.920564
hsa04110---hsa04330	74,29,2	-3.51925	0.9994	0.920586
hsa04110---hsa04630	74,74,3	-4.71902	0.9998	0.920615
hsa04920---hsa04512	43,59,1	-4.3889	1	0.92063
hsa04110---hsa04340	74,29,1	-4.69451	1	0.92063
hsa04110---hsa04660	74,60,2	-4.96599	1	0.92063
hsa04110---hsa04662	74,45,1	-5.19914	1	0.92063
hsa04110---hsa04514	74,79,0	-5.2758	1	0.92063
hsa04110---hsa04210	74,59,2	-5.34207	1	0.92063
hsa04110---hsa04510	74,142,3	-5.79713	1	0.92063
hsa04110---hsa04060	74,153,1	-5.84819	1	0.92063
hsa04110---hsa04020	74,86,0	-7.47947	1	0.92063
hsa04110---hsa04062	74,115,1	-9.58612	1	0.92063

## Sheet: weighted_genes.lungC
EntrezGene	Gene
2207	FCER1G
5880	RAC2
5579	PRKCB1
6352	CCL5
929	CD14
6351	CCL4
958	CD40
4615	MYD88
7096	TLR1
23533	PIK3R5
51311	TLR8
3937	LCP2
695	BTK
5788	PTPRC
3683	ITGAL
3689	ITGB2
920	CD4
925	CD8A
3684	ITGAM
3676	ITGA4
6404	SELPLG
1794	DOCK2
3717	JAK2
409	ARRB2
9844	ELMO1
1230	CCR1
3055	HCK
2268	FGR
6362	CCL18
3702	ITK
57580	PREX1
7852	CXCR4
5293	PIK3CD
10666	CD226
919	CD247
3458	IFNG
7099	TLR4
4085	MAD2L1
991	CDC20
890	CCNA2
701	BUB1B
990	CDC6
7272	TTK
6241	RRM2
983	CDC2
1111	CHEK1
891	CCNB1
4175	MCM6
8318	CDC45L
836	CASP3
5366	PMAIP1
51512	GTSE1
58484	NLRC4
7128	TNFAIP3
4671	NAIP
834	CASP1
9051	PSTPIP1
7535	ZAP70
2534	FYN
22900	CARD8
22861	NLRP1
330	BIRC3
3587	IL10RA
1439	CSF2RB
3560	IL2RB
3575	IL7R
3600	IL15
50615	IL21R
7133	TNFRSF1B
80301	PLEKHO2
414062	CCL3L3
939	CD27
6375	XCL1
2323	FLT3LG
356	FASLG
6846	XCL2
10673	TNFSF13B
29851	ICOS
6776	STAT5A
5777	PTPN6

## Sheet: GSEA.lungC
NAME	SIZE	ES	NES	NOM p-val	FDR q-val
hsa04062	162	-0.457827	-2.24929	0	0
hsa04621	57	-0.485252	-1.99891	0	0
hsa04920	59	-0.474706	-1.9914	0	0
hsa04060	213	-0.387487	-1.98461	0	0
hsa04110	102	0.441826	1.99162	0	0
hsa04630	115	-0.4146	-1.91635	0	0.0004
hsa04010	237	-0.356203	-1.84026	0	0.00120258
hsa04115	62	0.381617	1.5713	0.00705467	0.00806055
hsa04514	114	-0.351059	-1.6405	0	0.0117151
hsa04910	123	-0.347921	-1.64669	0	0.0133887
hsa04020	132	-0.336023	-1.58597	0.00220264	0.0153536
hsa04350	76	-0.366217	-1.59395	0.00840336	0.0153754
hsa04664	70	-0.376947	-1.59799	0.0104822	0.0160125
hsa04510	179	-0.311579	-1.56354	0.00668151	0.0164965
hsa03320	51	-0.374943	-1.53466	0.021322	0.0200077
hsa04660	98	-0.334244	-1.50628	0.00873363	0.0230119
hsa04912	87	-0.325427	-1.46294	0.0152505	0.0315802
hsa04662	69	-0.339176	-1.45274	0.0298851	0.033074
hsa04210	79	-0.322168	-1.39592	0.0400844	0.0520921
hsa04512	75	0.30411	1.31773	0.067029	0.0646588
hsa04620	86	-0.306119	-1.35411	0.0443925	0.0672395
hsa04070	66	-0.311204	-1.32804	0.0615711	0.0792861
hsa04370	69	-0.313447	-1.31955	0.0607375	0.0807505
hsa04150	49	-0.322788	-1.26717	0.116998	0.113363
hsa04310	131	-0.255876	-1.22552	0.102679	0.145058
hsa04012	82	-0.266884	-1.17643	0.15565	0.189023
hsa04622	52	-0.22271	-0.892433	0.656109	0.749606
hsa04330	42	-0.205925	-0.782759	0.848889	0.93368
hsa04340	49	-0.178247	-0.716825	0.917241	0.95959

## Sheet: LiteratureMining_lungC_gene
GeneSymbol	EntrezGene	Number of Abstracts the Gene Occurs
EGFR	1956	4577
SCLC	7864	4272
EGF	1950	4062
TP53	7157	3613
VEGFA	7422	1494
IL2	3558	1317
SMUG1	23583	1236
TNF	7124	1163
ODZ1	10178	1142
PCNA	5111	1089
AKT1	207	951
ERBB2	2064	884
KRAS	3845	871
HRAS	3265	868
TGFB1	7040	832
IFNG	3458	775
BCL2	596	765
CSF3	1440	725
HGF	3569	712
CDKN2A	1029	687
NFKB1	4790	621
PRO1341	213	603
CASP3	836	588
MYC	4609	580
MMP9	4318	579
XRCC1	7515	579
MMP2	4313	566
PTGS2	5743	565
POMC	5443	563
CD4	920	547
MT1E	4493	536
ROS1	6098	510
GRP	2922	494
PLG	5340	485
ENO2	2026	459
SMST	6750	458
FLJ36605	7431	452
THM	7063	448
CD8A	925	435
TCEAL1	9338	432
NKX2-1	7080	430
CCND1	595	408
CISH	1154	401
AFP	174	387
TRT	7015	380
CSF2	1437	372
NAF	3576	364
HLA-E	3133	353
CTNNB1	1499	349
KDR	3791	349
CYP1A1	1543	347
IL1F6	27179	345
IL1B	3553	337
ILPR	3630	324
GSTM1	2944	314
CD40LG	959	311
IGF1	3479	301
ERCC1	2067	300
HGF	3082	291
MAPK3	5595	289
IFNA1	3439	283
MN1	4330	283
IL10	3586	282
JUN	3725	276
LAMC2	3918	275
CD44	960	272
AVP	551	267
IL4	3565	262
BCL2L1	598	261
MAMLD1	10046	257
SERPINA5	5104	252
HIF1A	3091	251
APC	324	249
DUOXA1	90527	247
RTEL1	51750	244
CDAN1	146059	243
CD34	947	239
MUC1	4582	237
TGN	7038	235
RB1	5925	234
DDX41	51428	232
STAT3	6774	229
PTEN	5728	229
PKC	50818	227
MVD	4597	222
CD56	4684	222
TIMM8A	1678	221
ABCB1	5243	221
COL18A1	80781	218
ADC	113451	216
HGFR	4233	216
ADM	133	215
MSMP	692094	211
CCNO	10309	206
DES	1674	206
KRT19	3880	205
CASP8	841	201
MTX1	4580	201
CRP	1401	201
MAPK8	5599	199
NUDT6	11162	199
RASSF1	11186	198
TTF1	7270	196
IRF6	3664	195
CATALASE	847	193
FHIT	2272	193
SYP	6855	192
PLAU	5328	191
CASP9	842	189
TGFA	7039	188
KRT7	3855	185
PTHLH	5744	184
ICAM1	3383	184
MMRN1	22915	183
IGF1R	3480	178
CD246	238	177
IGA	973	174
HM89	7852	174
ABCB6	10058	174
EPO	2056	173
PTH	5741	169
MDM2	4193	166
PGR	5241	166
PRO2086	7018	165
TIMP1	7076	165
BRAF	673	165
VIP	7432	163
AKR1B1	231	163
NPC1	4864	162
PPARG	5468	158
GSTP1	2950	158
GASTRIN	2520	157
TH1L	51497	156
ATM	472	152
K20	54474	152
NEURL	9148	149
HDAC9	9734	145
FGF2	2247	144
FLT1	2321	143
CO2	717	142
KLK3	354	142
PCA	559	140
MVP	9961	139
IGF2	3481	139
HTC2	3342	138
MYCN	4613	137
GSTT1	2952	137
VEGFC	7424	136
MUC16	94025	135
PSCP	672	134
CADM1	23705	134
ERBB3	2065	134
CSF1	1435	133
LBR	3930	133
ABCG2	9429	132
NQO1	1728	131
CXCL12	6387	128
ERCC2	2068	128
ACACA	31	127
TIMP2	7077	127
MYCL1	4610	125
ATP2C1	27032	125
MMP1	4312	125
SLC3A2	6520	124
SERPINE1	5054	124
MGMT	4255	123
ESR	2099	122
DLST	1743	122
CHL1	10752	121
SPP1	6696	120
MPO	4353	120
OGG1	4968	120
PTK2	5747	119
PRS	5640	118
SOD2	6648	116
IL1A	3552	115
IFNB1	3456	115
RARB	5915	114
MLC1	23209	114
CSO	1403	114
DDX53	168400	111
CTX	1593	109
EPCAM	4072	108
TNFRSF10B	8795	108
RAF1	5894	107
NFKBIA	4792	107
STS	412	106
MIB1	57534	106
AHR	196	106
IGFBP3	3486	106
DHFR	1719	105
E2F1	1869	104
CCL2	6347	104
DECR1	1666	104
GATA3	2625	103
WT1	7490	103
MCL1	4170	103
QPCT	25797	102
CDKN1A	1026	102
PLF	450095	102
RRM1	6240	102
PDGFRB	5159	101
HSPG2	3339	101
STK11	6794	101
RELA	5970	100
NEU1	4758	100
CGA	1081	100
CDK4	1019	99
CTS1	1507	99
SLC10A1	6554	98
CAV1	857	96
AES	166	96
THBS1	7057	96
PDPN	10630	96
MIP	4284	95
KITLG	4254	95
CYP2E1	1571	95
IL3	3562	94
HSPA4	3308	94
NOVA2	4858	91
RHOA	387	90
HPSE	10855	89
MAP2K1	5604	88
SETD2	29072	88
DPEP1	1800	87
PBT	3815	86
MMP14	4323	86
ARO	1588	86
FLT4	2324	86
ERB	2100	85
ELANE	1991	83
ENT	4907	83
SLC2A1	6513	82
SLC4A1	6521	81
PIK3CA	5290	80
GPT	2875	80
CCNB1	891	80
FASL	356	80
TWSG1	57045	79
GHRH	2691	79
PRDX2	7001	79
PROM1	8842	79
SOAT1	6646	78
DPYD	1806	78
MAPK10	5602	78
PRKCA	5578	77
CYP1B1	1545	77
BCR	613	77
DNAH8	1769	77
LPA	4018	77
TYMP	1890	76
CYP2D6	1565	76
SLC12A2	6558	76
MS1	4397	76
B3GAT1	27087	76
JAG1	182	76
A 4	3476	75
ACTB	60	75
BLM	641	75
PPIG	9360	75
XIAP	331	75
IL18	3606	75
CDK2	1017	75
VTN	7448	74
MMP3	4314	74
ZNF77	58492	73
ERVWE1	30816	73
F10	2159	73
GAPDH	2597	72
TNFRSF10A	8797	72
SLC25A10	1468	72
ASV	6714	72
NR1H2	7376	71
DNMT1	1786	71
AIS	367	71
RAC1	5879	71
EFS	10278	70
GNRH1	2796	70
THY1	7070	70
VCAM1	7412	69
VHL	7428	69
NAT2	10	69
CYP2A6	1548	69
LEP	3952	69
HSP90AA1	3320	68
PDGFRA	5156	68
MX1	4599	68
MLH1	4292	67
AGT	183	67
MMP7	4316	67
SDS	10993	67
SCGB1A1	7356	67
WDTC1	23038	67
IL13	3596	66
MCC	4163	66
VWF	7450	66
TYMS	7298	66
SLC5A7	60482	65
ADENOSINE DEAMINASE	100	65
EML4	27436	65
CD40	958	65
NTS	4922	65
RFS	65211	64
CD80	941	64
CD53	963	64
PRL	5617	64
NHS	4810	64
CDX2	1045	64
THBD	7056	63
CD68	968	62
SLC17A5	26503	62
TXN	7295	62
MUC5AC	4586	62
CD86	942	62
IGHE	3497	61
HMOX1	3162	61
ARHGAP24	83478	61
TFPI	7035	61
ZNF135	7694	60
ABCC1	4363	60
CRH	1392	60
NPPA	4878	60
MIR21	406991	60
MSLN	10232	59
ABCC3	8714	59
CALB2	794	59
HMI	3160	58
MSH2	4436	58
SEC14L2	23541	58
SMAD2	4087	57
NEP	4311	57
TNS1	7145	57
KRT18	3875	57
BAK1	578	57
CREB1	1385	57
PGCP	10404	57
CD99	4267	57
HSPA5	3309	56
GPI	2821	56
SERPINA1	5265	56
YWHAZ	7534	56
IL15	3600	56
MRC	4345	55
CCL21	6366	55
MTG1	92170	55
CXCL10	3627	54
CCL28	56477	54
CCT4	10575	54
DAPK1	1612	54
FOXP3	50943	54
HCCS	3052	54
HDC	3067	54
TFR	7037	54
SCT	6343	54
ANTXR2	118429	54
CHEK2	11200	54
FGFR1	2260	54
KAT2B	8850	53
TP63	8626	53
AD5	8081	53
SDGF	374	53
CD82	3732	53
IL17A	3605	53
INA	9118	53
KRT5	3852	52
EML1	2009	52
MEAI	4221	52
ACR	49	52
HPD	3242	52
CCK	885	52
CYP1A2	1544	52
LGALS3	3958	52
IL5	3567	52
APEX1	328	51
GSK3B	2932	51
EDN1	1906	51
GRPR	2925	51
PRKDC	5591	51
SMAD4	4089	50
MAGEA3	4102	50
GFAP	2670	50
IVL	3713	50
TERC	7012	50
CONNEXIN	100128922	50
TSC2	7249	50
FIGF	2277	50
MUC2	4583	50
GNLY	10578	49
ENG	2022	49
TPO	7173	49
GJA8	2703	49
GJA1	2697	49
TOP2A	7153	49
EZR	7430	49
SFTPC	6440	49
PDGFB	5155	49
TBX1	6899	49
CCL5	6352	49
NOTCH1	4851	49
GSR	2936	48
DNMT3B	1789	48
BRCA2	675	48
H2AFX	3014	48
LCT	3938	48
GD3	117189	48
EGR1	1958	48
ELN	2006	48
KRT8	3856	48
CHEK1	1111	48
DCK	1633	48
LIF	3976	47
FGFR3	2261	47
PGRMC1	10857	47
RPS6KB1	6198	47
XPC	7508	47
B2M	567	47
ALDH9A1	223	47
HNF4A	3172	46
HLP	1576	46
PI3	5266	45
ENPP3	5169	45
STAT1	6772	45
SLC45A2	51151	45
NPS	594857	45
IL24	11009	45
PLK1	5347	45
CTSB	1508	45
TLR9	54106	44
HHF5	3643	44
SFTPB	6439	44
GNPTAB	79158	44
XRCC3	7517	44
MAA	4080	44
PRB1	5542	44
DST	667	44
RAD51	5888	44
SLC25A1	6576	44
IL2RA	3559	43
BA2	928	43
SERPINC1	462	43
NDRG1	10397	43
CFTR	1080	43
PXN	5829	43
POU5F1	5460	43
SOX2	6657	43
MTHFR	4524	43
ERBB4	2066	43
TLR4	7099	43
CTAG1B	1485	42
CDC42	998	42
PPP2R4	5524	42
UROD	7389	42
MMP8	4317	42
CDK1	983	42
SERPINB5	5268	42
HPRT1	3251	42
XPA	7507	42
CTLA4	1493	42
PTS	5805	42
DAP	1611	42
IFNA2	3440	42
EBP	10682	42
NME1	4830	41
LCA	5788	41
PPARA	5465	41
MIF	4282	41
FGFR2	2263	41
CDH13	1012	41
SMAD3	4088	41
CPM	1368	40
CD28	940	40
FAP	2191	40
AIFM1	9131	40
ITGB1	3688	40
PDXP	57026	39
TGFBR2	7048	39
CNR	1268	39
TIMP3	7078	39
DDIT3	1649	39
PGF	5228	39
FOXM1	2305	39
CD5	921	39
BSG	682	39
EWSR1	2130	39
CGB	1082	39
TRIM27	5987	39
ANC	8066	39
HMGA2	8091	38
CDKN2B	1030	38
HBEGF	1839	38
CD14	929	38
AAVS1	17	38
FLT3	2322	38
NGF	4803	38
CKB	1152	38
CD2	914	38
GRN	2896	38
SSTR2	6752	38
REN	5972	38
ABCA4	24	38
DDC	1644	37
HTR3A	3359	37
LTF	4057	37
PTK2B	2185	37
CLU	1191	37
LCS	84565	37
SPO	4025	37
INTU	27152	37
NF2	4771	37
HPA1S	3240	37
MCR	4306	37
HSP90B2P	7190	37
TUBA1B	10376	36
SLN	6588	36
ASPSCR1	79058	36
CYLD	1540	36
NAT1	9	36
HIST2H2BE	8349	36
IGHG3	3502	36
RCVRN	5957	36
MAPK1	5594	36
SMARCA2	6595	36
LTA	4049	36
FEV	54738	36
PAOD2	1136	36
SHEP3	7299	35
HBB	3043	35
CFLAR	8837	35
SLC5A5	6528	35
UBE2D1	7321	35
PGP	283871	35
SRSF1	6426	35
NRAS	4893	34
IL7	3574	34
NAAA	27163	34
MLN	4295	34
ZEB1	6935	34
KIAA0101	9768	34
RARS	5917	34
SDC1	6382	34
TYRP1	7306	34
SMAC	56616	34
JAK2	3717	34
SERPINF2	5345	34
ATR	545	34
LOC51152	51152	34
BMI1	648	34
PVALB	4151	34
PMAIP1	5366	34
INSRR	3645	34
CD30	943	33
GSTZ1	2954	33
CP2	1356	33
LGALS1	3956	33
EP300	2033	33
GLI2	2736	33
APN	290	33
S100A4	6275	33
CDA	978	33
CD24	100133941	33
HMGB1	3146	33
EPHX1	2052	33
C8orf4	56892	33
NR0B1	190	33
ALDH1A1	216	33
EPHA2	1969	32
SKP2	6502	32
CXCL1	2919	32
MRC1	4360	32
CD38	952	32
STN	1177	32
TWIST1	7291	32
C12orf57	113246	32
APCS	325	32
CSE	1433	32
EIF4EBP1	1978	32
ITGAM	3684	32
MATN3	4148	32
MLL	4297	32
DCC	1630	31
CXCR1	3577	31
PHIP	55023	31
HLA-A	3105	31
PCSK7	9159	31
EBI1	1236	31
ACTA1	58	31
IGFBP2	3485	31
NOC2L	26155	31
KAT5	10524	31
MMS	338340	31
GADD45A	1647	31
LNCR2	1138	31
MMP12	4321	31
DDR1	780	31
CLDN11	5010	31
ANKRD36B	57730	31
EPAS1	2034	30
LCH	8118	30
APP	351	30
CREM	1390	30
RAPGEF5	9771	30
CA9	768	30
MAS1	4142	30
RHBDL1	9028	30
PML	5371	30
SMN1	6606	30
RUNX2	860	30
ID1	3397	30
SLC26A3	1811	30
WDR82P1	728505	30
PGS	5242	30
CD1A	909	30
ANKRD11	29123	30
KRT14	3861	30
ABCC5	10057	30
SOD1	6647	30
